# Supplementary material for: Post-Translational Decrease in Respiratory Chain Proteins in the Polg Mutator Mouse Brain
Source: PLoS One. 2014 Apr 10;9(4):e94646. doi: 10.1371/journal.pone.0094646 (PMC3983222; doi:10.1371/journal.pone.0094646)
Supplement: File S1 — Complete iTRAQ Dataset. (XLSX) [file pone.0094646.s002.xlsx]

## Sheet: Run1
User
E-mail
MS data file
Database	Sprot
Taxonomy	Mus. (16,662 sequences)
Timestamp	17 Apr 2013 at 23:23:43 GMT
Type of search	MS/MS Ion Search
Quantitation	iTRAQ 8plex (Applied Biosystems iTRAQ(TM) 8-plex)
Enzyme	Trypsin
Fixed modifications	iTRAQ8plex (N-term),iTRAQ8plex (K)
Variable modifications	Methylthio (C),Oxidation (M),iTRAQ8plex (Y)
Mass values	Monoisotopic
Protein mass	Unrestricted
Peptide mass tolerance	20 ppm
Fragment mass tolerance	0.2 Da
Max missed cleavages	2
Instrument type	ESI-FTICR
Number of queries	81023
Significance threshold p<	0.00935
Max. number of families	AUTO
Ions score or expect cut-off	0
Preferred taxonomy	All entries
Show Percolator scores?	no
Quantitation parameters:
Protein ratio type	weighted
Normalisation	median
Min. precursor charge	1
Outlier removal	auto
Min. number of peptides	2
Peptide threshold	at least homology
Unique peptides only?	yes
Filters:	(114/113 > 0 AND 115/113 > 0 AND 116/113 > 0 AND 117/113 > 0 AND 119/113 > 0 AND 121/113 > 0)
Accession	Description	WT/WT_205	WT/D257A_237	Mutator_207	Mutator_236	Mutator_240	Mutator_248
ATPA_MOUSE	(Q03265) ATP synthase subunit alpha, mitochondrial	0.962	1.014	0.976	1.094	0.933	0.832
AT1A3_MOUSE	(Q6PIC6) Sodium/potassium-transporting ATPase subunit alpha-3	1.075	0.953	1.135	0.962	1.012	0.918
AT1A1_MOUSE	(Q8VDN2) Sodium/potassium-transporting ATPase subunit alpha-1	1.056	0.919	0.978	0.944	1.017	0.909
AT1A2_MOUSE	(Q6PIE5) Sodium/potassium-transporting ATPase subunit alpha-2	0.971	0.962	1.095	0.948	0.983	0.843
PLEC_MOUSE	(Q9QXS1) Plectin	0.944	0.919	1.215	0.918	0.915	0.83
ATPB_MOUSE	(P56480) ATP synthase subunit beta, mitochondrial	0.942	1.011	0.916	1.016	0.941	0.864
SPTN1_MOUSE	(P16546) Spectrin alpha chain, non-erythrocytic 1	0.952	0.939	0.988	0.935	1.076	1.012
SPTB2_MOUSE	(Q62261) Spectrin beta chain, non-erythrocytic 1	0.987	1.004	1.045	0.97	1.117	1.044
KCRB_MOUSE	(Q04447) Creatine kinase B-type	1.078	1.054	1.027	1.05	0.956	0.931
KPYM_MOUSE	(P52480) Pyruvate kinase isozymes M1/M2	0.978	1.064	1.101	1.159	1.044	1.116
TBA1B_MOUSE	(P05213) Tubulin alpha-1B chain	1.002	1.089	1.124	1.073	1.105	1.132
TBA4A_MOUSE	(P68368) Tubulin alpha-4A chain	1.038	1.125	1.109	1.067	1.173	1.193
CALM_MOUSE	(P62204) Calmodulin	1.124	1.21	1.312	1.036	1.195	1.148
ACTB_MOUSE	(P60710) Actin, cytoplasmic 1	0.944	0.994	0.85	0.959	1.037	1.055
DYHC1_MOUSE	(Q9JHU4) Cytoplasmic dynein 1 heavy chain 1	1.009	1.049	1.026	1.053	1.07	1.032
STX1B_MOUSE	(P61264) Syntaxin-1B	0.997	0.987	1.014	1.034	1.018	0.999
GNAO_MOUSE	(P18872) Guanine nucleotide-binding protein G(o) subunit alpha	0.947	0.975	0.978	0.899	1.064	1.069
CH60_MOUSE	(P63038) 60 kDa heat shock protein, mitochondrial	0.916	0.93	0.699	0.966	0.881	0.794
DYN1_MOUSE	(P39053) Dynamin-1	1.032	1.068	1.061	1.061	1.059	1.079
DYN3_MOUSE	(Q8BZ98) Dynamin-3	1.068	1.016	1.029	1.076	1.056	1.084
DYN2_MOUSE	(P39054) Dynamin-2	1.071	1.018	1.019	1.072	1.058	1.087
ENOA_MOUSE	(P17182) Alpha-enolase	0.947	0.915	0.93	1.218	1.037	1.068
ENOG_MOUSE	(P17183) Gamma-enolase	1.067	1.014	0.995	1.139	1.041	1.055
TBB5_MOUSE	(P99024) Tubulin beta-5 chain	0.95	0.923	0.962	0.991	0.96	1.046
TBB3_MOUSE	(Q9ERD7) Tubulin beta-3 chain	0.937	0.888	0.952	0.983	0.949	1.031
TBB2A_MOUSE	(Q7TMM9) Tubulin beta-2A chain	0.95	0.924	0.961	0.992	0.958	1.044
TBB4A_MOUSE	(Q9D6F9) Tubulin beta-4A chain	1.053	0.939	0.936	1.011	1.025	1.01
VATE1_MOUSE	(P50518) V-type proton ATPase subunit E 1	1.065	0.945	1.084	1.2	1.015	1.031
STXB1_MOUSE	(O08599) Syntaxin-binding protein 1	0.946	0.973	0.945	0.997	1.072	1.016
1433Z_MOUSE	(P63101) 14-3-3 protein zeta/delta	1.004	0.955	1.026	1.095	1.018	1.067
MAP2_MOUSE	(P20357) Microtubule-associated protein 2	0.838	1.01	0.83	0.79	0.996	0.892
CLH1_MOUSE	(Q68FD5) Clathrin heavy chain 1	0.985	0.871	0.95	1.135	0.976	0.976
KCRU_MOUSE	(P30275) Creatine kinase U-type, mitochondrial	1.132	0.985	1.025	1.023	0.908	0.865
STX1A_MOUSE	(O35526) Syntaxin-1A	1.103	0.966	0.982	0.938	1.049	1.083
NSF_MOUSE	(P46460) Vesicle-fusing ATPase	1.002	0.977	1.069	0.981	1.074	1.043
ACON_MOUSE	(Q99KI0) Aconitate hydratase, mitochondrial	1.007	1.065	0.937	1.17	1.015	0.922
DPYL2_MOUSE	(O08553) Dihydropyrimidinase-related protein 2	1.005	0.962	0.987	1.047	0.986	1.191
DPYL3_MOUSE	(Q62188) Dihydropyrimidinase-related protein 3	0.943	0.895	0.867	1.063	0.991	1.1
DPYL1_MOUSE	(P97427) Dihydropyrimidinase-related protein 1	0.904	1	0.952	1.07	1.021	1.116
DPYL4_MOUSE	(O35098) Dihydropyrimidinase-related protein 4	0.966	1.014	1.067	1.179	1.028	1.169
VPP1_MOUSE	(Q9Z1G4) V-type proton ATPase 116 kDa subunit a isoform 1	1.121	0.786	1.016	1.158	1.063	1.01
VATA_MOUSE	(P50516) V-type proton ATPase catalytic subunit A	1.052	0.918	1.076	1.175	1.146	1.124
UBA1_MOUSE	(Q02053) Ubiquitin-like modifier-activating enzyme 1	0.967	0.935	1.032	1.172	1.03	1.13
SNP25_MOUSE	(P60879) Synaptosomal-associated protein 25	1.072	1.049	1.054	1.111	1.121	1.085
MYH10_MOUSE	(Q61879) Myosin-10	1.02	1.071	1.126	1.115	1.109	1.112
MYH9_MOUSE	(Q8VDD5) Myosin-9	0.824	1.078	0.92	0.945	0.885	0.927
DNM1L_MOUSE	(Q8K1M6) Dynamin-1-like protein	1.042	1.024	1.036	1.085	0.981	0.955
NDUS1_MOUSE	(Q91VD9) NADH-ubiquinone oxidoreductase 75 kDa subunit, mitochondrial	1.002	1.035	0.788	0.831	0.842	0.726
VAMP2_MOUSE	(P63044) Vesicle-associated membrane protein 2	1.008	1.052	1.256	1.278	1.086	1.061
VAMP1_MOUSE	(Q62442) Vesicle-associated membrane protein 1	1.037	1.122	1.319	1.315	1.059	1.062
1433E_MOUSE	(P62259) 14-3-3 protein epsilon	1.049	1.003	1.223	1.221	1.082	1.092
PYC_MOUSE	(Q05920) Pyruvate carboxylase, mitochondrial	1.122	1.028	0.907	1.061	0.925	0.845
ALDOC_MOUSE	(P05063) Fructose-bisphosphate aldolase C	0.92	0.949	1.101	1.293	1.166	1.123
BASP1_MOUSE	(Q91XV3) Brain acid soluble protein 1	0.989	1.069	0.922	1.002	1.187	1.173
DHSA_MOUSE	(Q8K2B3) Succinate dehydrogenase [ubiquinone] flavoprotein subunit, mitochondrial	0.956	0.921	0.919	1.019	0.965	0.884
1433G_MOUSE	(P61982) 14-3-3 protein gamma	0.959	1.118	0.888	1.087	1.004	1.013
1433B_MOUSE	(Q9CQV8) 14-3-3 protein beta/alpha	0.956	1.1	0.862	1.085	0.958	1.026
HSP7C_MOUSE	(P63017) Heat shock cognate 71 kDa protein	1.017	1.008	0.989	1.022	1.017	1.05
GRP78_MOUSE	(P20029) 78 kDa glucose-regulated protein	0.925	0.975	0.88	0.685	0.876	0.903
HSP72_MOUSE	(P17156) Heat shock-related 70 kDa protein 2	1.021	1.015	1.019	0.989	1.007	1.057
HS71A_MOUSE	(Q61696) Heat shock 70 kDa protein 1A	1.001	0.993	1.004	0.92	1.005	1.009
ODO2_MOUSE	(Q9D2G2) Dihydrolipoyllysine-residue succinyltransferase component of 2-oxoglutarate dehydrogenase complex, mitochondrial	0.988	1.048	0.873	1	0.884	0.855
VATB2_MOUSE	(P62814) V-type proton ATPase subunit B, brain isoform	0.925	0.827	0.883	1.001	0.888	0.824
GABT_MOUSE	(P61922) 4-aminobutyrate aminotransferase, mitochondrial	0.932	0.91	0.793	1.1	0.909	0.793
EFTU_MOUSE	(Q8BFR5) Elongation factor Tu, mitochondrial	0.949	1.013	0.872	1.044	0.953	0.86
ANK2_MOUSE	(Q8C8R3) Ankyrin-2	0.978	0.985	0.989	0.909	1.066	1.017
EAA2_MOUSE	(P43006) Excitatory amino acid transporter 2	1.063	0.791	1.033	0.839	1.009	0.811
MAP1A_MOUSE	(Q9QYR6) Microtubule-associated protein 1A	0.9	1.106	0.972	0.824	1.066	1.055
PPIA_MOUSE	(P17742) Peptidyl-prolyl cis-trans isomerase A	1.019	1.071	1.104	1.095	1.088	1.036
GSTM1_MOUSE	(P10649) Glutathione S-transferase Mu 1	1.032	1.026	1.228	1.418	1.41	1.403
TCPB_MOUSE	(P80314) T-complex protein 1 subunit beta	0.938	0.971	0.931	1.019	0.921	0.946
HS90A_MOUSE	(P07901) Heat shock protein HSP 90-alpha	0.958	0.982	0.824	1.045	0.904	0.924
HS90B_MOUSE	(P11499) Heat shock protein HSP 90-beta	0.963	0.986	0.806	0.994	0.935	0.929
ENPL_MOUSE	(P08113) Endoplasmin	0.952	1.055	0.88	0.653	0.907	0.937
TRAP1_MOUSE	(Q9CQN1) Heat shock protein 75 kDa, mitochondrial	0.969	0.948	0.746	1.058	0.892	0.92
DHE3_MOUSE	(P26443) Glutamate dehydrogenase 1, mitochondrial	0.869	0.994	0.796	1.213	0.961	0.836
RAB3A_MOUSE	(P63011) Ras-related protein Rab-3A	0.995	0.805	1.048	1.063	1.02	1.072
RAB3C_MOUSE	(P62823) Ras-related protein Rab-3C	1.058	0.69	1.104	1	1.018	1.013
RAP1A_MOUSE	(P62835) Ras-related protein Rap-1A	1.031	0.98	1.024	0.925	1.044	0.945
MDHC_MOUSE	(P14152) Malate dehydrogenase, cytoplasmic	1.146	1.118	1.023	1.214	1.107	1.019
PYGB_MOUSE	(Q8CI94) Glycogen phosphorylase, brain form	1.133	1.008	1.198	1.224	1.188	1.149
AT2A2_MOUSE	(O55143) Sarcoplasmic/endoplasmic reticulum calcium ATPase 2	0.994	1.001	0.99	0.85	0.971	0.975
GSTP1_MOUSE	(P19157) Glutathione S-transferase P 1	0.934	1.082	1.109	1.138	1.086	1.122
ALDOA_MOUSE	(P05064) Fructose-bisphosphate aldolase A	0.987	1.14	0.985	1.163	1.077	0.977
SAHH2_MOUSE	(Q80SW1) Putative adenosylhomocysteinase 2	0.962	0.989	0.895	0.952	0.894	0.95
PALM_MOUSE	(Q9Z0P4) Paralemmin-1	0.939	0.949	0.975	0.891	1.091	1.021
PRDX5_MOUSE	(P99029) Peroxiredoxin-5, mitochondrial	0.928	1.09	0.835	1.015	0.884	0.829
SV2B_MOUSE	(Q8BG39) Synaptic vesicle glycoprotein 2B	1.041	1.038	1.091	1.078	1.107	1.064
E41L3_MOUSE	(Q9WV92) Band 4.1-like protein 3	1.005	0.915	1.037	1.078	1.127	1.044
GPDM_MOUSE	(Q64521) Glycerol-3-phosphate dehydrogenase, mitochondrial	0.973	1.046	0.911	0.949	0.938	0.832
DCTN2_MOUSE	(Q99KJ8) Dynactin subunit 2	0.918	0.928	0.929	0.992	0.912	0.929
AT2B2_MOUSE	(Q9R0K7) Plasma membrane calcium-transporting ATPase 2	1.013	0.934	1.021	0.839	1.035	0.898
UCRI_MOUSE	(Q9CR68) Cytochrome b-c1 complex subunit Rieske, mitochondrial	0.859	1.459	0.922	0.788	0.96	0.855
TPM3_MOUSE	(P21107) Tropomyosin alpha-3 chain	0.842	1.261	0.91	0.782	0.917	0.807
TPM1_MOUSE	(P58771) Tropomyosin alpha-1 chain	0.772	1.031	0.878	0.75	0.887	1.009
PLCB1_MOUSE	(Q9Z1B3) 1-phosphatidylinositol 4,5-bisphosphate phosphodiesterase beta-1	1.019	1.051	1.052	0.928	1.065	1.026
NFASC_MOUSE	(Q810U3) Neurofascin	1.075	0.88	1.195	0.912	1.011	0.945
PHB_MOUSE	(P67778) Prohibitin	1.033	1.094	1.037	1.04	1.082	0.979
QCR1_MOUSE	(Q9CZ13) Cytochrome b-c1 complex subunit 1, mitochondrial	0.914	0.97	0.879	0.836	0.905	0.814
IMMT_MOUSE	(Q8CAQ8) Mitochondrial inner membrane protein	0.977	0.895	0.855	1.005	0.991	0.895
SUCB1_MOUSE	(Q9Z2I9) Succinyl-CoA ligase [ADP-forming] subunit beta, mitochondrial	0.91	0.925	0.771	0.934	0.941	0.81
AP2A1_MOUSE	(P17426) AP-2 complex subunit alpha-1	1.015	0.992	1.081	1.199	1.089	1.167
AP2A2_MOUSE	(P17427) AP-2 complex subunit alpha-2	1.031	0.989	1.094	1.218	1.105	1.166
SV2A_MOUSE	(Q9JIS5) Synaptic vesicle glycoprotein 2A	1.022	0.949	1.053	1.124	1.017	0.965
MDHM_MOUSE	(P08249) Malate dehydrogenase, mitochondrial	1.004	1.122	0.92	1.134	0.996	0.879
PRDX6_MOUSE	(O08709) Peroxiredoxin-6	0.782	0.79	0.687	0.837	1.01	0.877
OPA1_MOUSE	(P58281) Dynamin-like 120 kDa protein, mitochondrial	0.951	1.163	0.999	1.164	1.114	1.004
SPRE_MOUSE	(Q64105) Sepiapterin reductase	0.893	1.053	0.893	0.947	0.905	0.807
HSP74_MOUSE	(Q61316) Heat shock 70 kDa protein 4	1.035	1.048	0.985	1.067	0.985	0.996
SH3G2_MOUSE	(Q62420) Endophilin-A1	1.073	0.946	1.027	1.143	1.04	1.033
SH3G1_MOUSE	(Q62419) Endophilin-A2	1.073	0.949	1.061	1.102	1.021	1.021
DCTN1_MOUSE	(O08788) Dynactin subunit 1	0.996	0.993	1.055	1.084	1.009	1.052
KAP2_MOUSE	(P12367) cAMP-dependent protein kinase type II-alpha regulatory subunit	1.012	0.972	1.739	1.024	1.083	1.089
PCSK1_MOUSE	(Q9QXV0) ProSAAS	0.938	0.91	1.004	1.092	0.859	1.003
AMPH_MOUSE	(Q7TQF7) Amphiphysin	0.974	1.043	0.802	0.973	1.019	0.904
BIN1_MOUSE	(O08539) Myc box-dependent-interacting protein 1	1.084	1.117	0.675	0.907	1.066	0.767
IGSF8_MOUSE	(Q8R366) Immunoglobulin superfamily member 8	1.047	0.819	1.088	1.04	1.017	0.975
HS74L_MOUSE	(P48722) Heat shock 70 kDa protein 4L	1.03	0.994	1.008	1.05	0.924	0.993
AAK1_MOUSE	(Q3UHJ0) AP2-associated protein kinase 1	1.054	0.895	0.916	1.171	1.038	1.033
PCCA_MOUSE	(Q91ZA3) Propionyl-CoA carboxylase alpha chain, mitochondrial	0.938	1.054	0.946	1.028	0.889	0.821
SCOT1_MOUSE	(Q9D0K2) Succinyl-CoA:3-ketoacid coenzyme A transferase 1, mitochondrial	0.908	1.034	0.973	0.912	0.901	0.804
TENR_MOUSE	(Q8BYI9) Tenascin-R	0.884	1.144	1.02	0.871	1.224	1.021
ODO1_MOUSE	(Q60597) 2-oxoglutarate dehydrogenase, mitochondrial	0.961	1.058	0.928	1.07	0.918	0.822
AL1L1_MOUSE	(Q8R0Y6) Cytosolic 10-formyltetrahydrofolate dehydrogenase	0.957	0.96	1.009	1.083	1.091	1.034
GBB1_MOUSE	(P62874) Guanine nucleotide-binding protein G(I)/G(S)/G(T) subunit beta-1	1.05	0.798	1.017	0.982	1.118	1.252
GBB2_MOUSE	(P62880) Guanine nucleotide-binding protein G(I)/G(S)/G(T) subunit beta-2	1.047	0.973	1.154	0.957	1.14	1.16
SYNJ1_MOUSE	(Q8CHC4) Synaptojanin-1	1.018	0.978	1.01	1.066	1.09	1.003
NDUA9_MOUSE	(Q9DC69) NADH dehydrogenase [ubiquinone] 1 alpha subcomplex subunit 9, mitochondrial	1	1.049	0.761	0.773	0.836	0.765
HXK1_MOUSE	(P17710) Hexokinase-1	1.116	0.769	0.962	1.049	0.936	1.001
DMXL2_MOUSE	(Q8BPN8) DmX-like protein 2	1.049	0.954	1.027	1.076	1.048	1.018
PEBP1_MOUSE	(P70296) Phosphatidylethanolamine-binding protein 1	0.971	0.97	0.833	0.947	0.981	0.956
VDAC1_MOUSE	(Q60932) Voltage-dependent anion-selective channel protein 1	1.145	0.852	0.962	1.091	1.056	1.119
SYAC_MOUSE	(Q8BGQ7) Alanine--tRNA ligase, cytoplasmic	1.063	1.08	1.245	1.127	1.067	1.068
HS105_MOUSE	(Q61699) Heat shock protein 105 kDa	0.995	0.9	0.829	0.948	0.86	0.89
1433T_MOUSE	(P68254) 14-3-3 protein theta	1.077	0.834	1.042	1.061	0.958	1.057
TCPQ_MOUSE	(P42932) T-complex protein 1 subunit theta	1.013	0.945	0.955	1.02	0.975	0.955
DC1I1_MOUSE	(O88485) Cytoplasmic dynein 1 intermediate chain 1	1.051	1.025	0.986	1	0.983	1.091
GDIA_MOUSE	(P50396) Rab GDP dissociation inhibitor alpha	1.022	1.065	0.936	1.034	1.018	0.929
NCAM1_MOUSE	(P13595) Neural cell adhesion molecule 1	0.909	0.868	0.99	0.861	0.915	0.914
4F2_MOUSE	(P10852) 4F2 cell-surface antigen heavy chain	0.983	0.855	1.097	0.855	1.033	0.929
SEPT5_MOUSE	(Q9Z2Q6) Septin-5	1.143	0.85	1.01	1.241	1.113	1.236
PROF1_MOUSE	(P62962) Profilin-1	1.083	1.083	1.021	1.049	0.974	0.958
ODPB_MOUSE	(Q9D051) Pyruvate dehydrogenase E1 component subunit beta, mitochondrial	0.89	1.061	0.823	1.044	1.019	0.882
GRP75_MOUSE	(P38647) Stress-70 protein, mitochondrial	0.962	0.98	0.899	1.016	0.957	0.85
CISY_MOUSE	(Q9CZU6) Citrate synthase, mitochondrial	0.926	0.972	0.861	1.001	0.905	0.817
KPCG_MOUSE	(P63318) Protein kinase C gamma type	1.127	0.919	1.191	1.064	1.076	1.096
CAP1_MOUSE	(P40124) Adenylyl cyclase-associated protein 1	0.967	1.032	0.937	0.857	0.945	0.988
CDS2_MOUSE	(Q99L43) Phosphatidate cytidylyltransferase 2	1.125	1.207	1.326	0.902	1.168	1.039
HBB1_MOUSE	(P02088) Hemoglobin subunit beta-1	0.948	0.877	0.755	0.451	0.498	0.481
KIF5C_MOUSE	(P28738) Kinesin heavy chain isoform 5C	0.981	0.916	0.95	1.08	1.026	1
KINH_MOUSE	(Q61768) Kinesin-1 heavy chain	1.03	0.909	0.958	1.113	1.053	1.058
MAP1B_MOUSE	(P14873) Microtubule-associated protein 1B	0.884	1.055	0.953	0.866	1.073	1.01
NCDN_MOUSE	(Q9Z0E0) Neurochondrin	0.965	0.957	1.158	1.104	1.041	1.003
ATPD_MOUSE	(Q9D3D9) ATP synthase subunit delta, mitochondrial	1.002	1.06	0.914	1.067	0.904	0.816
AT5F1_MOUSE	(Q9CQQ7) ATP synthase subunit b, mitochondrial	0.88	0.817	0.773	1.003	0.932	0.818
NDUV2_MOUSE	(Q9D6J6) NADH dehydrogenase [ubiquinone] flavoprotein 2, mitochondrial	1.012	0.899	0.784	0.776	0.763	0.664
RAP2B_MOUSE	(P61226) Ras-related protein Rap-2b	1.002	1.061	1.11	0.97	1.115	1.088
RAP2A_MOUSE	(Q80ZJ1) Ras-related protein Rap-2a	1.044	1.006	1.034	0.983	1.063	1.099
RAP2C_MOUSE	(Q8BU31) Ras-related protein Rap-2c	0.992	0.972	1.134	1.004	1.105	1.115
TERA_MOUSE	(Q01853) Transitional endoplasmic reticulum ATPase	1.111	0.913	0.963	1.316	0.911	0.999
PACN1_MOUSE	(Q61644) Protein kinase C and casein kinase substrate in neurons protein 1	1.046	1.08	1.091	1.111	1.049	1.053
PACN2_MOUSE	(Q9WVE8) Protein kinase C and casein kinase substrate in neurons protein 2	1.006	1.026	1.078	1.068	1.057	1.013
VATG2_MOUSE	(Q9WTT4) V-type proton ATPase subunit G 2	1.03	1.032	1.081	1.081	1.044	1.012
PYGM_MOUSE	(Q9WUB3) Glycogen phosphorylase, muscle form	0.921	0.999	1.181	1.31	1.099	1.165
AP1B1_MOUSE	(O35643) AP-1 complex subunit beta-1	1.092	1.032	1.248	1.16	1.081	1.21
AP2B1_MOUSE	(Q9DBG3) AP-2 complex subunit beta	1.045	1.011	1.182	1.17	1.092	1.19
SCRN1_MOUSE	(Q9CZC8) Secernin-1	1.028	0.962	1.091	1.116	0.961	1.05
GRIN1_MOUSE	(Q3UNH4) G protein-regulated inducer of neurite outgrowth 1	1.052	1.024	1.119	0.832	1.116	1.035
SERA_MOUSE	(Q61753) D-3-phosphoglycerate dehydrogenase	0.92	0.987	0.958	1.007	1.009	0.978
TPPP_MOUSE	(Q7TQD2) Tubulin polymerization-promoting protein	0.928	0.919	0.937	0.906	0.869	0.894
NTRI_MOUSE	(Q99PJ0) Neurotrimin	1.077	0.802	0.941	0.823	0.878	0.888
CAP2_MOUSE	(Q9CYT6) Adenylyl cyclase-associated protein 2	1.072	0.99	1.078	1.028	0.953	1.075
MPP2_MOUSE	(Q9WV34) MAGUK p55 subfamily member 2	1.068	0.937	1.074	0.919	1.067	0.931
2AAA_MOUSE	(Q76MZ3) Serine/threonine-protein phosphatase 2A 65 kDa regulatory subunit A alpha isoform	0.972	1.047	1.008	1.062	0.981	0.989
AP2M1_MOUSE	(P84091) AP-2 complex subunit mu	1.014	1.218	1.014	1.408	1.053	1.162
PDIA1_MOUSE	(P09103) Protein disulfide-isomerase	0.917	0.899	0.819	0.665	0.9	0.867
CAMKV_MOUSE	(Q3UHL1) CaM kinase-like vesicle-associated protein	0.957	0.949	1.083	0.933	1.086	1.078
RHOA_MOUSE	(Q9QUI0) Transforming protein RhoA	1.003	0.995	1.128	0.997	1.021	1.213
RHOB_MOUSE	(P62746) Rho-related GTP-binding protein RhoB	1.003	0.997	1.18	1.018	1.043	1.235
NEUM_MOUSE	(P06837) Neuromodulin	0.895	0.905	0.834	0.862	0.928	0.88
CADM2_MOUSE	(Q8BLQ9) Cell adhesion molecule 2	1.141	0.742	1.135	0.88	0.959	0.861
ATCAY_MOUSE	(Q8BHE3) Caytaxin	1.014	0.888	0.873	0.907	0.895	0.927
ATPG_MOUSE	(Q91VR2) ATP synthase subunit gamma, mitochondrial	1.111	1.82	1.254	1.43	1.073	1.036
ARP2_MOUSE	(P61161) Actin-related protein 2	0.964	1.091	1.089	0.966	1.061	0.995
GNAI2_MOUSE	(P08752) Guanine nucleotide-binding protein G(i) subunit alpha-2	0.988	1.006	1.074	1.006	1.007	0.995
MAP6_MOUSE	(Q7TSJ2) Microtubule-associated protein 6	0.956	1	0.985	0.872	1.006	1.076
NDUA4_MOUSE	(Q62425) NADH dehydrogenase [ubiquinone] 1 alpha subcomplex subunit 4	0.999	0.864	0.625	0.561	0.656	0.55
CALX_MOUSE	(P35564) Calnexin	0.933	1.06	0.883	0.724	0.941	0.936
UBE2N_MOUSE	(P61089) Ubiquitin-conjugating enzyme E2 N	0.973	0.927	0.958	1.081	0.955	1.02
ANXA7_MOUSE	(Q07076) Annexin A7	0.894	0.83	0.937	0.95	0.903	0.996
LETM1_MOUSE	(Q9Z2I0) LETM1 and EF-hand domain-containing protein 1, mitochondrial	1.01	0.952	1.035	1.039	0.988	0.975
1433F_MOUSE	(P68510) 14-3-3 protein eta	0.924	0.899	0.845	0.972	0.945	0.967
SYIM_MOUSE	(Q8BIJ6) Isoleucine--tRNA ligase, mitochondrial	0.994	0.983	0.916	1.116	0.832	0.926
AKAP5_MOUSE	(D3YVF0) A-kinase anchor protein 5	0.935	1.031	0.926	0.932	1.122	0.979
PDIA3_MOUSE	(P27773) Protein disulfide-isomerase A3	0.939	1.037	0.849	0.646	0.932	0.92
CNTN1_MOUSE	(P12960) Contactin-1	1.048	0.932	1.124	0.971	1.094	0.941
ARFG1_MOUSE	(Q9EPJ9) ADP-ribosylation factor GTPase-activating protein 1	0.954	1.078	0.935	1.214	0.924	1.066
CALR_MOUSE	(P14211) Calreticulin	0.896	1.003	0.857	0.596	0.853	0.884
CMC1_MOUSE	(Q8BH59) Calcium-binding mitochondrial carrier protein Aralar1	0.964	1.146	0.975	1.072	0.932	1.041
CNDP2_MOUSE	(Q9D1A2) Cytosolic non-specific dipeptidase	1.1	1.09	0.986	1.038	0.951	1.051
K1045_MOUSE	(Q80TL4) Protein KIAA1045	1.091	1.317	1.062	1.139	1.154	1.119
PP2BB_MOUSE	(P48453) Serine/threonine-protein phosphatase 2B catalytic subunit beta isoform	1.041	0.986	1.078	1.124	1.079	1.051
PP2BA_MOUSE	(P63328) Serine/threonine-protein phosphatase 2B catalytic subunit alpha isoform	0.989	0.936	0.952	1.134	1.158	1.077
GDAP1_MOUSE	(O88741) Ganglioside-induced differentiation-associated protein 1	0.97	0.911	0.942	0.876	0.841	0.833
VATH_MOUSE	(Q8BVE3) V-type proton ATPase subunit H	0.939	4.97	1.053	1.146	0.892	0.986
VATF_MOUSE	(Q9D1K2) V-type proton ATPase subunit F	1.043	0.928	0.914	1.05	1.088	0.968
KCC2A_MOUSE	(P11798) Calcium/calmodulin-dependent protein kinase type II subunit alpha	1.224	0.727	1.075	1.069	1.085	1.086
KCC2D_MOUSE	(Q6PHZ2) Calcium/calmodulin-dependent protein kinase type II subunit delta	1.022	0.738	0.909	0.974	0.973	1.079
KCC2B_MOUSE	(P28652) Calcium/calmodulin-dependent protein kinase type II subunit beta	1.168	0.712	0.971	1.006	1.027	1.01
KCC2G_MOUSE	(Q923T9) Calcium/calmodulin-dependent protein kinase type II subunit gamma	1.119	0.699	0.956	0.983	0.976	1.017
PCP4_MOUSE	(P63054) Purkinje cell protein 4	0.97	0.924	0.931	0.989	0.888	0.885
ARF2_MOUSE	(Q8BSL7) ADP-ribosylation factor 2	1.055	1.256	1.194	1.26	1.1	1.198
SKP1_MOUSE	(Q9WTX5) S-phase kinase-associated protein 1	0.909	0.967	1.067	0.969	0.995	0.972
SODC_MOUSE	(P08228) Superoxide dismutase [Cu-Zn]	0.845	0.933	0.927	0.921	0.853	0.867
TAU_MOUSE	(P10637) Microtubule-associated protein tau	1.109	0.962	1.103	1.092	1.292	1.3
NDUB7_MOUSE	(Q9CR61) NADH dehydrogenase [ubiquinone] 1 beta subcomplex subunit 7	0.934	0.908	0.69	0.774	0.77	0.616
PDE2A_MOUSE	(Q922S4) cGMP-dependent 3',5'-cyclic phosphodiesterase	0.955	0.936	0.936	0.93	1.054	1.053
FKB1A_MOUSE	(P26883) Peptidyl-prolyl cis-trans isomerase FKBP1A	1.037	1.02	0.977	1.066	1.016	0.995
THIL_MOUSE	(Q8QZT1) Acetyl-CoA acetyltransferase, mitochondrial	0.855	0.828	0.766	0.892	0.902	0.746
RCN2_MOUSE	(Q8BP92) Reticulocalbin-2	0.842	0.914	0.893	0.726	0.785	0.937
ODPX_MOUSE	(Q8BKZ9) Pyruvate dehydrogenase protein X component, mitochondrial	0.983	1.045	1.032	1.163	0.895	0.975
SFXN3_MOUSE	(Q91V61) Sideroflexin-3	1.126	1.057	1.057	0.978	1.044	1.028
NDUAD_MOUSE	(Q9ERS2) NADH dehydrogenase [ubiquinone] 1 alpha subcomplex subunit 13	0.974	0.973	0.733	0.766	0.739	0.659
RASL1_MOUSE	(Q9Z268) RasGAP-activating-like protein 1	1.056	1.019	1.122	1.024	1.013	1.087
GUAD_MOUSE	(Q9R111) Guanine deaminase	1.047	1.069	1.071	1.125	0.978	1.074
ALDH2_MOUSE	(P47738) Aldehyde dehydrogenase, mitochondrial	1.002	1.216	0.785	1.133	0.924	0.889
CHCH6_MOUSE	(Q91VN4) Coiled-coil-helix-coiled-coil-helix domain-containing protein 6, mitochondrial	1.113	1.013	0.988	0.992	0.95	0.991
ETFB_MOUSE	(Q9DCW4) Electron transfer flavoprotein subunit beta	0.963	0.955	0.922	1.187	0.975	0.851
C1QBP_MOUSE	(O35658) Complement component 1 Q subcomponent-binding protein, mitochondrial	1.014	0.932	1.01	1.019	0.944	0.879
FAS_MOUSE	(P19096) Fatty acid synthase	0.995	0.984	0.899	0.979	0.903	0.888
STIP1_MOUSE	(Q60864) Stress-induced-phosphoprotein 1	0.978	0.946	0.937	0.888	0.91	0.871
ACLY_MOUSE	(Q91V92) ATP-citrate synthase	1.03	1.079	0.907	1.323	1.064	1.036
GBG2_MOUSE	(P63213) Guanine nucleotide-binding protein G(I)/G(S)/G(O) subunit gamma-2	0.985	0.948	1.188	0.892	1.063	1.066
NUCB1_MOUSE	(Q02819) Nucleobindin-1	0.938	1.076	1.015	0.544	0.912	0.889
SAHH3_MOUSE	(Q68FL4) Putative adenosylhomocysteinase 3	1.086	1.066	0.976	0.887	0.803	0.945
GSTM5_MOUSE	(P48774) Glutathione S-transferase Mu 5	1.135	1.116	1.32	1.465	1.435	1.531
SSDH_MOUSE	(Q8BWF0) Succinate-semialdehyde dehydrogenase, mitochondrial	0.944	0.798	0.912	1	0.895	0.79
UBP5_MOUSE	(P56399) Ubiquitin carboxyl-terminal hydrolase 5	1.037	1.009	1.055	1.136	1.004	1.045
RAB5C_MOUSE	(P35278) Ras-related protein Rab-5C	0.988	1.112	0.956	0.838	1.001	0.855
RAB5A_MOUSE	(Q9CQD1) Ras-related protein Rab-5A	1.042	1.134	0.893	0.898	0.901	0.835
RAB5B_MOUSE	(P61021) Ras-related protein Rab-5B	0.97	0.968	0.857	0.721	0.868	0.921
MBP_MOUSE	(P04370) Myelin basic protein	0.79	1.364	0.857	1.184	0.953	0.732
HPCA_MOUSE	(P84075) Neuron-specific calcium-binding protein hippocalcin	1.023	1.021	1.021	0.989	1.088	1.021
NCALD_MOUSE	(Q91X97) Neurocalcin-delta	1.08	1.047	1.164	0.876	1.054	0.976
NDUB6_MOUSE	(Q3UIU2) NADH dehydrogenase [ubiquinone] 1 beta subcomplex subunit 6	0.971	1.145	0.745	0.766	0.852	0.714
ADT1_MOUSE	(P48962) ADP/ATP translocase 1	1.165	1.053	1.05	0.882	1.068	0.913
PARK7_MOUSE	(Q99LX0) Protein DJ-1	1.069	1.009	1.056	1.166	1.05	1.032
NSF1C_MOUSE	(Q9CZ44) NSFL1 cofactor p47	1.108	1.034	1.077	1.163	0.99	1.091
FA49B_MOUSE	(Q921M7) Protein FAM49B	1.019	1.087	1.135	1.075	1.104	1.221
PRDX3_MOUSE	(P20108) Thioredoxin-dependent peroxide reductase, mitochondrial	1.053	1.173	0.919	1.133	0.982	0.865
ANXA6_MOUSE	(P14824) Annexin A6	1.057	1.02	0.996	0.862	0.894	0.907
ANK3_MOUSE	(G5E8K5) Ankyrin-3	1.088	0.98	1.291	0.966	1.087	1.109
CTNA2_MOUSE	(Q61301) Catenin alpha-2	1.124	0.941	1.087	1.011	1.003	0.976
NDUS2_MOUSE	(Q91WD5) NADH dehydrogenase [ubiquinone] iron-sulfur protein 2, mitochondrial	0.979	1.203	0.887	0.838	0.838	0.773
CAND1_MOUSE	(Q6ZQ38) Cullin-associated NEDD8-dissociated protein 1	0.945	1.026	1.046	1.077	1.037	1.086
VPS35_MOUSE	(Q9EQH3) Vacuolar protein sorting-associated protein 35	1.076	1.105	1.092	1.082	1.176	1.136
NDUS3_MOUSE	(Q9DCT2) NADH dehydrogenase [ubiquinone] iron-sulfur protein 3, mitochondrial	0.9	0.937	0.673	0.812	0.823	0.661
KAD1_MOUSE	(Q9R0Y5) Adenylate kinase isoenzyme 1	0.992	0.907	0.93	1.034	0.898	0.924
NDUBA_MOUSE	(Q9DCS9) NADH dehydrogenase [ubiquinone] 1 beta subcomplex subunit 10	1.079	1.115	0.933	0.88	0.834	0.739
ML12B_MOUSE	(Q3THE2) Myosin regulatory light chain 12B	0.964	1.1	0.979	1.183	1.055	1.117
SYNC_MOUSE	(Q8BP47) Asparagine--tRNA ligase, cytoplasmic	1.01	1.032	1.138	1.091	1.149	1.181
TM1L2_MOUSE	(Q5SRX1) TOM1-like protein 2	1.11	1.142	1.122	1.221	1.13	1.158
VISL1_MOUSE	(P62761) Visinin-like protein 1	1.016	1.042	0.957	1.016	0.999	0.958
LASP1_MOUSE	(Q61792) LIM and SH3 domain protein 1	0.975	1.263	1.037	1.003	1.099	1.03
S4A10_MOUSE	(Q5DTL9) Sodium-driven chloride bicarbonate exchanger	1.033	0.909	1.053	0.884	0.973	0.885
S4A8_MOUSE	(Q8JZR6) Electroneutral sodium bicarbonate exchanger 1	0.913	0.892	1.082	0.796	0.856	0.758
RTN3_MOUSE	(Q9ES97) Reticulon-3	0.95	0.87	0.883	0.795	0.949	0.989
CA095_MOUSE	(Q0VBF8) Uncharacterized membrane protein C1orf95 homolog	0.985	0.894	1.006	0.918	1.075	0.977
CLUS_MOUSE	(Q06890) Clusterin	1.057	1.079	1.042	0.827	1.091	1.084
PGK1_MOUSE	(P09411) Phosphoglycerate kinase 1	1.215	0.878	1.138	1.219	1.057	1.186
ADA22_MOUSE	(Q9R1V6) Disintegrin and metalloproteinase domain-containing protein 22	0.966	0.943	1.218	1.002	1.151	1.011
KAP3_MOUSE	(P31324) cAMP-dependent protein kinase type II-beta regulatory subunit	1	1.025	1.16	1.149	1.105	0.987
TLN2_MOUSE	(Q71LX4) Talin-2	1.069	1.032	1.109	1.053	1.12	1.203
TLN1_MOUSE	(P26039) Talin-1	1.079	1.144	1.243	0.974	1.173	1.15
ATP5I_MOUSE	(Q06185) ATP synthase subunit e, mitochondrial	0.863	0.994	0.9	1.085	0.876	0.874
LDHA_MOUSE	(P06151) L-lactate dehydrogenase A chain	1.072	0.91	1	1.128	0.999	1.11
LDHB_MOUSE	(P16125) L-lactate dehydrogenase B chain	0.976	0.956	1.003	1.094	1.043	1.079
REEP2_MOUSE	(Q8VCD6) Receptor expression-enhancing protein 2	0.941	1.1	1.074	0.876	1.032	1.047
E41L2_MOUSE	(O70318) Band 4.1-like protein 2	1.1	0.924	0.971	0.893	0.873	0.906
MAP4_MOUSE	(P27546) Microtubule-associated protein 4	0.937	0.914	1.083	0.896	0.842	0.926
TMX4_MOUSE	(Q8C0L0) Thioredoxin-related transmembrane protein 4	1.007	1.271	1.279	0.904	1.067	1.164
VATC1_MOUSE	(Q9Z1G3) V-type proton ATPase subunit C 1	1.079	1.085	1.23	1.182	1.185	1.117
SYT2_MOUSE	(P46097) Synaptotagmin-2	1.137	0.729	1.091	1.226	1.067	1.146
SYT5_MOUSE	(Q9R0N5) Synaptotagmin-5	1.131	0.743	1.091	1.201	1.074	1.164
NOL3_MOUSE	(Q9D1X0) Nucleolar protein 3	1.139	0.92	0.852	0.809	0.738	0.828
ROCK2_MOUSE	(P70336) Rho-associated protein kinase 2	0.981	1.042	0.906	1.005	0.982	1.065
PCCB_MOUSE	(Q99MN9) Propionyl-CoA carboxylase beta chain, mitochondrial	0.931	0.924	0.822	0.979	0.848	0.751
CADM1_MOUSE	(Q8R5M8) Cell adhesion molecule 1	1.127	0.957	1.28	1.028	1.24	1.094
GLSK_MOUSE	(D3Z7P3) Glutaminase kidney isoform, mitochondrial	1.042	1.164	0.964	0.904	0.958	0.834
C1TC_MOUSE	(Q922D8) C-1-tetrahydrofolate synthase, cytoplasmic	1.021	0.998	1.379	0.962	0.992	0.976
C1TM_MOUSE	(Q3V3R1) Monofunctional C1-tetrahydrofolate synthase, mitochondrial	0.923	0.985	1.005	1.05	0.96	0.912
GNAI1_MOUSE	(B2RSH2) Guanine nucleotide-binding protein G(i) subunit alpha-1	1.031	1.162	1.113	0.993	1.137	1.09
S12A5_MOUSE	(Q91V14) Solute carrier family 12 member 5	0.968	0.887	1.02	0.918	1.045	1.015
CN37_MOUSE	(P16330) 2',3'-cyclic-nucleotide 3'-phosphodiesterase	1.053	1.125	0.969	0.948	0.967	0.816
MOES_MOUSE	(P26041) Moesin	1.081	1.106	1.002	0.695	0.924	0.951
RADI_MOUSE	(P26043) Radixin	1.021	1.044	1.138	0.818	0.981	1.013
EZRI_MOUSE	(P26040) Ezrin	0.998	0.972	1.161	0.971	1.098	1.121
ANXA5_MOUSE	(P48036) Annexin A5	1.001	1.038	1.059	0.889	0.886	0.934
LYRIC_MOUSE	(Q80WJ7) Protein LYRIC	0.96	0.941	1.058	0.54	0.95	1.081
CAPS1_MOUSE	(Q80TJ1) Calcium-dependent secretion activator 1	1.105	1.766	1.014	1.071	1.012	1.043
RP3A_MOUSE	(P47708) Rabphilin-3A	1.022	0.991	1.031	0.976	0.925	0.931
ATP5J_MOUSE	(P97450) ATP synthase-coupling factor 6, mitochondrial	0.908	1.434	1.093	0.946	1.207	0.835
E41L1_MOUSE	(Q9Z2H5) Band 4.1-like protein 1	1.029	0.942	0.915	0.966	1.059	0.902
GNAZ_MOUSE	(O70443) Guanine nucleotide-binding protein G(z) subunit alpha	1.065	0.87	1.047	0.886	0.99	1.028
CPNE6_MOUSE	(Q9Z140) Copine-6	1.165	1.006	1.075	0.969	1.06	0.971
RRFM_MOUSE	(Q9D6S7) Ribosome-recycling factor, mitochondrial	0.867	0.938	0.746	0.861	0.826	0.677
CNTP1_MOUSE	(O54991) Contactin-associated protein 1	1.048	1.07	1.106	0.791	0.934	0.767
HS12A_MOUSE	(Q8K0U4) Heat shock 70 kDa protein 12A	0.9	0.971	1.026	0.972	1.055	1.044
LIPA3_MOUSE	(P60469) Liprin-alpha-3	1.048	0.984	0.997	1.042	1.023	1.004
THIO_MOUSE	(P10639) Thioredoxin	1.318	1.286	1.042	1.035	1.17	0.968
OXR1_MOUSE	(Q4KMM3) Oxidation resistance protein 1	1.022	1.002	1.055	1.144	1.05	1.074
TOLIP_MOUSE	(Q9QZ06) Toll-interacting protein	1.059	1.02	1.06	0.971	0.998	1.06
PDIA4_MOUSE	(P08003) Protein disulfide-isomerase A4	0.944	1.017	0.927	0.597	0.8	0.844
CYC_MOUSE	(P62897) Cytochrome c, somatic	0.864	0.821	0.885	1.211	1.061	0.914
EHD3_MOUSE	(Q9QXY6) EH domain-containing protein 3	1.06	1.047	1.104	1.173	1.167	1.223
EHD1_MOUSE	(Q9WVK4) EH domain-containing protein 1	1.076	1.111	1.202	1.236	1.303	1.215
G3P_MOUSE	(P16858) Glyceraldehyde-3-phosphate dehydrogenase	1.014	0.821	1.032	1.234	1.124	1.016
VTI1B_MOUSE	(O88384) Vesicle transport through interaction with t-SNAREs homolog 1B	1.107	0.992	1.066	0.667	0.816	0.846
MMSA_MOUSE	(Q9EQ20) Methylmalonate-semialdehyde dehydrogenase [acylating], mitochondrial	0.962	0.944	0.883	1.264	1.009	0.924
THIM_MOUSE	(Q8BWT1) 3-ketoacyl-CoA thiolase, mitochondrial	0.963	0.97	0.791	1.218	0.993	0.872
RAB10_MOUSE	(P61027) Ras-related protein Rab-10	0.874	0.961	1.016	0.906	0.802	1.014
COTL1_MOUSE	(Q9CQI6) Coactosin-like protein	0.955	1.097	1.197	1.004	1.085	1.085
MAON_MOUSE	(Q8BMF3) NADP-dependent malic enzyme, mitochondrial	1.044	1.046	0.975	1.105	0.888	0.954
MAOM_MOUSE	(Q99KE1) NAD-dependent malic enzyme, mitochondrial	1.027	1.069	0.981	1.124	0.902	0.961
TIM10_MOUSE	(P62073) Mitochondrial import inner membrane translocase subunit Tim10	0.906	0.909	0.917	0.83	0.949	0.812
HECAM_MOUSE	(Q640R3) Hepatocyte cell adhesion molecule	1.043	0.979	1.051	0.916	0.981	0.89
VA0D1_MOUSE	(P51863) V-type proton ATPase subunit d 1	1.06	0.681	1.063	1.08	1.139	0.979
KCD12_MOUSE	(Q6WVG3) BTB/POZ domain-containing protein KCTD12	0.937	1.089	0.978	0.732	0.845	0.841
NFL_MOUSE	(P08551) Neurofilament light polypeptide	0.829	1.137	0.86	0.855	1.156	0.842
AINX_MOUSE	(P46660) Alpha-internexin	0.908	1.146	0.946	0.871	1.18	0.89
NFM_MOUSE	(P08553) Neurofilament medium polypeptide	0.972	1.23	1.002	0.864	1.212	0.951
PGM1_MOUSE	(Q9D0F9) Phosphoglucomutase-1	1.014	0.987	1.151	1.155	1.116	1.109
AP180_MOUSE	(Q61548) Clathrin coat assembly protein AP180	0.968	1.025	0.822	1.114	1.153	1.135
APOE_MOUSE	(P08226) Apolipoprotein E	1.04	1.047	1.138	0.744	0.953	0.988
GP158_MOUSE	(Q8C419) Probable G-protein coupled receptor 158	0.97	0.889	1.218	0.885	0.966	0.91
AP3D1_MOUSE	(O54774) AP-3 complex subunit delta-1	1.024	0.852	1.005	1.001	1.114	1.082
WASF1_MOUSE	(Q8R5H6) Wiskott-Aldrich syndrome protein family member 1	0.904	1.07	0.992	0.985	1.119	1.122
WASF3_MOUSE	(Q8VHI6) Wiskott-Aldrich syndrome protein family member 3	1.067	1.254	1.066	1.081	1.282	1.225
ADDA_MOUSE	(Q9QYC0) Alpha-adducin	1.049	1.044	1.107	1.06	1.152	1.037
PI42B_MOUSE	(Q80XI4) Phosphatidylinositol 5-phosphate 4-kinase type-2 beta	0.898	0.916	0.939	0.965	1.016	0.998
BSN_MOUSE	(O88737) Protein bassoon	1.565	1.004	1.042	1.165	1.021	1.017
KAP0_MOUSE	(Q9DBC7) cAMP-dependent protein kinase type I-alpha regulatory subunit	1.11	1.075	1.066	1.097	1.217	1.188
RAB6A_MOUSE	(P35279) Ras-related protein Rab-6A	1.031	1.049	1.06	0.971	0.966	0.966
K1C10_MOUSE	(P02535) Keratin, type I cytoskeletal 10	0.12	0.272	0.077	0.448	0.448	0.139
SNAB_MOUSE	(P28663) Beta-soluble NSF attachment protein	1.007	0.975	0.949	0.941	1.072	0.982
GDIR1_MOUSE	(Q99PT1) Rho GDP-dissociation inhibitor 1	0.994	0.843	0.768	1.076	0.926	1.031
A4_MOUSE	(P12023) Amyloid beta A4 protein	0.88	1.025	1.089	0.692	0.907	1.018
LPPRC_MOUSE	(Q6PB66) Leucine-rich PPR motif-containing protein, mitochondrial	0.902	0.925	0.822	0.961	0.947	0.826
CANB1_MOUSE	(Q63810) Calcineurin subunit B type 1	0.991	1.093	0.81	1.173	1.031	1.069
ACTY_MOUSE	(Q8R5C5) Beta-centractin	0.919	1.017	1.091	1.016	1.028	1.052
ACTZ_MOUSE	(P61164) Alpha-centractin	0.929	1.013	1.123	1.003	0.983	1.048
EFTS_MOUSE	(Q9CZR8) Elongation factor Ts, mitochondrial	0.89	0.977	0.883	0.903	1.116	1.032
TIM44_MOUSE	(O35857) Mitochondrial import inner membrane translocase subunit TIM44	0.94	1.006	0.902	1.044	0.973	0.863
AATC_MOUSE	(P05201) Aspartate aminotransferase, cytoplasmic	1.031	1.016	1.085	1.21	1.034	1.146
PSA_MOUSE	(Q11011) Puromycin-sensitive aminopeptidase	0.918	1.002	0.933	0.981	1.051	0.99
STX6_MOUSE	(Q9JKK1) Syntaxin-6	0.998	0.97	1.125	0.837	1.007	1.021
SEPT7_MOUSE	(O55131) Septin-7	1.121	1.068	1.045	1.448	1.153	1.336
CSN8_MOUSE	(Q8VBV7) COP9 signalosome complex subunit 8	1.205	1.142	1.053	1.025	1.072	1.112
NDUB9_MOUSE	(Q9CQJ8) NADH dehydrogenase [ubiquinone] 1 beta subcomplex subunit 9	0.961	1.213	1.052	0.673	0.884	0.888
ASSY_MOUSE	(P16460) Argininosuccinate synthase	1.001	1.374	1.129	1.319	0.976	1.104
RPN1_MOUSE	(Q91YQ5) Dolichyl-diphosphooligosaccharide--protein glycosyltransferase subunit 1	0.939	0.995	0.87	0.615	0.92	0.992
CY1_MOUSE	(Q9D0M3) Cytochrome c1, heme protein, mitochondrial	0.883	0.847	0.8	0.883	0.991	0.897
SOGA3_MOUSE	(Q6NZL0) Protein SOGA3	1.047	1.009	1.002	0.971	1.093	1.037
LONM_MOUSE	(Q8CGK3) Lon protease homolog, mitochondrial	0.966	0.926	0.927	0.955	0.882	0.783
PHYIP_MOUSE	(Q8K0S0) Phytanoyl-CoA hydroxylase-interacting protein	0.983	0.945	1.005	1.041	0.892	1.026
DYL2_MOUSE	(Q9D0M5) Dynein light chain 2, cytoplasmic	0.767	0.826	0.899	0.839	1.118	0.863
EFHD2_MOUSE	(Q9D8Y0) EF-hand domain-containing protein D2	0.905	0.867	0.726	0.997	0.881	0.956
GDIB_MOUSE	(Q61598) Rab GDP dissociation inhibitor beta	1.111	0.922	0.996	0.956	0.892	1.1
KLC1_MOUSE	(O88447) Kinesin light chain 1	0.947	0.899	0.972	1.027	0.926	0.966
PURA_MOUSE	(P42669) Transcriptional activator protein Pur-alpha	1.233	1.011	1.368	1.002	1.544	1.691
RAB1A_MOUSE	(P62821) Ras-related protein Rab-1A	0.891	0.748	0.832	0.924	0.964	0.901
RAB1B_MOUSE	(Q9D1G1) Ras-related protein Rab-1B	0.845	0.733	0.8	0.867	0.854	0.881
S10A1_MOUSE	(P56565) Protein S100-A1	0.789	0.854	0.763	0.847	1.019	0.81
IF4A2_MOUSE	(P10630) Eukaryotic initiation factor 4A-II	0.926	0.97	1.005	0.95	0.95	1.015
SAP_MOUSE	(Q61207) Sulfated glycoprotein 1	1.048	1.431	1.186	1.071	1.158	1.088
DCE1_MOUSE	(P48318) Glutamate decarboxylase 1	1.024	0.813	0.985	1.103	0.983	0.924
PP1R7_MOUSE	(Q3UM45) Protein phosphatase 1 regulatory subunit 7	0.785	1.024	1.019	0.924	1.357	1.066
AP3B2_MOUSE	(Q9JME5) AP-3 complex subunit beta-2	1.232	1.272	1.166	1.125	1.19	1.095
AP3B1_MOUSE	(Q9Z1T1) AP-3 complex subunit beta-1	1.293	1.573	1.166	1.083	1.166	1.11
CAH2_MOUSE	(P00920) Carbonic anhydrase 2	0.831	0.672	0.735	0.84	0.647	0.654
CSPG5_MOUSE	(Q71M36) Chondroitin sulfate proteoglycan 5	1.058	0.913	1.028	0.87	0.947	0.83
RPN2_MOUSE	(Q9DBG6) Dolichyl-diphosphooligosaccharide--protein glycosyltransferase subunit 2	1.034	1.271	1.08	0.663	1.043	1.21
SEPT9_MOUSE	(Q80UG5) Septin-9	1.136	1.005	1.19	1.344	1.16	1.182
AQP4_MOUSE	(P55088) Aquaporin-4	1.11	0.923	1.044	0.718	0.83	0.622
SNAA_MOUSE	(Q9DB05) Alpha-soluble NSF attachment protein	0.987	1.078	1.093	0.941	1.08	1.058
K6PF_MOUSE	(P47857) 6-phosphofructokinase, muscle type	0.837	0.962	0.917	0.969	0.925	0.946
SC23A_MOUSE	(Q01405) Protein transport protein Sec23A	1.175	1.183	1.192	0.838	1.03	1
TY3H_MOUSE	(P24529) Tyrosine 3-monooxygenase	1.147	1.009	1.034	1.296	0.95	1.015
HPCL4_MOUSE	(Q8BGZ1) Hippocalcin-like protein 4	1.169	0.998	0.909	1.044	1.053	1.302
PPT1_MOUSE	(O88531) Palmitoyl-protein thioesterase 1	0.914	1.007	1.124	0.856	0.956	0.836
CLCB_MOUSE	(Q6IRU5) Clathrin light chain B	1.018	0.921	1.057	1.033	0.941	1.009
CLAP2_MOUSE	(Q8BRT1) CLIP-associating protein 2	1.108	1.247	0.947	0.999	1.175	0.956
RL40_MOUSE	(P62984) Ubiquitin-60S ribosomal protein L40	1.082	1.396	1.171	0.993	1.114	1.08
ECHB_MOUSE	(Q99JY0) Trifunctional enzyme subunit beta, mitochondrial	0.954	1.046	1.072	1.245	1.018	0.933
CC136_MOUSE	(Q3TVA9) Coiled-coil domain-containing protein 136	1.084	1.117	1.244	0.983	1.179	1.137
TPPP3_MOUSE	(Q9CRB6) Tubulin polymerization-promoting protein family member 3	0.93	0.957	1.01	1.049	1.033	1.075
PCBP2_MOUSE	(Q61990) Poly(rC)-binding protein 2	0.994	0.996	1.142	0.92	0.865	1.05
MTMR5_MOUSE	(Q6ZPE2) Myotubularin-related protein 5	0.919	0.786	0.817	0.97	0.858	1.005
SIR2_MOUSE	(Q8VDQ8) NAD-dependent protein deacetylase sirtuin-2	0.835	1.153	0.944	0.939	1.012	0.737
OGT1_MOUSE	(Q8CGY8) UDP-N-acetylglucosamine--peptide N-acetylglucosaminyltransferase 110 kDa subunit	1.079	1	1.098	1.257	0.995	1.019
VGLU1_MOUSE	(Q3TXX4) Vesicular glutamate transporter 1	1.005	0.791	0.843	1.046	1.122	1.044
KAD3_MOUSE	(Q9WTP7) GTP:AMP phosphotransferase, mitochondrial	1.135	1.123	0.962	1.333	1.049	0.907
EF2_MOUSE	(P58252) Elongation factor 2	1.124	1.099	1.01	1.071	1.099	1.136
RAB14_MOUSE	(Q91V41) Ras-related protein Rab-14	0.952	0.979	1.022	1.045	1.025	1.04
LGI1_MOUSE	(Q9JIA1) Leucine-rich glioma-inactivated protein 1	0.988	0.983	1.057	0.937	1.082	0.99
F10A1_MOUSE	(Q99L47) Hsc70-interacting protein	0.935	0.93	0.903	0.866	0.904	0.924
STX7_MOUSE	(O70439) Syntaxin-7	1.057	1.053	0.993	0.906	1.02	1.119
ITPR1_MOUSE	(P11881) Inositol 1,4,5-trisphosphate receptor type 1	1.045	0.945	1.013	0.873	1.034	1.082
GCSH_MOUSE	(Q91WK5) Glycine cleavage system H protein, mitochondrial	1.133	0.87	0.813	1.373	0.959	0.8
NNRD_MOUSE	(Q9CZ42) ATP-dependent (S)-NAD(P)H-hydrate dehydratase	0.988	1.151	1.027	0.98	1.072	0.997
GLRX5_MOUSE	(Q80Y14) Glutaredoxin-related protein 5, mitochondrial	0.926	0.977	0.851	0.965	0.837	0.829
ERMIN_MOUSE	(Q5EBJ4) Ermin	0.9	1.084	0.843	0.907	0.922	0.809
RM12_MOUSE	(Q9DB15) 39S ribosomal protein L12, mitochondrial	0.906	0.632	0.768	0.744	0.656	0.712
NCEH1_MOUSE	(Q8BLF1) Neutral cholesterol ester hydrolase 1	1.058	1.069	1.099	0.73	0.956	1.127
GNA13_MOUSE	(P27601) Guanine nucleotide-binding protein subunit alpha-13	1.139	0.976	1.216	1.132	1.162	1.218
PGAM1_MOUSE	(Q9DBJ1) Phosphoglycerate mutase 1	1.159	0.747	1.063	1.067	1.091	1.238
ENDD1_MOUSE	(Q8C522) Endonuclease domain-containing 1 protein	0.871	1.015	0.979	0.914	1.093	1.067
GMFB_MOUSE	(Q9CQI3) Glia maturation factor beta	0.953	0.901	0.938	1.013	0.876	0.947
NHRF1_MOUSE	(P70441) Na(+)/H(+) exchange regulatory cofactor NHE-RF1	1.14	0.862	1.024	0.77	0.945	0.917
PP2AA_MOUSE	(P63330) Serine/threonine-protein phosphatase 2A catalytic subunit alpha isoform	1.067	0.939	1.098	1.009	0.957	0.968
PP2AB_MOUSE	(P62715) Serine/threonine-protein phosphatase 2A catalytic subunit beta isoform	1.081	0.948	1.122	1.03	0.958	0.974
SCG2_MOUSE	(Q03517) Secretogranin-2	0.9	0.875	0.973	0.894	0.882	0.914
CATD_MOUSE	(P18242) Cathepsin D	1.084	1.324	1.246	0.997	1.023	1.125
GNAS1_MOUSE	(Q6R0H7) Guanine nucleotide-binding protein G(s) subunit alpha isoforms XLas	1.141	1.091	1.187	1.035	1.142	1.039
UB2V1_MOUSE	(Q9CZY3) Ubiquitin-conjugating enzyme E2 variant 1	0.903	0.861	0.897	0.935	0.911	0.984
DEST_MOUSE	(Q9R0P5) Destrin	1.538	1.058	1.543	1.24	1.337	1.431
GLU2B_MOUSE	(O08795) Glucosidase 2 subunit beta	0.959	1.07	0.931	0.675	0.861	0.911
SPN90_MOUSE	(Q9ESJ4) NCK-interacting protein with SH3 domain	0.921	1.036	1.114	1.008	1.009	1.039
CKAP4_MOUSE	(Q8BMK4) Cytoskeleton-associated protein 4	0.925	1.128	0.884	0.518	1.02	1.054
CNPY2_MOUSE	(Q9QXT0) Protein canopy homolog 2	0.924	0.955	0.884	0.646	0.817	0.856
CHMP6_MOUSE	(P0C0A3) Charged multivesicular body protein 6	1.07	1.09	1.227	1.066	0.983	0.984
TCPH_MOUSE	(P80313) T-complex protein 1 subunit eta	0.986	1.071	0.924	1.021	0.9	0.978
CYB5_MOUSE	(P56395) Cytochrome b5	1.532	0.912	1.095	0.927	1.62	1.637
MCCA_MOUSE	(Q99MR8) Methylcrotonoyl-CoA carboxylase subunit alpha, mitochondrial	0.97	1.042	0.852	1.014	0.982	0.856
MARCS_MOUSE	(P26645) Myristoylated alanine-rich C-kinase substrate	0.87	1.071	1.017	1.08	1.002	1.021
TCPA_MOUSE	(P11983) T-complex protein 1 subunit alpha	0.988	0.978	1.037	1.08	1.125	0.963
GNAQ_MOUSE	(P21279) Guanine nucleotide-binding protein G(q) subunit alpha	0.947	0.981	0.916	0.884	1.09	0.953
GNA11_MOUSE	(P21278) Guanine nucleotide-binding protein subunit alpha-11	0.956	0.901	0.983	0.995	1.055	0.981
ARF5_MOUSE	(P84084) ADP-ribosylation factor 5	1.098	1.059	1.206	1.2	1.145	1.155
STRN_MOUSE	(O55106) Striatin	0.663	2.384	1.177	0.998	0.904	0.686
SCAM1_MOUSE	(Q8K021) Secretory carrier-associated membrane protein 1	1.088	1.104	2.179	0.99	1.173	1.065
PRS6A_MOUSE	(O88685) 26S protease regulatory subunit 6A	1.041	0.944	0.953	1.07	1.026	0.967
PROF2_MOUSE	(Q9JJV2) Profilin-2	1.114	0.757	0.995	1.044	0.962	0.917
GEPH_MOUSE	(Q8BUV3) Gephyrin	1.028	1.069	1.091	1.089	1.057	1.026
PDE1B_MOUSE	(Q01065) Calcium/calmodulin-dependent 3',5'-cyclic nucleotide phosphodiesterase 1B	0.964	1.004	1.034	1.069	0.963	0.929
COR1A_MOUSE	(O89053) Coronin-1A	1.043	1.06	1.137	0.843	0.963	0.967
LYAG_MOUSE	(P70699) Lysosomal alpha-glucosidase	0.857	0.932	1.035	0.665	0.752	0.979
NDUS4_MOUSE	(Q9CXZ1) NADH dehydrogenase [ubiquinone] iron-sulfur protein 4, mitochondrial	0.93	1.057	0.684	0.702	0.707	0.631
WDR37_MOUSE	(Q8CBE3) WD repeat-containing protein 37	0.997	0.941	1.07	0.999	1.038	1.059
PDC6I_MOUSE	(Q9WU78) Programmed cell death 6-interacting protein	1.055	1.132	1.069	1.025	1.108	1.015
SFXN1_MOUSE	(Q99JR1) Sideroflexin-1	1.063	1.032	1.07	0.907	1.07	1.068
IF4H_MOUSE	(Q9WUK2) Eukaryotic translation initiation factor 4H	0.978	1.124	1.081	0.954	1.028	1.032
MAOX_MOUSE	(P06801) NADP-dependent malic enzyme	1.13	0.962	1.184	1.166	0.985	1.045
CLYBL_MOUSE	(Q8R4N0) Citrate lyase subunit beta-like protein, mitochondrial	1.014	1.031	1.23	1.287	1.031	1.045
MK01_MOUSE	(P63085) Mitogen-activated protein kinase 1	0.965	1.148	1.1	1.077	1.154	1.036
MK03_MOUSE	(Q63844) Mitogen-activated protein kinase 3	0.972	0.937	1.831	0.941	0.996	0.996
TPRGL_MOUSE	(Q9DBS2) Tumor protein p63-regulated gene 1-like protein	0.909	0.99	1.083	1.195	0.962	0.894
SUGT1_MOUSE	(Q9CX34) Suppressor of G2 allele of SKP1 homolog	1.043	1.167	0.825	0.974	1.015	1.108
ADDB_MOUSE	(Q9QYB8) Beta-adducin	0.974	0.932	0.954	0.967	1.098	1.037
PEX5R_MOUSE	(Q8C437) PEX5-related protein	1.077	0.957	2.003	0.983	1.067	1.072
LNEBL_MOUSE	(Q9DC07) LIM zinc-binding domain-containing Nebulette	1.113	1.06	0.951	1.156	1.135	1.068
PIPNA_MOUSE	(P53810) Phosphatidylinositol transfer protein alpha isoform	0.942	1.083	1.068	1.161	0.972	1.066
ITPA_MOUSE	(Q9D892) Inosine triphosphate pyrophosphatase	0.987	0.799	1.006	1.022	0.898	0.994
RTN4_MOUSE	(Q99P72) Reticulon-4	0.975	1.017	0.892	0.938	1.066	1.018
LRP1_MOUSE	(Q91ZX7) Prolow-density lipoprotein receptor-related protein 1	1.043	1.136	1.134	0.911	0.953	1.219
TOM6_MOUSE	(Q9CQN3) Mitochondrial import receptor subunit TOM6 homolog	1.034	2.324	1.227	0.99	1.037	1.137
MCCB_MOUSE	(Q3ULD5) Methylcrotonoyl-CoA carboxylase beta chain, mitochondrial	0.968	0.921	0.945	1.057	0.973	0.839
RS14_MOUSE	(P62264) 40S ribosomal protein S14	1.089	0.93	1.074	0.591	0.998	1.244
AK1A1_MOUSE	(Q9JII6) Alcohol dehydrogenase [NADP(+)]	1.065	1.06	1.335	1.237	1.062	1.153
HEMH_MOUSE	(P22315) Ferrochelatase, mitochondrial	1.256	1.22	1.23	1.093	1.308	1.26
CNTN2_MOUSE	(Q61330) Contactin-2	1.048	1.015	1	1.045	1.052	0.974
CLPP_MOUSE	(O88696) Putative ATP-dependent Clp protease proteolytic subunit, mitochondrial	0.938	0.962	1.289	0.982	0.951	0.74
BPHL_MOUSE	(Q8R164) Valacyclovir hydrolase	0.94	0.947	1.025	1.048	0.982	0.887
ACOT9_MOUSE	(Q9R0X4) Acyl-coenzyme A thioesterase 9, mitochondrial	1.149	0.949	2.626	0.934	1.18	1.014
TCAL5_MOUSE	(Q8CCT4) Transcription elongation factor A protein-like 5	0.997	1.094	1.029	0.907	0.902	0.935
SYN2_MOUSE	(Q64332) Synapsin-2	0.944	0.86	1.086	0.959	1.038	0.947
SYN3_MOUSE	(Q8JZP2) Synapsin-3	0.947	0.867	1.075	0.997	1.066	0.966
LGMN_MOUSE	(O89017) Legumain	0.769	1.129	1.054	0.598	0.801	0.726
CEND_MOUSE	(Q9JKC6) Cell cycle exit and neuronal differentiation protein 1	0.873	1.202	0.995	0.874	0.937	0.817
3HIDH_MOUSE	(Q99L13) 3-hydroxyisobutyrate dehydrogenase, mitochondrial	0.996	0.924	0.882	1.222	0.975	0.942
KCC1D_MOUSE	(Q8BW96) Calcium/calmodulin-dependent protein kinase type 1D	1.073	0.94	0.866	1.055	0.969	0.995
RUFY3_MOUSE	(Q9D394) Protein RUFY3	1.002	0.959	0.953	1.164	0.979	1.091
TCPZ_MOUSE	(P80317) T-complex protein 1 subunit zeta	1.019	1.044	0.945	0.969	1.03	0.986
PFD3_MOUSE	(P61759) Prefoldin subunit 3	0.876	0.964	0.828	0.93	0.931	0.999
GRPE1_MOUSE	(Q99LP6) GrpE protein homolog 1, mitochondrial	0.921	0.954	0.802	0.952	0.938	0.769
ACADV_MOUSE	(P50544) Very long-chain specific acyl-CoA dehydrogenase, mitochondrial	0.9	1.051	0.821	1.204	0.95	0.915
ADDG_MOUSE	(Q9QYB5) Gamma-adducin	1.021	0.979	0.919	0.931	0.994	1.016
MPP6_MOUSE	(Q9JLB0) MAGUK p55 subfamily member 6	1.049	0.854	1.017	0.907	0.927	0.942
GRM5_MOUSE	(Q3UVX5) Metabotropic glutamate receptor 5	1.127	1.031	1.217	0.981	1.026	1.063
ATLA1_MOUSE	(Q8BH66) Atlastin-1	1.005	0.957	1.021	1.13	1.138	1.227
RAB6B_MOUSE	(P61294) Ras-related protein Rab-6B	1.063	1.052	1.071	1.018	0.963	0.96
NCAM2_MOUSE	(O35136) Neural cell adhesion molecule 2	1.069	0.883	1.052	0.841	0.929	0.902
VATG1_MOUSE	(Q9CR51) V-type proton ATPase subunit G 1	0.991	0.983	1.084	1.161	1.062	1.086
PRDX2_MOUSE	(Q61171) Peroxiredoxin-2	0.932	0.953	1.079	1.06	0.967	1.028
SEPT3_MOUSE	(Q9Z1S5) Neuronal-specific septin-3	1.024	0.865	0.851	1.396	1.064	1.133
CLIP2_MOUSE	(Q9Z0H8) CAP-Gly domain-containing linker protein 2	0.985	0.833	1.093	0.692	1.178	1.126
ACBG1_MOUSE	(Q99PU5) Long-chain-fatty-acid--CoA ligase ACSBG1	0.974	0.865	1.015	0.982	1.007	1.051
ASGL1_MOUSE	(Q8C0M9) Isoaspartyl peptidase/L-asparaginase	0.961	1.98	0.909	1.013	0.898	0.953
BCAS3_MOUSE	(Q8CCN5) Breast carcinoma-amplified sequence 3 homolog	1	0.917	1.009	1.045	0.968	1.03
RYR2_MOUSE	(E9Q401) Ryanodine receptor 2	1.005	1.122	1.096	0.947	1.044	1.066
GNAL_MOUSE	(Q8CGK7) Guanine nucleotide-binding protein G(olf) subunit alpha	0.843	0.901	0.794	0.895	0.933	0.776
LAT1_MOUSE	(Q9Z127) Large neutral amino acids transporter small subunit 1	0.688	1.063	1.109	0.936	0.904	1.078
FMN2_MOUSE	(Q9JL04) Formin-2	1.303	1.154	1.015	1.279	1.209	1.047
COX2_MOUSE	(P00405) Cytochrome c oxidase subunit 2	1.001	0.967	0.653	0.536	0.67	0.59
CDC42_MOUSE	(P60766) Cell division control protein 42 homolog	0.99	0.89	0.893	0.909	0.997	0.888
ALG2_MOUSE	(Q9DBE8) Alpha-1,3/1,6-mannosyltransferase ALG2	0.915	0.977	1.044	0.94	0.975	1.168
DDAH1_MOUSE	(Q9CWS0) N(G),N(G)-dimethylarginine dimethylaminohydrolase 1	1.161	1.06	1.022	1.073	1.034	1.038
TKT_MOUSE	(P40142) Transketolase	1.385	1.247	0.952	0.945	0.855	1.029
ENSA_MOUSE	(P60840) Alpha-endosulfine	0.903	1.096	0.857	0.962	1.014	1.005
OCAD1_MOUSE	(Q9CRD0) OCIA domain-containing protein 1	0.909	0.975	0.791	0.971	0.977	0.935
FSCN1_MOUSE	(Q61553) Fascin	1.032	1.024	1.006	0.908	1.061	0.95
RAB4B_MOUSE	(Q91ZR1) Ras-related protein Rab-4B	0.993	0.95	1.004	0.965	0.981	0.995
KPCE_MOUSE	(P16054) Protein kinase C epsilon type	1.112	0.992	1.11	1.085	1.294	1.102
ASTN1_MOUSE	(Q61137) Astrotactin-1	1.294	0.866	1.109	1.147	1.224	1.158
PHB2_MOUSE	(O35129) Prohibitin-2	1.001	1.039	1.046	1.043	1.041	0.98
BCAT1_MOUSE	(P24288) Branched-chain-amino-acid aminotransferase, cytosolic	1.085	1.064	1.412	0.944	0.801	0.792
ARP3_MOUSE	(Q99JY9) Actin-related protein 3	1.058	1.032	1.041	1.048	1.088	1.015
ARP3B_MOUSE	(Q641P0) Actin-related protein 3B	0.998	1.081	1.028	1.011	0.953	0.961
NLGN3_MOUSE	(Q8BYM5) Neuroligin-3	1.067	0.952	0.943	1.027	0.913	1.009
CP46A_MOUSE	(Q9WVK8) Cholesterol 24-hydroxylase	0.999	1.096	1.284	0.847	0.979	1.039
RAB3B_MOUSE	(Q9CZT8) Ras-related protein Rab-3B	0.992	0.836	0.957	1.106	1.171	1.185
AL3A2_MOUSE	(P47740) Fatty aldehyde dehydrogenase	0.961	1.002	0.992	0.844	0.915	0.972
TCPD_MOUSE	(P80315) T-complex protein 1 subunit delta	0.998	0.992	0.99	1.092	0.943	0.973
MTPN_MOUSE	(P62774) Myotrophin	1.045	0.947	0.909	1.104	1.056	0.964
GHC1_MOUSE	(Q9D6M3) Mitochondrial glutamate carrier 1	1.042	0.91	1.091	0.761	0.915	0.858
ABCB8_MOUSE	(Q9CXJ4) ATP-binding cassette sub-family B member 8, mitochondrial	0.947	1.103	0.934	0.9	0.949	0.978
RS28_MOUSE	(P62858) 40S ribosomal protein S28	0.82	0.892	0.92	0.658	0.899	1.063
CA2D1_MOUSE	(O08532) Voltage-dependent calcium channel subunit alpha-2/delta-1	1.077	0.877	1.08	0.948	0.908	0.874
CA2D2_MOUSE	(Q6PHS9) Voltage-dependent calcium channel subunit alpha-2/delta-2	0.998	0.944	1.126	0.786	0.898	0.811
PDIA6_MOUSE	(Q922R8) Protein disulfide-isomerase A6	0.892	0.919	0.868	0.554	0.801	0.893
THIKA_MOUSE	(Q921H8) 3-ketoacyl-CoA thiolase A, peroxisomal	0.778	0.796	0.763	0.85	0.847	0.81
EFR3B_MOUSE	(Q6ZQ18) Protein EFR3 homolog B	0.923	1.062	1.053	1.021	1.093	1.039
K2C5_MOUSE	(Q922U2) Keratin, type II cytoskeletal 5	0.173	0.385	0.068	0.563	0.401	0.098
AIFM1_MOUSE	(Q9Z0X1) Apoptosis-inducing factor 1, mitochondrial	1.053	1.171	1.001	1.017	1.006	0.929
NUDT3_MOUSE	(Q9JI46) Diphosphoinositol polyphosphate phosphohydrolase 1	1.01	0.927	1.005	1.057	0.941	0.974
COQ9_MOUSE	(Q8K1Z0) Ubiquinone biosynthesis protein COQ9, mitochondrial	1.092	1.063	1.146	1.052	1.066	0.809
SYSC_MOUSE	(P26638) Serine--tRNA ligase, cytoplasmic	0.966	1.006	1.036	0.997	0.983	1.046
GLOD4_MOUSE	(Q9CPV4) Glyoxalase domain-containing protein 4	0.945	0.838	0.842	0.938	0.925	0.88
RLA2_MOUSE	(P99027) 60S acidic ribosomal protein P2	0.926	0.882	0.931	0.657	0.913	1.149
TCPG_MOUSE	(P80318) T-complex protein 1 subunit gamma	1.02	0.987	0.992	0.943	0.922	0.937
ECHA_MOUSE	(Q8BMS1) Trifunctional enzyme subunit alpha, mitochondrial	0.876	0.743	0.894	1.032	0.914	0.794
LRC47_MOUSE	(Q505F5) Leucine-rich repeat-containing protein 47	0.988	1.027	1.057	1.045	0.978	1.052
NUDC_MOUSE	(O35685) Nuclear migration protein nudC	0.945	1.005	0.918	0.915	0.89	0.889
SPTB1_MOUSE	(P15508) Spectrin beta chain, erythrocytic	1.048	1.114	1.028	1.036	1.008	0.987
DHSB_MOUSE	(Q9CQA3) Succinate dehydrogenase [ubiquinone] iron-sulfur subunit, mitochondrial	0.975	0.942	1.044	1.03	0.934	0.849
C2C2L_MOUSE	(Q80X80) C2 domain-containing protein 2-like	0.962	1.04	1.036	1.01	0.918	0.989
ACOC_MOUSE	(P28271) Cytoplasmic aconitate hydratase	1.055	1.108	1.024	1.204	0.967	1.111
AL7A1_MOUSE	(Q9DBF1) Alpha-aminoadipic semialdehyde dehydrogenase	1.131	1.1	0.937	1.333	1.102	1.081
SYJ2B_MOUSE	(Q9D6K5) Synaptojanin-2-binding protein	1.139	1.014	0.971	0.916	0.821	0.876
EP15R_MOUSE	(Q60902) Epidermal growth factor receptor substrate 15-like 1	0.999	1.081	1.207	1.019	1.068	1.006
RD23B_MOUSE	(P54728) UV excision repair protein RAD23 homolog B	0.99	0.909	0.903	1.12	1.044	1.027
CD166_MOUSE	(Q61490) CD166 antigen	1.283	0.979	0.927	0.936	1.057	0.949
2ABA_MOUSE	(Q6P1F6) Serine/threonine-protein phosphatase 2A 55 kDa regulatory subunit B alpha isoform	0.98	1.037	1.003	0.962	0.998	0.978
2ABG_MOUSE	(Q8BG02) Serine/threonine-protein phosphatase 2A 55 kDa regulatory subunit B gamma isoform	1.013	1.037	1.085	0.98	1.017	1.016
CSN7A_MOUSE	(Q9CZ04) COP9 signalosome complex subunit 7a	0.976	1.024	0.927	1.073	0.994	1.03
DHPR_MOUSE	(Q8BVI4) Dihydropteridine reductase	1.152	1.494	1.275	1.012	1.35	1.133
RT14_MOUSE	(Q9CR88) 28S ribosomal protein S14, mitochondrial	1.432	1.107	1.243	1.105	1.192	1.346
NECP1_MOUSE	(Q9CR95) Adaptin ear-binding coat-associated protein 1	1.097	0.965	1.024	1.196	1.04	1.025
EMC8_MOUSE	(O70378) ER membrane protein complex subunit 8	1.038	1.107	0.927	0.821	1.038	1.069
MTX1_MOUSE	(P47802) Metaxin-1	1.028	1.193	1.066	0.932	1.121	1.065
RL14_MOUSE	(Q9CR57) 60S ribosomal protein L14	1.018	1.181	1.225	0.66	1.007	1.28
RGS7_MOUSE	(O54829) Regulator of G-protein signaling 7	1.114	1.168	1.258	1.104	1.179	1.162
PRVA_MOUSE	(P32848) Parvalbumin alpha	1.272	0.992	1.468	1.421	1.109	1.129
SNP47_MOUSE	(Q8R570) Synaptosomal-associated protein 47	0.955	0.992	0.861	0.88	0.978	0.89
PLXA1_MOUSE	(P70206) Plexin-A1	1.149	0.982	1.134	1.013	1.09	1.033
PLXA4_MOUSE	(Q80UG2) Plexin-A4	1.005	1.08	1.098	0.968	1.092	1.037
CAF17_MOUSE	(Q8CAK1) Putative transferase CAF17 homolog, mitochondrial	0.908	1.011	0.817	0.878	0.779	0.825
RINI_MOUSE	(Q91VI7) Ribonuclease inhibitor	0.992	1.026	0.931	1.091	0.864	0.957
AP1S1_MOUSE	(P61967) AP-1 complex subunit sigma-1A	1.059	1.056	1.132	0.937	0.897	0.974
DLDH_MOUSE	(O08749) Dihydrolipoyl dehydrogenase, mitochondrial	0.976	1.334	0.645	1.091	0.847	0.805
MFF_MOUSE	(Q6PCP5) Mitochondrial fission factor	1.022	0.989	0.905	0.888	0.985	1.022
CBR1_MOUSE	(P48758) Carbonyl reductase [NADPH] 1	0.922	0.83	1.025	1.403	1.262	1.339
ETFD_MOUSE	(Q921G7) Electron transfer flavoprotein-ubiquinone oxidoreductase, mitochondrial	1.112	1.377	0.915	1.25	1.103	0.88
DBNL_MOUSE	(Q62418) Drebrin-like protein	0.923	0.965	0.97	0.889	0.89	0.881
USO1_MOUSE	(Q9Z1Z0) General vesicular transport factor p115	1.003	1.057	1.085	0.839	1.034	0.971
ANK1_MOUSE	(Q02357) Ankyrin-1	1.156	0.859	1.153	1.077	1.048	1.04
THNS1_MOUSE	(Q8BH55) Threonine synthase-like 1	0.951	1.099	0.899	1.111	0.927	0.837
AUXI_MOUSE	(Q80TZ3) Putative tyrosine-protein phosphatase auxilin	1.057	0.966	1.072	1.124	1.004	1.034
ODPA_MOUSE	(P35486) Pyruvate dehydrogenase E1 component subunit alpha, somatic form, mitochondrial	1.015	1.226	1.136	1.154	1.065	0.965
QCR7_MOUSE	(Q9D855) Cytochrome b-c1 complex subunit 7	0.989	1.131	0.827	0.904	1.086	0.923
CHP1_MOUSE	(P61022) Calcineurin B homologous protein 1	1.126	0.713	1.436	1.244	1.012	1.21
CSTN1_MOUSE	(Q9EPL2) Calsyntenin-1	1.003	0.939	0.861	0.631	0.847	0.763
CD81_MOUSE	(P35762) CD81 antigen	1.125	0.885	0.876	1.024	1.117	1.079
LSAMP_MOUSE	(Q8BLK3) Limbic system-associated membrane protein	0.968	0.834	1.007	0.962	1.136	0.92
AATM_MOUSE	(P05202) Aspartate aminotransferase, mitochondrial	1.062	0.862	0.813	1.019	0.984	1.018
S6A17_MOUSE	(Q8BJI1) Sodium-dependent neutral amino acid transporter SLC6A17	0.951	0.815	1.096	0.922	1.016	1.028
NLGN2_MOUSE	(Q69ZK9) Neuroligin-2	1.023	0.901	1.159	1.01	0.936	1.058
G6PI_MOUSE	(P06745) Glucose-6-phosphate isomerase	0.921	0.959	1.045	1.164	1.096	1.118
IVD_MOUSE	(Q9JHI5) Isovaleryl-CoA dehydrogenase, mitochondrial	0.9	1.014	0.91	1.184	0.973	0.918
INP4A_MOUSE	(Q9EPW0) Type I inositol 3,4-bisphosphate 4-phosphatase	1.062	1.155	1.183	1.132	1.161	1.162
PDK3_MOUSE	(Q922H2) [Pyruvate dehydrogenase [lipoamide]] kinase isozyme 3, mitochondrial	0.861	1.014	1.05	1.086	0.937	1.003
PLPP_MOUSE	(P60487) Pyridoxal phosphate phosphatase	0.986	0.825	1.067	1.095	1.071	1.073
COF1_MOUSE	(P18760) Cofilin-1	1.056	1.066	0.778	1.088	1.011	0.894
CTND2_MOUSE	(O35927) Catenin delta-2	1.049	0.804	0.95	0.996	0.975	1.018
ARSB_MOUSE	(P50429) Arylsulfatase B	1.034	1.301	1.065	0.714	0.924	0.986
PRAF2_MOUSE	(Q9JIG8) PRA1 family protein 2	1.09	0.965	1.004	0.889	0.975	1.026
CC50A_MOUSE	(Q8VEK0) Cell cycle control protein 50A	0.916	1.161	1.259	0.995	1.032	0.987
AL4A1_MOUSE	(Q8CHT0) Delta-1-pyrroline-5-carboxylate dehydrogenase, mitochondrial	0.505	0.577	0.446	0.276	0.533	0.617
PRS7_MOUSE	(P46471) 26S protease regulatory subunit 7	1.034	0.855	0.956	1.083	0.983	1.03
NDUS8_MOUSE	(Q8K3J1) NADH dehydrogenase [ubiquinone] iron-sulfur protein 8, mitochondrial	0.877	0.877	0.644	0.724	0.791	0.668
SRGP3_MOUSE	(Q812A2) SLIT-ROBO Rho GTPase-activating protein 3	1.097	1.211	1.116	1.166	1.25	1.202
STX16_MOUSE	(Q8BVI5) Syntaxin-16	0.989	0.858	1.169	0.831	0.96	1.019
SCPDL_MOUSE	(Q8R127) Saccharopine dehydrogenase-like oxidoreductase	0.991	0.904	0.874	0.887	0.817	0.829
B2L13_MOUSE	(P59017) Bcl-2-like protein 13	1.018	0.888	0.937	0.929	0.84	0.82
FABD_MOUSE	(Q8R3F5) Malonyl-CoA-acyl carrier protein transacylase, mitochondrial	0.92	1.124	0.984	0.949	0.993	1.048
NRX3A_MOUSE	(Q6P9K9) Neurexin-3	1.159	1.068	1.23	1.039	0.983	0.909
RAB7A_MOUSE	(P51150) Ras-related protein Rab-7a	1.004	1.096	1.049	0.959	0.993	1.042
ACTN1_MOUSE	(Q7TPR4) Alpha-actinin-1	0.978	1.216	1.387	0.912	1.154	1.139
PRIO_MOUSE	(P04925) Major prion protein	1.041	0.993	1.077	0.824	1.036	0.997
NEUG_MOUSE	(P60761) Neurogranin	0.997	0.801	1.366	1.289	1.037	1.338
DNJB1_MOUSE	(Q9QYJ3) DnaJ homolog subfamily B member 1	1.082	0.873	1.061	1.061	1.055	0.981
VDAC2_MOUSE	(Q60930) Voltage-dependent anion-selective channel protein 2	2.605	2.159	2.361	1.167	0.863	1.433
PCKGM_MOUSE	(Q8BH04) Phosphoenolpyruvate carboxykinase [GTP], mitochondrial	0.991	0.995	1.065	1.196	0.954	0.901
CDC37_MOUSE	(Q61081) Hsp90 co-chaperone Cdc37	0.959	1.009	0.8	0.978	0.924	0.926
SYWC_MOUSE	(P32921) Tryptophan--tRNA ligase, cytoplasmic	0.91	1.045	0.943	0.999	0.876	0.965
GD1L1_MOUSE	(Q8VE33) Ganglioside-induced differentiation-associated protein 1-like 1	0.877	0.988	1.099	1.109	0.968	1.097
TMEDA_MOUSE	(Q9D1D4) Transmembrane emp24 domain-containing protein 10	1.5	1.521	1.589	0.641	0.902	1.058
FBX2_MOUSE	(Q80UW2) F-box only protein 2	0.985	0.969	1.148	1.265	1.166	1.105
THOP1_MOUSE	(Q8C1A5) Thimet oligopeptidase	1.096	1.486	0.879	1.173	1.077	1.094
ACADL_MOUSE	(P51174) Long-chain specific acyl-CoA dehydrogenase, mitochondrial	1.183	1.323	1.342	1.249	1.012	0.925
DLG4_MOUSE	(Q62108) Disks large homolog 4	0.971	0.961	0.975	0.886	1.024	0.921
CTNB1_MOUSE	(Q02248) Catenin beta-1	1.144	0.678	0.909	0.699	0.992	1.042
AT1B1_MOUSE	(P14094) Sodium/potassium-transporting ATPase subunit beta-1	1.162	0.785	1.031	1.056	1.317	1.133
PAIRB_MOUSE	(Q9CY58) Plasminogen activator inhibitor 1 RNA-binding protein	0.752	1.12	1.612	0.706	1.135	1.077
DC1I2_MOUSE	(O88487) Cytoplasmic dynein 1 intermediate chain 2	1.007	1.059	0.997	0.956	0.963	1.006
HYOU1_MOUSE	(Q9JKR6) Hypoxia up-regulated protein 1	0.895	0.94	0.938	0.621	0.81	0.869
GTR3_MOUSE	(P32037) Solute carrier family 2, facilitated glucose transporter member 3	1.094	0.969	1.119	0.911	1.018	1.025
SE6L2_MOUSE	(Q4V9Z5) Seizure 6-like protein 2	1.074	1.143	1.176	0.768	0.863	1.023
EPHA4_MOUSE	(Q03137) Ephrin type-A receptor 4	1.01	0.879	0.959	0.901	0.91	0.975
SET_MOUSE	(Q9EQU5) Protein SET	0.814	0.928	0.757	0.704	0.938	1.05
LANC1_MOUSE	(O89112) LanC-like protein 1	0.833	0.945	0.763	0.54	0.766	0.838
RHOG_MOUSE	(P84096) Rho-related GTP-binding protein RhoG	1.091	1.056	1.139	0.892	1.004	1.496
MNF1_MOUSE	(Q9CQY6) Mitochondrial nucleoid factor 1	1.03	1.031	0.985	1.399	1.045	1.168
RCN1_MOUSE	(Q05186) Reticulocalbin-1	0.875	0.95	0.933	0.665	0.777	0.895
AT1B2_MOUSE	(P14231) Sodium/potassium-transporting ATPase subunit beta-2	0.997	1.016	1.312	0.96	1.187	0.9
GATB_MOUSE	(Q99JT1) Glutamyl-tRNA(Gln) amidotransferase subunit B, mitochondrial	1.15	1.219	0.973	0.98	1.023	0.982
ZNT9_MOUSE	(Q5IRJ6) Zinc transporter 9	0.95	0.98	1.03	0.982	0.987	0.92
STRAP_MOUSE	(Q9Z1Z2) Serine-threonine kinase receptor-associated protein	0.977	0.968	0.93	0.926	1.15	1.053
ISCA2_MOUSE	(Q9DCB8) Iron-sulfur cluster assembly 2 homolog, mitochondrial	0.967	1.009	0.931	0.992	0.853	0.856
DNJA2_MOUSE	(Q9QYJ0) DnaJ homolog subfamily A member 2	0.583	0.854	0.691	0.726	0.923	0.985
SEP11_MOUSE	(Q8C1B7) Septin-11	0.899	0.845	0.798	1.228	1.065	1.216
SEPT6_MOUSE	(Q9R1T4) Septin-6	1.275	0.953	1.049	1.223	1.204	1.185
ACES_MOUSE	(P21836) Acetylcholinesterase	1.107	0.954	1.175	1.014	1.001	0.902
EPMIP_MOUSE	(Q8VEH5) EPM2A-interacting protein 1	0.962	1.01	1.082	0.969	0.895	1.025
ETFA_MOUSE	(Q99LC5) Electron transfer flavoprotein subunit alpha, mitochondrial	0.979	1.103	0.728	1.022	0.953	1.019
PDE10_MOUSE	(Q8CA95) cAMP and cAMP-inhibited cGMP 3',5'-cyclic phosphodiesterase 10A	1.116	1.044	1.029	1.032	1.151	1.053
PRAF3_MOUSE	(Q8R5J9) PRA1 family protein 3	1.009	1.034	1.031	0.946	1.09	1.042
CCD47_MOUSE	(Q9D024) Coiled-coil domain-containing protein 47	0.965	0.665	0.779	0.691	0.81	1.062
STX8_MOUSE	(O88983) Syntaxin-8	1.23	1.191	1.114	0.685	0.957	0.889
PYRD_MOUSE	(O35435) Dihydroorotate dehydrogenase (quinone), mitochondrial	0.92	0.962	1.071	1.107	0.972	0.93
SYYC_MOUSE	(Q91WQ3) Tyrosine--tRNA ligase, cytoplasmic	0.957	1.059	1.038	1.091	1.045	1.057
PTPRD_MOUSE	(Q64487) Receptor-type tyrosine-protein phosphatase delta	1.105	0.861	0.9	0.93	0.893	1.012
PTPRS_MOUSE	(B0V2N1) Receptor-type tyrosine-protein phosphatase S	1.115	0.957	1.016	0.956	1.03	0.87
NDUS5_MOUSE	(Q99LY9) NADH dehydrogenase [ubiquinone] iron-sulfur protein 5	1.044	1.079	0.866	0.72	1.008	0.726
GLRX3_MOUSE	(Q9CQM9) Glutaredoxin-3	0.945	1.055	0.825	0.972	0.993	0.978
GPD1L_MOUSE	(Q3ULJ0) Glycerol-3-phosphate dehydrogenase 1-like protein	0.98	0.986	0.805	1.047	1.037	0.975
DLG1_MOUSE	(Q811D0) Disks large homolog 1	1.015	0.975	1.025	0.917	1.077	0.979
SYUG_MOUSE	(Q9Z0F7) Gamma-synuclein	1.347	1.475	1.013	2.379	0.915	1.623
CYTC_MOUSE	(P21460) Cystatin-C	0.861	0.906	0.82	0.754	0.89	0.88
VP26A_MOUSE	(P40336) Vacuolar protein sorting-associated protein 26A	1.444	1.164	1.068	1.062	0.924	1.231
ATP5L_MOUSE	ATP synthase subunit g, mitochondrial OS=Mus musculus GN=Atp5l PE=1 SV=1	0.758	1.083	0.709	0.908	0.973	0.75
PITM1_MOUSE	(O35954) Membrane-associated phosphatidylinositol transfer protein 1	1.033	1.144	1.102	1.083	1.119	1.149
TCPE_MOUSE	(P80316) T-complex protein 1 subunit epsilon	1.038	1.095	0.98	0.978	0.959	0.966
PPTC7_MOUSE	(Q6NVE9) Protein phosphatase PTC7 homolog	0.949	1.381	0.839	1.052	0.84	0.884
RTN1_MOUSE	(Q8K0T0) Reticulon-1	0.768	0.913	1.016	0.824	0.947	0.866
PTPA_MOUSE	(P58389) Serine/threonine-protein phosphatase 2A activator	0.999	1.002	1.011	1.103	0.885	0.927
AP2S1_MOUSE	(P62743) AP-2 complex subunit sigma	1.108	1.072	1.392	1.251	1.238	1.375
FXL16_MOUSE	(A2RT62) F-box/LRR-repeat protein 16	0.888	0.971	0.95	0.986	0.881	0.951
SH3L3_MOUSE	(Q91VW3) SH3 domain-binding glutamic acid-rich-like protein 3	0.923	1.387	1	0.962	1.16	1.156
HCDH_MOUSE	(Q61425) Hydroxyacyl-coenzyme A dehydrogenase, mitochondrial	0.951	1.006	0.818	1.212	0.947	0.823
GANAB_MOUSE	(Q8BHN3) Neutral alpha-glucosidase AB	0.986	1.194	1.061	0.734	0.898	0.999
KPCB_MOUSE	(P68404) Protein kinase C beta type	1.014	0.798	0.875	0.98	0.902	1.018
COX41_MOUSE	(P19783) Cytochrome c oxidase subunit 4 isoform 1, mitochondrial	0.969	1.009	0.395	0.363	0.617	0.433
FXYD6_MOUSE	(Q9D164) FXYD domain-containing ion transport regulator 6	1.035	0.942	1.046	0.87	1.101	1.043
NGEF_MOUSE	(Q8CHT1) Ephexin-1	1.4	1.17	0.871	0.751	0.931	0.909
AMPL_MOUSE	(Q9CPY7) Cytosol aminopeptidase	0.997	1.142	0.977	1.113	0.906	0.849
NCS1_MOUSE	(Q8BNY6) Neuronal calcium sensor 1	0.95	1.184	1.148	1.085	1.08	1.076
ALR_MOUSE	(P56213) FAD-linked sulfhydryl oxidase ALR	1.12	0.969	1.035	1.088	0.924	0.876
CRIP2_MOUSE	(Q9DCT8) Cysteine-rich protein 2	1.096	0.725	1.259	0.779	1.143	1.101
AHSA1_MOUSE	(Q8BK64) Activator of 90 kDa heat shock protein ATPase homolog 1	0.939	0.891	0.851	1.042	0.879	0.953
AT8A1_MOUSE	(P70704) Probable phospholipid-transporting ATPase IA	1.109	1.028	1.318	1.305	1.161	1.067
RT26_MOUSE	(Q80ZS3) 28S ribosomal protein S26, mitochondrial	1.015	0.901	0.88	0.911	1.094	0.74
TIM16_MOUSE	(Q9CQV1) Mitochondrial import inner membrane translocase subunit TIM16	1.106	1.1	1.29	1.066	1.123	1.056
K0513_MOUSE	(Q8R0A7) Uncharacterized protein KIAA0513	1.11	0.903	0.946	0.961	0.936	1.004
HPRT_MOUSE	(P00493) Hypoxanthine-guanine phosphoribosyltransferase	0.978	0.933	0.898	1.372	1.1	1.096
LIGO1_MOUSE	(Q9D1T0) Leucine-rich repeat and immunoglobulin-like domain-containing nogo receptor-interacting protein 1	1.045	0.925	0.97	0.946	0.929	0.893
L1CAM_MOUSE	(P11627) Neural cell adhesion molecule L1	1.009	0.921	0.785	0.71	1.072	0.791
SRC8_MOUSE	(Q60598) Src substrate cortactin	0.999	0.972	1.07	1.053	1.008	1.094
RPGF2_MOUSE	(Q8CHG7) Rap guanine nucleotide exchange factor 2	1.032	1.09	0.972	1.094	1.134	1.155
ACOT2_MOUSE	(Q9QYR9) Acyl-coenzyme A thioesterase 2, mitochondrial	0.893	1.017	0.969	1.069	0.915	0.834
S10AD_MOUSE	(P97352) Protein S100-A13	0.836	0.881	0.77	0.792	0.771	0.817
SNG1_MOUSE	(O55100) Synaptogyrin-1	0.945	0.999	0.918	0.988	1.021	0.938
AFG32_MOUSE	(Q8JZQ2) AFG3-like protein 2	1.033	1.184	1.094	1.015	1.017	0.941
PCYXL_MOUSE	(Q8C7K6) Prenylcysteine oxidase-like	0.935	0.947	0.847	0.76	0.975	1.033
HACD3_MOUSE	(Q8K2C9) Very-long-chain (3R)-3-hydroxyacyl-[acyl-carrier protein] dehydratase 3	1.074	1.078	1.065	1.02	1.008	1.245
DIP2B_MOUSE	(Q3UH60) Disco-interacting protein 2 homolog B	0.976	0.659	0.852	0.669	0.791	0.744
TXNL1_MOUSE	(Q8CDN6) Thioredoxin-like protein 1	0.938	0.989	0.964	1.027	0.945	0.998
PACS1_MOUSE	(Q8K212) Phosphofurin acidic cluster sorting protein 1	0.889	0.976	0.925	1.01	1.024	1.052
GRIA2_MOUSE	(P23819) Glutamate receptor 2	0.868	0.919	0.825	0.906	0.937	1.017
RB3GP_MOUSE	(Q80UJ7) Rab3 GTPase-activating protein catalytic subunit	1.076	1.116	1.32	0.902	0.985	1.029
RANG_MOUSE	(P34022) Ran-specific GTPase-activating protein	0.95	0.836	0.854	0.961	0.892	1.08
PPIB_MOUSE	(P24369) Peptidyl-prolyl cis-trans isomerase B	0.91	1.155	1.025	0.687	0.997	1.004
NOMO1_MOUSE	(Q6GQT9) Nodal modulator 1	0.969	0.918	0.912	0.504	0.869	0.966
MTOR_MOUSE	(Q9JLN9) Serine/threonine-protein kinase mTOR	0.95	0.956	0.921	0.928	1.03	0.981
KCY_MOUSE	(Q9DBP5) UMP-CMP kinase	0.913	1.395	0.759	1.033	0.89	0.878
P5I11_MOUSE	(Q4QQM4) Tumor protein p53-inducible protein 11	0.942	1.644	0.962	0.781	0.88	0.913
PSMD1_MOUSE	(Q3TXS7) 26S proteasome non-ATPase regulatory subunit 1	0.956	0.934	1.102	1.019	1.134	1.123
DHB8_MOUSE	(P50171) Estradiol 17-beta-dehydrogenase 8	0.824	1.033	0.698	0.947	0.843	0.734
VAT1_MOUSE	(Q62465) Synaptic vesicle membrane protein VAT-1 homolog	0.878	0.839	1.029	1.156	0.932	1.147
DLG3_MOUSE	(P70175) Disks large homolog 3	1.145	0.834	1.239	0.942	1.153	1.094
DTD1_MOUSE	(Q9DD18) D-tyrosyl-tRNA(Tyr) deacylase 1	0.785	0.853	0.904	0.922	0.986	0.911
HAP28_MOUSE	(Q3UHX2) 28 kDa heat- and acid-stable phosphoprotein	0.9	0.966	0.896	0.888	0.959	0.923
RS3_MOUSE	(P62908) 40S ribosomal protein S3	0.886	0.88	0.872	0.701	0.978	1.149
RSSA_MOUSE	(P14206) 40S ribosomal protein SA	1.139	0.932	0.994	0.375	1.158	1.524
RRBP1_MOUSE	(Q99PL5) Ribosome-binding protein 1	0.904	0.917	0.826	0.545	0.847	0.945
SNX3_MOUSE	(O70492) Sorting nexin-3	0.951	1.096	1.369	0.997	1.288	0.906
GBRA1_MOUSE	(P62812) Gamma-aminobutyric acid receptor subunit alpha-1	1.02	0.942	1.044	0.951	1.003	0.9
PLSL_MOUSE	(Q61233) Plastin-2	0.879	0.885	0.989	0.665	0.808	0.829
PLST_MOUSE	(Q99K51) Plastin-3	0.901	0.955	0.973	0.836	0.88	0.951
HNRPK_MOUSE	(P61979) Heterogeneous nuclear ribonucleoprotein K	0.861	1.097	0.928	0.724	0.886	0.955
KAD2_MOUSE	(Q9WTP6) Adenylate kinase 2, mitochondrial	0.828	0.812	0.77	1.28	0.89	0.868
VPS52_MOUSE	(Q8C754) Vacuolar protein sorting-associated protein 52 homolog	0.898	1.028	1.028	1.001	0.988	1.124
CUL5_MOUSE	(Q9D5V5) Cullin-5	1.007	1.047	1.03	0.983	0.966	1.021
CAD13_MOUSE	(Q9WTR5) Cadherin-13	1.415	1.273	1.316	1.435	1.25	1.492
PLD3_MOUSE	(O35405) Phospholipase D3	0.88	1.115	0.975	0.582	0.774	0.83
DIRA2_MOUSE	(Q5PR73) GTP-binding protein Di-Ras2	1.062	1.06	0.905	0.952	0.983	0.914
SH3G3_MOUSE	(Q62421) Endophilin-A3	0.976	0.952	0.974	1.172	1.081	1.011
PDE1A_MOUSE	(Q61481) Calcium/calmodulin-dependent 3',5'-cyclic nucleotide phosphodiesterase 1A	0.946	1.043	1.008	0.94	0.866	1.025
PURA2_MOUSE	(P46664) Adenylosuccinate synthetase isozyme 2	1.43	1.058	1.511	1.181	1.033	1.635
PURA1_MOUSE	(P28650) Adenylosuccinate synthetase isozyme 1	1.658	1.04	1.565	1.039	1.094	1.864
KIF1A_MOUSE	(P33173) Kinesin-like protein KIF1A	1.101	1.038	1.08	1.088	1.226	1.076
CDK5_MOUSE	(P49615) Cyclin-dependent kinase 5	1.017	1.085	0.948	1.098	0.893	1.046
CSN4_MOUSE	(O88544) COP9 signalosome complex subunit 4	1.098	1.08	1.229	1.21	1.17	1.35
RABL6_MOUSE	(Q5U3K5) Rab-like protein 6	1.119	1.196	1.131	1.122	1.266	1.299
SYT12_MOUSE	(Q920N7) Synaptotagmin-12	1.173	1.09	1.125	0.975	1.025	0.912
SCG1_MOUSE	(P16014) Secretogranin-1	0.949	0.994	1.012	0.966	0.966	1
TBCB_MOUSE	(Q9D1E6) Tubulin-folding cofactor B	1.008	0.867	0.913	1.018	0.907	0.901
PABP1_MOUSE	(P29341) Polyadenylate-binding protein 1	0.995	1.046	1.103	0.883	0.956	1.085
STMN1_MOUSE	(P54227) Stathmin	0.914	0.857	0.874	0.909	0.864	0.858
STMN2_MOUSE	(P55821) Stathmin-2	0.918	0.85	0.874	0.905	0.865	0.857
STMN3_MOUSE	(O70166) Stathmin-3	0.94	0.956	1.153	0.931	0.923	0.881
GGT7_MOUSE	(Q99JP7) Gamma-glutamyltransferase 7	1.078	0.953	0.937	0.966	0.929	1.088
ERLN1_MOUSE	(Q91X78) Erlin-1	0.832	0.947	0.942	0.662	0.855	0.919
DLRB1_MOUSE	(P62627) Dynein light chain roadblock-type 1	0.976	1.248	0.995	1.011	1.066	1.117
ADCY9_MOUSE	(P51830) Adenylate cyclase type 9	1.102	1.014	1.278	1.01	1.246	1.144
ADPRH_MOUSE	(P54923) [Protein ADP-ribosylarginine] hydrolase	1.271	1.034	5.492	0.729	1.083	1.236
TWF1_MOUSE	(Q91YR1) Twinfilin-1	0.897	0.835	1.073	1.017	0.979	1.007
ITSN1_MOUSE	(Q9Z0R4) Intersectin-1	1.147	1.07	2.699	0.8	1.084	1.207
SYHC_MOUSE	(Q61035) Histidine--tRNA ligase, cytoplasmic	1.067	1.115	1.092	1.021	0.933	0.95
OPALI_MOUSE	(Q7M750) Opalin	1.027	0.982	0.625	0.624	0.537	0.514
SCFD1_MOUSE	(Q8BRF7) Sec1 family domain-containing protein 1	0.759	0.687	0.718	0.726	0.574	0.793
RB11B_MOUSE	(P46638) Ras-related protein Rab-11B	1.089	1.022	1.017	0.948	0.931	0.865
TAGL3_MOUSE	(Q9R1Q8) Transgelin-3	0.924	0.969	0.779	0.881	1.074	1.016
PDDC1_MOUSE	(Q8BFQ8) Parkinson disease 7 domain-containing protein 1	0.936	0.786	0.826	1.047	0.941	1.149
TPIS_MOUSE	(P17751) Triosephosphate isomerase	1.085	0.829	0.962	1.28	1.084	0.969
PLM_MOUSE	(Q9Z239) Phospholemman	1.01	0.923	1.121	0.916	0.996	0.889
ANXA3_MOUSE	(O35639) Annexin A3	1.03	1.197	0.848	0.665	0.789	0.85
IMPA1_MOUSE	(O55023) Inositol monophosphatase 1	0.932	1.156	0.877	1.19	1.16	1.056
PCLO_MOUSE	(Q9QYX7) Protein piccolo	1.092	1.481	0.926	0.962	1.078	1.03
USP9X_MOUSE	(P70398) Probable ubiquitin carboxyl-terminal hydrolase FAF-X	0.889	0.987	0.918	1.028	0.975	0.969
RL18_MOUSE	(P35980) 60S ribosomal protein L18	1.029	1.201	0.995	0.749	0.959	1.218
ATP5H_MOUSE	(Q9DCX2) ATP synthase subunit d, mitochondrial	0.934	0.771	0.706	1.015	0.987	0.875
PGRC1_MOUSE	(O55022) Membrane-associated progesterone receptor component 1	0.937	1.162	1.134	0.863	1.026	1.004
VAT1L_MOUSE	(Q80TB8) Synaptic vesicle membrane protein VAT-1 homolog-like	0.901	1.149	1.011	1.17	0.882	1.05
PLAP_MOUSE	(P27612) Phospholipase A-2-activating protein	0.963	0.975	0.973	0.9	0.932	0.921
PSMD3_MOUSE	(P14685) 26S proteasome non-ATPase regulatory subunit 3	1.03	1.169	0.989	1.092	0.974	1.049
HTRA2_MOUSE	(Q9JIY5) Serine protease HTRA2, mitochondrial	0.998	0.976	0.738	0.724	1.174	0.676
PLBL2_MOUSE	(Q3TCN2) Putative phospholipase B-like 2	0.763	1.076	0.941	0.619	0.837	0.766
PRRT2_MOUSE	(E9PUL5) Proline-rich transmembrane protein 2	1.03	0.87	1.184	0.959	1.205	1.076
LGUL_MOUSE	(Q9CPU0) Lactoylglutathione lyase	0.718	0.722	0.681	0.95	0.681	1.209
NAC1_MOUSE	(P70414) Sodium/calcium exchanger 1	0.987	0.875	0.861	0.92	1.135	0.913
GNS_MOUSE	(Q8BFR4) N-acetylglucosamine-6-sulfatase	0.957	1.204	1.107	0.816	1.079	1.009
MUTA_MOUSE	(P16332) Methylmalonyl-CoA mutase, mitochondrial	1.039	0.86	0.884	1.19	0.909	1.072
PAK1_MOUSE	(O88643) Serine/threonine-protein kinase PAK 1	0.889	0.835	0.823	1.05	0.954	0.878
TOM70_MOUSE	(Q9CZW5) Mitochondrial import receptor subunit TOM70	1.042	0.977	0.823	0.915	0.948	0.889
RS6_MOUSE	(P62754) 40S ribosomal protein S6	0.9	1.092	1.005	0.688	0.893	1.13
UBE2K_MOUSE	(P61087) Ubiquitin-conjugating enzyme E2 K	0.931	1.105	1.132	0.987	0.944	0.997
ICEF1_MOUSE	(Q5DU31) Interactor protein for cytohesin exchange factors 1	1.295	0.895	0.997	0.946	1.059	0.937
IDHP_MOUSE	(P54071) Isocitrate dehydrogenase [NADP], mitochondrial	0.949	1.115	1.09	1.364	1.27	1.117
CA198_MOUSE	(Q8C3W1) Uncharacterized protein C1orf198 homolog	0.829	0.781	0.933	1.004	0.952	0.956
NDUC2_MOUSE	NADH dehydrogenase [ubiquinone] 1 subunit C2 OS=Mus musculus GN=Ndufc2 PE=1 SV=1	0.916	1.008	0.729	0.711	0.691	0.607
IPO5_MOUSE	(Q8BKC5) Importin-5	0.867	0.959	0.838	0.857	0.926	1.038
FUCM_MOUSE	(Q8R2K1) Fucose mutarotase	0.978	1.138	0.816	0.961	0.936	1.004
IDHC_MOUSE	(O88844) Isocitrate dehydrogenase [NADP] cytoplasmic	0.942	0.902	0.701	1.042	0.943	1.131
QCR6_MOUSE	(P99028) Cytochrome b-c1 complex subunit 6, mitochondrial	1.008	0.921	0.907	0.829	1.028	0.862
VINC_MOUSE	(Q64727) Vinculin	1.126	1.446	1.21	1.299	1.455	1.465
SEPT4_MOUSE	(P28661) Septin-4	1.024	0.905	0.977	1.154	0.903	1.019
DNJA3_MOUSE	(Q99M87) DnaJ homolog subfamily A member 3, mitochondrial	0.965	1.003	1.054	0.533	1.014	0.819
MFN2_MOUSE	(Q80U63) Mitofusin-2	1.132	0.972	1.088	0.984	1.077	1.21
CBPE_MOUSE	(Q00493) Carboxypeptidase E	0.952	0.994	1.103	0.894	0.947	1.099
MTFP1_MOUSE	(Q9CRB8) Mitochondrial fission process protein 1	0.894	1.038	0.861	0.932	0.947	0.848
STML2_MOUSE	(Q99JB2) Stomatin-like protein 2, mitochondrial	0.987	1.097	1.071	1.15	1.105	1.048
GIT1_MOUSE	(Q68FF6) ARF GTPase-activating protein GIT1	0.872	1.09	0.999	0.867	0.985	1.102
EXOG_MOUSE	(Q8C163) Nuclease EXOG, mitochondrial	1.199	1.032	0.922	0.987	0.966	0.926
DTNA_MOUSE	(Q9D2N4) Dystrobrevin alpha	1.057	1.146	0.949	0.854	0.965	1.125
RT07_MOUSE	(Q80X85) 28S ribosomal protein S7, mitochondrial	1.051	1.074	0.982	0.916	1.084	0.807
CRK_MOUSE	(Q64010) Adapter molecule crk	1.071	1.306	1.051	1.287	0.98	1.121
TPP2_MOUSE	(Q64514) Tripeptidyl-peptidase 2	0.923	1.079	1.072	0.955	1.134	1.003
SYLM_MOUSE	(Q8VDC0) Probable leucine--tRNA ligase, mitochondrial	0.85	0.868	0.81	1.065	0.905	1.04
GRM3_MOUSE	(Q9QYS2) Metabotropic glutamate receptor 3	1.105	0.955	1.199	0.787	0.881	0.849
B3GA3_MOUSE	(P58158) Galactosylgalactosylxylosylprotein 3-beta-glucuronosyltransferase 3	0.955	1.234	1.001	0.523	0.902	0.755
STK39_MOUSE	(Q9Z1W9) STE20/SPS1-related proline-alanine-rich protein kinase	1.174	0.954	1.851	1.146	1.171	1.127
PREP_MOUSE	(Q8K411) Presequence protease, mitochondrial	0.919	1.14	1.075	1.102	1.011	0.85
CLCA_MOUSE	(O08585) Clathrin light chain A	0.942	0.891	0.937	1.076	1.081	0.988
PSB7_MOUSE	(P70195) Proteasome subunit beta type-7	1.14	1.042	1.215	1.341	0.897	1.044
SLK_MOUSE	(O54988) STE20-like serine/threonine-protein kinase	0.97	0.91	0.935	1.113	0.909	1.001
MYPT1_MOUSE	(Q9DBR7) Protein phosphatase 1 regulatory subunit 12A	0.883	0.922	0.968	1.011	1.049	1.184
LIN7A_MOUSE	(Q8JZS0) Protein lin-7 homolog A	0.949	0.592	0.82	0.877	0.879	1.016
LIN7B_MOUSE	(O88951) Protein lin-7 homolog B	0.951	0.658	0.967	0.936	0.778	0.845
MPPB_MOUSE	(Q9CXT8) Mitochondrial-processing peptidase subunit beta	1.005	1.037	1.03	1.199	1.039	0.93
SYEP_MOUSE	(Q8CGC7) Bifunctional glutamate/proline--tRNA ligase	0.722	1.088	0.758	0.941	0.726	0.935
DCE2_MOUSE	(P48320) Glutamate decarboxylase 2	0.954	0.883	1.147	1.208	0.982	0.954
RPGP2_MOUSE	(Q5SVL6) Rap1 GTPase-activating protein 2	0.492	0.897	0.626	1.09	0.787	0.621
DENR_MOUSE	(Q9CQJ6) Density-regulated protein	1.026	1.069	1.013	1.064	1.027	1.073
NDUS7_MOUSE	(Q9DC70) NADH dehydrogenase [ubiquinone] iron-sulfur protein 7, mitochondrial	0.965	0.987	0.815	0.756	0.757	0.681
NAMPT_MOUSE	(Q99KQ4) Nicotinamide phosphoribosyltransferase	2.015	2.234	1.915	1.698	2.119	2.252
TM9S2_MOUSE	(P58021) Transmembrane 9 superfamily member 2	1.036	1.033	1.176	0.567	0.979	0.885
GBLP_MOUSE	(P68040) Guanine nucleotide-binding protein subunit beta-2-like 1	0.909	1.053	1.093	0.753	1.042	1.176
FXYD7_MOUSE	(P59648) FXYD domain-containing ion transport regulator 7	1.02	1.107	1.038	0.706	0.978	0.803
CCG8_MOUSE	(Q8VHW2) Voltage-dependent calcium channel gamma-8 subunit	1.204	0.824	1.677	0.68	0.787	1.066
PICA_MOUSE	(Q7M6Y3) Phosphatidylinositol-binding clathrin assembly protein	1.132	0.925	1.124	0.922	0.924	1.011
SRCN1_MOUSE	(Q9QWI6) SRC kinase signaling inhibitor 1	1.136	0.851	1.099	0.926	1.178	1.073
PIMT_MOUSE	(P23506) Protein-L-isoaspartate(D-aspartate) O-methyltransferase	1.037	0.765	0.737	0.956	0.889	0.923
HNRPQ_MOUSE	(Q7TMK9) Heterogeneous nuclear ribonucleoprotein Q	1.116	0.864	0.74	0.719	0.933	1.013
NEDD8_MOUSE	(P29595) NEDD8	1.111	0.845	0.839	0.967	0.927	0.965
MLEC_MOUSE	(Q6ZQI3) Malectin	0.874	0.818	0.785	0.56	0.804	1.058
TRIM2_MOUSE	(Q9ESN6) Tripartite motif-containing protein 2	0.989	1.143	1.061	1.005	1.017	1.134
CLPT1_MOUSE	(Q8VBZ3) Cleft lip and palate transmembrane protein 1 homolog	0.864	0.831	0.962	0.646	0.794	0.763
RAB21_MOUSE	(P35282) Ras-related protein Rab-21	1.024	0.943	1.073	0.975	0.881	0.854
SYRC_MOUSE	(Q9D0I9) Arginine--tRNA ligase, cytoplasmic	1.027	1.116	0.98	0.92	0.976	1.001
CAZA2_MOUSE	(P47754) F-actin-capping protein subunit alpha-2	1.233	1.063	1.059	1.208	1.065	1.31
TSN7_MOUSE	(Q62283) Tetraspanin-7	0.937	0.855	1.299	0.788	0.838	0.834
ABCD3_MOUSE	(P55096) ATP-binding cassette sub-family D member 3	1.083	1.014	1.341	1.073	0.972	1.332
SUCB2_MOUSE	(Q9Z2I8) Succinyl-CoA ligase [GDP-forming] subunit beta, mitochondrial	0.972	1.069	1.091	1.293	1.155	0.958
PSMD4_MOUSE	(O35226) 26S proteasome non-ATPase regulatory subunit 4	1.083	0.845	0.862	0.982	0.962	0.936
HSC20_MOUSE	(Q8K3A0) Iron-sulfur cluster co-chaperone protein HscB, mitochondrial	1.367	1.312	1.377	1.199	1.266	1.44
NPM_MOUSE	(Q61937) Nucleophosmin	1.046	1.295	0.926	0.727	0.968	1.109
SH3L1_MOUSE	(Q9JJU8) SH3 domain-binding glutamic acid-rich-like protein	1.148	1.053	1.211	1.103	1.05	1.103
NU4M_MOUSE	NADH-ubiquinone oxidoreductase chain 4 OS=Mus musculus GN=Mtnd4 PE=1 SV=1	0.869	1.026	0.768	0.563	0.766	0.641
CAMLG_MOUSE	(P49070) Calcium signal-modulating cyclophilin ligand	1.041	0.936	1.007	0.838	1.103	1.204
EMC2_MOUSE	(Q9CRD2) ER membrane protein complex subunit 2	1.22	1.119	2.188	0.803	1.127	1.027
EMC1_MOUSE	(Q8C7X2) ER membrane protein complex subunit 1	0.915	1.388	1.313	0.698	1.045	1.142
SNX1_MOUSE	(Q9WV80) Sorting nexin-1	1.086	1.169	1.252	1.046	1.028	1.123
FAM21_MOUSE	(Q6PGL7) WASH complex subunit FAM21	1.036	0.906	0.951	0.811	1.012	0.829
PRS4_MOUSE	(P62192) 26S protease regulatory subunit 4	0.884	1.045	0.942	1.063	0.996	1.028
RHG01_MOUSE	(Q5FWK3) Rho GTPase-activating protein 1	1.105	0.954	1.004	1.244	1.017	0.988
NEO1_MOUSE	(P97798) Neogenin	1.218	0.908	1.024	1.06	1.049	1.135
INPP_MOUSE	(P49442) Inositol polyphosphate 1-phosphatase	0.791	0.823	0.842	0.969	0.774	0.93
PTPR2_MOUSE	(P80560) Receptor-type tyrosine-protein phosphatase N2	1.002	1.11	1.146	0.927	0.828	1.124
AMPD2_MOUSE	(Q9DBT5) AMP deaminase 2	1.045	0.979	0.895	0.998	0.995	1.031
RUVB2_MOUSE	(Q9WTM5) RuvB-like 2	1.085	1.013	0.92	1.006	0.991	1.069
SNX6_MOUSE	(Q6P8X1) Sorting nexin-6	0.967	1.033	1.253	1.216	0.959	1.049
SAR1A_MOUSE	(P36536) GTP-binding protein SAR1a	1.351	1.115	1.505	1.072	1.244	1.68
CSKI1_MOUSE	(Q6P9K8) Caskin-1	1.028	1.389	1.091	0.823	1.197	1.29
DHAK_MOUSE	(Q8VC30) Bifunctional ATP-dependent dihydroxyacetone kinase/FAD-AMP lyase (cyclizing)	1.162	1.056	1.169	1.355	0.968	1.293
NSMA2_MOUSE	(Q9JJY3) Sphingomyelin phosphodiesterase 3	0.982	1.107	1.084	0.951	0.948	0.979
PI51C_MOUSE	(O70161) Phosphatidylinositol 4-phosphate 5-kinase type-1 gamma	1.074	1.01	0.92	1.029	1.027	1.017
ARPC3_MOUSE	(Q9JM76) Actin-related protein 2/3 complex subunit 3	1.049	1.223	1.199	0.95	1.045	1.114
EMC4_MOUSE	(Q9CZX9) ER membrane protein complex subunit 4	1.072	0.986	0.935	0.521	0.795	0.972
ROGDI_MOUSE	(Q3TDK6) Protein rogdi homolog	1.166	0.965	0.705	1.482	0.855	1.018
NEUL_MOUSE	(Q91YP2) Neurolysin, mitochondrial	1.075	0.882	1.072	1.184	1.002	1.08
KAPCB_MOUSE	(P68181) cAMP-dependent protein kinase catalytic subunit beta	1.059	0.841	0.663	0.545	1.394	0.849
TOM20_MOUSE	(Q9DCC8) Mitochondrial import receptor subunit TOM20 homolog	0.915	0.746	0.981	0.736	0.702	0.968
SAP3_MOUSE	(Q60648) Ganglioside GM2 activator	0.887	1.124	0.876	0.656	0.794	0.832
CATA_MOUSE	(P24270) Catalase	1.081	0.937	1.115	0.832	0.897	1.046
OSBL6_MOUSE	(Q8BXR9) Oxysterol-binding protein-related protein 6	0.887	1.066	0.968	0.952	0.898	0.87
SNPH_MOUSE	(Q80U23) Syntaphilin	1.014	0.873	0.972	0.799	1.207	1.166
RAB18_MOUSE	(P35293) Ras-related protein Rab-18	0.925	0.946	1.238	0.949	0.918	1.037
CYFP1_MOUSE	(Q7TMB8) Cytoplasmic FMR1-interacting protein 1	0.972	1.064	0.993	0.775	0.915	0.919
RT30_MOUSE	(Q9D0G0) 28S ribosomal protein S30, mitochondrial	0.968	0.975	3.565	0.856	0.928	0.815
BAIP2_MOUSE	(Q8BKX1) Brain-specific angiogenesis inhibitor 1-associated protein 2	0.939	1.249	1.028	0.908	1.032	0.886
SYNRG_MOUSE	(Q5SV85) Synergin gamma	1.102	0.871	0.835	1.046	0.847	1.02
FHIT_MOUSE	(O89106) Bis(5'-adenosyl)-triphosphatase	1.064	1.063	1.181	1.111	0.966	1.099
ODP2_MOUSE	(Q8BMF4) Dihydrolipoyllysine-residue acetyltransferase component of pyruvate dehydrogenase complex, mitochondrial	0.995	0.87	0.755	1.059	0.939	0.899
AOFB_MOUSE	(Q8BW75) Amine oxidase [flavin-containing] B	0.872	1.075	1.034	0.966	0.956	0.888
FKBP8_MOUSE	(O35465) Peptidyl-prolyl cis-trans isomerase FKBP8	1.056	0.96	1.209	1.015	0.96	0.985
PSD3_MOUSE	(Q2PFD7) PH and SEC7 domain-containing protein 3	0.981	1.097	1.068	0.918	1.273	1.316
KPCA_MOUSE	(P20444) Protein kinase C alpha type	1.136	0.96	0.992	1.078	1.093	1.054
CACP_MOUSE	(P47934) Carnitine O-acetyltransferase	0.937	1.036	1.05	1.078	0.956	0.944
CDV3_MOUSE	(Q4VAA2) Protein CDV3	0.919	0.882	0.942	0.782	1.053	0.985
KTN1_MOUSE	(Q61595) Kinectin	1.077	1.074	0.835	0.621	0.765	0.865
SERC1_MOUSE	(Q9QZI8) Serine incorporator 1	1.04	1.038	1.079	0.766	1.138	1.035
7B2_MOUSE	(P12961) Neuroendocrine protein 7B2	0.924	1.037	1.149	1.152	0.922	1.138
HYEP_MOUSE	(Q9D379) Epoxide hydrolase 1	1.346	1.011	1.711	1.133	1.109	1.051
STAM1_MOUSE	(P70297) Signal transducing adapter molecule 1	0.954	0.804	0.75	1.107	0.93	0.915
KPRB_MOUSE	(Q8R574) Phosphoribosyl pyrophosphate synthase-associated protein 2	0.992	1.066	1.099	1.323	1.087	1.218
CF211_MOUSE	(A6H630) UPF0364 protein C6orf211 homolog	1.021	0.843	1.148	1.178	0.939	0.888
NMT1_MOUSE	(O70310) Glycylpeptide N-tetradecanoyltransferase 1	0.838	1.039	0.806	0.898	1.02	1.148
NMT2_MOUSE	(O70311) Glycylpeptide N-tetradecanoyltransferase 2	0.995	1.068	0.904	1.084	1.096	1.187
RAB9B_MOUSE	(Q8BHH2) Ras-related protein Rab-9B	0.92	1.109	1.012	0.877	0.635	0.937
PDXK_MOUSE	(Q8K183) Pyridoxal kinase	1.138	1.422	1.041	1.304	1.098	1.192
RL31_MOUSE	(P62900) 60S ribosomal protein L31	0.9	0.986	0.976	0.705	0.888	1.242
SCNAA_MOUSE	(Q6QIY3) Sodium channel protein type 10 subunit alpha	1.125	0.922	0.996	0.971	1.106	1.131
ABHDA_MOUSE	(Q6PE15) Mycophenolic acid acyl-glucuronide esterase, mitochondrial	0.953	0.946	1.021	1.05	0.845	0.815
PHAR1_MOUSE	(Q2M3X8) Phosphatase and actin regulator 1	1.135	1.028	1.069	1.179	1.138	1.063
XPO2_MOUSE	(Q9ERK4) Exportin-2	1.013	1.148	1.484	1.146	1.107	0.99
AEDO_MOUSE	(Q6PDY2) 2-aminoethanethiol dioxygenase	1.05	1.08	0.925	1.081	0.951	0.902
ACAD9_MOUSE	(Q8JZN5) Acyl-CoA dehydrogenase family member 9, mitochondrial	0.973	1.042	1.03	1.136	0.945	0.942
CNN3_MOUSE	(Q9DAW9) Calponin-3	2.508	2.783	2.547	2.614	2.263	2.652
CP045_MOUSE	(Q8R1Y2) Uncharacterized protein C16orf45 homolog	0.917	0.955	0.948	0.904	1.004	0.99
COF2_MOUSE	(P45591) Cofilin-2	0.852	0.778	1.117	1.098	0.944	1.12
GSLG1_MOUSE	(Q61543) Golgi apparatus protein 1	1.166	1.016	0.955	0.546	0.894	0.785
PNPH_MOUSE	(P23492) Purine nucleoside phosphorylase	0.946	1.174	0.981	0.704	0.763	0.767
TDRKH_MOUSE	(Q80VL1) Tudor and KH domain-containing protein	0.894	0.932	1.093	0.902	0.896	0.987
AGK_MOUSE	(Q9ESW4) Acylglycerol kinase, mitochondrial	1.125	1.06	0.96	1.025	1.024	0.926
GOGA5_MOUSE	(Q9QYE6) Golgin subfamily A member 5	1.043	1.065	0.946	0.672	0.901	0.861
AP1S2_MOUSE	(Q9DB50) AP-1 complex subunit sigma-2	1.342	1.125	2.172	0.864	0.924	0.964
RT27_MOUSE	(Q8BK72) 28S ribosomal protein S27, mitochondrial	0.882	0.914	0.701	0.931	0.934	0.724
ABD12_MOUSE	(Q99LR1) Monoacylglycerol lipase ABHD12	1.323	0.938	1.253	1.166	0.882	1.186
KGUA_MOUSE	(Q64520) Guanylate kinase	0.792	0.658	0.692	0.894	0.778	0.802
HCD2_MOUSE	(O08756) 3-hydroxyacyl-CoA dehydrogenase type-2	1.073	1.06	1.085	1.067	1.133	1.151
UBA5_MOUSE	(Q8VE47) Ubiquitin-like modifier-activating enzyme 5	0.869	1.029	0.95	0.958	0.921	1.134
CKAP5_MOUSE	(A2AGT5) Cytoskeleton-associated protein 5	0.899	0.956	0.989	0.946	0.959	1.004
HIBCH_MOUSE	(Q8QZS1) 3-hydroxyisobutyryl-CoA hydrolase, mitochondrial	0.966	0.492	0.915	1.073	0.835	0.443
NAKD1_MOUSE	(Q8C5H8) NAD kinase domain-containing protein 1, mitochondrial	0.978	0.996	1.156	1.087	0.865	0.987
CBPD_MOUSE	(O89001) Carboxypeptidase D	1.077	1.239	1.086	0.633	0.896	0.853
DYL1_MOUSE	(P63168) Dynein light chain 1, cytoplasmic	1.219	0.855	1.014	1.039	1.122	1.089
IMPCT_MOUSE	(O55091) Protein IMPACT	1.208	1.033	1.214	1.352	1.076	1.243
FRS1L_MOUSE	(B1AXV0) DOMON domain-containing protein FRRS1L	1.023	0.441	0.984	0.843	1.036	0.977
MPPA_MOUSE	(Q9DC61) Mitochondrial-processing peptidase subunit alpha	0.975	1.232	1.106	1.083	1.054	0.95
DCLK1_MOUSE	(Q9JLM8) Serine/threonine-protein kinase DCLK1	0.871	0.889	0.985	0.867	1.035	1.085
CPNE5_MOUSE	(Q8JZW4) Copine-5	0.879	0.93	0.798	0.906	0.957	0.941
CLPB_MOUSE	(Q60649) Caseinolytic peptidase B protein homolog	1.003	1.039	0.887	0.957	0.964	0.864
SYTC_MOUSE	(Q9D0R2) Threonine--tRNA ligase, cytoplasmic	1.003	1.181	1.078	1.089	1.058	0.989
IF2A_MOUSE	(Q6ZWX6) Eukaryotic translation initiation factor 2 subunit 1	0.961	0.995	1.019	0.925	0.886	0.917
EIF1_MOUSE	(P48024) Eukaryotic translation initiation factor 1	1.022	1.039	0.888	1.138	1.097	1.317
NFU1_MOUSE	(Q9QZ23) NFU1 iron-sulfur cluster scaffold homolog, mitochondrial	0.96	1.048	0.978	0.954	0.879	0.787
PGTA_MOUSE	(Q9JHK4) Geranylgeranyl transferase type-2 subunit alpha	0.93	0.977	0.97	0.89	0.853	0.853
UB2L3_MOUSE	(P68037) Ubiquitin-conjugating enzyme E2 L3	0.925	0.907	0.856	1.07	1.121	0.982
CPLX2_MOUSE	(P84086) Complexin-2	0.988	0.826	0.911	1.012	1	0.999
PDK1_MOUSE	(Q8BFP9) [Pyruvate dehydrogenase [lipoamide]] kinase isozyme 1, mitochondrial	1.093	1.195	1.084	1.002	0.992	0.916
GALK1_MOUSE	(Q9R0N0) Galactokinase	1.048	1.083	1.047	1.106	0.988	1.037
ABR_MOUSE	(Q5SSL4) Active breakpoint cluster region-related protein	1.099	0.984	1.14	1.127	1.026	1.077
QKI_MOUSE	(Q9QYS9) Protein quaking	0.973	1.362	0.994	1.057	1.177	1.01
GRB2_MOUSE	(Q60631) Growth factor receptor-bound protein 2	0.975	0.891	0.811	1.001	1.004	1.071
BRK1_MOUSE	(Q91VR8) Protein BRICK1	1.409	1.442	1.311	0.924	1.208	1.217
PITH1_MOUSE	(Q8BWR2) PITH domain-containing protein 1	0.732	0.721	0.922	0.743	0.562	0.791
BACH_MOUSE	(Q91V12) Cytosolic acyl coenzyme A thioester hydrolase	1.138	1.755	1.579	1.746	1.487	1.431
PSA7L_MOUSE	(Q9CWH6) Proteasome subunit alpha type-7-like	1.214	1.071	1.455	1.34	0.947	1.162
DHB11_MOUSE	(Q9EQ06) Estradiol 17-beta-dehydrogenase 11	0.932	0.97	1.144	1.016	1.063	1.059
SNAG_MOUSE	(Q9CWZ7) Gamma-soluble NSF attachment protein	0.888	0.999	0.977	0.966	0.981	1.018
VPS53_MOUSE	(Q8CCB4) Vacuolar protein sorting-associated protein 53 homolog	1.09	0.924	1.117	1.02	0.963	0.919
SNX4_MOUSE	(Q91YJ2) Sorting nexin-4	0.973	0.743	0.87	1.077	0.896	0.923
TFAM_MOUSE	(P40630) Transcription factor A, mitochondrial	0.882	1.088	0.729	0.983	0.866	0.802
S10A6_MOUSE	(P14069) Protein S100-A6	0.922	1.067	1.116	0.752	0.773	0.854
NCOAT_MOUSE	(Q9EQQ9) Bifunctional protein NCOAT	1.043	0.864	0.988	1.039	0.936	0.963
S6A11_MOUSE	(P31650) Sodium- and chloride-dependent GABA transporter 3	0.838	0.869	0.905	1.013	0.974	0.833
NUDC3_MOUSE	(Q8R1N4) NudC domain-containing protein 3	1.083	0.855	0.997	1.065	1.124	1.11
SSRG_MOUSE	(Q9DCF9) Translocon-associated protein subunit gamma	1.3	1.244	1.15	0.785	1.01	1.105
MIMIT_MOUSE	(Q59J78) Mimitin, mitochondrial	0.918	1.093	1.104	0.794	0.913	0.828
S39AA_MOUSE	(Q6P5F6) Zinc transporter ZIP10	1.107	0.869	1.035	0.792	1.027	0.909
ARM10_MOUSE	(Q9D0L7) Armadillo repeat-containing protein 10	1.128	1.18	1.061	0.974	0.754	1.081
CSDE1_MOUSE	(Q91W50) Cold shock domain-containing protein E1	0.852	1.197	0.917	0.897	0.985	1.112
CAPZB_MOUSE	(P47757) F-actin-capping protein subunit beta	0.964	0.852	0.86	1.021	1.056	1.026
CHCH3_MOUSE	(Q9CRB9) Coiled-coil-helix-coiled-coil-helix domain-containing protein 3, mitochondrial	1.032	0.897	0.812	1.072	1.02	0.913
ITB2_MOUSE	(P11835) Integrin beta-2	1.07	1.025	0.751	0.744	0.906	1.011
SPRY7_MOUSE	(Q3TFQ1) SPRY domain-containing protein 7	1.12	1.041	0.872	0.853	0.829	0.701
IPKA_MOUSE	(P63248) cAMP-dependent protein kinase inhibitor alpha	1.052	0.894	0.938	1.084	0.991	1.227
CALB1_MOUSE	(P12658) Calbindin	0.831	1.068	1.486	1.189	1.034	1.395
KPCD_MOUSE	Protein kinase C delta type OS=Mus musculus GN=Prkcd PE=1 SV=3	1.294	0.682	1.593	1.101	1.103	1.383
MACF1_MOUSE	(Q9QXZ0) Microtubule-actin cross-linking factor 1	0.979	1.103	1.112	0.982	1.114	1.271
TWF2_MOUSE	(Q9Z0P5) Twinfilin-2	1.114	1.325	0.933	1.029	1.259	1.476
DJB11_MOUSE	(Q99KV1) DnaJ homolog subfamily B member 11	1.117	1.051	0.738	0.664	1.013	0.946
WFS1_MOUSE	(P56695) Wolframin	0.996	1.019	1.082	0.904	1.099	1.072
TMOD2_MOUSE	(Q9JKK7) Tropomodulin-2	0.887	1.116	0.905	1.072	1.149	1.057
SMAP2_MOUSE	(Q7TN29) Stromal membrane-associated protein 2	0.998	0.952	0.923	0.986	0.808	1.021
FABP5_MOUSE	(Q05816) Fatty acid-binding protein, epidermal	0.915	1.14	1.015	1.08	0.871	0.901
VDAC3_MOUSE	(Q60931) Voltage-dependent anion-selective channel protein 3	1.149	1.372	1.088	1.507	1.47	1.167
EIF3K_MOUSE	(Q9DBZ5) Eukaryotic translation initiation factor 3 subunit K	0.79	1.023	1.383	0.688	0.721	1.056
PGM2L_MOUSE	(Q8CAA7) Glucose 1,6-bisphosphate synthase	0.868	0.939	1.017	1.099	0.92	1.077
RS25_MOUSE	(P62852) 40S ribosomal protein S25	1.304	2.026	1.727	1.158	0.875	1.401
EAA3_MOUSE	(P51906) Excitatory amino acid transporter 3	1.259	1.214	1.406	1.058	1.069	0.871
GPX1_MOUSE	(P11352) Glutathione peroxidase 1	1.285	1.044	1.324	1.168	0.996	1.339
L2HDH_MOUSE	(Q91YP0) L-2-hydroxyglutarate dehydrogenase, mitochondrial	1.139	0.841	1.072	0.885	0.959	0.863
PSB6_MOUSE	(Q60692) Proteasome subunit beta type-6	1.2	0.862	1.546	1.051	0.838	0.972
RM09_MOUSE	(Q99N94) 39S ribosomal protein L9, mitochondrial	0.927	3.473	1.06	0.933	0.806	1.06
GRM2_MOUSE	(Q14BI2) Metabotropic glutamate receptor 2	1.176	0.801	1.303	0.876	0.737	0.922
ASAH1_MOUSE	(Q9WV54) Acid ceramidase	0.996	1.364	1.14	0.874	0.983	0.846
NFS1_MOUSE	(Q9Z1J3) Cysteine desulfurase, mitochondrial	0.947	0.821	0.77	1.175	0.824	0.845
HINT3_MOUSE	(Q9CPS6) Histidine triad nucleotide-binding protein 3	1.089	1.205	1.082	1.184	1.06	1.06
RABE1_MOUSE	(O35551) Rab GTPase-binding effector protein 1	1.077	1.008	1.153	0.969	0.89	1.061
BCR_MOUSE	(Q6PAJ1) Breakpoint cluster region protein	1.006	0.992	0.848	1.06	1.033	1.098
UK114_MOUSE	(P52760) Ribonuclease UK114	0.752	0.973	1.297	0.826	0.562	0.717
SELM_MOUSE	(Q8VHC3) Selenoprotein M	1.076	0.999	0.832	0.827	1.036	1.056
TPD54_MOUSE	(Q9CYZ2) Tumor protein D54	1.045	1.115	1.003	0.989	0.514	0.988
ABCB7_MOUSE	(Q61102) ATP-binding cassette sub-family B member 7, mitochondrial	1.021	0.874	0.97	1.143	0.923	0.925
ORN_MOUSE	(Q9D8S4) Oligoribonuclease, mitochondrial	0.934	0.832	0.796	0.983	0.842	0.912
TMM35_MOUSE	(Q9D328) Transmembrane protein 35	1.044	0.901	0.993	0.753	1.074	0.99
CUL3_MOUSE	(Q9JLV5) Cullin-3	0.965	0.789	0.893	1.036	0.951	0.939
PDK2_MOUSE	(Q9JK42) [Pyruvate dehydrogenase [lipoamide]] kinase isozyme 2, mitochondrial	0.966	1.15	0.868	0.926	0.911	0.799
SHLB2_MOUSE	(Q8R3V5) Endophilin-B2	1.309	0.874	1.283	0.885	0.776	0.778
TB10B_MOUSE	(Q8BHL3) TBC1 domain family member 10B	1.904	1.952	0.705	0.7	0.889	0.967
LPHN3_MOUSE	(Q80TS3) Latrophilin-3	1.113	0.935	1.052	0.958	1.017	0.814
HCN1_MOUSE	(O88704) Potassium/sodium hyperpolarization-activated cyclic nucleotide-gated channel 1	0.796	1.373	0.665	0.66	0.529	0.951
PGRC2_MOUSE	(Q80UU9) Membrane-associated progesterone receptor component 2	1.015	0.548	1.183	1.175	0.923	0.928
NTRK2_MOUSE	(P15209) BDNF/NT-3 growth factors receptor	1.145	0.984	1.268	0.849	1.051	0.993
NAGK_MOUSE	(Q9QZ08) N-acetyl-D-glucosamine kinase	0.902	1.141	0.842	1.245	0.987	1.075
SPRL1_MOUSE	(P70663) SPARC-like protein 1	1.067	0.857	0.966	0.706	0.815	0.855
ARFG2_MOUSE	(Q99K28) ADP-ribosylation factor GTPase-activating protein 2	0.778	1.001	0.994	0.732	0.918	0.979
CETN2_MOUSE	(Q9R1K9) Centrin-2	0.833	0.915	0.916	0.799	1.175	1.116
DHB4_MOUSE	(P51660) Peroxisomal multifunctional enzyme type 2	1.149	1.19	0.98	0.966	1.052	1.071
PRS6B_MOUSE	(P54775) 26S protease regulatory subunit 6B	1.305	0.893	1.059	1.126	1.017	1.073
EPS15_MOUSE	(P42567) Epidermal growth factor receptor substrate 15	0.906	1.037	0.822	0.82	0.856	0.844
DC1L1_MOUSE	(Q8R1Q8) Cytoplasmic dynein 1 light intermediate chain 1	0.888	0.811	0.868	0.895	0.868	1.043
RL10_MOUSE	(Q6ZWV3) 60S ribosomal protein L10	0.973	0.825	1.01	0.808	0.8	1.018
DDRGK_MOUSE	(Q80WW9) DDRGK domain-containing protein 1	0.819	1.041	1.014	0.694	0.764	0.927
RHG44_MOUSE	(Q5SSM3) Rho GTPase-activating protein 44	0.948	1.096	0.859	1.084	1.017	0.884
RS21_MOUSE	(Q9CQR2) 40S ribosomal protein S21	0.922	1.04	1.007	0.599	0.929	1.026
CLCN7_MOUSE	(O70496) H(+)/Cl(-) exchange transporter 7	1.052	1.558	1.222	0.88	1.02	0.976
CALB2_MOUSE	(Q08331) Calretinin	1.233	0.903	2.677	1.581	1.279	1.992
CDIPT_MOUSE	(Q8VDP6) CDP-diacylglycerol--inositol 3-phosphatidyltransferase	0.953	1.097	1.134	0.943	1.091	1.119
RGRF2_MOUSE	(P70392) Ras-specific guanine nucleotide-releasing factor 2	0.875	0.819	0.432	0.885	0.599	0.928
RL9_MOUSE	(P51410) 60S ribosomal protein L9	0.952	0.794	0.947	0.55	0.857	1.094
CPT2_MOUSE	(P52825) Carnitine O-palmitoyltransferase 2, mitochondrial	0.995	1.133	0.952	1.158	0.993	0.949
BGAL_MOUSE	(P23780) Beta-galactosidase	0.809	1.087	1.202	0.754	0.824	0.966
TBC24_MOUSE	(Q3UUG6) TBC1 domain family member 24	1.003	0.818	0.875	1.05	1.076	1.078
FAK2_MOUSE	(Q9QVP9) Protein-tyrosine kinase 2-beta	1.03	0.952	0.994	1.099	1.217	1.194
NB5R1_MOUSE	(Q9DB73) NADH-cytochrome b5 reductase 1	1.062	0.811	0.807	0.977	1.13	0.965
IF4G3_MOUSE	(Q80XI3) Eukaryotic translation initiation factor 4 gamma 3	0.92	1.123	0.895	0.832	0.971	1.006
PENK_MOUSE	(P22005) Proenkephalin-A	0.836	0.99	0.991	1.195	0.886	0.963
PAG15_MOUSE	(Q8VEB4) Group XV phospholipase A2	0.964	1.158	0.892	0.678	0.881	0.836
FGF1_MOUSE	(P61148) Fibroblast growth factor 1	1.06	0.933	0.841	1.089	0.9	1.054
UBE3A_MOUSE	(O08759) Ubiquitin-protein ligase E3A	1.087	1.159	1.101	1.132	1.072	1.241
KIF3B_MOUSE	(Q61771) Kinesin-like protein KIF3B	0.946	0.902	1.01	0.966	1.017	1.101
MADD_MOUSE	(Q80U28) MAP kinase-activating death domain protein	0.983	1.076	1.452	1.127	1.116	2.895
GFAP_MOUSE	(P03995) Glial fibrillary acidic protein	0.974	1.127	0.793	0.908	0.932	0.905
NDUBB_MOUSE	(O09111) NADH dehydrogenase [ubiquinone] 1 beta subcomplex subunit 11, mitochondrial	0.949	0.851	0.571	0.785	0.757	0.753
CMGA_MOUSE	(P26339) Chromogranin-A	1.047	1.087	0.911	0.945	0.922	0.97
COX5B_MOUSE	(P19536) Cytochrome c oxidase subunit 5B, mitochondrial	0.903	0.919	0.543	0.609	0.794	0.65
DPP6_MOUSE	(Q9Z218) Dipeptidyl aminopeptidase-like protein 6	1.193	0.803	1.01	0.933	1.089	1.053
RBGPR_MOUSE	(Q8BMG7) Rab3 GTPase-activating protein non-catalytic subunit	1.07	1.111	1.069	0.972	0.981	0.999
PUR9_MOUSE	(Q9CWJ9) Bifunctional purine biosynthesis protein PURH	1.036	0.981	1.207	1.237	0.985	0.932
RL19_MOUSE	(P84099) 60S ribosomal protein L19	0.901	1.003	1.015	0.652	0.953	1.076
DHRS1_MOUSE	(Q99L04) Dehydrogenase/reductase SDR family member 1	1.041	1.086	1.33	0.976	1.126	0.979
RT22_MOUSE	(Q9CXW2) 28S ribosomal protein S22, mitochondrial	1.018	1.771	0.927	1.097	1.055	1.097
XPP1_MOUSE	(Q6P1B1) Xaa-Pro aminopeptidase 1	1.167	1.239	1.268	1.161	1.215	1.068
NRCAM_MOUSE	(Q810U4) Neuronal cell adhesion molecule	0.935	1.179	1.049	0.862	1.002	0.847
TMX1_MOUSE	(Q8VBT0) Thioredoxin-related transmembrane protein 1	0.874	1.057	1.101	0.803	0.919	0.948
MRP_MOUSE	(P28667) MARCKS-related protein	1.027	1.329	1.088	1.06	0.898	0.774
ZDH13_MOUSE	(Q9CWU2) Palmitoyltransferase ZDHHC13	1.086	1.066	1.054	0.599	0.836	0.844
ADT2_MOUSE	(P51881) ADP/ATP translocase 2	1.051	0.919	0.875	0.948	1.057	0.792
ECHM_MOUSE	(Q8BH95) Enoyl-CoA hydratase, mitochondrial	0.965	1.131	1.257	1.188	1.167	0.973
S4A4_MOUSE	(O88343) Electrogenic sodium bicarbonate cotransporter 1	0.829	0.673	0.999	0.798	0.847	1.156
PACR_MOUSE	(P70205) Pituitary adenylate cyclase-activating polypeptide type I receptor	1.798	1.304	2.343	1.508	1.51	1.634
GABR1_MOUSE	(Q9WV18) Gamma-aminobutyric acid type B receptor subunit 1	1.266	0.98	1.236	0.926	1.058	0.799
MP2K6_MOUSE	(P70236) Dual specificity mitogen-activated protein kinase kinase 6	1.04	1.026	1.113	1.154	0.845	0.907
GBG4_MOUSE	(P50153) Guanine nucleotide-binding protein G(I)/G(S)/G(O) subunit gamma-4	1.201	1.148	1.302	0.891	0.81	1.065
VPS16_MOUSE	(Q920Q4) Vacuolar protein sorting-associated protein 16 homolog	0.641	0.825	0.649	0.625	0.64	0.673
IF4G1_MOUSE	(Q6NZJ6) Eukaryotic translation initiation factor 4 gamma 1	1.036	1.084	1.164	0.791	1.006	0.989
FERM2_MOUSE	(Q8CIB5) Fermitin family homolog 2	1.17	1.303	1.349	1.064	1.122	0.917
PRDX1_MOUSE	(P35700) Peroxiredoxin-1	0.972	1.038	0.928	0.928	0.951	0.885
NUCL_MOUSE	(P09405) Nucleolin	0.851	1.515	0.885	1.309	1.354	1.53
K6PL_MOUSE	(P12382) 6-phosphofructokinase, liver type	1.042	1.301	1.179	1.135	1.102	1.222
USMG5_MOUSE	(Q78IK2) Up-regulated during skeletal muscle growth protein 5	0.86	0.856	0.833	1.017	0.904	1.058
BIEA_MOUSE	(Q9CY64) Biliverdin reductase A	0.955	1.01	1.102	0.96	1.029	1.071
RB27B_MOUSE	(Q99P58) Ras-related protein Rab-27B	1.026	1.065	1.311	1.053	0.978	1.034
SRC_MOUSE	(P05480) Neuronal proto-oncogene tyrosine-protein kinase Src	0.986	1.036	1.01	0.968	1.042	1.095
NLTP_MOUSE	(P32020) Non-specific lipid-transfer protein	0.959	0.796	1.247	0.983	0.989	0.762
ABRAL_MOUSE	(Q4KML4) Costars family protein ABRACL	1.03	1.021	1.067	1.194	0.957	1.202
PSA1_MOUSE	(Q9R1P4) Proteasome subunit alpha type-1	1.231	1.2	1.053	1.27	1.245	1.513
HDDC2_MOUSE	(Q3SXD3) HD domain-containing protein 2	0.87	1.442	0.911	0.981	1.065	1.032
MESD_MOUSE	(Q9ERE7) LDLR chaperone MESD	0.835	1.028	0.79	0.51	0.759	0.862
CYTM1_MOUSE	(Q8K353) Cysteine-rich and transmembrane domain-containing protein 1	1.17	0.753	0.822	1.199	1.164	0.987
VAPB_MOUSE	(Q9QY76) Vesicle-associated membrane protein-associated protein B	0.962	1.147	1.218	0.802	0.993	0.916
DC1L2_MOUSE	(Q6PDL0) Cytoplasmic dynein 1 light intermediate chain 2	1.079	1.029	1.027	0.897	1.077	1.063
SGIP1_MOUSE	(Q8VD37) SH3-containing GRB2-like protein 3-interacting protein 1	0.98	1.091	1.126	1.077	1.035	1.118
BIG1_MOUSE	(G3X9K3) Brefeldin A-inhibited guanine nucleotide-exchange protein 1	1.228	0.937	1.026	0.993	1.142	1.06
FAM3C_MOUSE	(Q91VU0) Protein FAM3C	0.984	0.997	1.114	0.518	0.839	0.818
HSDL2_MOUSE	(Q2TPA8) Hydroxysteroid dehydrogenase-like protein 2	1.053	1.039	1.127	1.175	1.122	0.957
TOM34_MOUSE	(Q9CYG7) Mitochondrial import receptor subunit TOM34	0.929	1.051	0.814	0.929	0.924	0.863
FLOT1_MOUSE	(O08917) Flotillin-1	1.094	0.486	1.316	1.221	0.903	0.853
PEA15_MOUSE	(Q62048) Astrocytic phosphoprotein PEA-15	1.003	0.863	0.856	1.079	0.815	1.01
FKBP4_MOUSE	(P30416) Peptidyl-prolyl cis-trans isomerase FKBP4	0.83	1.017	0.658	0.77	0.724	0.819
RL23_MOUSE	(P62830) 60S ribosomal protein L23	1.094	0.998	0.933	0.673	1.055	1.11
GDIR2_MOUSE	(Q61599) Rho GDP-dissociation inhibitor 2	1.626	5.16	1.499	1.474	2.172	1.969
ACSL6_MOUSE	(Q91WC3) Long-chain-fatty-acid--CoA ligase 6	1.33	1.296	2.832	1.259	1.017	1.063
PRS8_MOUSE	(P62196) 26S protease regulatory subunit 8	0.926	1.14	1.019	1.057	1.047	1.068
AL1B1_MOUSE	(Q9CZS1) Aldehyde dehydrogenase X, mitochondrial	0.842	0.992	0.948	0.984	0.891	0.844
RS7_MOUSE	(P62082) 40S ribosomal protein S7	1.066	0.986	1.581	0.743	1.159	1.577
IF4B_MOUSE	(Q8BGD9) Eukaryotic translation initiation factor 4B	0.71	0.723	0.772	0.706	0.76	0.75
CHID1_MOUSE	(Q922Q9) Chitinase domain-containing protein 1	1.048	1.183	1.059	0.639	0.941	0.961
SV2C_MOUSE	(Q69ZS6) Synaptic vesicle glycoprotein 2C	1.12	1.049	1.087	1.19	1.308	1.023
TRIM9_MOUSE	(Q8C7M3) E3 ubiquitin-protein ligase TRIM9	0.946	0.894	0.987	0.858	0.977	0.976
PSMD9_MOUSE	(Q9CR00) 26S proteasome non-ATPase regulatory subunit 9	2.297	2.367	2.299	2.361	2.18	2.208
NDRG2_MOUSE	(Q9QYG0) Protein NDRG2	1.016	1.056	1.092	1.094	1.032	1.008
STXB3_MOUSE	(Q60770) Syntaxin-binding protein 3	0.971	0.879	1.224	0.909	1.038	0.956
BDH_MOUSE	(Q80XN0) D-beta-hydroxybutyrate dehydrogenase, mitochondrial	1.002	1.129	1.223	1.268	1.265	1.122
MBLC2_MOUSE	(Q8BL86) Metallo-beta-lactamase domain-containing protein 2	1.005	1.01	0.978	1.016	0.944	1.017
OSBL1_MOUSE	(Q91XL9) Oxysterol-binding protein-related protein 1	1.125	1.075	1.083	1.221	1.032	1.261
DLG2_MOUSE	(Q91XM9) Disks large homolog 2	0.978	0.814	0.962	0.945	0.972	1.099
SPE39_MOUSE	(Q8BGQ1) Spermatogenesis-defective protein 39 homolog	0.818	0.984	1.043	1.079	0.919	0.971
EFNB3_MOUSE	(O35393) Ephrin-B3	0.956	1.021	0.949	0.905	1.084	0.915
LPPR4_MOUSE	(Q7TME0) Lipid phosphate phosphatase-related protein type 4	1.082	0.784	1.054	0.766	0.827	0.742
GNL1_MOUSE	(P36916) Guanine nucleotide-binding protein-like 1	0.988	0.865	1.279	0.778	1.025	1.19
MANF_MOUSE	(Q9CXI5) Mesencephalic astrocyte-derived neurotrophic factor	0.953	0.978	0.844	0.69	0.94	0.94
MTCH2_MOUSE	(Q791V5) Mitochondrial carrier homolog 2	0.986	1.099	1.051	0.989	1.09	1.09
TCTP_MOUSE	(P63028) Translationally-controlled tumor protein	1.133	0.741	0.842	0.923	0.813	0.913
PPR1B_MOUSE	(Q60829) Protein phosphatase 1 regulatory subunit 1B	0.852	0.932	1.304	1.098	0.944	0.914
VPS51_MOUSE	(Q3UVL4) Vacuolar protein sorting-associated protein 51 homolog	1.001	0.862	1.006	0.923	1.131	1.117
HEM6_MOUSE	(P36552) Coproporphyrinogen-III oxidase, mitochondrial	1.028	0.992	1.001	0.861	0.858	0.821
NMRL1_MOUSE	(Q8K2T1) NmrA-like family domain-containing protein 1	0.881	0.997	0.931	0.997	0.85	0.887
HGS_MOUSE	(Q99LI8) Hepatocyte growth factor-regulated tyrosine kinase substrate	0.975	1.084	0.965	1.122	0.918	1.038
CAPR1_MOUSE	(Q60865) Caprin-1	0.774	0.905	0.895	0.685	1.039	0.905
GRAP1_MOUSE	(Q8VD04) GRIP1-associated protein 1	1.023	0.826	0.964	1.072	0.991	1.108
PTMS_MOUSE	(Q9D0J8) Parathymosin	1.076	1.015	0.955	1.033	0.998	1.017
NDEL1_MOUSE	(Q9ERR1) Nuclear distribution protein nudE-like 1	0.828	0.889	0.98	0.878	0.797	0.852
EXOC3_MOUSE	(Q6KAR6) Exocyst complex component 3	0.921	1.185	1.006	0.929	0.952	1.068
RM43_MOUSE	(Q99N89) 39S ribosomal protein L43, mitochondrial	1.055	1.16	1.117	1.367	1.016	0.872
RS3A_MOUSE	(P97351) 40S ribosomal protein S3a	0.919	0.791	0.839	0.474	0.878	1.178
LPP3_MOUSE	(Q99JY8) Lipid phosphate phosphohydrolase 3	1.055	0.977	1.186	0.806	1.109	0.773
ERO1A_MOUSE	(Q8R180) ERO1-like protein alpha	0.919	1.075	0.991	0.689	0.88	0.869
DJC11_MOUSE	(Q5U458) DnaJ homolog subfamily C member 11	1.128	0.873	0.772	0.99	1.025	0.956
NDUV3_MOUSE	(Q8BK30) NADH dehydrogenase [ubiquinone] flavoprotein 3, mitochondrial	0.815	0.991	0.692	0.729	0.905	0.741
VAS1_MOUSE	(Q9R1Q9) V-type proton ATPase subunit S1	0.894	0.954	1.05	0.99	1.401	0.947
GALT2_MOUSE	(Q6PB93) Polypeptide N-acetylgalactosaminyltransferase 2	0.989	0.826	1.16	0.527	0.963	0.981
ASAP1_MOUSE	(Q9QWY8) Arf-GAP with SH3 domain, ANK repeat and PH domain-containing protein 1	0.755	0.986	0.802	0.84	0.877	1.069
ERP44_MOUSE	(Q9D1Q6) Endoplasmic reticulum resident protein 44	0.882	1.275	0.798	0.628	0.781	0.822
TIPRL_MOUSE	(Q8BH58) TIP41-like protein	0.872	0.985	1.086	0.985	0.905	1.057
YKT6_MOUSE	(Q9CQW1) Synaptobrevin homolog YKT6	0.961	0.853	0.801	1.092	1.063	1.016
RFIP5_MOUSE	(Q8R361) Rab11 family-interacting protein 5	0.841	0.833	0.815	0.84	0.921	0.825
RL3_MOUSE	(P27659) 60S ribosomal protein L3	0.869	0.728	0.945	0.702	0.993	1.212
AP3M2_MOUSE	(Q8R2R9) AP-3 complex subunit mu-2	1.209	1.006	1.259	1.594	1.168	1.258
EXOC1_MOUSE	(Q8R3S6) Exocyst complex component 1	0.934	0.993	1.021	0.989	1.037	1.031
FLOT2_MOUSE	(Q60634) Flotillin-2	1.158	0.744	1.157	1.096	0.804	0.784
BASI_MOUSE	(P18572) Basigin	1.081	0.917	1.184	0.96	1.035	0.903
EFGM_MOUSE	(Q8K0D5) Elongation factor G, mitochondrial	0.925	0.94	0.856	0.967	0.906	0.724
EPN4_MOUSE	(Q99KN9) Clathrin interactor 1	0.821	1.014	1.089	0.957	0.89	1.013
EI3JA_MOUSE	(Q3UGC7) Eukaryotic translation initiation factor 3 subunit J-A	0.99	0.921	0.779	0.985	0.943	1.063
NB5R3_MOUSE	(Q9DCN2) NADH-cytochrome b5 reductase 3	1.011	1.296	1.169	0.962	1.047	1.052
EIF3A_MOUSE	(P23116) Eukaryotic translation initiation factor 3 subunit A	1.263	1.491	0.968	1.022	1.05	1.061
RL26_MOUSE	(P61255) 60S ribosomal protein L26	0.842	0.976	0.859	0.499	0.808	0.987
BTBDH_MOUSE	(Q9DB72) BTB/POZ domain-containing protein 17	0.924	0.957	1.049	0.918	1.031	0.94
SYG_MOUSE	(Q9CZD3) Glycine--tRNA ligase	0.99	1.235	1.327	1.115	1.216	1.319
HIP1R_MOUSE	(Q9JKY5) Huntingtin-interacting protein 1-related protein	0.914	0.957	0.859	0.855	0.832	0.873
CS025_MOUSE	(Q9D7E4) UPF0449 protein C19orf25 homolog	1.399	1.319	1.463	0.939	1.598	1.196
VCIP1_MOUSE	(Q8CDG3) Deubiquitinating protein VCIP135	0.937	1.162	1.199	1.332	1.107	1.272
SRGP2_MOUSE	(Q91Z67) SLIT-ROBO Rho GTPase-activating protein 2	0.984	0.953	0.86	0.979	0.91	1.018
P33MX_MOUSE	(Q9DBN4) Putative monooxygenase p33MONOX	1.065	0.734	1.168	0.773	0.61	0.749
RAB4A_MOUSE	(P56371) Ras-related protein Rab-4A	1.08	1.035	1.205	1.039	1.054	1.088
VTI1A_MOUSE	(O89116) Vesicle transport through interaction with t-SNAREs homolog 1A	0.893	0.876	0.832	0.873	0.827	0.87
CSK21_MOUSE	(Q60737) Casein kinase II subunit alpha	1.189	0.966	0.907	0.977	1.039	1.009
SHRM2_MOUSE	(A2ALU4) Protein Shroom2	0.705	0.688	0.894	0.814	0.786	0.579
FAAA_MOUSE	(P35505) Fumarylacetoacetase	0.912	1.063	1.268	1.214	1.018	1.195
RS18_MOUSE	(P62270) 40S ribosomal protein S18	0.864	0.89	0.989	0.734	0.934	1.146
IQEC1_MOUSE	(Q8R0S2) IQ motif and SEC7 domain-containing protein 1	0.968	0.798	0.841	0.987	0.96	0.966
NBEA_MOUSE	(Q9EPN1) Neurobeachin	1.016	0.995	1.138	1.073	0.927	1.346
RS8_MOUSE	(P62242) 40S ribosomal protein S8	0.795	0.803	0.713	0.572	0.832	1.074
LR16C_MOUSE	(Q3V3V9) Leucine-rich repeat-containing protein 16C	0.806	0.692	1.019	0.864	0.982	1.189
PANK4_MOUSE	(Q80YV4) Pantothenate kinase 4	0.757	0.878	0.705	0.797	0.821	0.832
LPPR3_MOUSE	(Q7TPB0) Lipid phosphate phosphatase-related protein type 3	1.094	0.85	1.053	0.93	0.952	0.817
VPS28_MOUSE	(Q9D1C8) Vacuolar protein sorting-associated protein 28 homolog	0.898	1.075	1.054	0.84	1.088	1.198
ARHG2_MOUSE	(Q60875) Rho guanine nucleotide exchange factor 2	0.982	1.187	0.935	0.742	0.976	1.002
TALDO_MOUSE	(Q93092) Transaldolase	1.029	1.082	0.973	0.948	0.828	0.93
RAB35_MOUSE	(Q6PHN9) Ras-related protein Rab-35	1.006	0.767	0.944	1.011	1.07	0.947
NIT2_MOUSE	(Q9JHW2) Omega-amidase NIT2	1.288	1.088	1.182	1.087	1.136	1.159
AKA12_MOUSE	(Q9WTQ5) A-kinase anchor protein 12	1.034	0.755	1.172	0.966	0.882	1.364
LKHA4_MOUSE	(P24527) Leukotriene A-4 hydrolase	0.829	1.197	1.09	1.002	1.029	0.85
IDHG1_MOUSE	(P70404) Isocitrate dehydrogenase [NAD] subunit gamma 1, mitochondrial	1.135	1.238	1.088	1.195	1.084	0.853
HINT1_MOUSE	(P70349) Histidine triad nucleotide-binding protein 1	1.036	1.066	1.31	1.154	1.071	1.153
ETBR2_MOUSE	(Q99JG2) Endothelin B receptor-like protein 2	1.002	0.967	1.754	0.677	0.796	0.655
KKCC2_MOUSE	(Q8C078) Calcium/calmodulin-dependent protein kinase kinase 2	1.012	1.105	1.021	1.095	0.974	1.083
SAC1_MOUSE	(Q9EP69) Phosphatidylinositide phosphatase SAC1	1.072	0.934	0.8	1.114	0.966	1.117
UCHL1_MOUSE	(Q9R0P9) Ubiquitin carboxyl-terminal hydrolase isozyme L1	0.901	0.91	1.041	0.946	0.862	0.907
CIA30_MOUSE	(Q9CWX2) Complex I intermediate-associated protein 30, mitochondrial	0.945	0.878	0.755	1.156	0.932	0.895
SYVC_MOUSE	(Q9Z1Q9) Valine--tRNA ligase	0.912	0.927	0.911	0.995	1.004	1.024
FLOWR_MOUSE	(Q8BG21) Calcium channel flower homolog	1.164	0.603	1.264	0.802	0.757	1.139
RS19_MOUSE	(Q9CZX8) 40S ribosomal protein S19	0.838	1.031	1.032	0.574	0.924	1.106
TOM1_MOUSE	(O88746) Target of Myb protein 1	0.991	1.381	0.992	1.047	0.831	0.953
COA3_MOUSE	(Q9D2R6) Cytochrome c oxidase assembly protein 3 homolog, mitochondrial	1.047	1.158	1.013	1.232	1.34	1.141
CYGB_MOUSE	(Q9CX80) Cytoglobin	0.963	1.003	1.179	1.154	0.957	0.983
PPIF_MOUSE	(Q99KR7) Peptidyl-prolyl cis-trans isomerase F, mitochondrial	0.903	0.74	0.842	1.124	0.799	0.764
RALB_MOUSE	(Q9JIW9) Ras-related protein Ral-B	1.017	0.95	1.525	1.826	1	0.941
NCLN_MOUSE	(Q8VCM8) Nicalin	0.76	1.05	0.903	0.529	0.827	0.895
PLCX3_MOUSE	(Q8BLJ3) PI-PLC X domain-containing protein 3	1.203	0.923	1.621	0.846	0.71	1.284
GCYA3_MOUSE	(Q9ERL9) Guanylate cyclase soluble subunit alpha-3	1.049	0.969	1.16	1.366	0.999	1.227
P5CS_MOUSE	(Q9Z110) Delta-1-pyrroline-5-carboxylate synthase	0.961	1.082	1.026	1.051	0.892	0.911
MCU_MOUSE	(Q3UMR5) Calcium uniporter protein, mitochondrial	0.805	0.999	0.87	0.859	1.02	0.882
HID1_MOUSE	(Q8R1F6) Protein HID1	1.051	1.05	1.033	0.855	0.909	0.848
MOGS_MOUSE	(Q80UM7) Mannosyl-oligosaccharide glucosidase	0.928	0.93	0.971	0.736	1.026	1.008
APOD_MOUSE	(P51910) Apolipoprotein D	0.766	0.951	1.987	0.69	1.13	0.794
PPID_MOUSE	(Q9CR16) Peptidyl-prolyl cis-trans isomerase D	1.517	1.135	1.192	1.271	1.212	1.373
GAS7_MOUSE	(Q60780) Growth arrest-specific protein 7	1.083	1.039	3.202	0.881	1.39	1.756
SORC3_MOUSE	(Q8VI51) VPS10 domain-containing receptor SorCS3	1.327	1.422	1.042	1.234	1.243	1.091
TPPC3_MOUSE	(O55013) Trafficking protein particle complex subunit 3	0.962	1.185	1.317	0.961	1.033	1.012
RT31_MOUSE	(Q61733) 28S ribosomal protein S31, mitochondrial	1.253	0.843	0.936	1.031	1.007	1.143
TM109_MOUSE	(Q3UBX0) Transmembrane protein 109	0.763	1.139	0.863	0.695	0.893	0.836
CCD58_MOUSE	(Q8R3Q6) Coiled-coil domain-containing protein 58	1.079	0.804	0.946	1.095	0.93	0.861
UBL4A_MOUSE	(P21126) Ubiquitin-like protein 4A	0.96	1.085	1.337	0.949	0.92	0.943
ACAP2_MOUSE	(Q6ZQK5) Arf-GAP with coiled-coil, ANK repeat and PH domain-containing protein 2	1.077	0.808	1.023	0.845	0.822	0.834
GPM6B_MOUSE	(P35803) Neuronal membrane glycoprotein M6-b	0.912	0.822	1.001	0.796	0.98	0.808
SCRN2_MOUSE	(Q8VCA8) Secernin-2	0.952	0.96	0.919	1.13	1.032	1.003
GMPR1_MOUSE	(Q9DCZ1) GMP reductase 1	0.9	1.064	1.091	1.074	0.936	0.936
SCMC2_MOUSE	(A2ASZ8) Calcium-binding mitochondrial carrier protein SCaMC-2	1.056	1.039	0.903	1.091	0.906	0.826
ARSA_MOUSE	(P50428) Arylsulfatase A	0.745	0.94	0.873	0.553	0.653	0.618
DAD1_MOUSE	(P61804) Dolichyl-diphosphooligosaccharide--protein glycosyltransferase subunit DAD1	0.902	1.17	0.924	0.686	1.052	1.105
KAP1_MOUSE	(P12849) cAMP-dependent protein kinase type I-beta regulatory subunit	0.95	1.001	1.069	0.879	1.177	1.058
DNJB2_MOUSE	(Q9QYI5) DnaJ homolog subfamily B member 2	0.796	0.844	0.735	0.764	1.072	1.275
ACSL1_MOUSE	(P41216) Long-chain-fatty-acid--CoA ligase 1	0.945	0.923	1.026	0.932	0.963	0.849
UBP14_MOUSE	(Q9JMA1) Ubiquitin carboxyl-terminal hydrolase 14	1.004	1.212	1.044	0.988	1.276	1.089
EF1A2_MOUSE	(P62631) Elongation factor 1-alpha 2	0.865	1.018	0.847	1.107	1.134	1.053
FUMH_MOUSE	(P97807) Fumarate hydratase, mitochondrial	0.976	1.061	0.731	1.152	0.96	0.938
TBB1_MOUSE	(A2AQ07) Tubulin beta-1 chain	1.011	1.035	1.16	1.014	0.962	1.06
RM49_MOUSE	(Q9CQ40) 39S ribosomal protein L49, mitochondrial	0.87	0.826	0.711	1.061	0.815	0.829
FNBP1_MOUSE	(Q80TY0) Formin-binding protein 1	1.039	1.03	1.147	0.995	0.995	0.966
ROBO2_MOUSE	(Q7TPD3) Roundabout homolog 2	1.262	0.965	1.077	0.912	1.035	1.009
MY18A_MOUSE	(Q9JMH9) Unconventional myosin-XVIIIa	0.998	1.095	0.954	0.974	1.126	1.11
SDC4_MOUSE	(O35988) Syndecan-4	1.195	0.925	1.471	1.21	1.287	1.178
ACSF2_MOUSE	(Q8VCW8) Acyl-CoA synthetase family member 2, mitochondrial	0.895	0.95	1.009	1.298	0.934	0.921
VPS18_MOUSE	(Q8R307) Vacuolar protein sorting-associated protein 18 homolog	0.864	1.182	1.008	0.805	0.972	1.089
CNR1_MOUSE	(P47746) Cannabinoid receptor 1	1.492	0.441	1.486	1.145	0.538	0.385
PSB1_MOUSE	(O09061) Proteasome subunit beta type-1	1.198	0.972	1.232	1.392	0.932	1.029
DAAM1_MOUSE	(Q8BPM0) Disheveled-associated activator of morphogenesis 1	1.123	1.006	1.03	1.03	1.024	1.123
RLA1_MOUSE	(P47955) 60S acidic ribosomal protein P1	0.886	0.809	1.026	0.636	0.757	0.715
AOFA_MOUSE	(Q64133) Amine oxidase [flavin-containing] A	0.916	0.829	0.792	0.97	0.92	0.831
RL37_MOUSE	(Q9D823) 60S ribosomal protein L37	1.166	1.378	1.392	0.997	1.147	1.186
BAG6_MOUSE	(Q9Z1R2) Large proline-rich protein BAG6	1.571	1.231	5.719	1.149	1.305	1.522
ARHG7_MOUSE	(Q9ES28) Rho guanine nucleotide exchange factor 7	0.94	1.093	1.022	0.938	0.982	1.012
ERC2_MOUSE	(Q6PH08) ERC protein 2	1.244	0.747	1.113	0.877	0.903	0.982
OXSR1_MOUSE	(Q6P9R2) Serine/threonine-protein kinase OSR1	1.024	0.779	1.536	1.236	1.364	1.326
RM04_MOUSE	(Q9DCU6) 39S ribosomal protein L4, mitochondrial	0.971	1.33	1.027	1.088	0.998	0.828
DPM1_MOUSE	(O70152) Dolichol-phosphate mannosyltransferase	0.916	0.968	1.005	0.813	0.974	0.874
F126B_MOUSE	(Q8C729) Protein FAM126B	1.095	0.981	1.119	0.936	1.138	1.102
RAB8B_MOUSE	(P61028) Ras-related protein Rab-8B	2.309	1.082	1.314	1.27	1.991	2.328
EVL_MOUSE	(P70429) Ena/VASP-like protein	1.143	0.895	1.905	1.128	0.886	0.981
KCNC1_MOUSE	(P15388) Potassium voltage-gated channel subfamily C member 1	1.145	1.06	1.309	1.092	1.051	1.063
PCYOX_MOUSE	(Q9CQF9) Prenylcysteine oxidase	1.413	1.32	1.35	1.367	1.391	1.342
IF1AX_MOUSE	Eukaryotic translation initiation factor 1A, X-chromosomal OS=Mus musculus GN=Eif1ax PE=2 SV=3	0.914	0.807	0.984	0.836	0.848	1.013
SYT3_MOUSE	(O35681) Synaptotagmin-3	1.211	1.01	1.184	1.263	1.166	1.145
BRSK1_MOUSE	(Q5RJI5) Serine/threonine-protein kinase BRSK1	1.12	0.92	1.08	0.963	1.005	1.159
VATD_MOUSE	(P57746) V-type proton ATPase subunit D	1.052	0.79	0.866	0.936	0.864	1.213
ATAD3_MOUSE	(Q925I1) ATPase family AAA domain-containing protein 3	1.153	1.275	1.046	1.021	1.099	0.91
ESYT2_MOUSE	(Q3TZZ7) Extended synaptotagmin-2	1.116	1.445	0.922	1.253	1.157	1.529
ADCY5_MOUSE	(P84309) Adenylate cyclase type 5	1.093	1.005	1.165	1.077	1.092	0.996
NCKP1_MOUSE	(P28660) Nck-associated protein 1	1.099	1.066	1.247	1.118	1.231	1.175
CRTC1_MOUSE	(Q68ED7) CREB-regulated transcription coactivator 1	0.859	0.678	0.792	0.976	0.571	0.985
RL10A_MOUSE	(P53026) 60S ribosomal protein L10a	1.03	0.94	0.962	0.637	0.943	1.164
ICAM5_MOUSE	(Q60625) Intercellular adhesion molecule 5	1.178	0.835	1.12	0.823	1.026	0.906
TNPO1_MOUSE	(Q8BFY9) Transportin-1	1.141	1.065	0.912	0.643	0.606	0.761
GATM_MOUSE	(Q9D964) Glycine amidinotransferase, mitochondrial	1.256	1.974	1.636	1.163	0.927	1.026
GLRX1_MOUSE	Glutaredoxin-1 OS=Mus musculus GN=Glrx PE=1 SV=3	1.045	0.923	1.25	1.161	1.124	1.492
VTA1_MOUSE	(Q9CR26) Vacuolar protein sorting-associated protein VTA1 homolog	0.985	0.955	1.032	0.902	0.9	0.876
PTEN_MOUSE	(O08586) Phosphatidylinositol 3,4,5-trisphosphate 3-phosphatase and dual-specificity protein phosphatase PTEN	1.062	1.248	1.142	1.273	1.163	1.118
IF6_MOUSE	(O55135) Eukaryotic translation initiation factor 6	1.171	1.306	1.529	0.917	1.506	1.636
AGM1_MOUSE	(Q9CYR6) Phosphoacetylglucosamine mutase	1.073	1.13	1.127	1.054	0.996	1.298
STK24_MOUSE	(Q99KH8) Serine/threonine-protein kinase 24	1.244	0.891	0.876	0.948	0.98	0.892
OCRL_MOUSE	(Q6NVF0) Inositol polyphosphate 5-phosphatase OCRL-1	0.761	0.51	0.673	0.858	0.992	0.865
SC6A1_MOUSE	(P31648) Sodium- and chloride-dependent GABA transporter 1	0.897	1.039	0.872	0.998	0.802	0.903
PPME1_MOUSE	(Q8BVQ5) Protein phosphatase methylesterase 1	1.038	0.991	0.989	1.039	1.104	1.156
IF5_MOUSE	(P59325) Eukaryotic translation initiation factor 5	0.886	1.141	1.002	1.071	1.09	1.015
ATP9B_MOUSE	(P98195) Probable phospholipid-transporting ATPase IIB	1.402	0.907	1.543	0.807	0.926	1.275
GLTP_MOUSE	(Q9JL62) Glycolipid transfer protein	1.337	1.192	1.646	0.704	0.84	0.982
PSMD5_MOUSE	(Q8BJY1) 26S proteasome non-ATPase regulatory subunit 5	0.875	0.922	1.093	1.096	0.919	1.049
SPG7_MOUSE	(Q3ULF4) Paraplegin	1.155	1.11	2.162	1.203	0.967	0.992
GPC5_MOUSE	(Q8CAL5) Glypican-5	1.006	0.618	0.826	0.75	0.99	0.952
CAZA1_MOUSE	(P47753) F-actin-capping protein subunit alpha-1	1.181	2.031	1.043	1.21	1.205	1.193
CROCC_MOUSE	(Q8CJ40) Rootletin	1.045	1.043	1.165	0.651	0.85	0.802
UB2D3_MOUSE	Ubiquitin-conjugating enzyme E2 D3 OS=Mus musculus GN=Ube2d3 PE=1 SV=1	1.04	1.122	1.12	1.151	1.123	1.094
NRX1A_MOUSE	(Q9CS84) Neurexin-1	1.13	1.157	1.134	1.249	1.141	1.104
S12A2_MOUSE	(P55012) Solute carrier family 12 member 2	0.933	0.773	0.923	0.863	0.892	0.881
RS11_MOUSE	(P62281) 40S ribosomal protein S11	0.845	0.908	0.785	0.646	0.945	1.016
WDR7_MOUSE	(Q920I9) WD repeat-containing protein 7	1.103	1.108	1.108	1.151	1.241	1.156
COASY_MOUSE	(Q9DBL7) Bifunctional coenzyme A synthase	0.991	0.964	0.958	0.927	0.998	1.027
PA1B2_MOUSE	(Q61206) Platelet-activating factor acetylhydrolase IB subunit beta	0.876	1.02	0.852	1.071	0.856	1.051
LRC59_MOUSE	(Q922Q8) Leucine-rich repeat-containing protein 59	1.017	1.053	1.189	0.664	0.879	1.122
L2GL1_MOUSE	(Q80Y17) Lethal(2) giant larvae protein homolog 1	1.088	1.155	1.062	0.97	0.883	1.073
VIGLN_MOUSE	(Q8VDJ3) Vigilin	0.828	1.076	0.946	0.968	0.824	1.144
RTCB_MOUSE	(Q99LF4) tRNA-splicing ligase RtcB homolog	0.922	1.296	0.885	0.845	1.166	1.168
GNAI3_MOUSE	(Q9DC51) Guanine nucleotide-binding protein G(k) subunit alpha	1.109	1.176	1.071	1.049	1.187	1.138
DGKQ_MOUSE	(Q6P5E8) Diacylglycerol kinase theta	0.928	1.162	0.955	1.073	0.795	1.77
APOA1_MOUSE	(Q00623) Apolipoprotein A-I	1.026	1.124	1.18	0.979	1.314	1.139
CRYM_MOUSE	(O54983) Thiomorpholine-carboxylate dehydrogenase	1.015	1.017	1.245	1.22	1.108	1.228
LNP_MOUSE	(Q7TQ95) Protein lunapark	0.944	0.862	0.816	0.837	0.863	0.926
NSG1_MOUSE	(Q62092) Neuron-specific protein family member 1	1.02	1.154	0.845	0.611	0.86	0.879
RGS17_MOUSE	Regulator of G-protein signaling 17 OS=Mus musculus GN=Rgs17 PE=1 SV=1	1.188	0.922	1.321	1.016	0.992	0.857
AT5G1_MOUSE	ATP synthase lipid-binding protein, mitochondrial OS=Mus musculus GN=Atp5g1 PE=2 SV=1	1.177	0.909	1.053	1.516	0.975	1.051
GAK_MOUSE	(Q99KY4) Cyclin-G-associated kinase	1.097	1.116	1.082	1.214	1.093	1.146
HABP4_MOUSE	(Q9JKS5) Intracellular hyaluronan-binding protein 4	0.783	1.271	1.086	0.643	0.773	0.838
TTYH1_MOUSE	(Q9D3A9) Protein tweety homolog 1	0.757	0.621	0.857	0.638	0.848	0.611
AKA7G_MOUSE	(Q7TN79) A-kinase anchor protein 7 isoform gamma	1.037	1.014	1.109	0.847	1.082	1.07
CHMP7_MOUSE	(Q8R1T1) Charged multivesicular body protein 7	0.853	0.835	1.027	1.109	0.912	0.839
CPT1C_MOUSE	(Q8BGD5) Carnitine O-palmitoyltransferase 1, brain isoform	0.863	1.124	1.497	1.047	0.94	1.076
CALU_MOUSE	(O35887) Calumenin	0.844	0.955	1.014	0.87	0.966	1.076
DDB1_MOUSE	(Q3U1J4) DNA damage-binding protein 1	0.915	0.651	0.68	0.872	0.717	0.812
RHG35_MOUSE	(Q91YM2) Rho GTPase-activating protein 35	1.024	1.244	0.937	0.947	0.999	1.153
SGTB_MOUSE	(Q8VD33) Small glutamine-rich tetratricopeptide repeat-containing protein beta	1.212	0.915	0.912	0.772	1.243	1.202
EIF3G_MOUSE	(Q9Z1D1) Eukaryotic translation initiation factor 3 subunit G	0.743	1.049	1.164	0.785	0.922	0.981
MACD1_MOUSE	(Q922B1) O-acetyl-ADP-ribose deacetylase MACROD1	0.987	0.966	0.838	1.183	1.045	0.804
THEM6_MOUSE	(Q80ZW2) Protein THEM6	1.06	1.043	1.178	0.896	1.058	1.04
TPPC4_MOUSE	(Q9ES56) Trafficking protein particle complex subunit 4	0.801	0.998	1.981	0.852	0.551	0.778
PSA2_MOUSE	Proteasome subunit alpha type-2 OS=Mus musculus GN=Psma2 PE=1 SV=3	1.16	1.317	2.771	2.069	0.943	1.432
NPY_MOUSE	(P57774) Pro-neuropeptide Y	0.876	3.174	0.52	0.719	0.578	0.766
STT3B_MOUSE	Dolichyl-diphosphooligosaccharide--protein glycosyltransferase subunit STT3B OS=Mus musculus GN=Stt3b PE=1 SV=2	0.984	1.227	1.203	0.681	1.054	1.194
SL9A7_MOUSE	(Q8BLV3) Sodium/hydrogen exchanger 7	1.157	1.082	1.077	1.025	0.918	1.126
VWA8_MOUSE	(Q8CC88) von Willebrand factor A domain-containing protein 8	0.919	1.171	1.014	1.173	0.918	0.919
DNJA4_MOUSE	(Q9JMC3) DnaJ homolog subfamily A member 4	1.043	1.06	1.099	0.918	0.939	1.035
SHSA4_MOUSE	(Q8CA71) Protein shisa-4	1.248	1.393	1.024	1.024	1.034	1.039
GRM1B_MOUSE	(Q80TI0) GRAM domain-containing protein 1B	0.901	1.115	1.091	0.809	0.972	0.944
PC4L1_MOUSE	(Q6W8Q3) Purkinje cell protein 4-like protein 1	0.868	0.998	0.779	1.038	0.881	0.901
SNG3_MOUSE	Synaptogyrin-3 OS=Mus musculus GN=Syngr3 PE=1 SV=1	0.941	0.819	0.888	0.947	1.082	0.943
ARMC1_MOUSE	(Q9D7A8) Armadillo repeat-containing protein 1	1.02	0.995	0.981	0.847	1.066	0.884
SNX2_MOUSE	(Q9CWK8) Sorting nexin-2	0.972	0.946	0.719	0.953	1.122	1.251
ULA1_MOUSE	(Q8VBW6) NEDD8-activating enzyme E1 regulatory subunit	0.793	0.907	0.631	0.755	0.741	0.939
F136A_MOUSE	(Q9CR98) Protein FAM136A	0.933	0.805	0.641	0.893	0.813	0.734
CISD3_MOUSE	CDGSH iron-sulfur domain-containing protein 3, mitochondrial OS=Mus musculus GN=Cisd3 PE=2 SV=1	1.096	1.022	0.929	0.747	0.957	0.816
CSPG4_MOUSE	(Q8VHY0) Chondroitin sulfate proteoglycan 4	1.1	1.039	1.285	0.747	0.947	1.013
CRYL1_MOUSE	(Q99KP3) Lambda-crystallin homolog	1.11	1.077	0.993	1.179	0.965	1.015
SYSM_MOUSE	(Q9JJL8) Serine--tRNA ligase, mitochondrial	0.951	0.649	1.074	0.978	0.932	0.717
GBG13_MOUSE	(Q9JMF3) Guanine nucleotide-binding protein G(I)/G(S)/G(O) subunit gamma-13	0.854	1.384	0.927	1.013	1.023	0.934
SEPT2_MOUSE	(P42208) Septin-2	0.862	0.657	0.768	0.701	0.82	0.768
SORL_MOUSE	(O88307) Sortilin-related receptor	0.832	0.93	0.948	0.554	0.775	0.868
TM141_MOUSE	(A2AJB2) Transmembrane protein 141	0.944	1.129	0.826	0.945	0.913	0.829
LIN7C_MOUSE	(O88952) Protein lin-7 homolog C	1.037	0.787	1.128	0.764	0.758	0.803
LY6H_MOUSE	(Q9WUC3) Lymphocyte antigen 6H	0.899	0.888	0.94	0.849	0.852	0.853
TRIO_MOUSE	(Q0KL02) Triple functional domain protein	0.984	0.931	1.048	1.038	0.981	1.179
RNF14_MOUSE	(Q9JI90) E3 ubiquitin-protein ligase RNF14	1.112	1.195	1.102	1.195	1.575	2.321
SERC_MOUSE	(Q99K85) Phosphoserine aminotransferase	1.024	1.186	1.493	1.219	1.311	1.125
PLXB1_MOUSE	(Q8CJH3) Plexin-B1	1.073	0.822	1.128	1.005	0.954	1.056
TIM50_MOUSE	(Q9D880) Mitochondrial import inner membrane translocase subunit TIM50	0.98	1.149	1.033	0.929	0.971	0.812
GOGA3_MOUSE	(P55937) Golgin subfamily A member 3	1.05	3.069	0.837	1.417	1.038	1.132
UB2D2_MOUSE	Ubiquitin-conjugating enzyme E2 D2 OS=Mus musculus GN=Ube2d2 PE=1 SV=1	1.186	1.22	1.134	1.104	1.089	1.088
RT35_MOUSE	(Q8BJZ4) 28S ribosomal protein S35, mitochondrial	0.827	0.827	0.701	0.774	0.877	0.79
SHLB1_MOUSE	(Q9JK48) Endophilin-B1	0.858	0.944	0.834	0.891	0.833	0.728
DCTN3_MOUSE	(Q9Z0Y1) Dynactin subunit 3	1.005	1.156	1.137	1.123	1.107	1.125
PYRG2_MOUSE	CTP synthase 2 OS=Mus musculus GN=Ctps2 PE=1 SV=1	0.74	0.907	1.248	0.858	0.827	0.911
CAD23_MOUSE	(Q99PF4) Cadherin-23	1.093	1.267	1.213	0.98	1.388	1.086
NCPR_MOUSE	(P37040) NADPH--cytochrome P450 reductase	1.701	0.864	1.337	1.244	1.491	1.826
NFH_MOUSE	(P19246) Neurofilament heavy polypeptide	0.777	1.078	0.899	0.846	0.962	0.814
DDX3L_MOUSE	(P16381) Putative ATP-dependent RNA helicase Pl10	0.969	0.859	0.886	0.714	0.909	0.906
FGF12_MOUSE	Fibroblast growth factor 12 OS=Mus musculus GN=Fgf12 PE=2 SV=1	1.063	0.859	1.057	0.95	0.949	0.943
SYNE1_MOUSE	(Q6ZWR6) Nesprin-1	1.126	1.07	1.203	1.008	1.042	0.988
K6PP_MOUSE	(Q9WUA3) 6-phosphofructokinase type C	0.987	0.832	0.701	1.639	1.059	1.482
RAB2A_MOUSE	(P53994) Ras-related protein Rab-2A	1.149	1.147	1.067	0.966	1.037	0.932
STXB6_MOUSE	(Q8R3T5) Syntaxin-binding protein 6	1.066	0.991	1.039	0.857	0.961	0.882
RMD1_MOUSE	(Q9DCV4) Regulator of microtubule dynamics protein 1	0.991	1.066	1.161	1.265	1.122	1.095
MLF2_MOUSE	(Q99KX1) Myeloid leukemia factor 2	0.951	0.877	0.885	0.927	1.34	1.257
FAHD1_MOUSE	(Q8R0F8) Acylpyruvase FAHD1, mitochondrial	1.095	1.114	1.069	1.109	1.205	0.85
SIK3_MOUSE	(Q6P4S6) Serine/threonine-protein kinase SIK3	1.057	0.873	0.922	1.348	1.065	1.217
CPLX1_MOUSE	(P63040) Complexin-1	0.949	0.871	0.97	0.931	0.822	0.896
BAALC_MOUSE	Brain and acute leukemia cytoplasmic protein OS=Mus musculus GN=Baalc PE=2 SV=3	1.041	1.18	0.807	0.833	0.946	0.979
ACO11_MOUSE	(Q8VHQ9) Acyl-coenzyme A thioesterase 11	0.987	1.624	1.694	1.035	1.064	0.818
OLA1_MOUSE	(Q9CZ30) Obg-like ATPase 1	1.126	0.961	0.987	1.183	0.968	0.967
SETD7_MOUSE	(Q8VHL1) Histone-lysine N-methyltransferase SETD7	1.192	0.998	0.899	1.249	0.824	0.957
CAC1B_MOUSE	(O55017) Voltage-dependent N-type calcium channel subunit alpha-1B	1.07	1.078	1.019	0.907	1.093	0.907
R4RL2_MOUSE	(Q7M6Z0) Reticulon-4 receptor-like 2	1.059	0.964	0.953	0.906	1.086	0.9
TM119_MOUSE	(Q8R138) Transmembrane protein 119	1.21	1.332	1.499	0.438	1.038	0.768
CRKL_MOUSE	(P47941) Crk-like protein	0.771	1.077	1.131	0.841	0.8	0.881
T126A_MOUSE	Transmembrane protein 126A OS=Mus musculus GN=Tmem126a PE=2 SV=1	0.638	1.02	0.64	0.774	0.743	0.641
ZC21A_MOUSE	(Q8BJH1) Zinc finger C2HC domain-containing protein 1A	0.992	1.047	1.09	0.893	0.949	0.927
REEP5_MOUSE	(Q60870) Receptor expression-enhancing protein 5	0.903	0.856	0.691	0.962	0.95	0.993
TYB10_MOUSE	Thymosin beta-10 OS=Mus musculus GN=Tmsb10 PE=2 SV=3	0.837	0.991	0.879	0.67	1.094	0.934
MRCKB_MOUSE	(Q7TT50) Serine/threonine-protein kinase MRCK beta	1.222	1.3	1.218	0.944	1.237	1.133
EEA1_MOUSE	(Q8BL66) Early endosome antigen 1	1.035	0.794	0.862	1.082	0.859	0.893
MK08_MOUSE	(Q91Y86) Mitogen-activated protein kinase 8	1	1.033	0.959	1.195	1.064	1.03
MP2K4_MOUSE	(P47809) Dual specificity mitogen-activated protein kinase kinase 4	1.099	1.232	1.077	1.035	1.108	1.087
F131B_MOUSE	(Q3TY60) Protein FAM131B	1.045	1.02	0.949	0.887	1.007	0.941
D39U1_MOUSE	(Q5M8N4) Epimerase family protein SDR39U1	1.761	1.163	1.134	1.493	1.011	1
PLP2_MOUSE	(Q9R1Q7) Proteolipid protein 2	0.972	0.766	5.097	0.694	1.041	0.914
UBE2O_MOUSE	(Q6ZPJ3) Ubiquitin-conjugating enzyme E2 O	0.91	1.273	1.012	1.102	1.025	0.956
TECR_MOUSE	(Q9CY27) Very-long-chain enoyl-CoA reductase	0.775	0.846	0.815	0.687	0.872	0.833
PTN23_MOUSE	(Q6PB44) Tyrosine-protein phosphatase non-receptor type 23	1.063	1.051	1.177	1.159	0.966	1.267
CELF2_MOUSE	CUGBP Elav-like family member 2 OS=Mus musculus GN=Celf2 PE=1 SV=1	0.72	1.077	0.91	0.479	0.817	0.947
UGGG1_MOUSE	(Q6P5E4) UDP-glucose:glycoprotein glucosyltransferase 1	0.863	1.007	0.846	0.813	0.866	1.131
NDUF3_MOUSE	(Q9JKL4) NADH dehydrogenase [ubiquinone] 1 alpha subcomplex assembly factor 3	1.009	1.086	1.084	1.129	1.003	1.083
SHAN2_MOUSE	(Q80Z38) SH3 and multiple ankyrin repeat domains protein 2	0.991	1.296	1.06	0.8	1.085	1.092
FBP1L_MOUSE	(Q8K012) Formin-binding protein 1-like	0.802	0.745	0.957	0.828	0.834	0.93
GABR2_MOUSE	(Q80T41) Gamma-aminobutyric acid type B receptor subunit 2	1.143	1.264	1.272	1.037	0.925	0.911
CYBP_MOUSE	(Q9CXW3) Calcyclin-binding protein	0.947	0.968	0.927	0.911	1.107	0.974
TGON1_MOUSE	(Q62313) Trans-Golgi network integral membrane protein 1	0.904	0.737	0.86	0.507	0.727	0.667
MARE2_MOUSE	(Q8R001) Microtubule-associated protein RP/EB family member 2	1.108	1.243	1.375	1.071	1.178	1.122
EFHA2_MOUSE	(Q9CTY5) EF-hand domain-containing family member A2	0.902	0.972	0.976	0.836	1.169	1.167
IQEC3_MOUSE	(Q3TES0) IQ motif and SEC7 domain-containing protein 3	3.06	3.189	3.618	2.899	3.263	3.337
S12A6_MOUSE	(Q924N4) Solute carrier family 12 member 6	0.864	0.991	0.965	0.794	0.93	0.811
UBP24_MOUSE	(B1AY13) Ubiquitin carboxyl-terminal hydrolase 24	0.951	0.722	5.851	0.423	0.706	0.859
HD_MOUSE	(P42859) Huntingtin	1.666	1.705	1.842	2.089	1.657	1.997
TSTD3_MOUSE	(Q9D0B5) Thiosulfate sulfurtransferase/rhodanese-like domain-containing protein 3	0.896	0.831	1.085	0.98	1.017	1.013
BRSK2_MOUSE	(Q69Z98) Serine/threonine-protein kinase BRSK2	1.054	1.271	1.097	1.158	1.009	1.071
SYTL4_MOUSE	Synaptotagmin-like protein 4 OS=Mus musculus GN=Sytl4 PE=1 SV=1	1.12	0.77	0.725	0.788	0.889	0.768
NEU2_MOUSE	(P35455) Vasopressin-neurophysin 2-copeptin	1.169	1.282	1.549	0.518	1.896	2.31
ECSIT_MOUSE	(Q9QZH6) Evolutionarily conserved signaling intermediate in Toll pathway, mitochondrial	0.995	1.296	0.86	0.958	1.031	0.811
CF057_MOUSE	(Q8BTE0) UPF0369 protein C6orf57 homolog	1.094	1.137	1.01	1.027	1.004	1.019
AKIP1_MOUSE	(Q9JJR5) A-kinase-interacting protein 1	1.184	0.913	1.063	0.965	0.936	0.951
PSA5_MOUSE	(Q9Z2U1) Proteasome subunit alpha type-5	0.922	0.79	1.008	1.043	0.889	0.792
EPN1_MOUSE	(Q80VP1) Epsin-1	1.026	1.274	1.219	1.339	1.275	1.204
ACY1_MOUSE	(Q99JW2) Aminoacylase-1	1.057	1.385	0.835	1.084	1.084	0.903
NDUB3_MOUSE	NADH dehydrogenase [ubiquinone] 1 beta subcomplex subunit 3 OS=Mus musculus GN=Ndufb3 PE=1 SV=1	0.792	0.8	0.522	0.5	0.547	0.54
LONF3_MOUSE	LON peptidase N-terminal domain and RING finger protein 3 OS=Mus musculus GN=Lonrf3 PE=2 SV=1	1.137	1.086	1.261	1.105	1.23	1.17
RN214_MOUSE	(Q8BFU3) RING finger protein 214	1.004	0.84	1.148	0.762	0.949	1.034
AL1A1_MOUSE	(P24549) Retinal dehydrogenase 1	0.935	1.08	1.049	1.12	0.839	0.985
TI17B_MOUSE	(Q9Z0V7) Mitochondrial import inner membrane translocase subunit Tim17-B	1.156	0.884	1.02	1.018	0.963	0.903
RM10_MOUSE	(Q3TBW2) 39S ribosomal protein L10, mitochondrial	0.847	1.013	0.859	0.856	1.039	1.054
IRK6_MOUSE	(P48542) G protein-activated inward rectifier potassium channel 2	1.521	1.314	2.042	1.132	1.151	1.836

## Sheet: Run2
User
E-mail
MS data file
Database	Sprot
Taxonomy	Mus. (16,662 sequences)
Timestamp	17 Apr 2013 at 23:19:09 GMT
Type of search	MS/MS Ion Search
Quantitation	iTRAQ 8plex (Applied Biosystems iTRAQ(TM) 8-plex)
Enzyme	Trypsin
Fixed modifications	iTRAQ8plex (N-term),iTRAQ8plex (K)
Variable modifications	Methylthio (C),Oxidation (M),iTRAQ8plex (Y)
Mass values	Monoisotopic
Protein mass	Unrestricted
Peptide mass tolerance	20 ppm
Fragment mass tolerance	0.2 Da
Max missed cleavages	2
Instrument type	ESI-FTICR
Number of queries	73698
Significance threshold p<	0.01505
Max. number of families	AUTO
Ions score or expect cut-off	0
Preferred taxonomy	All entries
Show Percolator scores?	no
Quantitation parameters:
Protein ratio type	weighted
Normalisation	median
Min. precursor charge	1
Outlier removal	auto
Min. number of peptides	2
Peptide threshold	at least homology
Unique peptides only?	yes
Filters:	(114/113 > 0 AND 115/113 > 0 AND 116/113 > 0 AND 117/113 > 0 AND 118/113 > 0)
Accession	Description	WT/WT_239	WT/WT_246	Mutator_211	Mutator_217	Mutator_249
ATPA_MOUSE	(Q03265) ATP synthase subunit alpha, mitochondrial	1	0.999	0.945	0.925	1.085
ATPB_MOUSE	(P56480) ATP synthase subunit beta, mitochondrial	0.966	1.02	0.911	0.886	1.08
AT1A3_MOUSE	(Q6PIC6) Sodium/potassium-transporting ATPase subunit alpha-3	1.012	0.982	0.992	1.017	0.815
AT1A1_MOUSE	(Q8VDN2) Sodium/potassium-transporting ATPase subunit alpha-1	1.062	0.966	1.023	1.06	0.868
AT1A2_MOUSE	(Q6PIE5) Sodium/potassium-transporting ATPase subunit alpha-2	1.008	1.052	1.119	1.302	0.788
ATP4A_MOUSE	(Q64436) Potassium-transporting ATPase alpha chain 1	0.956	1.035	1.02	1.095	0.746
KPYM_MOUSE	(P52480) Pyruvate kinase isozymes M1/M2	1.024	0.931	1.186	1.08	0.994
KCRB_MOUSE	(Q04447) Creatine kinase B-type	1.121	1.059	0.96	0.977	0.985
TBA1A_MOUSE	(P68369) Tubulin alpha-1A chain	0.933	1.204	0.986	1.062	0.881
TBA4A_MOUSE	(P68368) Tubulin alpha-4A chain	0.903	1.18	0.916	0.993	0.784
SPTN1_MOUSE	(P16546) Spectrin alpha chain, non-erythrocytic 1	1.013	0.956	1	1.103	0.909
STXB1_MOUSE	(O08599) Syntaxin-binding protein 1	0.97	0.878	0.951	1.031	0.868
SPTB2_MOUSE	(Q62261) Spectrin beta chain, non-erythrocytic 1	1.009	1	1.052	1.073	0.918
CALM_MOUSE	(P62204) Calmodulin	1.016	1.03	0.896	0.978	0.935
CH60_MOUSE	(P63038) 60 kDa heat shock protein, mitochondrial	0.924	0.883	0.744	0.943	0.907
GNAO_MOUSE	(P18872) Guanine nucleotide-binding protein G(o) subunit alpha	1.05	0.931	0.995	1.005	0.941
DYN1_MOUSE	(P39053) Dynamin-1	1.073	0.912	1.098	1.073	1.12
DYN3_MOUSE	(Q8BZ98) Dynamin-3	1.123	0.946	1.126	1.098	1.149
DYN2_MOUSE	(P39054) Dynamin-2	1.125	0.934	1.12	1.087	1.157
ACTB_MOUSE	(P60710) Actin, cytoplasmic 1	0.947	0.971	0.914	0.954	1.079
ACTA_MOUSE	(P62737) Actin, aortic smooth muscle	0.939	0.961	0.911	0.919	1.069
ACON_MOUSE	(Q99KI0) Aconitate hydratase, mitochondrial	0.967	0.908	0.883	0.988	1.136
KCRU_MOUSE	(P30275) Creatine kinase U-type, mitochondrial	1.129	0.965	0.956	0.916	1.054
ENOA_MOUSE	(P17182) Alpha-enolase	0.97	0.837	0.964	1.049	1.004
ENOG_MOUSE	(P17183) Gamma-enolase	1.066	0.962	0.963	1.052	0.991
STX1B_MOUSE	(P61264) Syntaxin-1B	0.95	0.944	1.005	1.055	0.883
DYHC1_MOUSE	(Q9JHU4) Cytoplasmic dynein 1 heavy chain 1	1.013	0.98	1.066	1.098	0.954
CLH1_MOUSE	(Q68FD5) Clathrin heavy chain 1	1.118	0.999	0.997	1.101	1.206
G3P_MOUSE	(P16858) Glyceraldehyde-3-phosphate dehydrogenase	1.036	0.782	0.941	1.033	0.906
DNM1L_MOUSE	(Q8K1M6) Dynamin-1-like protein	1.092	0.991	1.085	0.982	0.992
STX1A_MOUSE	(O35526) Syntaxin-1A	0.986	0.817	0.91	0.891	0.967
ALDOC_MOUSE	(P05063) Fructose-bisphosphate aldolase C	0.975	0.792	0.853	0.946	0.942
ALDOA_MOUSE	(P05064) Fructose-bisphosphate aldolase A	0.951	0.828	0.789	0.9	0.887
TBB3_MOUSE	(Q9ERD7) Tubulin beta-3 chain	0.965	0.945	1.048	1.059	0.906
TBB5_MOUSE	(P99024) Tubulin beta-5 chain	0.967	1.038	1.038	1.086	0.869
TBB2B_MOUSE	(Q9CWF2) Tubulin beta-2B chain	0.98	1.039	1.042	1.082	0.873
TBB4A_MOUSE	(Q9D6F9) Tubulin beta-4A chain	1.076	0.889	0.981	1.035	0.932
TBB1_MOUSE	(A2AQ07) Tubulin beta-1 chain	0.985	0.905	1.621	1.031	0.975
MAP2_MOUSE	(P20357) Microtubule-associated protein 2	0.93	0.988	0.999	0.965	0.75
NSF_MOUSE	(P46460) Vesicle-fusing ATPase	0.974	0.958	0.983	1.116	0.895
HSP7C_MOUSE	(P63017) Heat shock cognate 71 kDa protein	1.006	1.016	0.982	1.147	0.979
GRP78_MOUSE	(P20029) 78 kDa glucose-regulated protein	0.784	1.124	0.903	0.871	0.713
HSP72_MOUSE	(P17156) Heat shock-related 70 kDa protein 2	1.088	1.088	1.094	1.078	1.067
HS71A_MOUSE	(Q61696) Heat shock 70 kDa protein 1A	1.026	1.096	1.129	1.003	1.063
LANC1_MOUSE	(O89112) LanC-like protein 1	0.77	1.099	0.915	0.847	0.749
VATB2_MOUSE	(P62814) V-type proton ATPase subunit B, brain isoform	1.063	0.883	0.992	0.989	1.146
MDHC_MOUSE	(P14152) Malate dehydrogenase, cytoplasmic	0.952	0.811	0.95	1.062	0.889
E41L3_MOUSE	(Q9WV92) Band 4.1-like protein 3	1.01	0.91	1.072	1.15	0.935
PRDX5_MOUSE	(P99029) Peroxiredoxin-5, mitochondrial	0.927	1.019	0.917	1.01	1.119
SNP25_MOUSE	(P60879) Synaptosomal-associated protein 25	0.996	1.021	1.1	1.112	1.065
PPIA_MOUSE	(P17742) Peptidyl-prolyl cis-trans isomerase A	1.018	1.057	1.023	1.09	1.065
PYC_MOUSE	(Q05920) Pyruvate carboxylase, mitochondrial	0.986	1.019	0.945	0.937	1.132
EAA2_MOUSE	(P43006) Excitatory amino acid transporter 2	0.941	0.803	1.255	1.944	0.677
DHE3_MOUSE	(P26443) Glutamate dehydrogenase 1, mitochondrial	1.01	0.893	0.95	1.041	1.185
DPYL2_MOUSE	(O08553) Dihydropyrimidinase-related protein 2	0.881	0.847	0.956	1.059	0.9
DPYL3_MOUSE	(Q62188) Dihydropyrimidinase-related protein 3	0.975	0.831	0.962	1.054	0.881
DPYL1_MOUSE	(P97427) Dihydropyrimidinase-related protein 1	1.066	0.928	1.017	1.273	1.017
DPYL4_MOUSE	(O35098) Dihydropyrimidinase-related protein 4	1.062	0.87	1.204	1.023	1.106
NDUS1_MOUSE	(Q91VD9) NADH-ubiquinone oxidoreductase 75 kDa subunit, mitochondrial	0.948	0.977	0.677	0.607	0.915
VATA_MOUSE	(P50516) V-type proton ATPase catalytic subunit A	1.015	0.89	0.996	1.151	1.151
OPA1_MOUSE	(P58281) Dynamin-like 120 kDa protein, mitochondrial	0.95	0.99	0.855	0.956	1.098
MYH10_MOUSE	(Q61879) Myosin-10	1.052	1.07	1.078	1.065	1.258
MYH9_MOUSE	(Q8VDD5) Myosin-9	0.979	1.12	0.984	0.976	1.153
MYH14_MOUSE	(Q6URW6) Myosin-14	1.085	0.859	0.944	0.968	1.121
VAMP2_MOUSE	(P63044) Vesicle-associated membrane protein 2	1.06	0.9	1.105	1.1	1.333
VAMP1_MOUSE	(Q62442) Vesicle-associated membrane protein 1	1.048	1.031	1.166	1.148	1.303
AP2A1_MOUSE	(P17426) AP-2 complex subunit alpha-1	1.007	0.992	1.079	1.109	1.103
AP2A2_MOUSE	(P17427) AP-2 complex subunit alpha-2	0.966	0.918	1.016	1.051	1.036
ODO2_MOUSE	(Q9D2G2) Dihydrolipoyllysine-residue succinyltransferase component of 2-oxoglutarate dehydrogenase complex, mitochondrial	0.998	1.003	0.907	0.893	1.049
RAB3A_MOUSE	(P63011) Ras-related protein Rab-3A	1.031	0.856	1.018	1.014	0.992
RAB6A_MOUSE	(P35279) Ras-related protein Rab-6A	0.962	0.914	1.046	0.933	1.006
RAB1A_MOUSE	(P62821) Ras-related protein Rab-1A	0.981	0.85	1.011	0.983	1.018
RAB10_MOUSE	(P61027) Ras-related protein Rab-10	1.011	0.896	1.07	0.964	1.04
RAB1B_MOUSE	(Q9D1G1) Ras-related protein Rab-1B	0.987	0.916	1.033	0.974	1.021
RAB3C_MOUSE	(P62823) Ras-related protein Rab-3C	1.006	0.876	1.067	1.027	1.011
RAB14_MOUSE	(Q91V41) Ras-related protein Rab-14	0.986	0.875	1.003	0.984	0.973
RAB6B_MOUSE	(P61294) Ras-related protein Rab-6B	0.993	0.92	1.064	0.949	1.041
RAB3B_MOUSE	(Q9CZT8) Ras-related protein Rab-3B	1	0.878	1.046	0.965	1.035
RAB4B_MOUSE	(Q91ZR1) Ras-related protein Rab-4B	0.993	0.895	1.046	0.962	1.034
RAB35_MOUSE	(Q6PHN9) Ras-related protein Rab-35	0.949	0.861	0.999	0.949	0.974
RB39B_MOUSE	(Q8BHC1) Ras-related protein Rab-39B	0.996	0.878	1.048	0.963	1.038
RAB15_MOUSE	(Q8K386) Ras-related protein Rab-15	0.996	0.883	1.048	0.961	1.038
RAB4A_MOUSE	(P56371) Ras-related protein Rab-4A	0.991	0.891	1.058	0.962	1.036
RAP1A_MOUSE	(P62835) Ras-related protein Rap-1A	1.017	1.049	1.148	0.655	0.966
GSTM1_MOUSE	(P10649) Glutathione S-transferase Mu 1	1.035	1.006	1.062	1.223	1.188
1433Z_MOUSE	(P63101) 14-3-3 protein zeta/delta	0.977	0.89	0.826	1.123	0.891
QCR1_MOUSE	(Q9CZ13) Cytochrome b-c1 complex subunit 1, mitochondrial	0.893	1.02	0.808	0.733	0.964
VPP1_MOUSE	(Q9Z1G4) V-type proton ATPase 116 kDa subunit a isoform 1	1.02	0.781	0.862	1.074	0.996
UBA1_MOUSE	(Q02053) Ubiquitin-like modifier-activating enzyme 1	1.018	0.821	0.992	1.062	0.974
EFTU_MOUSE	(Q8BFR5) Elongation factor Tu, mitochondrial	1.019	1.007	0.829	0.947	1.026
GABT_MOUSE	(P61922) 4-aminobutyrate aminotransferase, mitochondrial	1.008	0.804	0.863	0.958	1.006
DHSA_MOUSE	(Q8K2B3) Succinate dehydrogenase [ubiquinone] flavoprotein subunit, mitochondrial	1.07	1.064	1.013	1.015	1.158
AT2B2_MOUSE	(Q9R0K7) Plasma membrane calcium-transporting ATPase 2	1.04	0.903	0.953	0.981	0.865
MDHM_MOUSE	(P08249) Malate dehydrogenase, mitochondrial	0.943	0.977	0.825	0.896	1.103
ODPB_MOUSE	(Q9D051) Pyruvate dehydrogenase E1 component subunit beta, mitochondrial	0.982	1.007	0.736	1.019	1.017
GLNA_MOUSE	(P15105) Glutamine synthetase	0.994	1.036	1.139	1.165	0.922
NDUB7_MOUSE	(Q9CR61) NADH dehydrogenase [ubiquinone] 1 beta subcomplex subunit 7	1.021	1.09	0.651	0.752	0.849
HS90A_MOUSE	(P07901) Heat shock protein HSP 90-alpha	0.935	0.944	0.94	0.996	0.89
HS90B_MOUSE	(P11499) Heat shock protein HSP 90-beta	0.923	0.987	0.873	0.98	0.861
ENPL_MOUSE	(P08113) Endoplasmin	0.746	1.184	0.772	0.869	0.619
TRAP1_MOUSE	(Q9CQN1) Heat shock protein 75 kDa, mitochondrial	0.935	0.857	0.926	0.91	1
GRP75_MOUSE	(P38647) Stress-70 protein, mitochondrial	0.954	0.932	0.799	0.91	1.037
PYGB_MOUSE	(Q8CI94) Glycogen phosphorylase, brain form	1.046	0.861	0.967	1.105	1.118
SYNJ1_MOUSE	(Q8CHC4) Synaptojanin-1	1.003	0.856	0.912	1.023	0.92
SAHH2_MOUSE	(Q80SW1) Putative adenosylhomocysteinase 2	0.965	0.888	0.82	0.999	0.805
1433E_MOUSE	(P62259) 14-3-3 protein epsilon	1.039	0.934	1.125	1.112	1.013
PLCB1_MOUSE	(Q9Z1B3) 1-phosphatidylinositol 4,5-bisphosphate phosphodiesterase beta-1	1.026	0.891	1.032	0.99	0.937
NDUA9_MOUSE	(Q9DC69) NADH dehydrogenase [ubiquinone] 1 alpha subcomplex subunit 9, mitochondrial	0.915	1.027	0.567	0.631	0.794
SYT1_MOUSE	(P46096) Synaptotagmin-1	1.039	0.801	1.016	1.082	1.071
SYT2_MOUSE	(P46097) Synaptotagmin-2	0.987	0.683	0.981	1.043	0.988
PHB_MOUSE	(P67778) Prohibitin	0.918	0.934	0.686	0.72	1.074
SV2B_MOUSE	(Q8BG39) Synaptic vesicle glycoprotein 2B	1.111	1.109	1.122	1.03	1.274
VATE1_MOUSE	(P50518) V-type proton ATPase subunit E 1	1.053	0.852	0.929	1.073	1.023
CMC1_MOUSE	(Q8BH59) Calcium-binding mitochondrial carrier protein Aralar1	0.863	1.076	0.78	0.692	1.059
GBB1_MOUSE	(P62874) Guanine nucleotide-binding protein G(I)/G(S)/G(T) subunit beta-1	0.971	0.945	0.775	1.186	0.702
GBB2_MOUSE	(P62880) Guanine nucleotide-binding protein G(I)/G(S)/G(T) subunit beta-2	0.975	0.985	0.878	1.111	0.795
LASP1_MOUSE	(Q61792) LIM and SH3 domain protein 1	0.955	0.905	0.937	0.95	0.954
KCC2A_MOUSE	(P11798) Calcium/calmodulin-dependent protein kinase type II subunit alpha	1.036	1.007	0.967	1.112	3.089
KCC2B_MOUSE	(P28652) Calcium/calmodulin-dependent protein kinase type II subunit beta	1.032	0.893	0.947	1.132	2.35
KCC2D_MOUSE	(Q6PHZ2) Calcium/calmodulin-dependent protein kinase type II subunit delta	0.997	0.923	0.943	1.147	2.207
KCC2G_MOUSE	(Q923T9) Calcium/calmodulin-dependent protein kinase type II subunit gamma	0.965	0.922	0.975	1.17	2.419
PACN1_MOUSE	(Q61644) Protein kinase C and casein kinase substrate in neurons protein 1	1.011	0.891	0.947	1.007	0.962
PACN2_MOUSE	(Q9WVE8) Protein kinase C and casein kinase substrate in neurons protein 2	0.985	0.893	0.944	1.015	0.946
SSDH_MOUSE	(Q8BWF0) Succinate-semialdehyde dehydrogenase, mitochondrial	1.12	0.999	0.857	1.13	1.016
HXK1_MOUSE	(P17710) Hexokinase-1	0.996	0.885	0.663	0.868	1.55
AP2B1_MOUSE	(Q9DBG3) AP-2 complex subunit beta	1.103	0.982	1.033	1.212	1.067
AP1B1_MOUSE	(O35643) AP-1 complex subunit beta-1	1.076	1.016	1.099	1.259	1.092
NDUS3_MOUSE	(Q9DCT2) NADH dehydrogenase [ubiquinone] iron-sulfur protein 3, mitochondrial	0.998	1.016	0.657	0.65	0.917
SUCB1_MOUSE	(Q9Z2I9) Succinyl-CoA ligase [ADP-forming] subunit beta, mitochondrial	0.938	0.991	0.753	1.026	0.932
GPDM_MOUSE	(Q64521) Glycerol-3-phosphate dehydrogenase, mitochondrial	1.052	0.996	0.955	1.006	1.187
MAP1B_MOUSE	(P14873) Microtubule-associated protein 1B	0.966	1.025	1.077	1.112	0.834
VATF_MOUSE	(Q9D1K2) V-type proton ATPase subunit F	1.092	0.967	0.998	0.995	1.091
MAP1A_MOUSE	(Q9QYR6) Microtubule-associated protein 1A	0.904	1.099	1.04	1.083	0.747
PRDX6_MOUSE	(O08709) Peroxiredoxin-6	0.953	1.071	0.874	0.899	1.043
PCCA_MOUSE	(Q91ZA3) Propionyl-CoA carboxylase alpha chain, mitochondrial	0.992	0.988	0.968	0.956	1.137
KAD1_MOUSE	(Q9R0Y5) Adenylate kinase isoenzyme 1	0.954	0.906	0.927	1.003	0.958
TCPB_MOUSE	(P80314) T-complex protein 1 subunit beta	0.924	0.965	0.946	0.98	0.902
UBP5_MOUSE	(P56399) Ubiquitin carboxyl-terminal hydrolase 5	1.045	0.92	1.09	1.005	1.048
PGK1_MOUSE	(P09411) Phosphoglycerate kinase 1	0.994	0.958	0.986	0.959	1.226
SV2A_MOUSE	(Q9JIS5) Synaptic vesicle glycoprotein 2A	1.099	0.885	1.043	1.05	1.074
ANK2_MOUSE	(Q8C8R3) Ankyrin-2	0.997	1.051	0.96	1.064	0.906
NFASC_MOUSE	(Q810U3) Neurofascin	1.013	0.941	1.07	1.055	0.882
HSP74_MOUSE	(Q61316) Heat shock 70 kDa protein 4	1.04	0.903	1	1.044	1.032
PROF1_MOUSE	(P62962) Profilin-1	0.963	0.957	1.093	0.907	1.058
BASP1_MOUSE	(Q91XV3) Brain acid soluble protein 1	0.886	1.185	0.85	1.044	0.826
PCSK1_MOUSE	(Q9QXV0) ProSAAS	0.996	0.993	1.307	1.065	0.785
1433G_MOUSE	(P61982) 14-3-3 protein gamma	0.98	0.959	0.912	1.075	0.921
1433B_MOUSE	(Q9CQV8) 14-3-3 protein beta/alpha	0.941	1.008	0.852	1.08	0.861
SODC_MOUSE	(P08228) Superoxide dismutase [Cu-Zn]	0.922	0.901	1.061	0.936	0.999
UCRI_MOUSE	(Q9CR68) Cytochrome b-c1 complex subunit Rieske, mitochondrial	0.925	0.982	0.702	0.788	0.913
QCR6_MOUSE	(P99028) Cytochrome b-c1 complex subunit 6, mitochondrial	0.965	1.167	0.81	0.93	0.92
GSTP1_MOUSE	(P19157) Glutathione S-transferase P 1	0.962	1.054	1.125	0.993	1.011
AP180_MOUSE	(Q61548) Clathrin coat assembly protein AP180	0.997	0.992	0.717	1.034	0.909
AT2A2_MOUSE	(O55143) Sarcoplasmic/endoplasmic reticulum calcium ATPase 2	0.897	0.969	0.919	0.911	0.855
ATPG_MOUSE	(Q91VR2) ATP synthase subunit gamma, mitochondrial	0.95	1.058	0.79	0.956	1.021
SYN2_MOUSE	(Q64332) Synapsin-2	1.086	0.964	1.087	1.061	1.284
SYN1_MOUSE	(O88935) Synapsin-1	1.065	0.976	1.13	1.062	1.315
THIL_MOUSE	(Q8QZT1) Acetyl-CoA acetyltransferase, mitochondrial	0.853	0.802	0.728	0.93	0.892
MOES_MOUSE	(P26041) Moesin	0.813	1.118	1.08	0.939	0.911
EZRI_MOUSE	(P26040) Ezrin	0.966	0.897	0.892	0.979	1.098
RADI_MOUSE	(P26043) Radixin	0.883	1.051	1.091	0.972	0.922
ANXA5_MOUSE	(P48036) Annexin A5	0.922	1.08	0.972	0.968	0.879
ATPD_MOUSE	(Q9D3D9) ATP synthase subunit delta, mitochondrial	1.008	1.097	0.916	0.961	1.158
SFXN3_MOUSE	(Q91V61) Sideroflexin-3	0.916	1.114	0.861	0.869	1.111
SEPT5_MOUSE	(Q9Z2Q6) Septin-5	1.183	0.894	1.216	1.619	1.301
SEPT4_MOUSE	(P28661) Septin-4	1.067	0.853	1.23	1.513	1.199
SH3G2_MOUSE	(Q62420) Endophilin-A1	1.035	0.84	0.98	1.128	1.075
SH3G1_MOUSE	(Q62419) Endophilin-A2	1.049	0.913	1.179	1.057	1.294
IGSF8_MOUSE	(Q8R366) Immunoglobulin superfamily member 8	1.098	1.017	1.188	1.034	0.977
CALR_MOUSE	(P14211) Calreticulin	0.719	1.085	0.8	0.872	0.556
HYOU1_MOUSE	(Q9JKR6) Hypoxia up-regulated protein 1	0.752	1.133	0.905	0.797	0.647
PALM_MOUSE	(Q9Z0P4) Paralemmin-1	0.953	0.993	0.988	0.964	0.863
ARPC2_MOUSE	(Q9CVB6) Actin-related protein 2/3 complex subunit 2	1.105	0.951	0.979	1.033	0.895
RGS7_MOUSE	(O54829) Regulator of G-protein signaling 7	0.995	0.91	1.016	1.019	0.967
RGS6_MOUSE	(Q9Z2H2) Regulator of G-protein signaling 6	1.001	0.91	1.025	1.014	0.964
DCTN1_MOUSE	(O08788) Dynactin subunit 1	0.977	0.946	1.106	1.062	1.001
TIM10_MOUSE	(P62073) Mitochondrial import inner membrane translocase subunit Tim10	1.029	1.271	0.905	0.997	1.003
CANB1_MOUSE	(Q63810) Calcineurin subunit B type 1	0.984	0.862	0.876	0.997	1.511
GUAD_MOUSE	(Q9R111) Guanine deaminase	1.011	1.063	1.054	1.033	1.131
HS74L_MOUSE	(P48722) Heat shock 70 kDa protein 4L	1.018	1.015	1.218	1.037	1.023
PCCB_MOUSE	(Q99MN9) Propionyl-CoA carboxylase beta chain, mitochondrial	1.048	0.913	0.878	0.898	1.069
RCN2_MOUSE	(Q8BP92) Reticulocalbin-2	0.894	1.248	0.979	0.913	0.806
SNAB_MOUSE	(P28663) Beta-soluble NSF attachment protein	1.069	1.153	1.021	1.108	0.99
TENR_MOUSE	(Q8BYI9) Tenascin-R	1.096	1.048	1.124	1.262	0.925
LYAG_MOUSE	(P70699) Lysosomal alpha-glucosidase	0.84	1.017	1.289	0.891	0.966
RAP2A_MOUSE	(Q80ZJ1) Ras-related protein Rap-2a	1.07	1.092	1.119	1.001	1.034
RAP2B_MOUSE	(P61226) Ras-related protein Rap-2b	1.064	1.183	1.119	1.092	1.027
RAP2C_MOUSE	(Q8BU31) Ras-related protein Rap-2c	1.095	1.091	1.103	1.044	1.036
KPCG_MOUSE	(P63318) Protein kinase C gamma type	1.139	1.083	1.139	1.1	1.391
VDAC1_MOUSE	(Q60932) Voltage-dependent anion-selective channel protein 1	0.964	1.178	0.525	0.72	1.252
ACLY_MOUSE	(Q91V92) ATP-citrate synthase	0.985	0.943	0.911	1.039	0.963
TPPP_MOUSE	(Q7TQD2) Tubulin polymerization-promoting protein	1.009	0.946	0.975	0.982	0.873
TLN2_MOUSE	(Q71LX4) Talin-2	1.044	0.963	1.093	1.055	1.034
TLN1_MOUSE	(P26039) Talin-1	0.893	1.143	1.123	1.001	1.03
C1QBP_MOUSE	(O35658) Complement component 1 Q subcomponent-binding protein, mitochondrial	1.061	0.938	0.928	1	1.047
CX6B1_MOUSE	(P56391) Cytochrome c oxidase subunit 6B1	1.045	1.405	0.629	0.47	0.786
PEBP1_MOUSE	(P70296) Phosphatidylethanolamine-binding protein 1	0.987	0.93	0.779	0.81	0.852
KAP2_MOUSE	(P12367) cAMP-dependent protein kinase type II-alpha regulatory subunit	0.972	0.856	1.656	1.011	1.308
SCOT1_MOUSE	(Q9D0K2) Succinyl-CoA:3-ketoacid coenzyme A transferase 1, mitochondrial	0.955	0.834	0.774	0.972	1.034
PDIA1_MOUSE	(P09103) Protein disulfide-isomerase	0.775	1.001	0.763	0.835	0.617
ODP2_MOUSE	(Q8BMF4) Dihydrolipoyllysine-residue acetyltransferase component of pyruvate dehydrogenase complex, mitochondrial	0.914	0.879	0.701	0.908	0.993
THIKA_MOUSE	(Q921H8) 3-ketoacyl-CoA thiolase A, peroxisomal	1.088	1.212	1.082	0.891	1.09
ASGL1_MOUSE	(Q8C0M9) Isoaspartyl peptidase/L-asparaginase	1.118	1.397	0.959	1.118	1.003
AKAP5_MOUSE	(D3YVF0) A-kinase anchor protein 5	0.975	0.992	0.876	0.953	0.921
AL1L1_MOUSE	(Q8R0Y6) Cytosolic 10-formyltetrahydrofolate dehydrogenase	1.009	0.897	1.023	0.958	1.102
RTN4_MOUSE	(Q99P72) Reticulon-4	1.13	1.035	1.05	1.038	0.867
HBB1_MOUSE	(P02088) Hemoglobin subunit beta-1	0.499	1.564	0.671	0.765	0.427
ODO1_MOUSE	(Q60597) 2-oxoglutarate dehydrogenase, mitochondrial	1.004	1.007	0.901	0.93	1.09
CISY_MOUSE	(Q9CZU6) Citrate synthase, mitochondrial	1.043	1.105	0.97	1.002	1.246
PDIA6_MOUSE	(Q922R8) Protein disulfide-isomerase A6	0.739	1.269	0.905	0.791	0.624
TERA_MOUSE	(Q01853) Transitional endoplasmic reticulum ATPase	1.139	0.878	1.133	1.121	1.149
AP3B2_MOUSE	(Q9JME5) AP-3 complex subunit beta-2	1.068	1.018	1.127	1.083	1.053
RHOA_MOUSE	(Q9QUI0) Transforming protein RhoA	0.842	0.979	1.149	0.931	0.904
RHOB_MOUSE	(P62746) Rho-related GTP-binding protein RhoB	0.852	1.015	1.129	0.926	0.909
RHOC_MOUSE	(Q62159) Rho-related GTP-binding protein RhoC	0.841	0.974	1.159	0.929	0.912
CN37_MOUSE	(P16330) 2',3'-cyclic-nucleotide 3'-phosphodiesterase	0.935	0.846	0.831	1.022	0.654
SERA_MOUSE	(Q61753) D-3-phosphoglycerate dehydrogenase	0.964	0.916	0.908	0.936	0.986
LETM1_MOUSE	(Q9Z2I0) LETM1 and EF-hand domain-containing protein 1, mitochondrial	1.021	0.967	0.927	0.965	1.086
AMPH_MOUSE	(Q7TQF7) Amphiphysin	0.994	0.853	0.956	1.045	1.001
BIN1_MOUSE	(O08539) Myc box-dependent-interacting protein 1	0.845	1.248	0.858	0.901	0.895
GDIA_MOUSE	(P50396) Rab GDP dissociation inhibitor alpha	1.07	1.111	1.068	1.108	1.041
GDIB_MOUSE	(Q61598) Rab GDP dissociation inhibitor beta	0.943	0.986	0.929	1.038	0.978
PYGM_MOUSE	(Q9WUB3) Glycogen phosphorylase, muscle form	1.004	1.007	1.078	1.162	0.931
PDIA3_MOUSE	(P27773) Protein disulfide-isomerase A3	0.754	1.176	0.822	0.854	0.617
CALX_MOUSE	(P35564) Calnexin	0.832	1.125	0.946	0.91	0.724
RD23B_MOUSE	(P54728) UV excision repair protein RAD23 homolog B	1.067	1.045	1.085	1.119	1.059
4F2_MOUSE	(P10852) 4F2 cell-surface antigen heavy chain	0.968	0.898	1.164	1.254	0.854
HS105_MOUSE	(Q61699) Heat shock protein 105 kDa	0.997	0.927	0.959	0.936	0.89
DCTN2_MOUSE	(Q99KJ8) Dynactin subunit 2	1.01	0.933	1.022	1.168	0.988
RPN1_MOUSE	(Q91YQ5) Dolichyl-diphosphooligosaccharide--protein glycosyltransferase subunit 1	0.775	1.379	0.901	0.91	0.686
CNTN1_MOUSE	(P12960) Contactin-1	1.027	0.977	0.954	1.039	0.834
ROCK2_MOUSE	(P70336) Rho-associated protein kinase 2	1.049	0.895	0.989	1.123	1
ROCK1_MOUSE	(P70335) Rho-associated protein kinase 1	0.99	0.825	0.855	1.033	0.972
UBE2N_MOUSE	(P61089) Ubiquitin-conjugating enzyme E2 N	1.125	1.005	1.051	1.025	1.165
IMMT_MOUSE	(Q8CAQ8) Mitochondrial inner membrane protein	1.004	1.052	0.478	0.502	1.325
CADM2_MOUSE	(Q8BLQ9) Cell adhesion molecule 2	1.068	0.844	0.915	0.946	0.864
VATH_MOUSE	(Q8BVE3) V-type proton ATPase subunit H	1.087	3.076	1.04	1.056	1.087
ARP2_MOUSE	(P61161) Actin-related protein 2	1.071	1.101	1.08	1.004	1.071
CAMKV_MOUSE	(Q3UHL1) CaM kinase-like vesicle-associated protein	1.066	0.961	1.094	1.044	1.205
GDAP1_MOUSE	(O88741) Ganglioside-induced differentiation-associated protein 1	0.959	1.001	0.807	0.806	1.013
NDUV2_MOUSE	(Q9D6J6) NADH dehydrogenase [ubiquinone] flavoprotein 2, mitochondrial	0.917	0.884	0.606	0.584	0.794
FUMH_MOUSE	(P97807) Fumarate hydratase, mitochondrial	0.949	0.849	0.848	0.886	0.913
LDHB_MOUSE	(P16125) L-lactate dehydrogenase B chain	0.973	1.137	0.861	1.115	0.909
LDHA_MOUSE	(P06151) L-lactate dehydrogenase A chain	0.946	0.821	0.958	0.936	1.077
A4_MOUSE	(P12023) Amyloid beta A4 protein	0.892	1.032	0.948	0.966	0.815
SYAC_MOUSE	(Q8BGQ7) Alanine--tRNA ligase, cytoplasmic	1.051	1.065	1.233	1.109	1.131
ACADV_MOUSE	(P50544) Very long-chain specific acyl-CoA dehydrogenase, mitochondrial	0.853	0.699	0.868	0.903	1.062
SIR2_MOUSE	(Q8VDQ8) NAD-dependent protein deacetylase sirtuin-2	0.958	0.957	0.998	1.069	0.821
CAND1_MOUSE	(Q6ZQ38) Cullin-associated NEDD8-dissociated protein 1	0.997	0.971	1.11	0.996	0.989
NDUA4_MOUSE	(Q62425) NADH dehydrogenase [ubiquinone] 1 alpha subcomplex subunit 4	0.924	1.141	0.439	0.528	0.725
SOGA3_MOUSE	(Q6NZL0) Protein SOGA3	1.069	0.996	1.171	1.111	1.024
NCAM1_MOUSE	(P13595) Neural cell adhesion molecule 1	0.961	0.928	1.058	0.975	0.838
ATP5J_MOUSE	(P97450) ATP synthase-coupling factor 6, mitochondrial	0.914	1.259	0.674	0.94	0.936
MBP_MOUSE	(P04370) Myelin basic protein	1.115	1.041	0.907	0.937	0.946
ADT1_MOUSE	(P48962) ADP/ATP translocase 1	0.832	1.125	0.617	0.877	0.85
GLSK_MOUSE	(D3Z7P3) Glutaminase kidney isoform, mitochondrial	0.926	0.899	0.737	0.816	1.035
WASF1_MOUSE	(Q8R5H6) Wiskott-Aldrich syndrome protein family member 1	1.009	1.008	0.986	1.043	0.969
MAON_MOUSE	(Q8BMF3) NADP-dependent malic enzyme, mitochondrial	0.941	0.984	0.983	0.915	1.357
MAOM_MOUSE	(Q99KE1) NAD-dependent malic enzyme, mitochondrial	0.914	0.962	0.989	0.911	1.326
EHD1_MOUSE	(Q9WVK4) EH domain-containing protein 1	1.125	1.173	1.153	1.112	1.074
EHD3_MOUSE	(Q9QXY6) EH domain-containing protein 3	1.038	1.038	1.046	1.083	0.993
PGES2_MOUSE	(Q8BWM0) Prostaglandin E synthase 2	1.163	1.065	0.881	0.902	1.128
CDS2_MOUSE	(Q99L43) Phosphatidate cytidylyltransferase 2	0.856	1.149	1.111	0.965	0.802
NDUS2_MOUSE	(Q91WD5) NADH dehydrogenase [ubiquinone] iron-sulfur protein 2, mitochondrial	1.324	1.058	0.699	0.604	0.873
SEPT7_MOUSE	(O55131) Septin-7	1.184	0.777	1.27	1.462	1.308
EF2_MOUSE	(P58252) Elongation factor 2	0.914	0.865	0.9	0.976	0.767
TIM44_MOUSE	(O35857) Mitochondrial import inner membrane translocase subunit TIM44	1.071	1.101	0.891	0.86	0.97
2AAA_MOUSE	(Q76MZ3) Serine/threonine-protein phosphatase 2A 65 kDa regulatory subunit A alpha isoform	0.986	0.959	0.973	1.071	0.93
CAP2_MOUSE	(Q9CYT6) Adenylyl cyclase-associated protein 2	0.986	1.072	0.943	0.923	1.035
DMXL2_MOUSE	(Q8BPN8) DmX-like protein 2	1.045	0.892	0.984	1.029	1.1
AAK1_MOUSE	(Q3UHJ0) AP2-associated protein kinase 1	0.994	0.781	1.164	0.973	1.036
NDUB6_MOUSE	(Q3UIU2) NADH dehydrogenase [ubiquinone] 1 beta subcomplex subunit 6	0.923	1.278	0.661	0.617	0.917
PCP4_MOUSE	(P63054) Purkinje cell protein 4	1.07	0.925	0.893	0.96	0.894
AP2M1_MOUSE	(P84091) AP-2 complex subunit mu	0.983	0.669	0.826	1.008	0.963
HS12A_MOUSE	(Q8K0U4) Heat shock 70 kDa protein 12A	1.073	0.93	0.988	1.14	0.987
DEST_MOUSE	(Q9R0P5) Destrin	1.016	0.901	1.255	1.075	0.996
PCKGM_MOUSE	(Q8BH04) Phosphoenolpyruvate carboxykinase [GTP], mitochondrial	1.003	0.972	1.052	0.944	1.166
SPRE_MOUSE	(Q64105) Sepiapterin reductase	1.344	1.346	1.6	1.052	1.233
MPP2_MOUSE	(Q9WV34) MAGUK p55 subfamily member 2	1.007	0.897	1.042	0.942	1.028
NEUM_MOUSE	(P06837) Neuromodulin	0.85	0.86	0.783	0.921	0.645
GRIN1_MOUSE	(Q3UNH4) G protein-regulated inducer of neurite outgrowth 1	0.922	1.037	0.888	1.031	0.828
NDUBA_MOUSE	(Q9DCS9) NADH dehydrogenase [ubiquinone] 1 beta subcomplex subunit 10	1.034	1.096	0.775	0.667	0.96
TCPZ_MOUSE	(P80317) T-complex protein 1 subunit zeta	0.976	1.098	1.011	0.986	0.915
TPM3_MOUSE	(P21107) Tropomyosin alpha-3 chain	0.848	1.076	0.96	0.909	0.908
TPM4_MOUSE	(Q6IRU2) Tropomyosin alpha-4 chain	0.766	1.129	0.896	0.835	0.81
TPM1_MOUSE	(P58771) Tropomyosin alpha-1 chain	0.835	1.113	0.977	0.888	0.866
SCRN1_MOUSE	(Q9CZC8) Secernin-1	1.042	1.003	1.166	0.989	0.984
TCPQ_MOUSE	(P42932) T-complex protein 1 subunit theta	0.941	0.931	0.876	0.958	0.852
ACSL6_MOUSE	(Q91WC3) Long-chain-fatty-acid--CoA ligase 6	0.911	0.844	0.834	0.909	0.979
ECHA_MOUSE	(Q8BMS1) Trifunctional enzyme subunit alpha, mitochondrial	1.01	0.658	0.983	1.247	1.135
LIPA3_MOUSE	(P60469) Liprin-alpha-3	1.085	0.871	1.076	0.969	1.171
ANXA6_MOUSE	(P14824) Annexin A6	0.933	0.98	0.871	0.94	0.812
PARK7_MOUSE	(Q99LX0) Protein DJ-1	0.969	0.943	0.822	1.17	0.977
PLPP_MOUSE	(P60487) Pyridoxal phosphate phosphatase	1	0.913	1.148	1.111	1.277
PP2BB_MOUSE	(P48453) Serine/threonine-protein phosphatase 2B catalytic subunit beta isoform	0.953	0.826	0.893	1.093	0.938
PP2BA_MOUSE	(P63328) Serine/threonine-protein phosphatase 2B catalytic subunit alpha isoform	0.968	0.809	0.848	1.085	0.915
TM1L2_MOUSE	(Q5SRX1) TOM1-like protein 2	1.034	1.141	1	0.98	1.036
RLA2_MOUSE	(P99027) 60S acidic ribosomal protein P2	0.725	1.165	0.821	0.904	0.612
SKP1_MOUSE	(Q9WTX5) S-phase kinase-associated protein 1	1.059	1.035	1.13	0.998	1.072
RP3A_MOUSE	(P47708) Rabphilin-3A	0.988	0.817	0.923	1.007	0.993
FA49B_MOUSE	(Q921M7) Protein FAM49B	0.888	0.901	0.998	0.931	0.968
MAP6_MOUSE	(Q7TSJ2) Microtubule-associated protein 6	0.865	1.029	1.043	1.031	0.841
ATAD3_MOUSE	(Q925I1) ATPase family AAA domain-containing protein 3	0.963	1.012	0.862	0.965	1.082
RPGF2_MOUSE	(Q8CHG7) Rap guanine nucleotide exchange factor 2	1.002	0.953	1.063	0.988	1.115
KIF5C_MOUSE	(P28738) Kinesin heavy chain isoform 5C	0.962	0.886	1.027	0.982	1.002
KINH_MOUSE	(Q61768) Kinesin-1 heavy chain	0.975	0.883	1.094	0.974	0.977
DC1I1_MOUSE	(O88485) Cytoplasmic dynein 1 intermediate chain 1	1.051	0.968	1.224	1.055	1.087
DLDH_MOUSE	(O08749) Dihydrolipoyl dehydrogenase, mitochondrial	0.982	0.823	0.727	0.875	0.885
NIPS1_MOUSE	(O55125) Protein NipSnap homolog 1	0.996	1.048	0.865	0.921	1.231
PDIA4_MOUSE	(P08003) Protein disulfide-isomerase A4	0.778	1.079	0.814	0.792	0.703
VISL1_MOUSE	(P62761) Visinin-like protein 1	1.05	0.857	0.856	0.98	0.838
NTRI_MOUSE	(Q99PJ0) Neurotrimin	0.981	0.893	0.893	0.91	0.972
ADA22_MOUSE	(Q9R1V6) Disintegrin and metalloproteinase domain-containing protein 22	1.053	1.011	1.037	1.126	0.907
RAB2A_MOUSE	(P53994) Ras-related protein Rab-2A	0.954	0.99	0.986	0.966	0.96
VATG2_MOUSE	(Q9WTT4) V-type proton ATPase subunit G 2	0.997	0.912	1.039	1.111	1.079
STIP1_MOUSE	(Q60864) Stress-induced-phosphoprotein 1	0.976	0.928	0.976	1.089	0.875
RAB7A_MOUSE	(P51150) Ras-related protein Rab-7a	0.874	0.888	0.995	0.966	0.847
KI21A_MOUSE	(Q9QXL2) Kinesin-like protein KIF21A	0.986	0.876	1.089	1.036	1.1
RASH_MOUSE	(Q61411) GTPase HRas	0.987	0.853	1.005	0.898	0.967
NOL3_MOUSE	(Q9D1X0) Nucleolar protein 3	1.3	1.197	1.301	0.959	1.242
DPYL5_MOUSE	(Q9EQF6) Dihydropyrimidinase-related protein 5	0.908	0.714	0.972	1.106	0.877
ATPO_MOUSE	(Q9DB20) ATP synthase subunit O, mitochondrial	1.038	1.003	0.975	0.949	1.155
RM12_MOUSE	(Q9DB15) 39S ribosomal protein L12, mitochondrial	0.959	0.917	0.752	0.933	0.963
GNAI2_MOUSE	(P08752) Guanine nucleotide-binding protein G(i) subunit alpha-2	0.988	0.991	1.041	0.982	0.82
EP15R_MOUSE	(Q60902) Epidermal growth factor receptor substrate 15-like 1	0.972	1.075	1.156	1.127	1.046
CLAP2_MOUSE	(Q8BRT1) CLIP-associating protein 2	1.012	0.853	1.161	1.186	1.022
PHB2_MOUSE	(O35129) Prohibitin-2	0.942	1.078	0.914	0.79	1.153
1433F_MOUSE	(P68510) 14-3-3 protein eta	0.985	0.805	0.89	0.982	0.909
RAB5C_MOUSE	(P35278) Ras-related protein Rab-5C	1.013	0.997	0.917	1.042	0.965
RAB5B_MOUSE	(P61021) Ras-related protein Rab-5B	1.152	0.987	1.008	1.174	1.064
RAB5A_MOUSE	(Q9CQD1) Ras-related protein Rab-5A	0.957	0.922	1.055	0.961	0.953
TKT_MOUSE	(P40142) Transketolase	0.938	0.842	0.816	1.008	0.802
TTYH1_MOUSE	(Q9D3A9) Protein tweety homolog 1	0.921	0.852	1.183	1.215	0.826
ODPX_MOUSE	(Q8BKZ9) Pyruvate dehydrogenase protein X component, mitochondrial	1.033	0.963	1.053	0.996	1.317
NCKP1_MOUSE	(P28660) Nck-associated protein 1	0.957	1.125	1.001	1.041	0.92
HPCA_MOUSE	(P84075) Neuron-specific calcium-binding protein hippocalcin	1.076	1.108	0.973	1.137	0.974
K1045_MOUSE	(Q80TL4) Protein KIAA1045	0.988	0.961	1.035	1.057	1.038
GD1L1_MOUSE	(Q8VE33) Ganglioside-induced differentiation-associated protein 1-like 1	1.106	1.18	1.436	0.846	1.731
SYPH_MOUSE	(Q62277) Synaptophysin	0.962	0.709	0.915	1.092	0.94
FAS_MOUSE	(P19096) Fatty acid synthase	0.999	1.003	0.988	0.948	0.925
SYNC_MOUSE	(Q8BP47) Asparagine--tRNA ligase, cytoplasmic	1.062	1.171	1.052	0.955	1.051
PFD1_MOUSE	(Q9CWM4) Prefoldin subunit 1	0.986	1.072	0.991	0.928	1.055
NCDN_MOUSE	(Q9Z0E0) Neurochondrin	0.951	0.934	1.023	1.007	0.921
F10A1_MOUSE	(Q99L47) Hsc70-interacting protein	0.869	0.855	0.817	0.873	0.788
CYB5B_MOUSE	(Q9CQX2) Cytochrome b5 type B	1.321	1.28	0.95	0.908	1.243
HEMH_MOUSE	(P22315) Ferrochelatase, mitochondrial	0.884	0.853	1.071	0.825	1.255
MTX1_MOUSE	(P47802) Metaxin-1	0.881	1.039	0.8	0.712	1.217
OAT_MOUSE	(P29758) Ornithine aminotransferase, mitochondrial	0.981	0.842	0.931	0.992	1.21
ACBG1_MOUSE	(Q99PU5) Long-chain-fatty-acid--CoA ligase ACSBG1	0.992	0.9	0.974	1.057	0.948
PLEC_MOUSE	(Q9QXS1) Plectin	1.031	0.989	1.086	1.124	1.126
PRDX3_MOUSE	(P20108) Thioredoxin-dependent peroxide reductase, mitochondrial	1.037	1.21	0.968	0.951	1.136
DNJA1_MOUSE	(P63037) DnaJ homolog subfamily A member 1	1.03	0.974	0.755	0.959	0.83
KAP3_MOUSE	(P31324) cAMP-dependent protein kinase type II-beta regulatory subunit	1.049	0.799	0.887	0.927	0.882
CLUS_MOUSE	(Q06890) Clusterin	0.828	1.144	1.02	1.004	0.851
CTNA2_MOUSE	(Q61301) Catenin alpha-2	1.095	0.94	1.086	1.09	1.285
NAC1_MOUSE	(P70414) Sodium/calcium exchanger 1	1.081	0.976	0.94	1.037	0.883
SEPT9_MOUSE	(Q80UG5) Septin-9	1.115	0.829	1.122	1.286	1.124
ETFD_MOUSE	(Q921G7) Electron transfer flavoprotein-ubiquinone oxidoreductase, mitochondrial	1.004	1.047	0.97	0.918	1.18
KIF1A_MOUSE	(P33173) Kinesin-like protein KIF1A	0.957	0.959	1.144	1.045	1.184
CNDP2_MOUSE	(Q9D1A2) Cytosolic non-specific dipeptidase	0.994	1.012	1.054	0.948	1.037
GBG2_MOUSE	(P63213) Guanine nucleotide-binding protein G(I)/G(S)/G(O) subunit gamma-2	1.182	1.159	1.011	0.963	1.108
GNAZ_MOUSE	(O70443) Guanine nucleotide-binding protein G(z) subunit alpha	0.999	1.081	0.966	1.079	0.993
SCG2_MOUSE	(Q03517) Secretogranin-2	1.031	0.999	1.289	1.104	0.937
PDE2A_MOUSE	(Q922S4) cGMP-dependent 3',5'-cyclic phosphodiesterase	0.963	0.968	0.895	0.98	0.845
MAOX_MOUSE	(P06801) NADP-dependent malic enzyme	0.929	0.908	0.966	0.961	1.021
IDHG1_MOUSE	(P70404) Isocitrate dehydrogenase [NAD] subunit gamma 1, mitochondrial	1.142	1.236	0.965	1.064	1.189
K6PP_MOUSE	(Q9WUA3) 6-phosphofructokinase type C	1.109	0.859	1.05	1.099	1.038
ANXA7_MOUSE	(Q07076) Annexin A7	1.061	0.966	1.043	1.023	1.167
NEUG_MOUSE	(P60761) Neurogranin	0.96	0.64	0.843	0.8	0.933
VATC1_MOUSE	(Q9Z1G3) V-type proton ATPase subunit C 1	1.008	1.018	1.075	1.076	1.046
1433T_MOUSE	(P68254) 14-3-3 protein theta	0.919	0.869	1.012	1.034	0.971
PHYIP_MOUSE	(Q8K0S0) Phytanoyl-CoA hydroxylase-interacting protein	0.984	0.939	1.121	1.029	0.965
PGAM1_MOUSE	(Q9DBJ1) Phosphoglycerate mutase 1	0.985	0.896	0.768	1.182	0.883
MMSA_MOUSE	(Q9EQ20) Methylmalonate-semialdehyde dehydrogenase [acylating], mitochondrial	1.099	0.903	1.06	1.087	1.293
AL1A1_MOUSE	(P24549) Retinal dehydrogenase 1	0.972	0.946	1.028	1.147	0.82
C1TC_MOUSE	(Q922D8) C-1-tetrahydrofolate synthase, cytoplasmic	1.012	1.023	1.015	1.003	1.03
C1TM_MOUSE	(Q3V3R1) Monofunctional C1-tetrahydrofolate synthase, mitochondrial	0.925	1.002	0.898	0.984	1.018
LNEBL_MOUSE	(Q9DC07) LIM zinc-binding domain-containing Nebulette	0.913	0.997	0.924	0.951	1.017
ETFB_MOUSE	(Q9DCW4) Electron transfer flavoprotein subunit beta	1.004	0.887	0.957	1.063	1.122
MAP4_MOUSE	(P27546) Microtubule-associated protein 4	0.893	0.943	0.934	1.03	0.768
KAD3_MOUSE	(Q9WTP7) GTP:AMP phosphotransferase, mitochondrial	1.024	1.036	0.988	1.108	1.269
VPS35_MOUSE	(Q9EQH3) Vacuolar protein sorting-associated protein 35	0.922	1.054	0.983	1.037	1.071
TCPD_MOUSE	(P80315) T-complex protein 1 subunit delta	0.926	0.999	1.018	1.017	0.989
RS28_MOUSE	(P62858) 40S ribosomal protein S28	0.756	1.341	0.931	0.871	0.78
THIM_MOUSE	(Q8BWT1) 3-ketoacyl-CoA thiolase, mitochondrial	1.053	0.864	0.901	1.079	1.188
CY1_MOUSE	(Q9D0M3) Cytochrome c1, heme protein, mitochondrial	0.939	0.844	0.749	0.833	0.915
TCPH_MOUSE	(P80313) T-complex protein 1 subunit eta	1.07	0.989	1.016	1.055	0.93
GSTM5_MOUSE	(P48774) Glutathione S-transferase Mu 5	1.095	0.91	0.946	1.105	0.998
PSA_MOUSE	(Q11011) Puromycin-sensitive aminopeptidase	1.003	0.982	1.026	0.992	1.063
ADDA_MOUSE	(Q9QYC0) Alpha-adducin	0.987	1.001	1.064	1.094	0.975
SNAA_MOUSE	(Q9DB05) Alpha-soluble NSF attachment protein	1.044	1.129	1.039	1.051	0.996
VA0D1_MOUSE	(P51863) V-type proton ATPase subunit d 1	0.998	0.704	0.822	0.985	0.854
HPCL4_MOUSE	(Q8BGZ1) Hippocalcin-like protein 4	1.062	0.906	0.817	1.085	0.909
RUFY3_MOUSE	(Q9D394) Protein RUFY3	1.056	0.842	1.006	1.002	1.006
DBNL_MOUSE	(Q62418) Drebrin-like protein	0.981	1.104	1.035	0.907	1.026
S4A10_MOUSE	(Q5DTL9) Sodium-driven chloride bicarbonate exchanger	1.085	0.96	0.964	0.909	0.885
S4A8_MOUSE	(Q8JZR6) Electroneutral sodium bicarbonate exchanger 1	1.11	1.061	1.163	0.988	0.897
ATP5I_MOUSE	(Q06185) ATP synthase subunit e, mitochondrial	0.964	1.432	0.79	1.127	0.99
GNAQ_MOUSE	(P21279) Guanine nucleotide-binding protein G(q) subunit alpha	0.952	1.031	0.998	0.933	0.804
NHRF1_MOUSE	(P70441) Na(+)/H(+) exchange regulatory cofactor NHE-RF1	0.948	0.974	0.933	0.969	0.989
UB2V2_MOUSE	(Q9D2M8) Ubiquitin-conjugating enzyme E2 variant 2	1.005	0.796	0.911	1.033	1.01
AATC_MOUSE	(P05201) Aspartate aminotransferase, cytoplasmic	1.061	0.847	1.099	1.02	1.171
ANK3_MOUSE	(G5E8K5) Ankyrin-3	1.011	0.99	1.267	1.014	1.107
TAU_MOUSE	(P10637) Microtubule-associated protein tau	0.96	1.007	0.865	0.878	0.783
THIO_MOUSE	(P10639) Thioredoxin	0.962	1.102	0.958	0.901	1.044
CA095_MOUSE	(Q0VBF8) Uncharacterized membrane protein C1orf95 homolog	1.224	1.949	1.092	1.07	1.453
NGEF_MOUSE	(Q8CHT1) Ephexin-1	1.081	0.931	1.152	0.859	1.137
BACH_MOUSE	(Q91V12) Cytosolic acyl coenzyme A thioester hydrolase	1.024	0.886	1.037	0.996	1.025
KCD12_MOUSE	(Q6WVG3) BTB/POZ domain-containing protein KCTD12	0.998	1.098	1.024	1.03	0.927
OXR1_MOUSE	(Q4KMM3) Oxidation resistance protein 1	0.982	0.911	0.951	1.018	1.071
ARFG1_MOUSE	(Q9EPJ9) ADP-ribosylation factor GTPase-activating protein 1	1.076	0.825	1.06	0.953	1.384
FSCN1_MOUSE	(Q61553) Fascin	0.932	0.949	0.965	1.05	0.851
ENDD1_MOUSE	(Q8C522) Endonuclease domain-containing 1 protein	0.989	1.212	1.151	1.244	0.829
FAAH1_MOUSE	(O08914) Fatty-acid amide hydrolase 1	1.019	1.155	0.954	1.059	0.893
RTN3_MOUSE	(Q9ES97) Reticulon-3	0.944	0.85	0.973	0.955	0.804
SFXN1_MOUSE	(Q99JR1) Sideroflexin-1	0.99	1.122	0.991	0.866	1.025
ARP3_MOUSE	(Q99JY9) Actin-related protein 3	1.054	0.976	1.024	1.023	1.018
ARP3B_MOUSE	(Q641P0) Actin-related protein 3B	0.973	1.005	0.898	0.972	0.897
S6A17_MOUSE	(Q8BJI1) Sodium-dependent neutral amino acid transporter SLC6A17	0.972	0.943	1.032	0.956	1.044
CLVS1_MOUSE	(Q9D4C9) Clavesin-1	1.049	0.824	1.062	0.924	1.081
RTN1_MOUSE	(Q8K0T0) Reticulon-1	0.951	0.844	1	1.042	0.821
COTL1_MOUSE	(Q9CQI6) Coactosin-like protein	0.794	1.092	1.08	0.938	0.908
GDIR1_MOUSE	(Q99PT1) Rho GDP-dissociation inhibitor 1	0.973	0.836	0.883	1.04	0.911
AT5F1_MOUSE	(Q9CQQ7) ATP synthase subunit b, mitochondrial	0.956	0.931	0.806	0.943	1.016
ASSY_MOUSE	(P16460) Argininosuccinate synthase	1.047	1.064	0.913	1.007	0.915
DLG4_MOUSE	(Q62108) Disks large homolog 4	1.029	1	1.115	1.088	0.929
NDUS6_MOUSE	(P52503) NADH dehydrogenase [ubiquinone] iron-sulfur protein 6, mitochondrial	1.237	1.495	0.703	0.723	1.075
PDE1B_MOUSE	(Q01065) Calcium/calmodulin-dependent 3',5'-cyclic nucleotide phosphodiesterase 1B	1.038	0.957	1.061	0.966	1
ALDH2_MOUSE	(P47738) Aldehyde dehydrogenase, mitochondrial	1.089	1.221	0.995	0.96	1.056
GGT7_MOUSE	(Q99JP7) Gamma-glutamyltransferase 7	1.102	0.868	1.104	1.188	0.843
CAPS1_MOUSE	(Q80TJ1) Calcium-dependent secretion activator 1	0.966	1.141	0.893	1.016	0.926
TRXR2_MOUSE	(Q9JLT4) Thioredoxin reductase 2, mitochondrial	0.999	1.149	0.856	0.939	1.088
IPYR2_MOUSE	(Q91VM9) Inorganic pyrophosphatase 2, mitochondrial	1.221	1.1	1.157	1.153	1.31
LAT1_MOUSE	(Q9Z127) Large neutral amino acids transporter small subunit 1	1.022	1.021	1.308	1.221	1.069
PPCE_MOUSE	(Q9QUR6) Prolyl endopeptidase	1.121	0.969	1.104	1.049	1.073
GNAS2_MOUSE	(P63094) Guanine nucleotide-binding protein G(s) subunit alpha isoforms short	0.927	1.018	1.023	0.95	0.82
PIPNA_MOUSE	(P53810) Phosphatidylinositol transfer protein alpha isoform	1.007	1.006	1.124	0.951	1.072
AUXI_MOUSE	(Q80TZ3) Putative tyrosine-protein phosphatase auxilin	1.066	0.897	1.148	0.999	1.144
PPP5_MOUSE	(Q60676) Serine/threonine-protein phosphatase 5	1.022	0.959	1.154	1.113	0.961
NUCB1_MOUSE	(Q02819) Nucleobindin-1	0.741	1.212	0.956	0.895	0.719
DPP6_MOUSE	(Q9Z218) Dipeptidyl aminopeptidase-like protein 6	1.311	0.853	1.088	1.12	0.923
VTI1B_MOUSE	(O88384) Vesicle transport through interaction with t-SNAREs homolog 1B	0.81	1.083	0.94	0.903	0.818
GNAI1_MOUSE	(B2RSH2) Guanine nucleotide-binding protein G(i) subunit alpha-1	1	0.978	1.036	0.976	0.849
NT5C_MOUSE	(Q9JM14) 5'(3')-deoxyribonucleotidase, cytosolic type	1.885	0.851	0.77	0.818	2.346
STX12_MOUSE	(Q9ER00) Syntaxin-12	0.914	0.903	1.093	0.962	0.826
PP2AA_MOUSE	(P63330) Serine/threonine-protein phosphatase 2A catalytic subunit alpha isoform	0.989	0.905	0.971	0.997	0.979
ADDG_MOUSE	(Q9QYB5) Gamma-adducin	0.966	0.935	1.092	1.039	1.046
GMFB_MOUSE	(Q9CQI3) Glia maturation factor beta	1.029	0.935	1.066	1.019	1.086
NDUAA_MOUSE	(Q99LC3) NADH dehydrogenase [ubiquinone] 1 alpha subcomplex subunit 10, mitochondrial	0.881	0.866	0.507	0.602	0.665
GNAL_MOUSE	(Q8CGK7) Guanine nucleotide-binding protein G(olf) subunit alpha	0.893	0.924	0.937	0.946	0.782
PI51C_MOUSE	(O70161) Phosphatidylinositol 4-phosphate 5-kinase type-1 gamma	0.888	0.879	0.876	0.965	0.822
DHSB_MOUSE	(Q9CQA3) Succinate dehydrogenase [ubiquinone] iron-sulfur subunit, mitochondrial	0.999	0.915	0.931	0.917	1.017
CLPP_MOUSE	(O88696) Putative ATP-dependent Clp protease proteolytic subunit, mitochondrial	0.934	0.817	0.927	0.885	0.909
GPDA_MOUSE	(P13707) Glycerol-3-phosphate dehydrogenase [NAD(+)], cytoplasmic	0.936	0.909	0.955	1.029	0.981
PGM1_MOUSE	(Q9D0F9) Phosphoglucomutase-1	1.101	1.052	1.076	1.044	0.991
MK01_MOUSE	(P63085) Mitogen-activated protein kinase 1	1.039	1.099	1.025	1.067	1.024
MK03_MOUSE	(Q63844) Mitogen-activated protein kinase 3	0.994	1.051	2.351	1.008	1.09
GBG12_MOUSE	(Q9DAS9) Guanine nucleotide-binding protein G(I)/G(S)/G(O) subunit gamma-12	1.229	1.113	1.018	1.253	0.967
STX6_MOUSE	(Q9JKK1) Syntaxin-6	0.955	1.042	1.004	1.111	0.915
WDR37_MOUSE	(Q8CBE3) WD repeat-containing protein 37	0.954	0.915	1.009	1.047	0.98
PABP1_MOUSE	(P29341) Polyadenylate-binding protein 1	0.754	0.944	0.929	0.919	0.697
PDC6I_MOUSE	(Q9WU78) Programmed cell death 6-interacting protein	0.953	1.073	1.066	0.994	1.008
ECHB_MOUSE	(Q99JY0) Trifunctional enzyme subunit beta, mitochondrial	1.076	0.923	1.123	1.234	1.233
AINX_MOUSE	(P46660) Alpha-internexin	1	1.059	0.934	0.913	0.808
NFM_MOUSE	(P08553) Neurofilament medium polypeptide	1.092	1.156	1.041	1.09	0.773
NFL_MOUSE	(P08551) Neurofilament light polypeptide	0.967	1.039	0.955	1.004	0.793
TCPA_MOUSE	(P11983) T-complex protein 1 subunit alpha	0.909	0.806	0.925	0.916	0.809
CD81_MOUSE	(P35762) CD81 antigen	1.093	0.99	1.054	1.246	0.84
ERMIN_MOUSE	(Q5EBJ4) Ermin	0.872	1	0.964	1.094	0.711
ML12B_MOUSE	(Q3THE2) Myosin regulatory light chain 12B	1.02	1.048	1.101	1.073	1.364
CPNE6_MOUSE	(Q9Z140) Copine-6	0.9	1.023	1.049	0.985	1.027
BPHL_MOUSE	(Q8R164) Valacyclovir hydrolase	1.034	0.99	1.042	1.018	1.211
NNRD_MOUSE	(Q9CZ42) ATP-dependent (S)-NAD(P)H-hydrate dehydratase	0.948	1.053	0.976	0.976	1.171
NDUS4_MOUSE	(Q9CXZ1) NADH dehydrogenase [ubiquinone] iron-sulfur protein 4, mitochondrial	0.935	0.934	0.601	0.547	0.751
AATM_MOUSE	(P05202) Aspartate aminotransferase, mitochondrial	1.045	1.096	0.692	1.2	0.934
PRDX2_MOUSE	(Q61171) Peroxiredoxin-2	0.951	0.984	1.019	0.95	0.991
ABHEB_MOUSE	(Q8VCR7) Alpha/beta hydrolase domain-containing protein 14B	1.621	1.72	1.667	0.938	1.542
NCAM2_MOUSE	(O35136) Neural cell adhesion molecule 2	0.931	0.771	0.932	0.929	0.815
DC1L2_MOUSE	(Q6PDL0) Cytoplasmic dynein 1 light intermediate chain 2	0.897	0.737	0.868	1.028	0.807
ASTN1_MOUSE	(Q61137) Astrotactin-1	0.971	0.73	1.193	0.967	1.059
VGLU2_MOUSE	(Q8BLE7) Vesicular glutamate transporter 2	1.148	1.118	1.185	1.124	0.997
CNTP1_MOUSE	(O54991) Contactin-associated protein 1	1.005	0.938	0.868	1.057	0.721
TOM20_MOUSE	(Q9DCC8) Mitochondrial import receptor subunit TOM20 homolog	0.799	1.145	0.663	0.572	1.058
NPTXR_MOUSE	(Q99J85) Neuronal pentraxin receptor	0.951	0.948	1.121	0.999	1.095
EAA1_MOUSE	(P56564) Excitatory amino acid transporter 1	0.948	0.955	1.152	1.567	0.86
CYC_MOUSE	(P62897) Cytochrome c, somatic	0.981	0.866	0.878	1.125	0.893
LPPR4_MOUSE	(Q7TME0) Lipid phosphate phosphatase-related protein type 4	1.062	0.97	0.995	0.992	0.922
DYL2_MOUSE	(Q9D0M5) Dynein light chain 2, cytoplasmic	1.003	0.892	0.868	1.235	0.939
RASL1_MOUSE	(Q9Z268) RasGAP-activating-like protein 1	1.027	1.002	1.049	1.056	1.175
CSN7A_MOUSE	(Q9CZ04) COP9 signalosome complex subunit 7a	1.112	1.132	1.323	1.303	1.236
SRGP3_MOUSE	(Q812A2) SLIT-ROBO Rho GTPase-activating protein 3	1.194	0.808	0.988	0.926	1.064
DCE1_MOUSE	(P48318) Glutamate decarboxylase 1	0.9	0.874	0.977	0.942	1.035
IVD_MOUSE	(Q9JHI5) Isovaleryl-CoA dehydrogenase, mitochondrial	0.994	0.923	0.948	1.032	1.182
ATP5L_MOUSE	ATP synthase subunit g, mitochondrial OS=Mus musculus GN=Atp5l PE=1 SV=1	0.933	0.814	1.031	0.854	3.945
LPPRC_MOUSE	(Q6PB66) Leucine-rich PPR motif-containing protein, mitochondrial	1.056	1.054	0.979	1.037	1.153
3HIDH_MOUSE	(Q99L13) 3-hydroxyisobutyrate dehydrogenase, mitochondrial	1.054	0.88	0.899	1.091	1.141
CADM1_MOUSE	(Q8R5M8) Cell adhesion molecule 1	1.085	0.998	1.178	1.062	0.896
ALG2_MOUSE	(Q9DBE8) Alpha-1,3/1,6-mannosyltransferase ALG2	0.991	1.084	1.113	1.175	0.812
ARF3_MOUSE	(P61205) ADP-ribosylation factor 3	1.139	1.134	1.268	1.079	1.118
SYSC_MOUSE	(P26638) Serine--tRNA ligase, cytoplasmic	0.987	0.923	1.075	1.027	0.97
TTYH3_MOUSE	(Q6P5F7) Protein tweety homolog 3	1.104	0.981	1.048	1.408	0.834
PP1R7_MOUSE	(Q3UM45) Protein phosphatase 1 regulatory subunit 7	0.88	0.981	0.876	0.973	0.766
EPHA4_MOUSE	(Q03137) Ephrin type-A receptor 4	1.109	0.871	1.055	1.096	1.039
HCN1_MOUSE	(O88704) Potassium/sodium hyperpolarization-activated cyclic nucleotide-gated channel 1	0.982	0.97	1.242	1.212	1.019
DHPR_MOUSE	(Q8BVI4) Dihydropteridine reductase	1.518	1.11	2.13	1.125	1.447
ACOT9_MOUSE	(Q9R0X4) Acyl-coenzyme A thioesterase 9, mitochondrial	1.26	1.21	1.381	0.834	1.278
MUTA_MOUSE	(P16332) Methylmalonyl-CoA mutase, mitochondrial	0.877	0.79	0.845	0.913	1.012
COF1_MOUSE	(P18760) Cofilin-1	1.069	0.845	0.877	1.044	1.011
DNJB1_MOUSE	(Q9QYJ3) DnaJ homolog subfamily B member 1	1.036	1.233	1.387	1.008	1.125
RRFM_MOUSE	(Q9D6S7) Ribosome-recycling factor, mitochondrial	0.889	1.031	0.785	0.957	1.036
COX41_MOUSE	(P19783) Cytochrome c oxidase subunit 4 isoform 1, mitochondrial	0.647	1.305	0.398	0.383	0.45
RPGP2_MOUSE	(Q5SVL6) Rap1 GTPase-activating protein 2	0.95	1.033	0.879	1.074	0.882
SHLB2_MOUSE	(Q8R3V5) Endophilin-B2	1.124	0.918	1.207	1.046	1.226
LGI1_MOUSE	(Q9JIA1) Leucine-rich glioma-inactivated protein 1	1.031	1.046	1.054	1.166	0.874
SAHH3_MOUSE	(Q68FL4) Putative adenosylhomocysteinase 3	1.097	1.094	1.144	0.868	0.802
ATCAY_MOUSE	(Q8BHE3) Caytaxin	0.997	0.896	1.181	1.167	1.01
MCU_MOUSE	(Q3UMR5) Calcium uniporter protein, mitochondrial	0.852	1.053	0.598	0.611	0.962
TCPE_MOUSE	(P80316) T-complex protein 1 subunit epsilon	1.001	1.06	1.052	1.049	1.047
DJB11_MOUSE	(Q99KV1) DnaJ homolog subfamily B member 11	0.749	1.252	0.91	0.851	0.665
S12A5_MOUSE	(Q91V14) Solute carrier family 12 member 5	0.966	0.923	1.124	0.934	0.876
SYT12_MOUSE	(Q920N7) Synaptotagmin-12	1.053	0.99	1.011	1.025	1.133
GEPH_MOUSE	(Q8BUV3) Gephyrin	0.986	1.169	1.402	1.021	1.148
MYCT_MOUSE	(Q3UHK1) Proton myo-inositol cotransporter	0.844	1.057	1.098	0.97	0.932
NSF1C_MOUSE	(Q9CZ44) NSFL1 cofactor p47	0.877	0.94	0.946	0.963	0.946
SAR1A_MOUSE	(P36536) GTP-binding protein SAR1a	1.127	1.052	0.965	1.091	0.832
K6PL_MOUSE	(P12382) 6-phosphofructokinase, liver type	1.058	1.039	1.27	1.316	1.248
E41L1_MOUSE	(Q9Z2H5) Band 4.1-like protein 1	1.011	0.952	1.024	1.066	0.907
CHP1_MOUSE	(P61022) Calcineurin B homologous protein 1	0.876	0.965	1.037	1.034	0.882
CATD_MOUSE	(P18242) Cathepsin D	0.894	1.181	0.934	1.123	0.806
AMRP_MOUSE	(P55302) Alpha-2-macroglobulin receptor-associated protein	0.743	1.187	0.924	0.885	0.722
SNX3_MOUSE	(O70492) Sorting nexin-3	0.882	0.98	1.061	1.018	1.162
ODPA_MOUSE	(P35486) Pyruvate dehydrogenase E1 component subunit alpha, somatic form, mitochondrial	0.982	1.226	0.972	0.961	1.092
SCAI_MOUSE	(Q8C8N2) Protein SCAI	1.085	1.041	1.158	1.22	1.188
GTR3_MOUSE	(P32037) Solute carrier family 2, facilitated glucose transporter member 3	1.157	0.987	1.144	1.235	1.058
HAX1_MOUSE	(O35387) HCLS1-associated protein X-1	0.927	0.738	0.886	0.901	1.35
PLXA1_MOUSE	(P70206) Plexin-A1	1.073	0.928	0.936	0.929	0.92
NDUB9_MOUSE	(Q9CQJ8) NADH dehydrogenase [ubiquinone] 1 beta subcomplex subunit 9	1.288	1.457	0.823	0.995	1.369
RALA_MOUSE	(P63321) Ras-related protein Ral-A	0.944	0.786	0.81	0.981	0.804
RALB_MOUSE	(Q9JIW9) Ras-related protein Ral-B	0.969	0.953	0.915	1.049	0.923
COX2_MOUSE	(P00405) Cytochrome c oxidase subunit 2	0.908	1.111	0.496	0.464	0.71
RL14_MOUSE	(Q9CR57) 60S ribosomal protein L14	0.733	1.283	1.153	0.907	0.86
ISCA2_MOUSE	(Q9DCB8) Iron-sulfur cluster assembly 2 homolog, mitochondrial	1.062	0.875	0.814	0.781	1.087
NDUA2_MOUSE	(Q9CQ75) NADH dehydrogenase [ubiquinone] 1 alpha subcomplex subunit 2	1.032	0.956	0.557	0.553	0.87
E41L2_MOUSE	(O70318) Band 4.1-like protein 2	0.929	0.948	0.784	0.976	0.872
COR1A_MOUSE	(O89053) Coronin-1A	0.874	1.004	1.003	1.096	0.924
L2HDH_MOUSE	(Q91YP0) L-2-hydroxyglutarate dehydrogenase, mitochondrial	1.088	1.016	1.193	1.012	1.183
AP3D1_MOUSE	(O54774) AP-3 complex subunit delta-1	1.115	1.043	1.283	1.084	1.102
SYLM_MOUSE	(Q8VDC0) Probable leucine--tRNA ligase, mitochondrial	1.044	1.024	1.045	1.019	1.283
AOFA_MOUSE	(Q64133) Amine oxidase [flavin-containing] A	0.959	1.091	0.86	0.871	1.065
PPM1A_MOUSE	(P49443) Protein phosphatase 1A	1.166	1.104	0.904	0.996	0.932
DDAH1_MOUSE	(Q9CWS0) N(G),N(G)-dimethylarginine dimethylaminohydrolase 1	0.979	0.746	0.842	0.944	0.851
IDHP_MOUSE	(P54071) Isocitrate dehydrogenase [NADP], mitochondrial	1.028	0.87	1.067	1.086	1.322
CNPY2_MOUSE	(Q9QXT0) Protein canopy homolog 2	0.798	1.071	0.824	0.922	0.653
ANXA3_MOUSE	(O35639) Annexin A3	0.775	1.109	0.9	0.792	0.768
NDRG2_MOUSE	(Q9QYG0) Protein NDRG2	1.135	0.997	1.126	0.997	0.925
NLGN3_MOUSE	(Q8BYM5) Neuroligin-3	1.148	0.88	1.06	0.943	1.084
SEPT8_MOUSE	(Q8CHH9) Septin-8	1.133	0.734	1.407	1.363	1.362
SEP11_MOUSE	(Q8C1B7) Septin-11	1.151	0.697	1.478	1.371	1.411
SEPT6_MOUSE	(Q9R1T4) Septin-6	1.171	0.713	1.511	1.379	1.43
CSN8_MOUSE	(Q8VBV7) COP9 signalosome complex subunit 8	1.085	0.981	1.165	0.927	1.061
LNP_MOUSE	(Q7TQ95) Protein lunapark	0.915	1.081	0.971	0.981	0.949
AT1B2_MOUSE	(P14231) Sodium/potassium-transporting ATPase subunit beta-2	0.984	1.236	1.212	1.473	0.755
NDUS7_MOUSE	(Q9DC70) NADH dehydrogenase [ubiquinone] iron-sulfur protein 7, mitochondrial	1.053	1.093	0.714	0.605	0.94
TMEDA_MOUSE	(Q9D1D4) Transmembrane emp24 domain-containing protein 10	0.739	0.989	0.827	1.014	0.675
CYFP2_MOUSE	(Q5SQX6) Cytoplasmic FMR1-interacting protein 2	1.014	1.078	1.037	1.14	0.938
CYFP1_MOUSE	(Q7TMB8) Cytoplasmic FMR1-interacting protein 1	0.917	1.039	0.881	1.048	0.839
DNJA3_MOUSE	(Q99M87) DnaJ homolog subfamily A member 3, mitochondrial	0.944	1.061	0.947	0.894	1.074
KCY_MOUSE	(Q9DBP5) UMP-CMP kinase	1.002	0.935	0.965	0.951	0.856
KPCB_MOUSE	(P68404) Protein kinase C beta type	0.869	0.972	0.799	0.847	0.779
EEA1_MOUSE	(Q8BL66) Early endosome antigen 1	0.931	0.796	0.977	0.965	2.333
SYJ2B_MOUSE	(Q9D6K5) Synaptojanin-2-binding protein	0.989	0.999	0.959	0.962	1.058
SRCN1_MOUSE	(Q9QWI6) SRC kinase signaling inhibitor 1	0.981	1.023	1.102	1.012	1.753
RPN2_MOUSE	(Q9DBG6) Dolichyl-diphosphooligosaccharide--protein glycosyltransferase subunit 2	0.742	1.43	0.958	0.889	0.72
G6PI_MOUSE	(P06745) Glucose-6-phosphate isomerase	1.046	0.964	1.024	1.064	1.06
ITPR1_MOUSE	(P11881) Inositol 1,4,5-trisphosphate receptor type 1	0.96	0.91	0.96	1.043	0.9
PI42B_MOUSE	(Q80XI4) Phosphatidylinositol 5-phosphate 4-kinase type-2 beta	1.007	0.873	1.062	1.023	1.012
NSMA2_MOUSE	(Q9JJY3) Sphingomyelin phosphodiesterase 3	1.122	1.088	1.12	1.097	1.042
AT8A1_MOUSE	(P70704) Probable phospholipid-transporting ATPase IA	1.178	1.12	1.112	1.086	0.924
DNPEP_MOUSE	(Q9Z2W0) Aspartyl aminopeptidase	0.882	0.956	1.05	1.084	1.449
PLBL2_MOUSE	(Q3TCN2) Putative phospholipase B-like 2	0.799	1.047	0.801	0.74	0.768
AK1A1_MOUSE	(Q9JII6) Alcohol dehydrogenase [NADP(+)]	1.048	0.927	1.289	1.137	1.222
TY3H_MOUSE	(P24529) Tyrosine 3-monooxygenase	1.162	1.007	1.175	1.039	0.947
PRS4_MOUSE	(P62192) 26S protease regulatory subunit 4	1.023	0.775	1.042	1.017	1.003
CA2D2_MOUSE	(Q6PHS9) Voltage-dependent calcium channel subunit alpha-2/delta-2	1.199	1.018	0.987	1.084	0.814
CA2D1_MOUSE	(O08532) Voltage-dependent calcium channel subunit alpha-2/delta-1	1.168	0.938	0.94	1.15	0.832
PYRD_MOUSE	(O35435) Dihydroorotate dehydrogenase (quinone), mitochondrial	1.007	0.995	0.826	0.964	1.048
TIPRL_MOUSE	(Q8BH58) TIP41-like protein	0.862	0.74	0.808	0.904	1.001
KCC4_MOUSE	(P08414) Calcium/calmodulin-dependent protein kinase type IV	1.014	0.981	1.057	1.167	0.972
GP158_MOUSE	(Q8C419) Probable G-protein coupled receptor 158	0.816	0.74	0.807	0.813	0.721
MCCB_MOUSE	(Q3ULD5) Methylcrotonoyl-CoA carboxylase beta chain, mitochondrial	1.069	1.021	0.972	0.964	1.082
TM9S2_MOUSE	(P58021) Transmembrane 9 superfamily member 2	0.825	1.353	0.958	0.837	0.997
PPT1_MOUSE	(O88531) Palmitoyl-protein thioesterase 1	0.845	0.868	0.967	0.77	0.812
CAP1_MOUSE	(P40124) Adenylyl cyclase-associated protein 1	0.875	0.932	0.759	0.984	0.841
DPP3_MOUSE	(Q99KK7) Dipeptidyl peptidase 3	0.976	1.085	1.162	1.207	1.011
VAT1_MOUSE	(Q62465) Synaptic vesicle membrane protein VAT-1 homolog	1	0.809	0.798	1.053	0.678
PTPA_MOUSE	(P58389) Serine/threonine-protein phosphatase 2A activator	1.134	1.19	1.048	1.046	1.051
MACD1_MOUSE	(Q922B1) O-acetyl-ADP-ribose deacetylase MACROD1	1.003	1.041	0.943	1.14	1.164
ENSA_MOUSE	(P60840) Alpha-endosulfine	0.897	0.945	1.372	0.937	1.342
RB3GP_MOUSE	(Q80UJ7) Rab3 GTPase-activating protein catalytic subunit	0.979	1.118	1.207	1.004	1.136
MADD_MOUSE	(Q80U28) MAP kinase-activating death domain protein	1.015	0.964	1.389	0.977	1.019
CLCB_MOUSE	(Q6IRU5) Clathrin light chain B	0.979	0.901	0.867	0.965	1.086
NECP1_MOUSE	(Q9CR95) Adaptin ear-binding coat-associated protein 1	1.017	1.017	1.013	1.001	1.049
SPN90_MOUSE	(Q9ESJ4) NCK-interacting protein with SH3 domain	0.844	0.76	1.253	0.81	0.753
NCS1_MOUSE	(Q8BNY6) Neuronal calcium sensor 1	1.035	1.116	1.104	1.122	1.061
SEPT3_MOUSE	(Q9Z1S5) Neuronal-specific septin-3	1.145	0.693	1.134	1.278	1.1
OGT1_MOUSE	(Q8CGY8) UDP-N-acetylglucosamine--peptide N-acetylglucosaminyltransferase 110 kDa subunit	1.14	1.005	1.127	1.055	1.276
MP2K4_MOUSE	(P47809) Dual specificity mitogen-activated protein kinase kinase 4	1.072	1.148	1.074	1.132	0.902
TOLIP_MOUSE	(Q9QZ06) Toll-interacting protein	0.991	1.044	1.223	0.971	1.141
GSHR_MOUSE	(P47791) Glutathione reductase, mitochondrial	1.56	1.279	1.345	1.051	1.103
CD166_MOUSE	(Q61490) CD166 antigen	1.05	0.828	0.903	0.988	0.816
SYWC_MOUSE	(P32921) Tryptophan--tRNA ligase, cytoplasmic	1.079	1.028	1.204	1.183	1.062
AQP4_MOUSE	(P55088) Aquaporin-4	0.843	1.112	1.536	1.76	1.078
SAP_MOUSE	(Q61207) Sulfated glycoprotein 1	0.782	1.183	0.831	0.77	0.836
PCBP2_MOUSE	(Q61990) Poly(rC)-binding protein 2	0.879	1.094	1.145	0.9	1.013
PTPRF_MOUSE	(A2A8L5) Receptor-type tyrosine-protein phosphatase F	1.37	0.934	1.522	1.043	1.124
PTPRD_MOUSE	(Q64487) Receptor-type tyrosine-protein phosphatase delta	0.724	1.215	0.721	0.887	0.797
PURA2_MOUSE	(P46664) Adenylosuccinate synthetase isozyme 2	0.922	0.832	0.811	0.842	0.935
PURA1_MOUSE	(P28650) Adenylosuccinate synthetase isozyme 1	0.987	0.96	1.331	0.942	1.219
ACTZ_MOUSE	(P61164) Alpha-centractin	1.011	1.019	1.186	1.129	0.994
ACTY_MOUSE	(Q8R5C5) Beta-centractin	0.989	0.974	1.215	1.112	0.999
TCTP_MOUSE	(P63028) Translationally-controlled tumor protein	0.956	0.92	0.757	1.107	0.887
PDDC1_MOUSE	(Q8BFQ8) Parkinson disease 7 domain-containing protein 1	1.076	1.149	1.195	1.092	1.038
PGTA_MOUSE	(Q9JHK4) Geranylgeranyl transferase type-2 subunit alpha	1.056	0.963	1.11	0.995	1
PDXK_MOUSE	(Q8K183) Pyridoxal kinase	1.102	0.941	1.363	1.074	1.129
FKB1A_MOUSE	(P26883) Peptidyl-prolyl cis-trans isomerase FKBP1A	0.96	0.879	0.842	0.93	0.924
PCYXL_MOUSE	(Q8C7K6) Prenylcysteine oxidase-like	0.813	1.245	0.957	0.862	0.736
VP13C_MOUSE	(Q8BX70) Vacuolar protein sorting-associated protein 13C	1.132	1.037	1.179	1.112	1.068
WDR1_MOUSE	(O88342) WD repeat-containing protein 1	1.029	0.782	0.795	1.053	0.856
OLA1_MOUSE	(Q9CZ30) Obg-like ATPase 1	1.071	0.962	1.08	1.092	1.027
VDAC2_MOUSE	(Q60930) Voltage-dependent anion-selective channel protein 2	0.965	1.17	0.73	0.641	1.367
ENOPH_MOUSE	(Q8BGB7) Enolase-phosphatase E1	1.015	0.939	1.025	0.989	1.095
S10A1_MOUSE	(P56565) Protein S100-A1	0.934	0.824	0.737	0.952	0.891
K6PF_MOUSE	(P47857) 6-phosphofructokinase, muscle type	1.05	1.127	1.003	1.142	2.102
BDH_MOUSE	(Q80XN0) D-beta-hydroxybutyrate dehydrogenase, mitochondrial	1.043	1.042	0.98	1.085	1.268
SCAM1_MOUSE	(Q8K021) Secretory carrier-associated membrane protein 1	1.049	1.191	1.214	1.051	1.045
PRAF3_MOUSE	(Q8R5J9) PRA1 family protein 3	0.907	0.984	0.993	0.932	0.855
TMX4_MOUSE	(Q8C0L0) Thioredoxin-related transmembrane protein 4	0.898	1.295	1.297	0.995	1.015
NDUV1_MOUSE	(Q91YT0) NADH dehydrogenase [ubiquinone] flavoprotein 1, mitochondrial	0.946	0.959	0.676	0.621	0.758
SGIP1_MOUSE	(Q8VD37) SH3-containing GRB2-like protein 3-interacting protein 1	0.992	0.837	1.012	1.1	0.85
AMPL_MOUSE	(Q9CPY7) Cytosol aminopeptidase	1.114	1.095	0.966	0.871	1.021
B2L13_MOUSE	(P59017) Bcl-2-like protein 13	0.981	0.931	0.856	0.845	1.043
ADDB_MOUSE	(Q9QYB8) Beta-adducin	1.09	1.016	1.173	1.094	1
HECAM_MOUSE	(Q640R3) Hepatocyte cell adhesion molecule	0.899	1.067	1.064	1.351	1.038
GNA11_MOUSE	(P21278) Guanine nucleotide-binding protein subunit alpha-11	0.982	0.815	0.952	0.966	0.899
EXOC2_MOUSE	(Q9D4H1) Exocyst complex component 2	1.066	0.956	0.943	1.033	1.1
CTBP1_MOUSE	(O88712) C-terminal-binding protein 1	1.023	0.762	0.819	1.245	0.962
CTBP2_MOUSE	(P56546) C-terminal-binding protein 2	1.005	0.743	0.756	1.34	0.83
CDC37_MOUSE	(Q61081) Hsp90 co-chaperone Cdc37	0.906	0.868	0.98	0.937	0.912
PDE1A_MOUSE	(Q61481) Calcium/calmodulin-dependent 3',5'-cyclic nucleotide phosphodiesterase 1A	0.997	1.053	1.048	0.92	1.075
CLCA_MOUSE	(O08585) Clathrin light chain A	1.09	0.941	0.959	1.117	1.156
IPO5_MOUSE	(Q8BKC5) Importin-5	1.045	1.012	0.887	1.076	0.941
LRP1_MOUSE	(Q91ZX7) Prolow-density lipoprotein receptor-related protein 1	0.797	0.924	0.749	0.947	0.694
CDC42_MOUSE	(P60766) Cell division control protein 42 homolog	0.885	0.856	0.78	0.938	0.789
SNP47_MOUSE	(Q8R570) Synaptosomal-associated protein 47	1.012	0.977	1.033	0.994	1.049
PLXA4_MOUSE	(Q80UG2) Plexin-A4	1.134	1.011	1.109	0.848	1.122
DNJB6_MOUSE	(O54946) DnaJ homolog subfamily B member 6	0.928	1.031	1.088	1.039	0.969
KAP0_MOUSE	(Q9DBC7) cAMP-dependent protein kinase type I-alpha regulatory subunit	0.691	0.955	1.131	1.057	1.078
PFD3_MOUSE	(P61759) Prefoldin subunit 3	0.953	1.207	0.995	1.026	0.935
MBLC2_MOUSE	(Q8BL86) Metallo-beta-lactamase domain-containing protein 2	0.988	1.151	1.008	0.962	0.937
IF4A1_MOUSE	(P60843) Eukaryotic initiation factor 4A-I	0.958	1.018	1.022	0.956	0.903
WWP1_MOUSE	(Q8BZZ3) NEDD4-like E3 ubiquitin-protein ligase WWP1	1.008	0.98	1.254	1.028	1
CADH2_MOUSE	(P15116) Cadherin-2	0.966	1.469	1.584	0.99	1.562
DP13B_MOUSE	(Q8K3G9) DCC-interacting protein 13-beta	0.859	1.116	1.024	0.884	1.514
VDAC3_MOUSE	(Q60931) Voltage-dependent anion-selective channel protein 3	0.98	1.195	0.925	0.725	1.537
TPPP3_MOUSE	(Q9CRB6) Tubulin polymerization-promoting protein family member 3	0.863	1.103	0.843	0.987	0.705
CHCH3_MOUSE	(Q9CRB9) Coiled-coil-helix-coiled-coil-helix domain-containing protein 3, mitochondrial	0.931	0.949	0.446	0.452	1.164
ACOC_MOUSE	(P28271) Cytoplasmic aconitate hydratase	1.322	1.225	2.043	1.051	1.945
BGAL_MOUSE	(P23780) Beta-galactosidase	0.779	0.975	0.892	0.751	0.87
ITPA_MOUSE	(Q9D892) Inosine triphosphate pyrophosphatase	1.035	0.892	0.871	0.991	0.94
AIFM1_MOUSE	(Q9Z0X1) Apoptosis-inducing factor 1, mitochondrial	1.047	0.953	0.776	0.832	0.976
NRX1A_MOUSE	(Q9CS84) Neurexin-1	0.998	0.923	1.051	0.938	0.87
STML2_MOUSE	(Q99JB2) Stomatin-like protein 2, mitochondrial	0.999	1.212	1.359	0.863	1.2
VP26A_MOUSE	(P40336) Vacuolar protein sorting-associated protein 26A	1.201	1.047	1.261	0.991	1.142
LIGO1_MOUSE	(Q9D1T0) Leucine-rich repeat and immunoglobulin-like domain-containing nogo receptor-interacting protein 1	1.02	0.808	0.926	0.895	1.105
K0513_MOUSE	(Q8R0A7) Uncharacterized protein KIAA0513	1.115	0.825	0.978	1.02	1.045
CKAP4_MOUSE	(Q8BMK4) Cytoskeleton-associated protein 4	0.593	1.398	0.927	0.852	0.63
NDUAD_MOUSE	(Q9ERS2) NADH dehydrogenase [ubiquinone] 1 alpha subcomplex subunit 13	0.899	0.797	0.571	0.609	0.698
NP1L1_MOUSE	(P28656) Nucleosome assembly protein 1-like 1	0.803	0.837	0.85	0.876	0.735
RL31_MOUSE	(P62900) 60S ribosomal protein L31	0.881	1.303	1.04	0.825	0.881
GPD1L_MOUSE	(Q3ULJ0) Glycerol-3-phosphate dehydrogenase 1-like protein	1.12	0.964	0.969	1.132	1.066
SEPT2_MOUSE	(P42208) Septin-2	1.29	0.549	1.386	1.08	1.193
PEX5R_MOUSE	(Q8C437) PEX5-related protein	1.09	1.041	2.129	1.075	1.149
GRAP1_MOUSE	(Q8VD04) GRIP1-associated protein 1	1.238	1.179	1.227	1.142	1.431
GRM3_MOUSE	(Q9QYS2) Metabotropic glutamate receptor 3	0.975	0.955	0.972	1.234	0.769
RAC2_MOUSE	(Q05144) Ras-related C3 botulinum toxin substrate 2	1.035	1.148	1.134	1.116	0.931
GHC1_MOUSE	(Q9D6M3) Mitochondrial glutamate carrier 1	0.945	1.169	0.668	0.845	0.989
PROF2_MOUSE	(Q9JJV2) Profilin-2	1.015	0.965	0.96	1.153	1.028
SCMC2_MOUSE	(A2ASZ8) Calcium-binding mitochondrial carrier protein SCaMC-2	0.898	1.147	0.855	0.791	0.98
PRS7_MOUSE	(P46471) 26S protease regulatory subunit 7	0.984	1.061	1.317	0.966	1.084
ECHM_MOUSE	(Q8BH95) Enoyl-CoA hydratase, mitochondrial	1.022	1.053	1.219	1.054	1.302
RHG01_MOUSE	(Q5FWK3) Rho GTPase-activating protein 1	1.19	0.942	1.099	1.037	1.227
SUGT1_MOUSE	(Q9CX34) Suppressor of G2 allele of SKP1 homolog	1.019	1.105	0.852	1.049	0.976
CALB2_MOUSE	(Q08331) Calretinin	0.969	0.913	1.113	1.016	0.885
NCEH1_MOUSE	(Q8BLF1) Neutral cholesterol ester hydrolase 1	0.976	1.258	1.314	0.944	0.971
AFG32_MOUSE	(Q8JZQ2) AFG3-like protein 2	1.003	1.176	1.039	1.016	1.153
GRPE1_MOUSE	(Q99LP6) GrpE protein homolog 1, mitochondrial	0.972	0.965	0.862	0.881	1.034
JIP3_MOUSE	(Q9ESN9) C-Jun-amino-terminal kinase-interacting protein 3	0.897	0.843	1.091	1.147	0.904
ARF5_MOUSE	(P84084) ADP-ribosylation factor 5	1.037	0.833	0.917	1.031	1.032
K1468_MOUSE	(Q148V7) LisH domain and HEAT repeat-containing protein KIAA1468	1.033	0.854	1.043	1.025	1.076
OCAD1_MOUSE	(Q9CRD0) OCIA domain-containing protein 1	1.041	0.999	0.83	0.779	1.049
HMGCL_MOUSE	(P38060) Hydroxymethylglutaryl-CoA lyase, mitochondrial	1.007	0.746	0.911	0.966	1.093
SC22B_MOUSE	(O08547) Vesicle-trafficking protein SEC22b	0.927	1.025	0.939	0.937	0.921
S10AD_MOUSE	(P97352) Protein S100-A13	0.992	0.98	0.935	0.877	0.966
TI8AB_MOUSE	(Q4FZG7) Putative mitochondrial import inner membrane translocase subunit Tim8 A-B	1.058	0.842	0.804	0.824	0.997
PPID_MOUSE	(Q9CR16) Peptidyl-prolyl cis-trans isomerase D	0.959	0.968	1.037	0.94	0.957
DIRA2_MOUSE	(Q5PR73) GTP-binding protein Di-Ras2	0.956	0.889	0.919	0.89	0.971
BCAT1_MOUSE	(P24288) Branched-chain-amino-acid aminotransferase, cytosolic	1.173	1.081	1.095	0.94	1.186
CLYBL_MOUSE	(Q8R4N0) Citrate lyase subunit beta-like protein, mitochondrial	1.001	0.999	1.029	1.111	1.277
ABCB7_MOUSE	(Q61102) ATP-binding cassette sub-family B member 7, mitochondrial	1.21	1.045	0.845	1.121	1.155
DDX1_MOUSE	(Q91VR5) ATP-dependent RNA helicase DDX1	0.795	1.514	1.837	1.065	0.831
RB11B_MOUSE	(P46638) Ras-related protein Rab-11B	0.985	1.234	0.975	0.902	0.978
SYIM_MOUSE	(Q8BIJ6) Isoleucine--tRNA ligase, mitochondrial	0.991	0.85	0.851	0.968	1.066
STAM1_MOUSE	(P70297) Signal transducing adapter molecule 1	0.904	0.898	0.845	0.999	0.979
STMN1_MOUSE	(P54227) Stathmin	0.92	0.811	0.868	0.881	0.87
STMN2_MOUSE	(P55821) Stathmin-2	0.921	0.808	0.865	0.884	0.866
STMN3_MOUSE	(O70166) Stathmin-3	0.954	0.987	1.018	0.901	0.945
CSK21_MOUSE	(Q60737) Casein kinase II subunit alpha	1.021	1.113	1.002	1.092	0.987
ACOT2_MOUSE	(Q9QYR9) Acyl-coenzyme A thioesterase 2, mitochondrial	0.961	0.936	1.055	1.008	1.368
SC23A_MOUSE	(Q01405) Protein transport protein Sec23A	0.935	1.031	0.964	0.976	0.92
EMC4_MOUSE	(Q9CZX9) ER membrane protein complex subunit 4	0.941	2.139	1.52	0.785	1.468
THNS1_MOUSE	(Q8BH55) Threonine synthase-like 1	1.173	1.151	0.986	0.925	1.167
PPME1_MOUSE	(Q8BVQ5) Protein phosphatase methylesterase 1	1.021	0.867	0.786	1.072	0.831
PDK2_MOUSE	(Q9JK42) [Pyruvate dehydrogenase [lipoamide]] kinase isozyme 2, mitochondrial	0.987	0.905	0.965	0.795	1.097
SYG_MOUSE	(Q9CZD3) Glycine--tRNA ligase	0.973	0.928	1.149	1.01	1.032
NB5R1_MOUSE	(Q9DB73) NADH-cytochrome b5 reductase 1	1.069	1.115	0.87	0.985	0.997
RASM_MOUSE	(O08989) Ras-related protein M-Ras	1.127	1.241	0.896	1.5	1.682
RAB18_MOUSE	(P35293) Ras-related protein Rab-18	1.002	0.93	0.996	1.076	0.971
HSC20_MOUSE	(Q8K3A0) Iron-sulfur cluster co-chaperone protein HscB, mitochondrial	1.64	1.233	1.747	0.977	0.801
SYT7_MOUSE	(Q9R0N7) Synaptotagmin-7	1.151	1.069	1.107	1.338	1.181
ARSB_MOUSE	(P50429) Arylsulfatase B	0.913	1.104	1.031	0.939	0.841
NDUS8_MOUSE	(Q8K3J1) NADH dehydrogenase [ubiquinone] iron-sulfur protein 8, mitochondrial	0.94	0.867	0.526	0.594	0.741
ETFA_MOUSE	(Q99LC5) Electron transfer flavoprotein subunit alpha, mitochondrial	0.986	1.035	0.773	1.034	1.151
FABD_MOUSE	(Q8R3F5) Malonyl-CoA-acyl carrier protein transacylase, mitochondrial	1.111	1.059	0.791	1.014	1.171
CHMP6_MOUSE	(P0C0A3) Charged multivesicular body protein 6	0.989	1.302	1.457	0.748	1.318
CSPG5_MOUSE	(Q71M36) Chondroitin sulfate proteoglycan 5	1.019	0.807	1.007	1.089	0.829
PAK1_MOUSE	(O88643) Serine/threonine-protein kinase PAK 1	1.035	0.802	0.811	0.922	0.876
PAK2_MOUSE	(Q8CIN4) Serine/threonine-protein kinase PAK 2	0.875	1.118	0.964	1.032	0.842
PURA_MOUSE	(P42669) Transcriptional activator protein Pur-alpha	1.261	0.909	0.9	1.164	0.756
HYES_MOUSE	(P34914) Bifunctional epoxide hydrolase 2	1.207	1.516	0.938	1.036	1.368
NUDC_MOUSE	(O35685) Nuclear migration protein nudC	1.061	1.049	1.176	1	1.109
BSN_MOUSE	(O88737) Protein bassoon	0.999	0.964	1.071	0.948	1.643
ARMC6_MOUSE	(Q8BNU0) Armadillo repeat-containing protein 6	0.969	0.928	1.01	0.971	1.039
XPP1_MOUSE	(Q6P1B1) Xaa-Pro aminopeptidase 1	1.131	1.086	1.294	0.993	1.153
ECI1_MOUSE	(P42125) Enoyl-CoA delta isomerase 1, mitochondrial	1.037	0.676	0.876	1.024	1.031
MTMR5_MOUSE	(Q6ZPE2) Myotubularin-related protein 5	1.041	0.89	1.145	1.035	1.123
HIP1R_MOUSE	(Q9JKY5) Huntingtin-interacting protein 1-related protein	0.99	0.912	0.989	0.85	1.083
CACB2_MOUSE	(Q8CC27) Voltage-dependent L-type calcium channel subunit beta-2	0.937	0.95	0.971	0.904	1.031
XPO2_MOUSE	(Q9ERK4) Exportin-2	1.017	1.06	0.983	1.077	1.007
CYTC_MOUSE	(P21460) Cystatin-C	1.023	1.016	0.872	0.774	0.927
LGMN_MOUSE	(O89017) Legumain	0.767	1.183	0.914	0.908	0.727
DCE2_MOUSE	(P48320) Glutamate decarboxylase 2	1.078	1.021	1.369	1.3	1.12
PRRT1_MOUSE	(O35449) Proline-rich transmembrane protein 1	1.259	1.405	0.983	0.927	0.866
STX7_MOUSE	(O70439) Syntaxin-7	0.883	0.878	0.981	0.989	0.757
NDUS5_MOUSE	(Q99LY9) NADH dehydrogenase [ubiquinone] iron-sulfur protein 5	1.036	1.361	0.574	0.63	0.791
SFXN5_MOUSE	(Q925N0) Sideroflexin-5	0.894	0.847	0.703	0.858	0.921
TOM6_MOUSE	(Q9CQN3) Mitochondrial import receptor subunit TOM6 homolog	0.926	2.038	0.877	0.471	1.755
FAF2_MOUSE	(Q3TDN2) FAS-associated factor 2	1.002	1.23	1.094	1.008	1.105
PAIRB_MOUSE	(Q9CY58) Plasminogen activator inhibitor 1 RNA-binding protein	0.834	1.132	0.82	0.945	0.716
MPP6_MOUSE	(Q9JLB0) MAGUK p55 subfamily member 6	1.047	0.981	1.069	0.999	1.069
SNAG_MOUSE	(Q9CWZ7) Gamma-soluble NSF attachment protein	0.979	0.949	0.994	1.11	0.856
PLM_MOUSE	(Q9Z239) Phospholemman	0.943	0.961	1.404	1.355	0.815
FERM2_MOUSE	(Q8CIB5) Fermitin family homolog 2	1.177	0.927	0.913	0.895	1.858
GBG4_MOUSE	(P50153) Guanine nucleotide-binding protein G(I)/G(S)/G(O) subunit gamma-4	1.009	0.854	1.115	0.856	0.769
ASAP1_MOUSE	(Q9QWY8) Arf-GAP with SH3 domain, ANK repeat and PH domain-containing protein 1	0.931	0.673	0.847	0.945	0.784
AOFB_MOUSE	(Q8BW75) Amine oxidase [flavin-containing] B	0.922	1.086	1.002	0.813	0.94
EFTS_MOUSE	(Q9CZR8) Elongation factor Ts, mitochondrial	1.138	1.12	1.091	0.977	1.05
PRVA_MOUSE	(P32848) Parvalbumin alpha	1.402	0.875	1.654	1.021	1.407
LYRIC_MOUSE	(Q80WJ7) Protein LYRIC	0.863	1.354	0.9	0.831	0.76
ATP5H_MOUSE	(Q9DCX2) ATP synthase subunit d, mitochondrial	0.981	0.756	0.643	0.771	0.792
GLRX5_MOUSE	(Q80Y14) Glutaredoxin-related protein 5, mitochondrial	0.935	0.85	0.939	0.907	1.082
SBP2_MOUSE	(Q63836) Selenium-binding protein 2	1.047	1.092	1.033	1.168	1.03
IF4H_MOUSE	(Q9WUK2) Eukaryotic translation initiation factor 4H	0.968	1.125	1.026	0.908	0.995
EFHD2_MOUSE	(Q9D8Y0) EF-hand domain-containing protein D2	0.974	1.042	0.65	0.789	1.005
TCPG_MOUSE	(P80318) T-complex protein 1 subunit gamma	1.048	0.943	1.086	1.005	0.985
CAZA2_MOUSE	(P47754) F-actin-capping protein subunit alpha-2	0.816	1.061	0.839	0.85	0.839
GLU2B_MOUSE	(O08795) Glucosidase 2 subunit beta	0.846	1.219	1.017	0.954	0.761
HCDH_MOUSE	(Q61425) Hydroxyacyl-coenzyme A dehydrogenase, mitochondrial	1.01	0.765	0.924	1.054	1.091
PPTC7_MOUSE	(Q6NVE9) Protein phosphatase PTC7 homolog	1.158	1.158	1.261	1.012	1.178
TSNAX_MOUSE	(Q9QZE7) Translin-associated protein X	0.927	0.932	0.977	0.823	0.914
CPLX2_MOUSE	(P84086) Complexin-2	1.082	0.856	0.934	0.958	1.095
TIGAR_MOUSE	(Q8BZA9) Fructose-2,6-bisphosphatase TIGAR	1.059	1.156	1.305	1.014	1.309
ACADS_MOUSE	(Q07417) Short-chain specific acyl-CoA dehydrogenase, mitochondrial	1.031	0.986	1.051	1.095	1.225
DNJC3_MOUSE	(Q91YW3) DnaJ homolog subfamily C member 3	0.752	1.234	0.983	0.827	0.683
ACPM_MOUSE	(Q9CR21) Acyl carrier protein, mitochondrial	1.051	1.668	0.591	0.948	0.846
IDHC_MOUSE	(O88844) Isocitrate dehydrogenase [NADP] cytoplasmic	0.81	0.787	0.747	0.933	0.788
GCDH_MOUSE	(Q60759) Glutaryl-CoA dehydrogenase, mitochondrial	1.004	1.643	1.304	1.326	1.117
RM09_MOUSE	(Q99N94) 39S ribosomal protein L9, mitochondrial	0.855	1.247	1.902	0.827	0.955
PCLO_MOUSE	(Q9QYX7) Protein piccolo	0.877	0.868	0.904	1.103	1.072
F108B_MOUSE	(Q7M759) Abhydrolase domain-containing protein FAM108B1	1.071	0.993	1.724	0.863	1.715
HAP28_MOUSE	(Q3UHX2) 28 kDa heat- and acid-stable phosphoprotein	1.028	0.883	0.799	0.968	0.916
MPPB_MOUSE	(Q9CXT8) Mitochondrial-processing peptidase subunit beta	1.049	1.09	1.133	0.987	1.388
UGPA_MOUSE	(Q91ZJ5) UTP--glucose-1-phosphate uridylyltransferase	0.999	0.845	0.784	0.834	1.047
VATG1_MOUSE	(Q9CR51) V-type proton ATPase subunit G 1	1.083	1.088	1.028	1.13	1.04
RL40_MOUSE	(P62984) Ubiquitin-60S ribosomal protein L40	1.058	1.29	1.059	1.284	1.266
VPS53_MOUSE	(Q8CCB4) Vacuolar protein sorting-associated protein 53 homolog	1.026	1.009	1.124	0.985	1.086
MRP_MOUSE	(P28667) MARCKS-related protein	1.075	0.994	0.908	0.85	0.936
AP2S1_MOUSE	(P62743) AP-2 complex subunit sigma	1.527	0.872	1.945	1.113	1.131
AP3S1_MOUSE	(Q9DCR2) AP-3 complex subunit sigma-1	1.133	0.955	1.336	1.19	1.337
EFGM_MOUSE	(Q8K0D5) Elongation factor G, mitochondrial	0.98	1.026	0.907	0.863	1.07
TBCE_MOUSE	(Q8CIV8) Tubulin-specific chaperone E	1.294	0.806	1.192	0.94	1.236
SH3L1_MOUSE	(Q9JJU8) SH3 domain-binding glutamic acid-rich-like protein	1.08	0.926	1.128	0.959	1.016
CYB5_MOUSE	(P56395) Cytochrome b5	1.422	1.247	1.288	1.03	0.926
PUR6_MOUSE	(Q9DCL9) Multifunctional protein ADE2	1.044	0.934	1.042	0.963	0.944
NMT1_MOUSE	(O70310) Glycylpeptide N-tetradecanoyltransferase 1	1.067	0.972	0.976	1.069	1.018
PPR3F_MOUSE	(Q9JIG4) Protein phosphatase 1 regulatory subunit 3F	0.801	0.992	0.961	0.809	0.868
VAT1L_MOUSE	(Q80TB8) Synaptic vesicle membrane protein VAT-1 homolog-like	1.041	1.192	1.174	1.076	0.946
SH3L3_MOUSE	(Q91VW3) SH3 domain-binding glutamic acid-rich-like protein 3	0.846	0.99	0.855	0.841	0.95
NPDC1_MOUSE	(Q64322) Neural proliferation differentiation and control protein 1	0.845	0.788	0.962	1.126	0.762
GCSH_MOUSE	(Q91WK5) Glycine cleavage system H protein, mitochondrial	0.852	0.867	0.79	0.92	0.925
NPTN_MOUSE	(P97300) Neuroplastin	1.167	1.048	1.069	1.214	0.976
BAIP2_MOUSE	(Q8BKX1) Brain-specific angiogenesis inhibitor 1-associated protein 2	0.895	1.448	0.988	0.989	0.87
KPCE_MOUSE	(P16054) Protein kinase C epsilon type	0.922	1.107	0.769	0.889	0.969
CHCH6_MOUSE	(Q91VN4) Coiled-coil-helix-coiled-coil-helix domain-containing protein 6, mitochondrial	0.959	1.062	0.625	0.449	1.263
GBLP_MOUSE	(P68040) Guanine nucleotide-binding protein subunit beta-2-like 1	0.89	1.219	0.866	0.829	0.798
CAMLG_MOUSE	(P49070) Calcium signal-modulating cyclophilin ligand	0.918	1.176	1.051	0.96	1.065
REEP2_MOUSE	(Q8VCD6) Receptor expression-enhancing protein 2	0.987	1.042	0.993	0.869	0.913
PSMD3_MOUSE	(P14685) 26S proteasome non-ATPase regulatory subunit 3	1.017	1.119	1.046	1.027	1.001
PDK3_MOUSE	(Q922H2) [Pyruvate dehydrogenase [lipoamide]] kinase isozyme 3, mitochondrial	1.21	0.97	1.095	1.057	1.426
GAS7_MOUSE	(Q60780) Growth arrest-specific protein 7	1.076	0.97	3.542	0.942	3.081
FXYD7_MOUSE	(P59648) FXYD domain-containing ion transport regulator 7	0.995	0.983	0.787	0.842	1.451
NDUC2_MOUSE	NADH dehydrogenase [ubiquinone] 1 subunit C2 OS=Mus musculus GN=Ndufc2 PE=1 SV=1	1.036	0.982	0.616	0.565	0.831
2ABA_MOUSE	(Q6P1F6) Serine/threonine-protein phosphatase 2A 55 kDa regulatory subunit B alpha isoform	0.928	1.002	1.062	1.02	1.393
2ABG_MOUSE	(Q8BG02) Serine/threonine-protein phosphatase 2A 55 kDa regulatory subunit B gamma isoform	0.969	1.09	1.272	1.03	1.899
AGAP3_MOUSE	(Q8VHH5) Arf-GAP with GTPase, ANK repeat and PH domain-containing protein 3	1.061	1.047	1.031	0.976	1.109
PLD3_MOUSE	(O35405) Phospholipase D3	0.805	1.114	0.931	0.854	0.894
RYR2_MOUSE	(E9Q401) Ryanodine receptor 2	1.04	0.931	1.034	0.993	0.958
EAA3_MOUSE	(P51906) Excitatory amino acid transporter 3	1.084	0.987	1.571	1.637	0.82
FAHD1_MOUSE	(Q8R0F8) Acylpyruvase FAHD1, mitochondrial	0.972	0.998	0.918	1.402	1.009
ERLN1_MOUSE	(Q91X78) Erlin-1	0.922	1.217	1.021	0.858	0.805
CSDE1_MOUSE	(Q91W50) Cold shock domain-containing protein E1	1.013	1.198	1.096	0.935	1.022
BIG1_MOUSE	(G3X9K3) Brefeldin A-inhibited guanine nucleotide-exchange protein 1	1.064	0.865	1.098	1.034	1.008
OSBL1_MOUSE	(Q91XL9) Oxysterol-binding protein-related protein 1	0.995	0.986	1.136	1.062	1.057
KLC1_MOUSE	(O88447) Kinesin light chain 1	1.121	0.961	1.072	0.95	0.927
RS6_MOUSE	(P62754) 40S ribosomal protein S6	0.815	1.387	1.024	0.881	0.97
PGRC1_MOUSE	(O55022) Membrane-associated progesterone receptor component 1	0.911	1.266	1.087	0.973	1
QOR_MOUSE	(P47199) Quinone oxidoreductase	0.711	0.683	0.576	0.87	0.87
USP9X_MOUSE	(P70398) Probable ubiquitin carboxyl-terminal hydrolase FAF-X	0.914	0.941	1.048	0.892	0.965
LRP1B_MOUSE	(Q9JI18) Low-density lipoprotein receptor-related protein 1B	1.005	1.023	1.408	0.773	0.858
MTOR_MOUSE	(Q9JLN9) Serine/threonine-protein kinase mTOR	1.048	1.008	1.048	1.058	0.97
NLGN2_MOUSE	(Q69ZK9) Neuroligin-2	1.09	0.81	1.084	0.99	1.034
LGUL_MOUSE	(Q9CPU0) Lactoylglutathione lyase	1.015	0.899	0.919	1.08	1.04
PI42C_MOUSE	(Q91XU3) Phosphatidylinositol 5-phosphate 4-kinase type-2 gamma	1.223	1.353	0.942	1.24	0.852
NFS1_MOUSE	(Q9Z1J3) Cysteine desulfurase, mitochondrial	0.961	0.765	0.81	1.04	1.008
MECR_MOUSE	(Q9DCS3) Trans-2-enoyl-CoA reductase, mitochondrial	1.042	0.941	1.069	1.202	1.207
NEC2_MOUSE	(P21661) Neuroendocrine convertase 2	0.931	0.717	0.906	0.875	0.748
LIN7A_MOUSE	(Q8JZS0) Protein lin-7 homolog A	1.043	0.847	1.068	1.082	1.06
ACADM_MOUSE	(P45952) Medium-chain specific acyl-CoA dehydrogenase, mitochondrial	1.066	1.03	1.046	1.024	1.21
G6PD1_MOUSE	(Q00612) Glucose-6-phosphate 1-dehydrogenase X	0.952	1.149	1.208	0.999	0.901
B3GA3_MOUSE	(P58158) Galactosylgalactosylxylosylprotein 3-beta-glucuronosyltransferase 3	0.859	1.357	0.97	0.956	1.053
ARL8A_MOUSE	(Q8VEH3) ADP-ribosylation factor-like protein 8A	0.874	0.835	0.939	0.928	0.837
CP46A_MOUSE	(Q9WVK8) Cholesterol 24-hydroxylase	0.883	1.044	0.964	0.954	0.761
MCCA_MOUSE	(Q99MR8) Methylcrotonoyl-CoA carboxylase subunit alpha, mitochondrial	0.95	1.139	1.124	0.993	1.164
CF211_MOUSE	(A6H630) UPF0364 protein C6orf211 homolog	0.955	1.033	0.983	1.131	0.924
CLIP2_MOUSE	(Q9Z0H8) CAP-Gly domain-containing linker protein 2	0.828	1.179	0.745	1.076	0.739
CAN2_MOUSE	(O08529) Calpain-2 catalytic subunit	1.122	1.005	1.117	1.008	1.056
RT26_MOUSE	(Q80ZS3) 28S ribosomal protein S26, mitochondrial	1.13	1.178	1.102	0.989	1.352
PUR9_MOUSE	(Q9CWJ9) Bifunctional purine biosynthesis protein PURH	1.092	1.16	1.176	0.952	1.092
TACO1_MOUSE	(Q8K0Z7) Translational activator of cytochrome c oxidase 1	1.014	1.125	0.979	0.976	1.206
EPS15_MOUSE	(P42567) Epidermal growth factor receptor substrate 15	1.024	0.992	0.935	0.927	1.021
PRS6B_MOUSE	(P54775) 26S protease regulatory subunit 6B	0.889	0.662	0.901	1	0.745
HNRPK_MOUSE	(P61979) Heterogeneous nuclear ribonucleoprotein K	0.929	1.392	1.029	0.983	0.771
SELM_MOUSE	(Q8VHC3) Selenoprotein M	0.759	0.993	0.96	0.812	0.624
PRDX1_MOUSE	(P35700) Peroxiredoxin-1	0.989	0.969	1.03	0.933	0.973
PACS1_MOUSE	(Q8K212) Phosphofurin acidic cluster sorting protein 1	0.934	0.898	0.964	1.179	0.941
EPN1_MOUSE	(Q80VP1) Epsin-1	1.075	1.159	1.248	1.092	1.146
ATLA1_MOUSE	(Q8BH66) Atlastin-1	0.916	0.818	0.852	0.898	0.813
GDE1_MOUSE	(Q9JL56) Glycerophosphodiester phosphodiesterase 1	0.916	1.177	1.014	1.14	0.96
KCAB2_MOUSE	(P62482) Voltage-gated potassium channel subunit beta-2	1.047	0.946	0.784	0.924	0.786
BIG2_MOUSE	(A2A5R2) Brefeldin A-inhibited guanine nucleotide-exchange protein 2	0.953	0.985	1.176	1.26	0.741
MIRO1_MOUSE	(Q8BG51) Mitochondrial Rho GTPase 1	0.923	0.925	1.092	0.694	0.944
RANG_MOUSE	(P34022) Ran-specific GTPase-activating protein	1.079	0.847	0.954	1.01	0.893
NB5R3_MOUSE	(Q9DCN2) NADH-cytochrome b5 reductase 3	0.766	0.919	0.946	0.799	0.955
HOME1_MOUSE	(Q9Z2Y3) Homer protein homolog 1	0.873	0.783	0.558	0.831	0.534
UBQL2_MOUSE	(Q9QZM0) Ubiquilin-2	1.681	1.819	1.727	0.962	1.781
TSC2_MOUSE	(Q61037) Tuberin	0.893	1.06	1.217	0.914	2.082
CALB1_MOUSE	(P12658) Calbindin	1.332	0.813	1.308	1.188	1.445
ACADL_MOUSE	(P51174) Long-chain specific acyl-CoA dehydrogenase, mitochondrial	2.023	2.319	2.229	1.35	2.404
ABD12_MOUSE	(Q99LR1) Monoacylglycerol lipase ABHD12	0.79	0.897	0.82	0.803	0.75
RNF11_MOUSE	(Q9QYK7) RING finger protein 11	0.929	0.94	0.971	1.031	1.056
ARM10_MOUSE	(Q9D0L7) Armadillo repeat-containing protein 10	0.814	0.87	0.971	0.773	0.832
NEUL_MOUSE	(Q91YP2) Neurolysin, mitochondrial	0.957	0.853	0.92	1.036	1.109
PRAF2_MOUSE	(Q9JIG8) PRA1 family protein 2	0.993	1.02	1.083	1.141	0.929
SH3G3_MOUSE	(Q62421) Endophilin-A3	1.09	0.9	1.177	1.026	1.153
CTNB1_MOUSE	(Q02248) Catenin beta-1	0.964	0.95	0.89	1.111	1.129
PTN5_MOUSE	(P54830) Tyrosine-protein phosphatase non-receptor type 5	0.838	0.953	1.02	0.924	0.808
TOM70_MOUSE	(Q9CZW5) Mitochondrial import receptor subunit TOM70	0.896	0.965	0.696	0.856	0.912
DTNA_MOUSE	(Q9D2N4) Dystrobrevin alpha	0.883	0.657	0.855	1.017	0.916
HIBCH_MOUSE	(Q8QZS1) 3-hydroxyisobutyryl-CoA hydrolase, mitochondrial	0.979	0.95	0.807	0.977	1.097
FUND2_MOUSE	(Q9D6K8) FUN14 domain-containing protein 2	0.972	1.098	0.734	0.903	1.019
AP1S1_MOUSE	(P61967) AP-1 complex subunit sigma-1A	0.773	1.04	1.361	0.728	1.243
VINC_MOUSE	(Q64727) Vinculin	1.013	1.174	1.088	1.035	1.104
ABCD3_MOUSE	(P55096) ATP-binding cassette sub-family D member 3	1.434	1.106	1.25	0.8	1.401
EXOG_MOUSE	(Q8C163) Nuclease EXOG, mitochondrial	0.875	1.213	0.946	0.893	1.072
APOE_MOUSE	(P08226) Apolipoprotein E	0.865	1.302	1.298	0.885	1.034
PITH1_MOUSE	(Q8BWR2) PITH domain-containing protein 1	0.963	0.732	0.949	1.033	0.831
PPR21_MOUSE	(Q3TDD9) Protein phosphatase 1 regulatory subunit 21	1.196	1.003	0.947	0.988	0.948
SLK_MOUSE	(O54988) STE20-like serine/threonine-protein kinase	1.116	0.885	1.062	0.945	0.991
ACAD9_MOUSE	(Q8JZN5) Acyl-CoA dehydrogenase family member 9, mitochondrial	0.94	1.081	1.059	0.947	1.218
MARCS_MOUSE	(P26645) Myristoylated alanine-rich C-kinase substrate	0.983	0.947	1.194	1.087	1.238
SYDC_MOUSE	(Q922B2) Aspartate--tRNA ligase, cytoplasmic	1.004	1.075	1.357	0.957	0.952
RCN1_MOUSE	(Q05186) Reticulocalbin-1	0.839	1.216	1.003	0.806	0.757
NU4M_MOUSE	NADH-ubiquinone oxidoreductase chain 4 OS=Mus musculus GN=Mtnd4 PE=1 SV=1	1.003	1.026	0.679	0.487	1.02
HYEP_MOUSE	(Q9D379) Epoxide hydrolase 1	1.4	1.365	1.716	1.293	1.635
SCG1_MOUSE	(P16014) Secretogranin-1	1.077	1.007	1.106	1.067	1.079
DLG2_MOUSE	(Q91XM9) Disks large homolog 2	0.97	0.758	0.912	0.893	1.06
NDUBB_MOUSE	(O09111) NADH dehydrogenase [ubiquinone] 1 beta subcomplex subunit 11, mitochondrial	0.994	0.978	0.75	0.732	0.859
GBB3_MOUSE	(Q61011) Guanine nucleotide-binding protein G(I)/G(S)/G(T) subunit beta-3	3.139	2.22	1.888	1.086	0.884
WFS1_MOUSE	(P56695) Wolframin	0.977	1.001	1.036	1.13	0.894
AGK_MOUSE	(Q9ESW4) Acylglycerol kinase, mitochondrial	1.054	1.055	1.101	0.967	1.224
LANC2_MOUSE	(Q9JJK2) LanC-like protein 2	1.171	1.097	1.152	1.034	1.152
SNG1_MOUSE	(O55100) Synaptogyrin-1	1.011	1.043	0.842	0.971	1.045
BCAS3_MOUSE	(Q8CCN5) Breast carcinoma-amplified sequence 3 homolog	1.007	1.01	1.057	1.023	1.114
GNA13_MOUSE	(P27601) Guanine nucleotide-binding protein subunit alpha-13	1.042	0.934	1.145	0.975	0.99
TECR_MOUSE	(Q9CY27) Very-long-chain enoyl-CoA reductase	0.82	1.239	0.938	1.181	0.833
PGP_MOUSE	(Q8CHP8) Phosphoglycolate phosphatase	1.247	1.095	0.912	0.929	0.914
PRUNE_MOUSE	(Q8BIW1) Protein prune homolog	0.989	0.788	1.012	0.96	0.939
ITSN1_MOUSE	(Q9Z0R4) Intersectin-1	1.158	0.986	2.144	0.854	1.56
NOMO1_MOUSE	(Q6GQT9) Nodal modulator 1	0.981	1.148	1.69	1.237	1.145
ADA23_MOUSE	(Q9R1V7) Disintegrin and metalloproteinase domain-containing protein 23	1.023	0.91	1.405	0.957	1.207
PACR_MOUSE	(P70205) Pituitary adenylate cyclase-activating polypeptide type I receptor	1.428	1.284	1.729	1.148	1.498
TSSC1_MOUSE	(Q8K0G5) Protein TSSC1	0.944	0.959	1.1	0.997	1.098
TCAL5_MOUSE	(Q8CCT4) Transcription elongation factor A protein-like 5	1.197	1.016	1.575	1.102	1.524
SNX6_MOUSE	(Q6P8X1) Sorting nexin-6	1.119	1.011	1.132	1.093	1.104
DNJA2_MOUSE	(Q9QYJ0) DnaJ homolog subfamily A member 2	0.85	0.965	0.821	0.94	1.019
FGF1_MOUSE	(P61148) Fibroblast growth factor 1	1.043	1.114	0.989	1.007	1.143
PSB1_MOUSE	(O09061) Proteasome subunit beta type-1	1.225	0.842	1.253	1.131	1.252
GLOD4_MOUSE	(Q9CPV4) Glyoxalase domain-containing protein 4	0.988	1.014	0.922	0.898	1.021
CNN3_MOUSE	(Q9DAW9) Calponin-3	1.078	1.082	1.163	1.127	1.071
SC31A_MOUSE	(Q3UPL0) Protein transport protein Sec31A	0.91	1.049	1.004	0.994	0.911
PICA_MOUSE	(Q7M6Y3) Phosphatidylinositol-binding clathrin assembly protein	1.104	1.263	1.219	1.436	1.154
OSBP1_MOUSE	(Q3B7Z2) Oxysterol-binding protein 1	1.162	0.622	1.311	1.094	0.983
CRYAB_MOUSE	(P23927) Alpha-crystallin B chain	0.893	1.143	0.839	1.051	0.89
F213A_MOUSE	(Q9CYH2) Redox-regulatory protein FAM213A	0.882	0.861	0.844	0.924	1.043
DLG3_MOUSE	(P70175) Disks large homolog 3	0.97	1.145	1.094	1.029	0.966
PGM2L_MOUSE	(Q8CAA7) Glucose 1,6-bisphosphate synthase	1.058	1.028	1.014	1.028	1.099
PSD12_MOUSE	(Q9D8W5) 26S proteasome non-ATPase regulatory subunit 12	1.186	1.367	0.979	1.174	1.169
P5CS_MOUSE	(Q9Z110) Delta-1-pyrroline-5-carboxylate synthase	0.966	0.971	1.14	1.022	1.17
WDFY3_MOUSE	(Q6VNB8) WD repeat and FYVE domain-containing protein 3	1.338	1.16	1.451	1.315	1.242
ZNT9_MOUSE	(Q5IRJ6) Zinc transporter 9	1.033	1.178	1.096	0.929	1.135
RL19_MOUSE	(P84099) 60S ribosomal protein L19	0.801	1.51	1.085	1.015	0.916
PTPRS_MOUSE	(B0V2N1) Receptor-type tyrosine-protein phosphatase S	1.066	0.976	1.098	1.213	1.072
ARHG2_MOUSE	(Q60875) Rho guanine nucleotide exchange factor 2	1.001	1.153	0.969	0.984	0.999
HSDL2_MOUSE	(Q2TPA8) Hydroxysteroid dehydrogenase-like protein 2	0.959	1.083	1.012	1.004	1.129
MLEC_MOUSE	(Q6ZQI3) Malectin	0.671	1.224	0.857	0.791	0.658
COX5B_MOUSE	(P19536) Cytochrome c oxidase subunit 5B, mitochondrial	0.937	1.52	0.6	0.712	0.782
ALAT1_MOUSE	(Q8QZR5) Alanine aminotransferase 1	0.984	1.008	0.886	0.975	0.935
FRIH_MOUSE	(P09528) Ferritin heavy chain	1.26	1.317	1.647	1.513	1.111
SATT_MOUSE	(O35874) Neutral amino acid transporter A	0.774	1.396	1.453	1.602	0.767
AHSA1_MOUSE	(Q8BK64) Activator of 90 kDa heat shock protein ATPase homolog 1	1.036	0.945	0.981	1.091	0.956
TPD54_MOUSE	(Q9CYZ2) Tumor protein D54	1.035	1.043	1.151	1.045	1.136
QCR2_MOUSE	(Q9DB77) Cytochrome b-c1 complex subunit 2, mitochondrial	0.77	1.381	0.699	0.843	1.468
CBR1_MOUSE	(P48758) Carbonyl reductase [NADPH] 1	0.798	0.808	0.798	0.918	0.839
7B2_MOUSE	(P12961) Neuroendocrine protein 7B2	1.16	1.304	1.53	1.294	1.119
DLRB1_MOUSE	(P62627) Dynein light chain roadblock-type 1	0.958	1.216	1.164	1.1	1.001
TM163_MOUSE	(Q8C996) Transmembrane protein 163	1.043	1.104	1.124	1.008	0.976
ABCB8_MOUSE	(Q9CXJ4) ATP-binding cassette sub-family B member 8, mitochondrial	0.947	1.117	0.826	0.913	1.081
LFG2_MOUSE	(Q8K097) Protein lifeguard 2	0.909	0.742	0.762	0.845	0.689
DDX3Y_MOUSE	(Q62095) ATP-dependent RNA helicase DDX3Y	0.853	1.327	1.074	0.949	0.894
KGUA_MOUSE	(Q64520) Guanylate kinase	0.939	0.679	0.744	0.883	0.927
FOLH1_MOUSE	(O35409) Glutamate carboxypeptidase 2	0.897	0.8	1.235	1.403	0.938
DIP2B_MOUSE	(Q3UH60) Disco-interacting protein 2 homolog B	0.487	0.634	0.94	0.548	0.799
GBRA1_MOUSE	(P62812) Gamma-aminobutyric acid receptor subunit alpha-1	0.991	1.009	1.005	0.948	0.911
DHB4_MOUSE	(P51660) Peroxisomal multifunctional enzyme type 2	0.923	1.147	1.069	0.875	1.035
CBPE_MOUSE	(Q00493) Carboxypeptidase E	1.032	1.244	1.547	0.924	1.233
TDRKH_MOUSE	(Q80VL1) Tudor and KH domain-containing protein	1.089	1.171	1.002	0.884	1.336
INP4A_MOUSE	(Q9EPW0) Type I inositol 3,4-bisphosphate 4-phosphatase	1.126	1.149	1.46	0.882	4.639
RABE1_MOUSE	(O35551) Rab GTPase-binding effector protein 1	0.996	0.938	1.551	0.936	1.323
PGCB_MOUSE	(Q61361) Brevican core protein	1.041	1.056	1.209	1.327	0.936
CPNE1_MOUSE	(Q8C166) Copine-1	1.029	1.063	0.974	1.023	0.95
CSKI1_MOUSE	(Q6P9K8) Caskin-1	0.925	1.013	0.988	1.091	0.909
RS3A_MOUSE	(P97351) 40S ribosomal protein S3a	0.542	1.135	0.618	0.803	0.896
NP1L4_MOUSE	(Q78ZA7) Nucleosome assembly protein 1-like 4	1.281	1.69	0.991	1.046	1.15
SERC1_MOUSE	(Q9QZI8) Serine incorporator 1	0.967	1.166	0.991	1.111	0.844
SERPH_MOUSE	(P19324) Serpin H1	0.828	1.299	0.862	1.055	0.907
DREB_MOUSE	(Q9QXS6) Drebrin	1.105	0.911	1.008	0.885	1.211
MTPN_MOUSE	(P62774) Myotrophin	1.001	0.961	0.931	1.065	1.085
NFH_MOUSE	(P19246) Neurofilament heavy polypeptide	1.116	1.07	1.064	1.146	0.926
RL9_MOUSE	(P51410) 60S ribosomal protein L9	0.553	1.084	0.869	0.761	0.633
NUBPL_MOUSE	(Q9CWD8) Iron-sulfur protein NUBPL	1.143	0.799	0.969	0.971	0.993
UK114_MOUSE	(P52760) Ribonuclease UK114	1.098	1.055	1.014	1.224	1.005
QCR7_MOUSE	(Q9D855) Cytochrome b-c1 complex subunit 7	0.969	1.184	0.712	0.786	0.9
CAH2_MOUSE	(P00920) Carbonic anhydrase 2	0.939	0.801	0.794	1.227	0.708
GRB2_MOUSE	(Q60631) Growth factor receptor-bound protein 2	0.855	0.987	0.84	0.953	0.779
CMC2_MOUSE	(Q9QXX4) Calcium-binding mitochondrial carrier protein Aralar2	0.845	1.235	1.376	0.805	1.358
PIMT_MOUSE	(P23506) Protein-L-isoaspartate(D-aspartate) O-methyltransferase	1.052	1.123	0.89	1.019	1.029
CYTM1_MOUSE	(Q8K353) Cysteine-rich and transmembrane domain-containing protein 1	0.998	0.914	0.986	0.996	0.9
BRK1_MOUSE	(Q91VR8) Protein BRICK1	1.168	1.232	1.01	0.869	1.107
CAD13_MOUSE	(Q9WTR5) Cadherin-13	1.103	1.114	1.201	0.873	1.21
VATD_MOUSE	(P57746) V-type proton ATPase subunit D	0.996	0.694	0.765	1.065	0.853
FBX2_MOUSE	(Q80UW2) F-box only protein 2	1.043	0.984	0.89	1.056	1.057
AGFG1_MOUSE	(Q8K2K6) Arf-GAP domain and FG repeat-containing protein 1	1.01	1.18	0.916	0.971	1.385
PPIB_MOUSE	(P24369) Peptidyl-prolyl cis-trans isomerase B	0.791	1.24	1.009	0.902	0.802
APBA1_MOUSE	(B2RUJ5) Amyloid beta A4 precursor protein-binding family A member 1	1.404	1.496	1.455	1.13	1.722
ELOB_MOUSE	(P62869) Transcription elongation factor B polypeptide 2	1.016	0.881	1.038	0.967	1.024
6PGD_MOUSE	(Q9DCD0) 6-phosphogluconate dehydrogenase, decarboxylating	0.974	0.89	0.888	1.022	0.879
VAPB_MOUSE	(Q9QY76) Vesicle-associated membrane protein-associated protein B	0.82	0.819	0.908	0.898	0.675
STAR9_MOUSE	(Q80TF6) StAR-related lipid transfer protein 9	0.905	1.246	1.05	1.083	1.134
RLA1_MOUSE	(P47955) 60S acidic ribosomal protein P1	0.387	0.954	0.752	0.605	0.555
TPH2_MOUSE	(Q8CGV2) Tryptophan 5-hydroxylase 2	0.948	1.075	1.271	0.954	1.208
SYRC_MOUSE	(Q9D0I9) Arginine--tRNA ligase, cytoplasmic	0.898	1.051	1.019	0.927	0.885
CATA_MOUSE	(P24270) Catalase	0.931	1.177	1.211	1.055	1.146
ABCB9_MOUSE	(Q9JJ59) ATP-binding cassette sub-family B member 9	0.806	1.381	1.897	1.306	1.64
DNJC5_MOUSE	(P60904) DnaJ homolog subfamily C member 5	0.972	0.919	0.923	1.23	0.812
TSN7_MOUSE	(Q62283) Tetraspanin-7	0.843	0.848	0.995	0.879	1.256
NUDT3_MOUSE	(Q9JI46) Diphosphoinositol polyphosphate phosphohydrolase 1	1.075	1.078	1.054	0.953	1.23
DYL1_MOUSE	(P63168) Dynein light chain 1, cytoplasmic	1.167	1.072	0.811	1.372	0.774
FABP5_MOUSE	(Q05816) Fatty acid-binding protein, epidermal	0.973	1.022	1.067	1.035	1.028
RT27_MOUSE	(Q8BK72) 28S ribosomal protein S27, mitochondrial	0.966	0.869	0.792	0.862	0.929
VAS1_MOUSE	(Q9R1Q9) V-type proton ATPase subunit S1	1.06	1.279	0.976	0.883	1.877
PP1RB_MOUSE	(Q8K1L5) Protein phosphatase 1 regulatory subunit 11	0.841	0.965	1.224	1.013	1.075
ACSF2_MOUSE	(Q8VCW8) Acyl-CoA synthetase family member 2, mitochondrial	0.968	0.911	1.073	1.266	1.247
STX8_MOUSE	(O88983) Syntaxin-8	1.011	1.288	1.087	1.148	0.921
NRX3A_MOUSE	(Q6P9K9) Neurexin-3	1.297	0.631	1.201	1.027	1.083
TAGL3_MOUSE	(Q9R1Q8) Transgelin-3	0.92	1.166	0.769	0.912	0.795
CRK_MOUSE	(Q64010) Adapter molecule crk	0.944	0.835	1.02	1.096	1.081
PGAM5_MOUSE	(Q8BX10) Serine/threonine-protein phosphatase PGAM5, mitochondrial	0.962	0.875	0.949	0.895	1.195
MLC1_MOUSE	(Q8VHK5) Membrane protein MLC1	1.163	1.288	2.43	1.025	3.799
PENK_MOUSE	(P22005) Proenkephalin-A	1.098	1.149	1.129	1.137	1.039
NT5D3_MOUSE	(Q3UHB1) 5'-nucleotidase domain-containing protein 3	1.016	1.019	0.89	1.033	0.991
RL17_MOUSE	(Q9CPR4) 60S ribosomal protein L17	0.715	1.104	0.851	0.922	0.664
MTFP1_MOUSE	(Q9CRB8) Mitochondrial fission process protein 1	0.985	1.087	0.892	0.808	1.019
CRYM_MOUSE	(O54983) Thiomorpholine-carboxylate dehydrogenase	1.079	1.014	1.151	1.048	1.201
IMPCT_MOUSE	(O55091) Protein IMPACT	0.889	0.834	0.957	0.915	0.824
CA198_MOUSE	(Q8C3W1) Uncharacterized protein C1orf198 homolog	0.931	0.862	0.937	0.883	1.265
LONM_MOUSE	(Q8CGK3) Lon protease homolog, mitochondrial	1.025	0.941	0.977	1.122	1.212
AL1B1_MOUSE	(Q9CZS1) Aldehyde dehydrogenase X, mitochondrial	0.923	0.997	0.893	0.918	1.083
SCFD1_MOUSE	(Q8BRF7) Sec1 family domain-containing protein 1	0.905	1.098	1.114	0.961	0.892
ODBA_MOUSE	(P50136) 2-oxoisovalerate dehydrogenase subunit alpha, mitochondrial	1.154	1.133	1.222	1.016	1.509
PSD11_MOUSE	(Q8BG32) 26S proteasome non-ATPase regulatory subunit 11	1.086	0.808	1.158	0.909	1.268
PLSL_MOUSE	(Q61233) Plastin-2	0.82	0.97	1.328	0.986	0.875
K2C5_MOUSE	(Q922U2) Keratin, type II cytoskeletal 5	0.782	0.068	0.672	0.63	0.583
RT31_MOUSE	(Q61733) 28S ribosomal protein S31, mitochondrial	0.826	0.913	0.764	0.896	0.966
SCN8A_MOUSE	(Q9WTU3) Sodium channel protein type 8 subunit alpha	1.075	1.045	0.954	1.136	0.838
LPP3_MOUSE	(Q99JY8) Lipid phosphate phosphohydrolase 3	0.967	1.023	1.596	2.115	0.692
SC6A1_MOUSE	(P31648) Sodium- and chloride-dependent GABA transporter 1	0.998	1.353	0.838	1.039	0.914
CRTC1_MOUSE	(Q68ED7) CREB-regulated transcription coactivator 1	0.619	0.977	0.874	0.759	0.805
MFF_MOUSE	(Q6PCP5) Mitochondrial fission factor	0.875	1.118	0.848	0.998	1.016
NRCAM_MOUSE	(Q810U4) Neuronal cell adhesion molecule	1.005	1.004	1.093	1.078	0.948
RUVB2_MOUSE	(Q9WTM5) RuvB-like 2	1.13	1.126	1.116	0.978	0.987
NAKD1_MOUSE	(Q8C5H8) NAD kinase domain-containing protein 1, mitochondrial	0.97	0.976	1.113	1.06	1.128
CSN2_MOUSE	(P61202) COP9 signalosome complex subunit 2	1.083	1.033	1.034	1.128	0.871
NDUA3_MOUSE	(Q9CQ91) NADH dehydrogenase [ubiquinone] 1 alpha subcomplex subunit 3	1.232	1.116	0.702	0.762	0.769
NAMPT_MOUSE	(Q99KQ4) Nicotinamide phosphoribosyltransferase	1.177	1.284	1.134	1.089	1.16
ARMC1_MOUSE	(Q9D7A8) Armadillo repeat-containing protein 1	0.837	1.189	0.845	0.734	1.165
DDI2_MOUSE	(A2ADY9) Protein DDI1 homolog 2	1.045	1.047	1.07	1.079	0.978
VGLU1_MOUSE	(Q3TXX4) Vesicular glutamate transporter 1	1.045	0.71	0.772	0.951	0.946
AL7A1_MOUSE	(Q9DBF1) Alpha-aminoadipic semialdehyde dehydrogenase	0.977	1.107	0.821	1.056	0.992
CDIPT_MOUSE	(Q8VDP6) CDP-diacylglycerol--inositol 3-phosphatidyltransferase	0.86	1.184	1.136	0.971	0.859
TXNL1_MOUSE	(Q8CDN6) Thioredoxin-like protein 1	0.833	0.928	0.95	0.911	0.794
COPA_MOUSE	(Q8CIE6) Coatomer subunit alpha	0.823	0.962	0.937	1.016	0.582
FRS1L_MOUSE	(B1AXV0) DOMON domain-containing protein FRRS1L	0.977	1.099	0.939	0.967	0.992
AL4A1_MOUSE	(Q8CHT0) Delta-1-pyrroline-5-carboxylate dehydrogenase, mitochondrial	0.96	0.629	0.635	0.74	0.741
RT28_MOUSE	(Q9CY16) 28S ribosomal protein S28, mitochondrial	1.061	0.728	0.884	0.884	1.171
TPPC3_MOUSE	(O55013) Trafficking protein particle complex subunit 3	1.066	1.068	1.156	1.069	1.093
USMG5_MOUSE	(Q78IK2) Up-regulated during skeletal muscle growth protein 5	1.064	0.904	0.79	1.011	1.069
PGRC2_MOUSE	(Q80UU9) Membrane-associated progesterone receptor component 2	0.919	1.037	1.06	0.814	0.874
KPCD_MOUSE	(P28867) Protein kinase C delta type	1.006	1.042	1.166	1.079	1.025
NENF_MOUSE	(Q9CQ45) Neudesin	0.877	1.332	1.233	1.053	0.918
RM46_MOUSE	(Q9EQI8) 39S ribosomal protein L46, mitochondrial	1.24	1.142	1.655	1.061	2.019
TOM34_MOUSE	(Q9CYG7) Mitochondrial import receptor subunit TOM34	1.029	1.093	0.956	0.8	0.808
PLST_MOUSE	(Q99K51) Plastin-3	1.51	0.857	1.268	1.479	1.282
MIMIT_MOUSE	(Q59J78) Mimitin, mitochondrial	1.204	1.001	1.096	0.876	1.173
ASAH1_MOUSE	(Q9WV54) Acid ceramidase	0.866	1.166	0.97	0.861	0.941
AP3M2_MOUSE	(Q8R2R9) AP-3 complex subunit mu-2	1.025	0.955	1.113	0.992	1.08
RN214_MOUSE	(Q8BFU3) RING finger protein 214	1.056	0.988	0.829	1.03	0.78
GRIA4_MOUSE	(Q9Z2W8) Glutamate receptor 4	1.05	0.877	0.84	0.955	0.849
GRIA2_MOUSE	(P23819) Glutamate receptor 2	0.933	0.795	0.914	0.893	0.908
TRIM2_MOUSE	(Q9ESN6) Tripartite motif-containing protein 2	0.992	0.969	0.802	1.065	0.835
FKBP2_MOUSE	(P45878) Peptidyl-prolyl cis-trans isomerase FKBP2	0.6	1.06	0.485	0.863	0.41
PTPRG_MOUSE	(Q05909) Receptor-type tyrosine-protein phosphatase gamma	0.984	0.98	1.037	1.237	0.794
ANK1_MOUSE	(Q02357) Ankyrin-1	1.106	1.11	1.244	1.171	1.07
TWF1_MOUSE	(Q91YR1) Twinfilin-1	0.954	1.151	1.089	0.957	0.684
SPTB1_MOUSE	(P15508) Spectrin beta chain, erythrocytic	1.074	0.958	1.106	1.16	0.908
ACTN1_MOUSE	(Q7TPR4) Alpha-actinin-1	1.151	0.935	1.198	1.227	0.978
RS8_MOUSE	(P62242) 40S ribosomal protein S8	0.769	1.108	0.797	1.002	0.761
L1CAM_MOUSE	(P11627) Neural cell adhesion molecule L1	0.999	1.163	1.052	1.089	0.87
PLCX3_MOUSE	(Q8BLJ3) PI-PLC X domain-containing protein 3	1.174	0.946	1.78	1.014	1.54
APBA2_MOUSE	(P98084) Amyloid beta A4 precursor protein-binding family A member 2	0.883	1.092	1.371	0.974	1.38
VIAAT_MOUSE	(O35633) Vesicular inhibitory amino acid transporter	0.929	0.895	1.453	0.947	1.072
ABR_MOUSE	(Q5SSL4) Active breakpoint cluster region-related protein	1.112	1.114	1.062	0.984	1.224
DCTN4_MOUSE	(Q8CBY8) Dynactin subunit 4	0.849	0.839	0.982	0.922	0.798
P33MX_MOUSE	(Q9DBN4) Putative monooxygenase p33MONOX	0.892	1.055	1.181	0.555	1.366
CAPZB_MOUSE	(P47757) F-actin-capping protein subunit beta	0.912	0.979	0.97	0.964	0.934
FLOT1_MOUSE	(O08917) Flotillin-1	1.381	0.601	0.693	0.869	1.091
GTR1_MOUSE	(P17809) Solute carrier family 2, facilitated glucose transporter member 1	0.971	1.028	1.215	1.55	0.729
ADHX_MOUSE	(P28474) Alcohol dehydrogenase class-3	0.999	0.952	0.899	0.893	1.05
SUCB2_MOUSE	(Q9Z2I8) Succinyl-CoA ligase [GDP-forming] subunit beta, mitochondrial	1.081	0.915	1.197	1.236	1.458
HRG1_MOUSE	(Q9D8M3) Heme transporter HRG1	0.739	0.974	0.94	0.671	0.98
SYYC_MOUSE	(Q91WQ3) Tyrosine--tRNA ligase, cytoplasmic	0.973	1.079	1.119	1.101	1.009
EIF3A_MOUSE	(P23116) Eukaryotic translation initiation factor 3 subunit A	0.92	1.322	1.225	0.933	0.894
RHG44_MOUSE	(Q5SSM3) Rho GTPase-activating protein 44	0.947	0.959	1.008	1.03	1.182
GAPD1_MOUSE	(Q6PAR5) GTPase-activating protein and VPS9 domain-containing protein 1	1.067	1.877	1.005	1.361	1.069
MARE3_MOUSE	(Q6PER3) Microtubule-associated protein RP/EB family member 3	1.065	1	0.897	1.178	0.815
GBRG2_MOUSE	(P22723) Gamma-aminobutyric acid receptor subunit gamma-2	0.898	0.685	0.728	0.9	0.757
COA6_MOUSE	(Q8BGD8) Cytochrome c oxidase assembly factor 6 homolog	1.111	1.069	0.911	0.606	1.041
YKT6_MOUSE	(Q9CQW1) Synaptobrevin homolog YKT6	0.968	0.804	0.887	1.011	0.939
MYPT1_MOUSE	(Q9DBR7) Protein phosphatase 1 regulatory subunit 12A	1.125	0.9	0.955	1.044	0.907
PPA6_MOUSE	(Q8BP40) Lysophosphatidic acid phosphatase type 6	1.054	0.735	1.015	0.913	1.092
BASI_MOUSE	(P18572) Basigin	1.029	0.973	1.182	1.21	1.001
TPIS_MOUSE	(P17751) Triosephosphate isomerase	1.039	1.308	0.842	0.851	0.96
CC132_MOUSE	(Q8CI71) Coiled-coil domain-containing protein 132	1.19	1.042	0.986	0.995	0.919
HEM6_MOUSE	(P36552) Coproporphyrinogen-III oxidase, mitochondrial	1.042	1.097	0.865	0.869	1.176
KAD4_MOUSE	(Q9WUR9) Adenylate kinase isoenzyme 4, mitochondrial	1.126	0.976	0.716	0.886	0.944
RBGP1_MOUSE	(A2AWA9) Rab GTPase-activating protein 1	1.025	0.889	0.969	1.002	0.883
ORN_MOUSE	(Q9D8S4) Oligoribonuclease, mitochondrial	0.98	0.912	0.908	0.987	0.965
MYOV2_MOUSE	(Q3U898) Myeloma-overexpressed gene 2 protein homolog	0.902	0.66	2.24	1.141	1.724
GFAP_MOUSE	(P03995) Glial fibrillary acidic protein	0.964	1.229	0.844	0.738	1.566
NICA_MOUSE	(P57716) Nicastrin	1.005	0.962	0.841	1.149	0.737
ROGDI_MOUSE	(Q3TDK6) Protein rogdi homolog	1.105	0.839	0.822	1.059	0.974
IF5_MOUSE	(P59325) Eukaryotic translation initiation factor 5	0.987	1.023	1.051	0.932	0.986
LTOR1_MOUSE	(Q9CQ22) Ragulator complex protein LAMTOR1	1.011	0.992	0.725	0.818	1.003
PMM1_MOUSE	(O35621) Phosphomannomutase 1	0.991	0.918	0.979	1.046	1.079
UB2L3_MOUSE	(P68037) Ubiquitin-conjugating enzyme E2 L3	0.928	1.025	1.054	0.899	0.879
ECSIT_MOUSE	(Q9QZH6) Evolutionarily conserved signaling intermediate in Toll pathway, mitochondrial	0.842	0.933	0.868	0.795	0.969
CAPR1_MOUSE	(Q60865) Caprin-1	0.795	0.997	0.663	0.913	0.705
SYVM_MOUSE	(Q3U2A8) Valine--tRNA ligase, mitochondrial	0.936	0.735	0.774	0.785	1.044
PLAP_MOUSE	(P27612) Phospholipase A-2-activating protein	0.965	0.935	1.176	0.923	1.074
IPYR_MOUSE	(Q9D819) Inorganic pyrophosphatase	0.983	0.955	0.792	1.044	0.697
VTI1A_MOUSE	(O89116) Vesicle transport through interaction with t-SNAREs homolog 1A	1.014	1.202	1.139	1.096	1.058
RS19_MOUSE	(Q9CZX8) 40S ribosomal protein S19	0.716	1.404	0.983	0.963	0.844
SERC_MOUSE	(Q99K85) Phosphoserine aminotransferase	0.916	0.866	1.077	1.034	1.007
BAG6_MOUSE	(Q9Z1R2) Large proline-rich protein BAG6	1.677	0.996	4.278	0.671	1.341
SYHC_MOUSE	(Q61035) Histidine--tRNA ligase, cytoplasmic	1.091	1.014	1.009	0.972	1.03
SYHM_MOUSE	(Q99KK9) Probable histidine--tRNA ligase, mitochondrial	1.077	1.02	0.994	0.978	1.063
ALBU_MOUSE	(P07724) Serum albumin	0.846	0.313	1.396	0.755	1.102
RS12_MOUSE	(P63323) 40S ribosomal protein S12	0.744	1.074	0.747	0.824	0.523
NFU1_MOUSE	(Q9QZ23) NFU1 iron-sulfur cluster scaffold homolog, mitochondrial	0.894	1	0.957	0.862	1.168
GLRX3_MOUSE	(Q9CQM9) Glutaredoxin-3	1.011	0.926	1.035	1.061	0.95
GDPD1_MOUSE	(Q9CRY7) Glycerophosphodiester phosphodiesterase domain-containing protein 1	0.696	0.982	0.672	0.808	0.568
MPPA_MOUSE	(Q9DC61) Mitochondrial-processing peptidase subunit alpha	1.073	1.197	1.032	1.011	1.308
PRS6A_MOUSE	(O88685) 26S protease regulatory subunit 6A	1.102	1.06	1.085	1.052	1.072
BIEA_MOUSE	(Q9CY64) Biliverdin reductase A	1.093	1.096	1.113	1.015	0.98
SNG3_MOUSE	Synaptogyrin-3 OS=Mus musculus GN=Syngr3 PE=1 SV=1	1.075	0.858	0.924	0.755	0.839
GOG7B_MOUSE	(Q9D428) Golgin subfamily A member 7B	1.002	0.84	0.95	0.931	0.845
CLCN7_MOUSE	(O70496) H(+)/Cl(-) exchange transporter 7	0.97	1.677	1.315	1.014	1.191
PSMD9_MOUSE	(Q9CR00) 26S proteasome non-ATPase regulatory subunit 9	0.943	1.011	1.063	1.003	0.952
RS7_MOUSE	(P62082) 40S ribosomal protein S7	1.064	1.139	1.311	1.046	2.025
LRC59_MOUSE	(Q922Q8) Leucine-rich repeat-containing protein 59	0.7	1.506	0.983	0.882	0.804
PRS10_MOUSE	(P62334) 26S protease regulatory subunit 10B	1.011	1.035	1.05	1.232	1.015
ARL8B_MOUSE	(Q9CQW2) ADP-ribosylation factor-like protein 8B	0.943	0.951	0.887	1.044	0.894
TYB4_MOUSE	Thymosin beta-4 OS=Mus musculus GN=Tmsb4x PE=1 SV=1	0.898	1	0.693	1.041	0.898
LPHN3_MOUSE	(Q80TS3) Latrophilin-3	1.05	1.034	0.967	0.93	0.911
PSA1_MOUSE	(Q9R1P4) Proteasome subunit alpha type-1	1.257	0.964	1.292	1.285	1.451
ISC2A_MOUSE	(P85094) Isochorismatase domain-containing protein 2A, mitochondrial	1.21	0.524	0.893	1.135	1.163
USO1_MOUSE	(Q9Z1Z0) General vesicular transport factor p115	0.865	1.104	0.892	0.993	0.836
BZW1_MOUSE	(Q9CQC6) Basic leucine zipper and W2 domain-containing protein 1	0.725	0.812	0.87	0.752	0.701
ACYP1_MOUSE	(P56376) Acylphosphatase-1	0.867	0.733	0.907	0.964	0.895
AEDO_MOUSE	(Q6PDY2) 2-aminoethanethiol dioxygenase	1.015	1.122	1.048	1.079	1.163
ODB2_MOUSE	(P53395) Lipoamide acyltransferase component of branched-chain alpha-keto acid dehydrogenase complex, mitochondrial	0.898	1.159	0.979	0.94	1.264
ALR_MOUSE	(P56213) FAD-linked sulfhydryl oxidase ALR	1.058	1.024	0.88	0.922	1.21
THOP1_MOUSE	(Q8C1A5) Thimet oligopeptidase	1.315	0.992	1.77	1.212	1.444
SCRN3_MOUSE	(Q3TMH2) Secernin-3	1.136	0.91	1.162	1.361	1.166
HPRT_MOUSE	(P00493) Hypoxanthine-guanine phosphoribosyltransferase	0.929	0.799	0.723	0.957	0.761
RL6_MOUSE	(P47911) 60S ribosomal protein L6	0.684	1.376	0.893	0.891	0.705
GAK_MOUSE	(Q99KY4) Cyclin-G-associated kinase	1.002	0.982	1.075	1.063	1.191
NED4L_MOUSE	(Q8CFI0) E3 ubiquitin-protein ligase NEDD4-like	0.934	1.125	1.118	0.993	1.076
TIM13_MOUSE	(P62075) Mitochondrial import inner membrane translocase subunit Tim13	0.925	1.097	0.687	0.937	1.013
RM14_MOUSE	(Q9D1I6) 39S ribosomal protein L14, mitochondrial	1.17	0.951	0.885	0.918	1.246
ICAM5_MOUSE	(Q60625) Intercellular adhesion molecule 5	1.015	1.051	0.911	1.117	0.945
DDB1_MOUSE	(Q3U1J4) DNA damage-binding protein 1	0.97	0.905	1.039	1.005	0.941
SYSM_MOUSE	(Q9JJL8) Serine--tRNA ligase, mitochondrial	0.914	0.718	1.084	0.939	1.295
CBLN1_MOUSE	(Q9R171) Cerebellin-1	1.257	1.033	1.405	1.046	1.084
AT8A2_MOUSE	(P98200) Probable phospholipid-transporting ATPase IB	1.08	1.002	1.048	0.964	0.752
SET_MOUSE	(Q9EQU5) Protein SET	0.825	0.973	0.875	0.929	0.706
PTPR2_MOUSE	(P80560) Receptor-type tyrosine-protein phosphatase N2	0.936	1.098	1.097	1.068	0.991
SCPDL_MOUSE	(Q8R127) Saccharopine dehydrogenase-like oxidoreductase	0.847	1	0.732	0.828	0.929
SNX30_MOUSE	(Q8CE50) Sorting nexin-30	1.035	0.985	1.165	1.041	2.49
CPNE4_MOUSE	(Q8BLR2) Copine-4	0.893	0.925	0.973	0.913	0.957
NCALD_MOUSE	(Q91X97) Neurocalcin-delta	0.976	0.833	0.975	0.922	1.069
PCYOX_MOUSE	(Q9CQF9) Prenylcysteine oxidase	0.907	1.096	1.184	0.991	0.911
CCD47_MOUSE	(Q9D024) Coiled-coil domain-containing protein 47	0.662	0.942	0.704	0.781	0.53
OST48_MOUSE	(O54734) Dolichyl-diphosphooligosaccharide--protein glycosyltransferase 48 kDa subunit	0.831	1.069	1.018	0.904	0.648
NDUV3_MOUSE	(Q8BK30) NADH dehydrogenase [ubiquinone] flavoprotein 3, mitochondrial	0.965	1.11	0.494	0.679	0.663
TBC24_MOUSE	(Q3UUG6) TBC1 domain family member 24	0.911	0.913	0.918	1.153	0.843
RL27_MOUSE	(P61358) 60S ribosomal protein L27	0.758	1.121	0.756	0.912	0.539
SPRY7_MOUSE	(Q3TFQ1) SPRY domain-containing protein 7	0.892	1	1.387	1.008	0.926
GCSP_MOUSE	(Q91W43) Glycine dehydrogenase [decarboxylating], mitochondrial	1.159	0.865	0.81	0.892	1.034
EIF3K_MOUSE	(Q9DBZ5) Eukaryotic translation initiation factor 3 subunit K	0.949	0.953	1.633	0.663	1.067
KAP1_MOUSE	(P12849) cAMP-dependent protein kinase type I-beta regulatory subunit	0.729	0.811	1.05	0.504	0.897
FSD1_MOUSE	(Q7TPM6) Fibronectin type III and SPRY domain-containing protein 1	1.004	0.906	1.008	0.988	0.804
TBRG4_MOUSE	(Q91YM4) Protein TBRG4	1.02	1.195	1.034	0.94	1.46
CUL5_MOUSE	(Q9D5V5) Cullin-5	1.085	0.989	1.145	1.175	1.066
IF2B_MOUSE	(Q99L45) Eukaryotic translation initiation factor 2 subunit 2	1.019	1.193	1.252	0.936	1.145
RS21_MOUSE	(Q9CQR2) 40S ribosomal protein S21	0.773	1.414	0.91	0.878	0.76
ARFG2_MOUSE	(Q99K28) ADP-ribosylation factor GTPase-activating protein 2	0.929	1.129	1.016	0.936	0.834
KTN1_MOUSE	(Q61595) Kinectin	0.851	1.289	0.787	0.973	0.829
SHAN2_MOUSE	(Q80Z38) SH3 and multiple ankyrin repeat domains protein 2	0.698	1.188	0.84	0.796	0.996
SL9A1_MOUSE	(Q61165) Sodium/hydrogen exchanger 1	1.228	1.287	0.886	0.819	0.858
DLG1_MOUSE	(Q811D0) Disks large homolog 1	0.966	0.951	1.042	0.964	1.37
PLCL1_MOUSE	(Q3USB7) Inactive phospholipase C-like protein 1	1.06	0.884	0.979	0.98	0.873
RL23_MOUSE	(P62830) 60S ribosomal protein L23	0.803	1.297	0.832	0.907	0.778
DJC11_MOUSE	(Q5U458) DnaJ homolog subfamily C member 11	0.865	0.837	0.609	0.513	1.281
NTRK2_MOUSE	(P15209) BDNF/NT-3 growth factors receptor	1.235	0.739	1.971	0.945	1.905
AKA12_MOUSE	(Q9WTQ5) A-kinase anchor protein 12	1.308	1.066	1.22	1.156	1.014
FAK2_MOUSE	(Q9QVP9) Protein-tyrosine kinase 2-beta	1.027	0.959	1.027	1.106	1.071
MOT1_MOUSE	(P53986) Monocarboxylate transporter 1	0.912	0.879	0.934	1.109	0.741
RINI_MOUSE	(Q91VI7) Ribonuclease inhibitor	1.081	1.266	1.117	1.239	1.327
ARSA_MOUSE	(P50428) Arylsulfatase A	0.716	1.107	0.849	0.782	0.755
UBL4A_MOUSE	(P21126) Ubiquitin-like protein 4A	0.973	1.054	1.221	1.002	1.112
SRC_MOUSE	(P05480) Neuronal proto-oncogene tyrosine-protein kinase Src	0.885	0.969	0.925	0.936	0.885
FYN_MOUSE	(P39688) Tyrosine-protein kinase Fyn	1.08	1.266	1.185	1.072	1.026
S10A6_MOUSE	(P14069) Protein S100-A6	1.069	0.883	0.93	0.791	1.067
ASNS_MOUSE	(Q61024) Asparagine synthetase [glutamine-hydrolyzing]	1.035	1.134	1.217	1.212	1.073
RGS10_MOUSE	(Q9CQE5) Regulator of G-protein signaling 10	1.133	0.962	0.863	1.048	1.18
TNPO1_MOUSE	(Q8BFY9) Transportin-1	0.76	0.704	1.018	0.691	2.501
ETBR2_MOUSE	(Q99JG2) Endothelin B receptor-like protein 2	1.313	1.269	2.447	1.194	1.834
CPLX1_MOUSE	(P63040) Complexin-1	0.956	0.93	0.811	1.037	0.933
PI3R4_MOUSE	(Q8VD65) Phosphoinositide 3-kinase regulatory subunit 4	1.023	1.209	1.105	1.249	1.095
STK39_MOUSE	(Q9Z1W9) STE20/SPS1-related proline-alanine-rich protein kinase	0.826	0.799	0.869	0.641	0.815
KKCC2_MOUSE	(Q8C078) Calcium/calmodulin-dependent protein kinase kinase 2	0.763	0.609	1.059	0.961	0.847
DC1I2_MOUSE	(O88487) Cytoplasmic dynein 1 intermediate chain 2	1.018	1.059	1.021	1.017	0.965
TMOD2_MOUSE	(Q9JKK7) Tropomodulin-2	0.902	1.093	1.037	1.071	0.99
EXOC3_MOUSE	(Q6KAR6) Exocyst complex component 3	1.063	1.502	1.123	1.205	1.114
RDH14_MOUSE	(Q9ERI6) Retinol dehydrogenase 14	1.141	1.021	0.969	1.043	1.051
IF5A1_MOUSE	(P63242) Eukaryotic translation initiation factor 5A-1	0.926	1.057	0.858	1.054	0.859
NIT2_MOUSE	(Q9JHW2) Omega-amidase NIT2	0.896	0.827	0.8	1.049	0.935
RAB21_MOUSE	(P35282) Ras-related protein Rab-21	1.055	1.079	1.247	1.203	0.927
IF2M_MOUSE	(Q91YJ5) Translation initiation factor IF-2, mitochondrial	0.745	0.82	0.685	0.603	0.762
ABCA2_MOUSE	(P41234) ATP-binding cassette sub-family A member 2	0.6	1.263	1.009	0.91	0.802
GATM_MOUSE	(Q9D964) Glycine amidinotransferase, mitochondrial	0.908	1.394	1.152	0.487	1.192
LMAN2_MOUSE	(Q9DBH5) Vesicular integral-membrane protein VIP36	0.853	1.188	1.098	1.096	1.362
SORCN_MOUSE	(Q6P069) Sorcin	0.897	1.568	0.989	0.916	0.897
EFHA2_MOUSE	(Q9CTY5) EF-hand domain-containing family member A2	0.878	1.41	1.684	0.694	3.043
F136A_MOUSE	(Q9CR98) Protein FAM136A	0.948	0.86	0.717	0.918	0.86
HINT1_MOUSE	(P70349) Histidine triad nucleotide-binding protein 1	0.94	1.036	1.131	0.996	1.066
GANAB_MOUSE	(Q8BHN3) Neutral alpha-glucosidase AB	1.173	1.176	1.132	0.888	0.993
RL37_MOUSE	(Q9D823) 60S ribosomal protein L37	1.26	2.241	1.722	1.38	1.18
NCLN_MOUSE	(Q8VCM8) Nicalin	0.723	1.267	0.931	0.862	0.702
FAAA_MOUSE	(P35505) Fumarylacetoacetase	1.027	0.85	0.948	1.085	0.984
LR16C_MOUSE	(Q3V3V9) Leucine-rich repeat-containing protein 16C	0.96	0.759	0.985	0.95	1.049
RL26_MOUSE	(P61255) 60S ribosomal protein L26	0.699	1.361	1.043	0.956	0.719
DAAM1_MOUSE	(Q8BPM0) Disheveled-associated activator of morphogenesis 1	0.931	0.94	1.071	0.983	0.993
TPPC4_MOUSE	(Q9ES56) Trafficking protein particle complex subunit 4	1.136	1.242	2.807	1.29	1.695
LZIC_MOUSE	(Q8K3C3) Protein LZIC	0.966	0.826	0.788	1.112	0.934
KAD2_MOUSE	(Q9WTP6) Adenylate kinase 2, mitochondrial	0.877	0.836	0.84	0.968	0.895
GRM2_MOUSE	(Q14BI2) Metabotropic glutamate receptor 2	0.967	0.821	1.455	0.91	1.023
SPG7_MOUSE	(Q3ULF4) Paraplegin	1.781	1.225	5.171	0.477	1.476
TBCB_MOUSE	(Q9D1E6) Tubulin-folding cofactor B	1.073	0.977	1.366	1.025	1.388
CMPK2_MOUSE	(Q3U5Q7) UMP-CMP kinase 2, mitochondrial	0.992	0.944	0.778	1.101	0.958
VPS45_MOUSE	(P97390) Vacuolar protein sorting-associated protein 45	1.084	1.136	1.325	1.103	1.045
KCNA4_MOUSE	(Q61423) Potassium voltage-gated channel subfamily A member 4	0.516	0.759	1.041	0.614	2.125
NEDD8_MOUSE	(P29595) NEDD8	1.067	0.91	0.939	1.067	0.936
SYVC_MOUSE	(Q9Z1Q9) Valine--tRNA ligase	0.744	1.104	0.938	1.052	0.848
EIF3G_MOUSE	(Q9Z1D1) Eukaryotic translation initiation factor 3 subunit G	0.727	1.094	0.912	0.876	0.921
DPM1_MOUSE	(O70152) Dolichol-phosphate mannosyltransferase	0.987	0.876	1.289	0.931	1.387
SE6L2_MOUSE	(Q4V9Z5) Seizure 6-like protein 2	1.01	1.226	0.996	0.874	0.992
RL13A_MOUSE	(P19253) 60S ribosomal protein L13a	0.876	1.343	1.274	0.898	0.895
SHLB1_MOUSE	(Q9JK48) Endophilin-B1	1.003	0.954	1.118	0.958	1.11
VP26B_MOUSE	(Q8C0E2) Vacuolar protein sorting-associated protein 26B	1.051	1.18	0.966	1.076	0.975
ICA69_MOUSE	(P97411) Islet cell autoantigen 1	1.116	0.812	1.11	1.142	1.018
CLPX_MOUSE	(Q9JHS4) ATP-dependent Clp protease ATP-binding subunit clpX-like, mitochondrial	0.974	0.872	0.796	0.914	0.999
RS3_MOUSE	(P62908) 40S ribosomal protein S3	0.828	1.205	0.935	0.923	0.834
ESTD_MOUSE	(Q9R0P3) S-formylglutathione hydrolase	0.852	1.376	0.785	0.808	0.701
PRRT2_MOUSE	(E9PUL5) Proline-rich transmembrane protein 2	0.993	0.949	1.152	1.003	0.961
MARK4_MOUSE	(Q8CIP4) MAP/microtubule affinity-regulating kinase 4	1.147	0.799	0.978	0.9	3.385
LIN7C_MOUSE	(O88952) Protein lin-7 homolog C	0.967	1.045	1.059	1.003	0.893
EF1A2_MOUSE	(P62631) Elongation factor 1-alpha 2	1.141	0.831	1.018	0.393	0.938
ELMO2_MOUSE	(Q8BHL5) Engulfment and cell motility protein 2	0.939	1.357	1.061	1.013	1.058
MARE2_MOUSE	(Q8R001) Microtubule-associated protein RP/EB family member 2	1.067	1.145	1.188	0.821	1.076
KPCA_MOUSE	(P20444) Protein kinase C alpha type	0.855	0.919	1.036	0.944	1.003
OXSR1_MOUSE	(Q6P9R2) Serine/threonine-protein kinase OSR1	1.685	1.645	3.826	0.836	3.604
ITM2B_MOUSE	(O89051) Integral membrane protein 2B	1.205	0.904	1.479	0.953	1.329
PSB6_MOUSE	(Q60692) Proteasome subunit beta type-6	1.119	0.867	1.139	0.834	1.269
VWA8_MOUSE	(Q8CC88) von Willebrand factor A domain-containing protein 8	1.067	0.938	0.877	0.996	1.14
SYLC_MOUSE	(Q8BMJ2) Leucine--tRNA ligase, cytoplasmic	1.276	1.176	1.107	1.322	1.008
RM01_MOUSE	(Q99N96) 39S ribosomal protein L1, mitochondrial	0.912	0.799	0.756	0.883	0.812
GLRX1_MOUSE	(Q9QUH0) Glutaredoxin-1	1.052	0.683	1.211	0.854	1.038
PADI2_MOUSE	(Q08642) Protein-arginine deiminase type-2	0.702	0.991	0.813	1.074	0.654
SYTC_MOUSE	(Q9D0R2) Threonine--tRNA ligase, cytoplasmic	0.936	0.971	0.939	0.947	0.89
AGM1_MOUSE	(Q9CYR6) Phosphoacetylglucosamine mutase	1.005	1.037	1.097	1.046	1.082
UBC12_MOUSE	(P61082) NEDD8-conjugating enzyme Ubc12	0.885	0.646	0.815	0.964	0.96
ARPC3_MOUSE	Actin-related protein 2/3 complex subunit 3 OS=Mus musculus GN=Arpc3 PE=1 SV=3	0.951	1.08	2.125	1.004	1.386
PRIO_MOUSE	(P04925) Major prion protein	0.966	0.991	1.091	0.879	0.818
MFN2_MOUSE	(Q80U63) Mitofusin-2	0.899	1.102	0.829	0.769	1.04
VCIP1_MOUSE	(Q8CDG3) Deubiquitinating protein VCIP135	0.865	0.839	0.887	0.956	1.022
RS14_MOUSE	(P62264) 40S ribosomal protein S14	1.036	1.395	1.143	1.023	1.135
IRK10_MOUSE	(Q9JM63) ATP-sensitive inward rectifier potassium channel 10	0.657	0.993	1.099	1.564	0.308
CMGA_MOUSE	(P26339) Chromogranin-A	0.866	1.077	0.98	0.978	0.699
KIF2A_MOUSE	(P28740) Kinesin-like protein KIF2A	1.016	1.138	1.087	1.075	1.251
RT4I1_MOUSE	Reticulon-4-interacting protein 1, mitochondrial OS=Mus musculus GN=Rtn4ip1 PE=1 SV=2	0.968	1.087	1.274	0.842	1.637
AN32A_MOUSE	(O35381) Acidic leucine-rich nuclear phosphoprotein 32 family member A	0.899	0.964	0.773	0.854	0.669
EIF3B_MOUSE	(Q8JZQ9) Eukaryotic translation initiation factor 3 subunit B	1.05	1.182	0.975	1.066	0.897
GNL1_MOUSE	(P36916) Guanine nucleotide-binding protein-like 1	1.244	1.083	1.54	0.841	2.405
EPDR1_MOUSE	(Q99M71) Mammalian ependymin-related protein 1	0.679	1.053	0.796	1.112	0.783
ADCY5_MOUSE	(P84309) Adenylate cyclase type 5	1.006	0.926	1.054	1.088	1.021
CBPD_MOUSE	(O89001) Carboxypeptidase D	0.808	0.985	1.002	0.852	0.758
MY18A_MOUSE	(Q9JMH9) Unconventional myosin-XVIIIa	1.117	0.963	0.822	0.786	0.978
HECW2_MOUSE	(Q6I6G8) E3 ubiquitin-protein ligase HECW2	1.08	0.697	2.458	0.724	2.19
MARH5_MOUSE	(Q3KNM2) E3 ubiquitin-protein ligase MARCH5	1.052	0.938	1.15	0.53	1.456
NMRL1_MOUSE	(Q8K2T1) NmrA-like family domain-containing protein 1	0.865	1.056	1.046	1.048	1.391
RGS19_MOUSE	Regulator of G-protein signaling 19 OS=Mus musculus GN=Rgs19 PE=2 SV=1	1.198	1.077	0.935	1.079	0.955
AMPD2_MOUSE	(Q9DBT5) AMP deaminase 2	1.084	1.058	1.155	1.057	1.1
KCND2_MOUSE	(Q9Z0V2) Potassium voltage-gated channel subfamily D member 2	0.913	1.065	0.872	1.036	0.693
G45IP_MOUSE	(Q9CR59) Growth arrest and DNA damage-inducible proteins-interacting protein 1	0.923	0.813	0.759	0.724	0.893
VPS11_MOUSE	(Q91W86) Vacuolar protein sorting-associated protein 11 homolog	1.336	1.986	1.246	1.558	1.433
CISD3_MOUSE	CDGSH iron-sulfur domain-containing protein 3, mitochondrial OS=Mus musculus GN=Cisd3 PE=2 SV=1	1.134	1.015	1.022	0.848	1.694
PSD3_MOUSE	(Q2PFD7) PH and SEC7 domain-containing protein 3	1.018	0.912	0.901	1.044	0.84
MK09_MOUSE	(Q9WTU6) Mitogen-activated protein kinase 9	1.093	0.98	1.015	0.963	1.001
UBE3A_MOUSE	(O08759) Ubiquitin-protein ligase E3A	1.08	0.956	1.2	1.006	1.911
RT24_MOUSE	(Q9CQV5) 28S ribosomal protein S24, mitochondrial	0.986	1.13	0.901	1.002	1.164
S4A4_MOUSE	(O88343) Electrogenic sodium bicarbonate cotransporter 1	1.087	1.009	1.666	2.024	0.759
RL10A_MOUSE	(P53026) 60S ribosomal protein L10a	0.748	1.25	0.976	0.972	0.657
IF6_MOUSE	(O55135) Eukaryotic translation initiation factor 6	1.034	1.271	1.911	0.638	4.207
RL8_MOUSE	60S ribosomal protein L8 OS=Mus musculus GN=Rpl8 PE=2 SV=2	0.704	1.416	1.118	0.954	0.654
MTMR2_MOUSE	(Q9Z2D1) Myotubularin-related protein 2	1.083	1.043	1.141	1.013	1.159
PPIF_MOUSE	(Q99KR7) Peptidyl-prolyl cis-trans isomerase F, mitochondrial	1.178	0.931	1.076	0.861	1.152
GPM6A_MOUSE	(P35802) Neuronal membrane glycoprotein M6-a	1.335	1.268	1.187	1.046	0.986
APOA1_MOUSE	(Q00623) Apolipoprotein A-I	0.873	1.063	1.274	1.261	1.08
FXYD6_MOUSE	(Q9D164) FXYD domain-containing ion transport regulator 6	1.112	1.01	0.947	1.003	0.863
FGF12_MOUSE	Fibroblast growth factor 12 OS=Mus musculus GN=Fgf12 PE=2 SV=1	0.773	0.856	0.894	0.877	0.813
EI3JA_MOUSE	(Q3UGC7) Eukaryotic translation initiation factor 3 subunit J-A	1.127	1.235	0.915	1.13	0.957
S6A11_MOUSE	(P31650) Sodium- and chloride-dependent GABA transporter 3	0.9	0.954	1.312	1.426	0.662
PHAR1_MOUSE	(Q2M3X8) Phosphatase and actin regulator 1	1.062	0.997	1.065	0.97	1.194
CCD22_MOUSE	(Q9JIG7) Coiled-coil domain-containing protein 22	1.025	1.162	2.185	1.151	2.137
GNS_MOUSE	(Q8BFR4) N-acetylglucosamine-6-sulfatase	0.811	1.068	0.782	0.78	0.717
TIM50_MOUSE	(Q9D880) Mitochondrial import inner membrane translocase subunit TIM50	0.825	1.323	0.784	0.882	0.89
NDUF4_MOUSE	(Q9D1H6) NADH dehydrogenase [ubiquinone] 1 alpha subcomplex assembly factor 4	0.881	0.867	0.782	1.065	1.083
PREP_MOUSE	(Q8K411) Presequence protease, mitochondrial	0.891	0.974	0.828	1.031	1.164
IDH3A_MOUSE	(Q9D6R2) Isocitrate dehydrogenase [NAD] subunit alpha, mitochondrial	1.043	0.909	0.844	0.88	0.995
FIBG_MOUSE	(Q8VCM7) Fibrinogen gamma chain	0.796	1.378	3.327	1.993	2.702
AT1B1_MOUSE	(P14094) Sodium/potassium-transporting ATPase subunit beta-1	1.183	0.981	0.771	1.365	0.74
APLP1_MOUSE	(Q03157) Amyloid-like protein 1	0.784	0.846	0.827	0.945	0.687
CHM4B_MOUSE	(Q9D8B3) Charged multivesicular body protein 4b	1.072	0.823	0.949	1.091	0.708
AT5G1_MOUSE	ATP synthase lipid-binding protein, mitochondrial OS=Mus musculus GN=Atp5g1 PE=2 SV=1	1.614	0.831	1.35	1.724	1.513
RT06_MOUSE	(P58064) 28S ribosomal protein S6, mitochondrial	0.957	1.087	0.877	0.846	1.105
CROCC_MOUSE	(Q8CJ40) Rootletin	1.03	1.1	0.856	0.838	1.295
SNX18_MOUSE	(Q91ZR2) Sorting nexin-18	1.025	1.088	0.88	0.796	0.782
ADX_MOUSE	(P46656) Adrenodoxin, mitochondrial	1.191	0.985	1.186	1.021	1.333
TOM1_MOUSE	(O88746) Target of Myb protein 1	0.859	1.06	1.527	0.755	0.918
KPRB_MOUSE	(Q8R574) Phosphoribosyl pyrophosphate synthase-associated protein 2	1.269	1.022	1.503	0.965	1.124
SND1_MOUSE	(Q78PY7) Staphylococcal nuclease domain-containing protein 1	0.786	1.442	1.06	0.871	0.711
MYL6_MOUSE	(Q60605) Myosin light polypeptide 6	0.945	0.816	0.856	0.891	1.131
LONF3_MOUSE	(Q9D4H7) LON peptidase N-terminal domain and RING finger protein 3	0.899	0.959	1.111	0.906	1.101
PSMD2_MOUSE	(Q8VDM4) 26S proteasome non-ATPase regulatory subunit 2	0.965	0.813	0.97	0.941	1.056
XPP3_MOUSE	Probable Xaa-Pro aminopeptidase 3 OS=Mus musculus GN=Xpnpep3 PE=2 SV=1	1.035	1.066	0.978	0.992	1.299
DCTN3_MOUSE	(Q9Z0Y1) Dynactin subunit 3	1.018	1.071	1.194	1.062	1.025
T22D4_MOUSE	TSC22 domain family protein 4 OS=Mus musculus GN=Tsc22d4 PE=2 SV=2	1.139	0.811	0.803	1.011	0.842
SRGP2_MOUSE	(Q91Z67) SLIT-ROBO Rho GTPase-activating protein 2	1.009	1.125	1.128	1.022	1.036
PLCB3_MOUSE	(P51432) 1-phosphatidylinositol 4,5-bisphosphate phosphodiesterase beta-3	0.958	0.795	0.749	0.827	0.885
DPM3_MOUSE	(Q9D1Q4) Dolichol-phosphate mannosyltransferase subunit 3	1.071	1.404	1.134	1.227	1.03
RHG26_MOUSE	(Q6ZQ82) Rho GTPase-activating protein 26	1.031	1.204	1.747	0.9	1.716
GNAI3_MOUSE	(Q9DC51) Guanine nucleotide-binding protein G(k) subunit alpha	0.973	0.95	1.007	0.947	0.81
PLPL8_MOUSE	(Q8K1N1) Calcium-independent phospholipase A2-gamma	0.948	1.15	1.205	0.983	1.207
TRIM9_MOUSE	(Q8C7M3) E3 ubiquitin-protein ligase TRIM9	0.948	1.033	0.962	0.823	1.116
RL23A_MOUSE	(P62751) 60S ribosomal protein L23a	0.714	1.103	0.814	0.982	0.751
UBP8_MOUSE	(Q80U87) Ubiquitin carboxyl-terminal hydrolase 8	0.943	1.089	1.044	0.989	1.001
ULA1_MOUSE	(Q8VBW6) NEDD8-activating enzyme E1 regulatory subunit	1.072	0.911	0.895	0.991	0.82
CYBP_MOUSE	(Q9CXW3) Calcyclin-binding protein	1.097	1.068	0.892	1.206	0.894
UCHL5_MOUSE	(Q9WUP7) Ubiquitin carboxyl-terminal hydrolase isozyme L5	1.068	1.051	1.124	0.871	1.077
PLXB1_MOUSE	(Q8CJH3) Plexin-B1	1.009	0.83	1.038	0.978	1.001
PTMS_MOUSE	(Q9D0J8) Parathymosin	0.899	0.933	0.932	0.888	0.898
IF4B_MOUSE	(Q8BGD9) Eukaryotic translation initiation factor 4B	1.013	0.96	0.955	0.976	0.9
EMC2_MOUSE	(Q9CRD2) ER membrane protein complex subunit 2	1.076	0.937	5.214	1.635	3.253
IRK9_MOUSE	(P48543) G protein-activated inward rectifier potassium channel 3	0.9	0.777	0.704	0.937	0.902
FA63B_MOUSE	(Q6PDI6) Protein FAM63B	1.035	0.863	1.087	1.054	0.99
K1467_MOUSE	(Q8BYI8) Uncharacterized protein KIAA1467	0.815	1.009	0.863	0.835	1.242
REEP5_MOUSE	(Q60870) Receptor expression-enhancing protein 5	0.961	0.739	0.835	1.027	0.925
PSMD6_MOUSE	(Q99JI4) 26S proteasome non-ATPase regulatory subunit 6	0.93	0.758	0.909	0.893	0.952
RM40_MOUSE	(Q9Z2Q5) 39S ribosomal protein L40, mitochondrial	1.408	1.749	2.697	1.44	3.065
CNTN2_MOUSE	(Q61330) Contactin-2	0.892	0.795	1.112	0.905	1.346
SPB6_MOUSE	(Q60854) Serpin B6	1.061	0.839	0.889	1.067	0.872
PHIPL_MOUSE	(Q8BGT8) Phytanoyl-CoA hydroxylase-interacting protein-like	1.056	1.045	0.868	1.056	0.847
RL28_MOUSE	(P41105) 60S ribosomal protein L28	0.923	2.006	0.57	1.247	0.567
NUDC3_MOUSE	(Q8R1N4) NudC domain-containing protein 3	1.614	1.362	1.791	0.916	2.599
ENAH_MOUSE	(Q03173) Protein enabled homolog	0.977	1.035	1.124	1.015	1.027
CYTB_MOUSE	Cystatin-B OS=Mus musculus GN=Cstb PE=1 SV=1	1.31	1.447	1.153	1.092	0.982
SAC1_MOUSE	(Q9EP69) Phosphatidylinositide phosphatase SAC1	1.032	1.345	1.209	1.284	1.058
CKAP5_MOUSE	(A2AGT5) Cytoskeleton-associated protein 5	1.034	0.761	0.885	1.155	1.013
PLCG1_MOUSE	(Q62077) 1-phosphatidylinositol 4,5-bisphosphate phosphodiesterase gamma-1	1.098	1.703	1.35	1.279	1.431
SYTL4_MOUSE	(Q9R0Q1) Synaptotagmin-like protein 4	0.973	0.95	0.78	0.802	1.028
K22E_MOUSE	(Q3TTY5) Keratin, type II cytoskeletal 2 epidermal	1.062	0.3	0.914	0.929	0.862
GHITM_MOUSE	(Q91VC9) Growth hormone-inducible transmembrane protein	1.487	1.049	0.956	1.068	1.045
NDUB3_MOUSE	NADH dehydrogenase [ubiquinone] 1 beta subcomplex subunit 3 OS=Mus musculus GN=Ndufb3 PE=1 SV=1	1.001	1.013	0.638	0.571	0.855
GRM5_MOUSE	(Q3UVX5) Metabotropic glutamate receptor 5	1.197	1.275	1.664	0.838	1.646
DOC10_MOUSE	(Q8BZN6) Dedicator of cytokinesis protein 10	0.984	1.028	1.374	1.667	0.728

## Sheet: Analysis
Accession	Description	LOG2_WT/WT_205	LOG2_WT/D257A_237	LOG2_WT/WT_239	LOG2_WT/WT_246	LOG2_Mutator_211	LOG2_Mutator_217	LOG2_Mutator_249	LOG2_Mutator_207	LOG2_Mutator_236	LOG2_Mutator_240	LOG2_Mutator_248	pval	padj	Fold_Change	Respiratory Chain
NDUS4_MOUSE	(Q9CXZ1) NADH dehydrogenase [ubiquinone] iron-sulfur protein 4, mitochondrial	-0.104697	0.0799754	-0.0969617	-0.0985055	-0.734563	-0.870387	-0.413115	-0.547932	-0.510457	-0.500218	-0.664288	4.41e-05	0.0265767	-0.550804	TRUE
COX2_MOUSE	(P00405) Cytochrome c oxidase subunit 2	0.00144197	-0.0484122	-0.139236	0.151859	-1.01159	-1.1078	-0.494109	-0.614845	-0.899695	-0.577767	-0.761213	5.01e-05	0.0265767	-0.772416	TRUE
NDUC2_MOUSE	NADH dehydrogenase [ubiquinone] 1 subunit C2 OS=Mus musculus GN=Ndufc2 PE=1 SV=1	-0.12658	0.0114956	0.051024	-0.0262051	-0.698998	-0.823677	-0.26708	-0.456009	-0.492079	-0.533242	-0.720232	0.000109218	0.0385904	-0.547622	TRUE
AP2A1_MOUSE	(P17426) AP-2 complex subunit alpha-1	0.0214797	-0.011588	0.0100637	-0.011588	0.109695	0.149259	0.141433	0.112367	0.261832	0.123004	0.222805	0.000221664	0.0545421	0.157964	FALSE
NDUA4_MOUSE	(Q62425) NADH dehydrogenase [ubiquinone] 1 alpha subcomplex subunit 4	-0.00144342	-0.210897	-0.114035	0.190299	-1.18771	-0.92139	-0.463947	-0.678072	-0.833927	-0.608232	-0.862496	0.000257274	0.0545421	-0.759663	TRUE
NDUS7_MOUSE	(Q9DC70) NADH dehydrogenase [ubiquinone] iron-sulfur protein 7, mitochondrial	-0.0513992	-0.018878	0.0745054	0.128293	-0.486004	-0.724993	-0.0892673	-0.295128	-0.403542	-0.401635	-0.554273	0.00059673	0.0968361	-0.455251	TRUE
NDUA9_MOUSE	(Q9DC69) NADH dehydrogenase [ubiquinone] 1 alpha subcomplex subunit 9, mitochondrial	0	0.0690147	-0.128156	0.0384362	-0.818579	-0.664288	-0.332789	-0.394032	-0.37146	-0.258425	-0.386468	0.000639484	0.0968361	-0.455687	TRUE
NDUB7_MOUSE	(Q9CR61) NADH dehydrogenase [ubiquinone] 1 beta subcomplex subunit 7	-0.0985055	-0.139236	0.0299829	0.124328	-0.619271	-0.411195	-0.236164	-0.535332	-0.369595	-0.37707	-0.698998	0.000838765	0.111017	-0.443089	TRUE
NDUS8_MOUSE	(Q8K3J1) NADH dehydrogenase [ubiquinone] iron-sulfur protein 8, mitochondrial	-0.189351	-0.189351	-0.0892673	-0.205896	-0.926865	-0.751465	-0.432455	-0.634867	-0.465938	-0.33825	-0.58208	0.0010681	0.111017	-0.421808	TRUE
NDUBA_MOUSE	(Q9DCS9) NADH dehydrogenase [ubiquinone] 1 beta subcomplex subunit 10	0.109695	0.157044	0.0482362	0.132248	-0.367732	-0.584241	-0.0588937	-0.100051	-0.184425	-0.261881	-0.436354	0.00107453	0.111017	-0.396602	TRUE
NDUV2_MOUSE	(Q9D6J6) NADH dehydrogenase [ubiquinone] flavoprotein 2, mitochondrial	0.0172093	-0.153607	-0.125006	-0.177882	-0.72261	-0.77596	-0.332789	-0.351074	-0.365871	-0.390245	-0.590745	0.00115207	0.111017	-0.394364	TRUE
CRYM_MOUSE	(O54983) Thiomorpholine-carboxylate dehydrogenase	0.0214797	0.0243197	0.109695	0.0200577	0.202888	0.0676387	0.264236	0.316146	0.286881	0.147958	0.296311	0.0016241	0.137618	0.18212	FALSE
NDUS3_MOUSE	(Q9DCT2) NADH dehydrogenase [ubiquinone] iron-sulfur protein 3, mitochondrial	-0.152003	-0.093879	-0.00288828	0.0229004	-0.606035	-0.621488	-0.125006	-0.571322	-0.300448	-0.281036	-0.597278	0.00180919	0.137618	-0.386763	TRUE
GSTM1_MOUSE	(P10649) Glutathione S-transferase Mu 1	0.045443	0.0370307	0.0496308	0.0086303	0.0867838	0.290424	0.248535	0.296311	0.503858	0.495695	0.488515	0.00190976	0.137618	0.309119	FALSE
KCRB_MOUSE	(Q04447) Creatine kinase B-type	0.108357	0.0758749	0.164786	0.0827026	-0.0588937	-0.0335695	-0.0218044	0.0384362	0.0703893	-0.0649175	-0.103147	0.00208629	0.137618	-0.132717	FALSE
NDUAD_MOUSE	(Q9ERS2) NADH dehydrogenase [ubiquinone] 1 alpha subcomplex subunit 13	-0.0380063	-0.0394883	-0.153607	-0.327348	-0.808437	-0.715486	-0.518701	-0.448115	-0.384584	-0.436354	-0.60165	0.00219967	0.137618	-0.419434	TRUE
NDUS1_MOUSE	(Q91VD9) NADH-ubiquinone oxidoreductase 75 kDa subunit, mitochondrial	0.00288251	0.0496308	-0.077041	-0.0335695	-0.562772	-0.720232	-0.128156	-0.343732	-0.26708	-0.248108	-0.461959	0.00220709	0.137618	-0.375767	TRUE
NDUB3_MOUSE	NADH dehydrogenase [ubiquinone] 1 beta subcomplex subunit 3 OS=Mus musculus GN=Ndufb3 PE=1 SV=1	-0.336428	-0.321928	0.00144197	0.0186342	-0.648372	-0.808437	-0.226004	-0.937878	-1	-0.870387	-0.888969	0.00236425	0.139228	-0.609008	TRUE
NDUS5_MOUSE	(Q99LY9) NADH dehydrogenase [ubiquinone] iron-sulfur protein 5	0.0621217	0.109695	0.051024	0.444667	-0.800877	-0.666576	-0.33825	-0.207561	-0.473931	0.0114956	-0.461959	0.00259643	0.140241	-0.586543	TRUE
NDUBB_MOUSE	(O09111) NADH dehydrogenase [ubiquinone] 1 beta subcomplex subunit 11, mitochondrial	-0.07552	-0.232769	-0.00868224	-0.0320936	-0.415037	-0.450084	-0.21927	-0.808437	-0.349235	-0.401635	-0.409278	0.00264606	0.140241	-0.348873	TRUE
DCTN1_MOUSE	(O08788) Dynactin subunit 1	-0.00578235	-0.0101344	-0.0335695	-0.0800879	0.145351	0.0867838	0.00144197	0.077243	0.116365	0.0129262	0.0731347	0.00302557	0.152719	0.105714	FALSE
NDUS2_MOUSE	(Q91WD5) NADH dehydrogenase [ubiquinone] iron-sulfur protein 2, mitochondrial	-0.0306192	0.266637	0.404903	0.0813396	-0.516636	-0.72738	-0.195946	-0.172994	-0.254978	-0.254978	-0.37146	0.00379207	0.182709	-0.536904	TRUE
FAS_MOUSE	(P19096) Fatty acid synthase	-0.00723157	-0.0232698	-0.00144342	0.00432161	-0.0174171	-0.077041	-0.112475	-0.153607	-0.0306192	-0.147202	-0.171368	0.00590543	0.267913	-0.0944841	FALSE
COX41_MOUSE	(P19783) Cytochrome c oxidase subunit 4 isoform 1, mitochondrial	-0.0454314	0.0129262	-0.628162	0.38405	-1.32916	-1.38458	-1.152	-1.34008	-1.46196	-0.696658	-1.20756	0.00606595	0.267913	-1.15542	FALSE
NDUV3_MOUSE	(Q8BK30) NADH dehydrogenase [ubiquinone] flavoprotein 3, mitochondrial	-0.295128	-0.013043	-0.0513992	0.15056	-1.01742	-0.558517	-0.592919	-0.531156	-0.456009	-0.14401	-0.432455	0.00682006	0.289171	-0.480959	TRUE
NU4M_MOUSE	NADH-ubiquinone oxidoreductase chain 4 OS=Mus musculus GN=Mtnd4 PE=1 SV=1	-0.202572	0.0370307	0.00432161	0.0370307	-0.558517	-1.03801	0.0285692	-0.380822	-0.828793	-0.384584	-0.641604	0.00711409	0.290036	-0.512347	TRUE
AK1A1_MOUSE	(Q9JII6) Alcohol dehydrogenase [NADP(+)]	0.0908534	0.0840643	0.0676387	-0.109359	0.366252	0.185232	0.289244	0.41684	0.306845	0.0867838	0.205393	0.00786789	0.298488	0.231928	FALSE
NDUB6_MOUSE	(Q3UIU2) NADH dehydrogenase [ubiquinone] 1 beta subcomplex subunit 6	-0.0424568	0.195348	-0.115597	0.353888	-0.597278	-0.696658	-0.125006	-0.424688	-0.384584	-0.231075	-0.486004	0.0078846	0.298488	-0.518551	TRUE
TOM34_MOUSE	(Q9CYG7) Mitochondrial import receptor subunit TOM34	-0.106249	0.0717627	0.041243	0.128293	-0.0649175	-0.321928	-0.307573	-0.296899	-0.106249	-0.114035	-0.212568	0.00831941	0.304089	-0.237215	FALSE
AP2A2_MOUSE	(P17427) AP-2 complex subunit alpha-2	0.0440443	-0.0159576	-0.0499049	-0.123434	0.0229004	0.0717627	0.051024	0.129613	0.284514	0.144046	0.221568	0.00953337	0.322213	0.168517	FALSE
AP1B1_MOUSE	(O35643) AP-1 complex subunit beta-1	0.126973	0.045443	0.105678	0.0229004	0.136191	0.332278	0.126973	0.319618	0.214125	0.112367	0.275007	0.00954127	0.322213	0.141403	FALSE
SAHH3_MOUSE	(Q68FL4) Putative adenosylhomocysteinase 3	0.119024	0.0922074	0.133564	0.129613	0.194087	-0.204233	-0.318326	-0.0350469	-0.172994	-0.316528	-0.0816138	0.0097272	0.322213	-0.252124	FALSE
WDR37_MOUSE	(Q8CBE3) WD repeat-containing protein 37	-0.00433459	-0.0877334	-0.0679388	-0.128156	0.0129262	0.0662614	-0.0291463	0.0976108	-0.00144342	0.0538064	0.0827026	0.0120151	0.38594	0.112429	FALSE
PYGM_MOUSE	(Q9WUB3) Glycogen phosphorylase, muscle form	-0.118727	-0.00144342	0.00575927	0.0100637	0.108357	0.21661	-0.103147	0.240009	0.389567	0.136191	0.22033	0.0144994	0.447365	0.198646	FALSE
PLPP_MOUSE	(P60487) Pyridoxal phosphate phosphatase	-0.0203404	-0.277534	0	-0.131313	0.199123	0.151859	0.352759	0.0935602	0.130931	0.0989585	0.10165	0.0147715	0.447365	0.26856	FALSE
FAK2_MOUSE	(Q9QVP9) Protein-tyrosine kinase 2-beta	0.0426443	-0.0709665	0.0384362	-0.0603973	0.0384362	0.145351	0.0989585	-0.00868224	0.136191	0.283329	0.255803	0.0169455	0.480959	0.148198	FALSE
G6PI_MOUSE	(P06745) Glucose-6-phosphate isomerase	-0.118727	-0.0603973	0.0648829	-0.0528949	0.0342157	0.0894982	0.0840643	0.0635029	0.219091	0.132248	0.16092	0.0173913	0.480959	0.153718	FALSE
1433E_MOUSE	(P62259) 14-3-3 protein epsilon	0.0690147	0.00432161	0.0551957	-0.0985055	0.169925	0.153157	0.0186342	0.290424	0.288063	0.1137	0.126973	0.0175854	0.480959	0.158333	FALSE
VAMP2_MOUSE	(P63044) Vesicle-associated membrane protein 2	0.0114956	0.0731347	0.0840643	-0.152003	0.144046	0.137504	0.414677	0.328836	0.353888	0.119024	0.0854247	0.0185738	0.480959	0.222027	FALSE
ACTY_MOUSE	(Q8R5C5) Beta-centractin	-0.121863	0.0243197	-0.0159576	-0.0380063	0.280956	0.153157	-0.00144342	0.125651	0.0229004	0.0398403	0.0731347	0.0194327	0.480959	0.137048	FALSE
ODO2_MOUSE	(Q9D2G2) Dihydrolipoyllysine-residue succinyltransferase component of 2-oxoglutarate dehydrogenase complex, mitochondrial	-0.0174171	0.0676387	-0.00288828	0.00432161	-0.140826	-0.163268	0.0690147	-0.195946	0	-0.177882	-0.226004	0.0199979	0.480959	-0.132187	FALSE
ANXA6_MOUSE	(P14824) Annexin A6	0.0799754	0.0285692	-0.100051	-0.0291463	-0.199255	-0.0892673	-0.300448	-0.00578235	-0.21424	-0.161653	-0.140826	0.0205772	0.480959	-0.153619	FALSE
PRDX2_MOUSE	(Q61171) Peroxiredoxin-2	-0.101598	-0.0694519	-0.0724828	-0.0232698	0.0271541	-0.0740006	-0.013043	0.109695	0.0840643	-0.0484122	0.0398403	0.0206889	0.480959	0.0846003	FALSE
CLYBL_MOUSE	(Q8R4N0) Citrate lyase subunit beta-like protein, mitochondrial	0.0200577	0.0440443	0.00144197	-0.00144342	0.041243	0.151859	0.352759	0.298658	0.364012	0.0440443	0.0635029	0.0208428	0.480959	0.171986	FALSE
VAMP1_MOUSE	(Q62442) Vesicle-associated membrane protein 1	0.0524159	0.166073	0.0676387	0.0440443	0.221568	0.199123	0.381837	0.399445	0.395063	0.0827026	0.0867838	0.0211596	0.480959	0.169817	FALSE
QCR7_MOUSE	(Q9D855) Cytochrome b-c1 complex subunit 7	-0.0159576	0.177599	-0.0454314	0.243669	-0.490051	-0.347399	-0.152003	-0.274041	-0.145605	0.119024	-0.115597	0.0212184	0.480959	-0.29078	TRUE
AMPL_MOUSE	(Q9CPY7) Cytosol aminopeptidase	-0.00433459	0.191563	0.155749	0.130931	-0.0499049	-0.199255	0.0299829	-0.0335695	0.154454	-0.142417	-0.236164	0.0217167	0.480959	-0.186602	FALSE
KAP2_MOUSE	(P12367) cAMP-dependent protein kinase type II-alpha regulatory subunit	0.0172093	-0.0409718	-0.0409718	-0.224317	0.727703	0.015783	0.387363	0.798258	0.0342157	0.115033	0.123004	0.0217793	0.480959	0.386743	FALSE
NCDN_MOUSE	(Q9Z0E0) Neurochondrin	-0.0513992	-0.0634092	-0.0724828	-0.0985055	0.0328061	0.0100637	-0.118727	0.211635	0.14274	0.0579701	0.00432161	0.0236079	0.510703	0.120136	FALSE
ACSF2_MOUSE	(Q8VCW8) Acyl-CoA synthetase family member 2, mitochondrial	-0.16004	-0.0740006	-0.046921	-0.134477	0.10165	0.340277	0.318461	0.0129262	0.37629	-0.0985055	-0.118727	0.0252309	0.52896	0.237056	FALSE
MYH10_MOUSE	(Q61879) Myosin-10	0.0285692	0.0989585	0.0731347	0.0976108	0.108357	0.0908534	0.331132	0.171207	0.157044	0.149259	0.153157	0.02545	0.52896	0.0912902	FALSE
VATA_MOUSE	(P50516) V-type proton ATPase catalytic subunit A	0.0731347	-0.123434	0.0214797	-0.168123	-0.00578235	0.202888	0.202888	0.105678	0.232661	0.196607	0.168642	0.0262756	0.53095	0.20689	FALSE
AL1L1_MOUSE	(Q8R0Y6) Cytosolic 10-formyltetrahydrofolate dehydrogenase	-0.0634092	-0.0588937	0.0129262	-0.15682	0.0328061	-0.0619024	0.140124	0.0129262	0.115033	0.125651	0.0482362	0.0269089	0.53095	0.125531	FALSE
ENOA_MOUSE	(P17182) Alpha-enolase	-0.0785637	-0.128156	-0.0439433	-0.2567	-0.0528949	0.0690147	0.00575927	-0.104697	0.284514	0.0524159	0.0949116	0.0284952	0.53095	0.176701	FALSE
COX5B_MOUSE	(P19536) Cytochrome c oxidase subunit 5B, mitochondrial	-0.147202	-0.121863	-0.093879	0.604071	-0.736966	-0.490051	-0.354759	-0.880976	-0.715486	-0.332789	-0.621488	0.0286879	0.53095	-0.650641	FALSE
SUCB2_MOUSE	(Q9Z2I8) Succinyl-CoA ligase [GDP-forming] subunit beta, mitochondrial	-0.0409718	0.0962619	0.112367	-0.128156	0.259423	0.305679	0.543991	0.125651	0.370722	0.207893	-0.0619024	0.0287809	0.53095	0.240333	FALSE
AP2B1_MOUSE	(Q9DBG3) AP-2 complex subunit beta	0.0635029	0.015783	0.141433	-0.0262051	0.0468403	0.27739	0.0935602	0.24123	0.226509	0.126973	0.250962	0.0295702	0.53095	0.131866	FALSE
SYAC_MOUSE	(Q8BGQ7) Alanine--tRNA ligase, cytoplasmic	0.0881416	0.111031	0.0717627	0.0908534	0.302173	0.149259	0.177599	0.316146	0.172488	0.0935602	0.0949116	0.0303092	0.53095	0.0961436	FALSE
DC1I2_MOUSE	(O88487) Cytoplasmic dynein 1 intermediate chain 2	0.0100637	0.0827026	0.0257376	0.0827026	0.0299829	0.0243197	-0.0513992	-0.00433459	-0.0649175	-0.0543923	0.0086303	0.0306129	0.53095	-0.0663174	FALSE
SNP25_MOUSE	(P60879) Synaptosomal-associated protein 25	0.100305	0.0690147	-0.00578235	0.0299829	0.137504	0.153157	0.0908534	0.0758749	0.151859	0.164786	0.117695	0.0311408	0.53095	0.0790098	FALSE
GDAP1_MOUSE	(O88741) Ganglioside-induced differentiation-associated protein 1	-0.0439433	-0.134477	-0.0603973	0.00144197	-0.309359	-0.311148	0.0186342	-0.086201	-0.190997	-0.249822	-0.263612	0.0313078	0.53095	-0.139585	FALSE
CA198_MOUSE	(Q8C3W1) Uncharacterized protein C1orf198 homolog	-0.270556	-0.356606	-0.103147	-0.21424	-0.093879	-0.179515	0.339137	-0.100051	0.00575927	-0.0709665	-0.0649175	0.031334	0.53095	0.212647	FALSE
E41L3_MOUSE	(Q9WV92) Band 4.1-like protein 3	0.0071955	-0.128156	0.0143553	-0.136062	0.100305	0.201634	-0.0969617	0.0524159	0.108357	0.172488	0.0621217	0.031659	0.53095	0.146432	FALSE
IDHP_MOUSE	(P54071) Isocitrate dehydrogenase [NADP], mitochondrial	-0.07552	0.157044	0.0398403	-0.200913	0.0935602	0.119024	0.402722	0.124328	0.447844	0.344828	0.159629	0.0324764	0.53095	0.261592	FALSE
QCR1_MOUSE	(Q9CZ13) Cytochrome b-c1 complex subunit 1, mitochondrial	-0.129734	-0.0439433	-0.163268	0.0285692	-0.307573	-0.448115	-0.0528949	-0.186065	-0.258425	-0.14401	-0.296899	0.0330721	0.53095	-0.164903	TRUE
CAND1_MOUSE	(Q6ZQ38) Cullin-associated NEDD8-dissociated protein 1	-0.0816138	0.0370307	-0.00433459	-0.0424568	0.15056	-0.00578235	-0.0159576	0.0648829	0.107018	0.0524159	0.119024	0.0332227	0.53095	0.0902952	FALSE
PEBP1_MOUSE	(P70296) Phosphatidylethanolamine-binding protein 1	-0.0424568	-0.0439433	-0.018878	-0.104697	-0.360305	-0.304006	-0.231075	-0.263612	-0.0785637	-0.027675	-0.0649175	0.0335601	0.53095	-0.137528	FALSE
VATC1_MOUSE	(Q9Z1G3) V-type proton ATPase subunit C 1	0.109695	0.117695	0.0114956	0.0257376	0.104337	0.105678	0.0648829	0.298658	0.24123	0.244887	0.159629	0.0348198	0.534543	0.10803	FALSE
LR16C_MOUSE	(Q3V3V9) Leucine-rich repeat-containing protein 16C	-0.311148	-0.531156	-0.0588937	-0.397828	-0.0218044	-0.0740006	0.0690147	0.0271541	-0.210897	-0.0262051	0.249749	0.0359792	0.534543	0.326615	FALSE
KTN1_MOUSE	(Q61595) Kinectin	0.107018	0.102994	-0.232769	0.366252	-0.345564	-0.0394883	-0.270556	-0.260152	-0.687335	-0.386468	-0.209228	0.0365971	0.534543	-0.399987	FALSE
EPS15_MOUSE	(P42567) Epidermal growth factor receptor substrate 15	-0.142417	0.0524159	0.0342157	-0.011588	-0.0969617	-0.109359	0.0299829	-0.28279	-0.286304	-0.224317	-0.244685	0.0366658	0.534543	-0.156647	FALSE
KIF5C_MOUSE	(P28738) Kinesin heavy chain isoform 5C	-0.027675	-0.12658	-0.0558912	-0.174621	0.0384362	-0.0262051	0.00288251	-0.0740006	0.111031	0.0370307	0	0.0367419	0.534543	0.108931	FALSE
GANAB_MOUSE	(Q8BHN3) Neutral alpha-glucosidase AB	-0.0203404	0.255803	0.230203	0.233888	0.178874	-0.171368	-0.0101344	0.0854247	-0.446148	-0.155213	-0.00144342	0.0371683	0.534543	-0.249175	FALSE
BRK1_MOUSE	(Q91VR8) Protein BRICK1	0.494672	0.528071	0.22404	0.301002	0.0143553	-0.202572	0.146655	0.390668	-0.114035	0.27262	0.283329	0.0376611	0.534543	-0.273943	FALSE
ALDH2_MOUSE	(P47738) Aldehyde dehydrogenase, mitochondrial	0.00288251	0.282143	0.123004	0.288063	-0.00723157	-0.0588937	0.0786098	-0.349235	0.180148	-0.114035	-0.169745	0.0378215	0.534543	-0.236935	FALSE
CBR1_MOUSE	(P48758) Carbonyl reductase [NADPH] 1	-0.117161	-0.268817	-0.325539	-0.307573	-0.325539	-0.123434	-0.253257	0.0356239	0.488515	0.335712	0.421156	0.0384266	0.535951	0.337455	FALSE
TOM70_MOUSE	(Q9CZW5) Mitochondrial import receptor subunit TOM70	0.0593553	-0.0335695	-0.158429	-0.0513992	-0.522841	-0.224317	-0.132894	-0.281036	-0.128156	-0.077041	-0.169745	0.0397925	0.542276	-0.173422	FALSE
PACS1_MOUSE	(Q8K212) Phosphofurin acidic cluster sorting protein 1	-0.169745	-0.0350469	-0.0985055	-0.155213	-0.0528949	0.237564	-0.0877334	-0.112475	0.0143553	0.0342157	0.0731347	0.0407789	0.542276	0.129794	FALSE
KPYM_MOUSE	(P52480) Pyruvate kinase isozymes M1/M2	-0.0320936	0.0894982	0.0342157	-0.103147	0.246104	0.111031	-0.00868224	0.138814	0.212881	0.0621217	0.158337	0.0409406	0.542276	0.134397	FALSE
HEM6_MOUSE	(P36552) Coproporphyrinogen-III oxidase, mitochondrial	0.0398403	-0.011588	0.0593553	0.133564	-0.209228	-0.202572	0.233888	0.00144197	-0.215915	-0.22095	-0.284546	0.0412028	0.542276	-0.183561	FALSE
STX8_MOUSE	(O88983) Syntaxin-8	0.298658	0.252173	0.015783	0.365133	0.120352	0.199123	-0.118727	0.155749	-0.545824	-0.0634092	-0.169745	0.0417971	0.542276	-0.293291	FALSE
RAB3B_MOUSE	(Q9CZT8) Ras-related protein Rab-3B	-0.011588	-0.258425	0	-0.187707	0.0648829	-0.0513992	0.0496308	-0.0634092	0.145351	0.227741	0.244887	0.0428047	0.542276	0.202671	FALSE
GAS7_MOUSE	(Q60780) Growth arrest-specific protein 7	0.115033	0.0551957	0.105678	-0.0439433	1.82456	-0.086201	1.6234	1.67897	-0.182786	0.475085	0.812293	0.0430205	0.542276	0.819913	FALSE
SE6L2_MOUSE	(Q4V9Z5) Seizure 6-like protein 2	0.102994	0.192825	0.0143553	0.293959	-0.00578235	-0.194295	-0.011588	0.233888	-0.380822	-0.212568	0.0328061	0.04328	0.542276	-0.227942	FALSE
SYHC_MOUSE	(Q61035) Histidine--tRNA ligase, cytoplasmic	0.0935602	0.157044	0.125651	0.0200577	0.0129262	-0.0409718	0.0426443	0.126973	0.0299829	-0.100051	-0.0740006	0.0434844	0.542276	-0.0994349	FALSE
DCE2_MOUSE	(P48320) Glutamate decarboxylase 2	-0.0679388	-0.179515	0.108357	0.0299829	0.453122	0.378512	0.163499	0.197865	0.27262	-0.0262051	-0.0679388	0.0462626	0.570214	0.223203	FALSE
BDH_MOUSE	(Q80XN0) D-beta-hydroxybutyrate dehydrogenase, mitochondrial	0.00288251	0.175045	0.0607392	0.0593553	-0.0291463	0.117695	0.342555	0.290424	0.342555	0.339137	0.166073	0.047814	0.578251	0.149679	FALSE
DPYL4_MOUSE	(O35098) Dihydropyrimidinase-related protein 4	-0.0499049	0.0200577	0.0867838	-0.200913	0.267835	0.0328061	0.145351	0.0935602	0.237564	0.0398403	0.225275	0.0480057	0.578251	0.184884	FALSE
IDHG1_MOUSE	(P70404) Isocitrate dehydrogenase [NAD] subunit gamma 1, mitochondrial	0.182692	0.308011	0.191563	0.305679	-0.0513992	0.0894982	0.249749	0.121679	0.257011	0.116365	-0.229382	0.0496366	0.584667	-0.167912	FALSE
HINT1_MOUSE	(P70349) Histidine triad nucleotide-binding protein 1	0.051024	0.0922074	-0.0892673	0.051024	0.177599	-0.00578235	0.0922074	0.389567	0.206643	0.0989585	0.205393	0.0496416	0.584667	0.140122	FALSE
KIF1A_MOUSE	(P33173) Kinesin-like protein KIF1A	0.138814	0.0538064	-0.0634092	-0.0603973	0.194087	0.0635029	0.243669	0.111031	0.121679	0.293959	0.105678	0.0505936	0.589332	0.14474	FALSE
RAB5C_MOUSE	(P35278) Ras-related protein Rab-5C	-0.0174171	0.153157	0.0186342	-0.00433459	-0.125006	0.0593553	-0.0513992	-0.0649175	-0.254978	0.00144197	-0.226004	0.0525406	0.603377	-0.132011	FALSE
SUGT1_MOUSE	(Q9CX34) Suppressor of G2 allele of SKP1 homolog	0.0607392	0.222805	0.0271541	0.144046	-0.231075	0.0690147	-0.0350469	-0.277534	-0.0380063	0.0214797	0.147958	0.0530886	0.603377	-0.162716	FALSE
SEP11_MOUSE	(Q8C1B7) Septin-11	-0.153607	-0.242977	0.202888	-0.520769	0.563646	0.455229	0.496718	-0.325539	0.296311	0.0908534	0.282143	0.053507	0.603377	0.444239	FALSE
TIM44_MOUSE	(O35857) Mitochondrial import inner membrane translocase subunit TIM44	-0.0892673	0.0086303	0.0989585	0.138814	-0.166503	-0.217591	-0.0439433	-0.148801	0.0621217	-0.0394883	-0.212568	0.056554	0.627264	-0.148823	FALSE
CAMKV_MOUSE	(Q3UHL1) CaM kinase-like vesicle-associated protein	-0.0634092	-0.07552	0.0922074	-0.0573917	0.129613	0.0621217	0.269033	0.115033	-0.100051	0.119024	0.108357	0.0571104	0.627264	0.126476	FALSE
SYJ2B_MOUSE	(Q9D6K5) Synaptojanin-2-binding protein	0.187768	0.0200577	-0.0159576	-0.00144342	-0.0603973	-0.0558912	0.0813396	-0.0424568	-0.12658	-0.284546	-0.190997	0.0577491	0.627264	-0.144682	FALSE
PRDX3_MOUSE	(P20108) Thioredoxin-dependent peroxide reductase, mitochondrial	0.0745054	0.230203	0.0524159	0.275007	-0.046921	-0.0724828	0.183963	-0.121863	0.180148	-0.0262051	-0.209228	0.0579923	0.627264	-0.174117	FALSE
PRRT2_MOUSE	(E9PUL5) Proline-rich transmembrane protein 2	0.0426443	-0.200913	-0.0101344	-0.07552	0.204141	0.00432161	-0.0573917	0.243669	-0.0603973	0.269033	0.105678	0.0618064	0.637767	0.162274	FALSE
RUVB2_MOUSE	(Q9WTM5) RuvB-like 2	0.117695	0.0186342	0.176323	0.171207	0.158337	-0.0320936	-0.018878	-0.120294	0.0086303	-0.013043	0.0962619	0.0618789	0.637767	-0.10969	FALSE
NDUB9_MOUSE	(Q9CQJ8) NADH dehydrogenase [ubiquinone] 1 beta subcomplex subunit 9	-0.0573917	0.27858	0.365133	0.543001	-0.281036	-0.00723157	0.453122	0.0731347	-0.571322	-0.177882	-0.171368	0.0619907	0.637767	-0.379842	TRUE
ECHM_MOUSE	(Q8BH95) Enoyl-CoA hydratase, mitochondrial	-0.0513992	0.177599	0.0313952	0.0745054	0.285698	0.0758749	0.380729	0.329985	0.248535	0.222805	-0.0394883	0.0624174	0.637767	0.156852	FALSE
PDIA4_MOUSE	(P08003) Protein disulfide-isomerase A4	-0.0831412	0.0243197	-0.362158	0.109695	-0.296899	-0.336428	-0.508403	-0.109359	-0.744197	-0.321928	-0.244685	0.0637697	0.637767	-0.288164	FALSE
CYTC_MOUSE	(P21460) Cystatin-C	-0.215915	-0.142417	0.0328061	0.0229004	-0.1976	-0.369595	-0.109359	-0.286304	-0.407364	-0.168123	-0.184425	0.0637767	0.637767	-0.170453	FALSE
MARCS_MOUSE	(P26645) Myristoylated alanine-rich C-kinase substrate	-0.200913	0.0989585	-0.0247367	-0.0785637	0.255803	0.120352	0.308011	0.0243197	0.111031	0.00288251	0.0299829	0.0640825	0.637767	0.173083	FALSE
KCD12_MOUSE	(Q6WVG3) BTB/POZ domain-containing protein KCTD12	-0.093879	0.123004	-0.00288828	0.134878	0.0342157	0.0426443	-0.109359	-0.0320936	-0.450084	-0.242977	-0.249822	0.0644072	0.637767	-0.184204	FALSE
AIFM1_MOUSE	(Q9Z0X1) Apoptosis-inducing factor 1, mitochondrial	0.0745054	0.227741	0.0662614	-0.0694519	-0.365871	-0.265345	-0.0350469	0.00144197	0.0243197	0.0086303	-0.106249	0.0648586	0.637767	-0.18021	FALSE
RB11B_MOUSE	(P46638) Ras-related protein Rab-11B	0.123004	0.0313952	-0.0218044	0.303342	-0.0365259	-0.148801	-0.0320936	0.0243197	-0.077041	-0.103147	-0.209228	0.066673	0.637767	-0.192201	FALSE
TLN2_MOUSE	(Q71LX4) Talin-2	0.0962619	0.045443	0.0621217	-0.0543923	0.128293	0.077243	0.0482362	0.149259	0.0745054	0.163499	0.266637	0.0668046	0.637767	0.092309	FALSE
ARHG2_MOUSE	(Q60875) Rho guanine nucleotide exchange factor 2	-0.0262051	0.24732	0.00144197	0.205393	-0.0454314	-0.0232698	-0.00144342	-0.0969617	-0.430509	-0.0350469	0.00288251	0.0668587	0.637767	-0.196956	FALSE
OXR1_MOUSE	(Q4KMM3) Oxidation resistance protein 1	0.0313952	0.00288251	-0.0262051	-0.134477	-0.0724828	0.0257376	0.0989585	0.077243	0.194087	0.0703893	0.102994	0.0674812	0.637767	0.102591	FALSE
UBA1_MOUSE	(Q02053) Ubiquitin-like modifier-activating enzyme 1	-0.0484122	-0.0969617	0.0257376	-0.284546	-0.011588	0.0867838	-0.0380063	0.045443	0.228973	0.0426443	0.176323	0.0676673	0.637767	0.176842	FALSE
PI42B_MOUSE	(Q80XI4) Phosphatidylinositol 5-phosphate 4-kinase type-2 beta	-0.155213	-0.12658	0.0100637	-0.195946	0.0867838	0.0328061	0.0172093	-0.0908029	-0.0513992	0.0229004	-0.00288828	0.0679884	0.637767	0.119006	FALSE
ALDOC_MOUSE	(P05063) Fructose-bisphosphate aldolase C	-0.120294	-0.07552	-0.0365259	-0.336428	-0.229382	-0.0800879	-0.086201	0.138814	0.370722	0.221568	0.167358	0.0702283	0.648402	0.214019	FALSE
FBX2_MOUSE	(Q80UW2) F-box only protein 2	-0.0218044	-0.0454314	0.0607392	-0.0232698	-0.168123	0.0786098	0.0799754	0.199123	0.339137	0.221568	0.144046	0.0706527	0.648402	0.135204	FALSE
CALB2_MOUSE	(Q08331) Calretinin	0.302173	-0.147202	-0.0454314	-0.131313	0.154454	0.0229004	-0.176251	1.42062	0.660837	0.355016	0.994218	0.0709572	0.648402	0.495699	FALSE
EHD3_MOUSE	(Q9QXY6) EH domain-containing protein 3	0.0840643	0.0662614	0.0538064	0.0538064	0.0648829	0.115033	-0.0101344	0.14274	0.230203	0.222805	0.290424	0.0723343	0.652082	0.0863659	FALSE
CNTP1_MOUSE	(O54991) Contactin-associated protein 1	0.0676387	0.0976108	0.0071955	-0.0923402	-0.204233	0.0799754	-0.471929	0.145351	-0.33825	-0.0985055	-0.382702	0.0738353	0.652082	-0.201497	FALSE
MRP_MOUSE	(P28667) MARCKS-related protein	0.0384362	0.410341	0.104337	-0.00868224	-0.139236	-0.234465	-0.0954196	0.121679	0.0840643	-0.155213	-0.369595	0.073938	0.652082	-0.248706	FALSE
SCPDL_MOUSE	(Q8R127) Saccharopine dehydrogenase-like oxidoreductase	-0.013043	-0.145605	-0.239566	0	-0.450084	-0.272297	-0.106249	-0.194295	-0.172994	-0.291592	-0.270556	0.074243	0.652082	-0.151599	FALSE
TBB3_MOUSE	(Q9ERD7) Tubulin beta-3 chain	-0.093879	-0.171368	-0.0513992	-0.0816138	0.0676387	0.0827026	-0.142417	-0.0709665	-0.0247367	-0.07552	0.0440443	0.0750116	0.652082	0.0825287	FALSE
ECHB_MOUSE	(Q99JY0) Trifunctional enzyme subunit beta, mitochondrial	-0.0679388	0.0648829	0.105678	-0.115597	0.167358	0.303342	0.302173	0.100305	0.316146	0.0257376	-0.100051	0.0750509	0.652082	0.162531	FALSE
RASL1_MOUSE	(Q9Z268) RasGAP-activating-like protein 1	0.0786098	0.0271541	0.0384362	0.00288251	0.0690147	0.0786098	0.232661	0.166073	0.0342157	0.0186342	0.120352	0.0763887	0.656195	0.0660236	FALSE
SYSC_MOUSE	(P26638) Serine--tRNA ligase, cytoplasmic	-0.0499049	0.0086303	-0.018878	-0.115597	0.104337	0.0384362	-0.0439433	0.051024	-0.00433459	-0.0247367	0.0648829	0.0769244	0.656195	0.0704611	FALSE
BIN1_MOUSE	(O08539) Myc box-dependent-interacting protein 1	0.116365	0.159629	-0.242977	0.319618	-0.22095	-0.150401	-0.16004	-0.567041	-0.140826	0.0922074	-0.382702	0.0773815	0.656195	-0.306695	FALSE
ANXA3_MOUSE	(O35639) Annexin A3	0.0426443	0.259423	-0.367732	0.149259	-0.152003	-0.336428	-0.380822	-0.237864	-0.588574	-0.341903	-0.234465	0.0794842	0.662864	-0.345479	FALSE
ANK3_MOUSE	(G5E8K5) Ankyrin-3	0.121679	-0.0291463	0.015783	-0.0144996	0.341417	0.0200577	0.146655	0.368489	-0.0499049	0.120352	0.149259	0.0802822	0.662864	0.133164	FALSE
APOA1_MOUSE	(Q00623) Apolipoprotein A-I	0.0370307	0.168642	-0.195946	0.0881416	0.349365	0.334568	0.111031	0.238787	-0.0306192	0.393965	0.187768	0.0808932	0.662864	0.201942	FALSE
ACTZ_MOUSE	(P61164) Alpha-centractin	-0.106249	0.0186342	0.015783	0.0271541	0.246104	0.175045	-0.00868224	0.167358	0.00432161	-0.0247367	0.0676387	0.0817577	0.662864	0.100748	FALSE
PRDX1_MOUSE	(P35700) Peroxiredoxin-1	-0.0409718	0.0538064	-0.0159576	-0.0454314	0.0426443	-0.100051	-0.0394883	-0.107803	-0.107803	-0.0724828	-0.176251	0.0817969	0.662864	-0.0680378	FALSE
EZRI_MOUSE	(P26040) Ezrin	-0.00288828	-0.0409718	-0.0499049	-0.15682	-0.164884	-0.0306192	0.134878	0.215368	-0.0424568	0.134878	0.164786	0.0819805	0.662864	0.121496	FALSE
SH3G1_MOUSE	(Q62419) Endophilin-A2	0.10165	-0.07552	0.0690147	-0.131313	0.237564	0.0799754	0.371838	0.0854247	0.140124	0.0299829	0.0299829	0.0828372	0.662864	0.148312	FALSE
SCMC2_MOUSE	(A2ASZ8) Calcium-binding mitochondrial carrier protein SCaMC-2	0.0786098	0.0551957	-0.155213	0.197865	-0.226004	-0.33825	-0.0291463	-0.147202	0.125651	-0.142417	-0.275786	0.0832189	0.662864	-0.191708	FALSE
SEPT4_MOUSE	(P28661) Septin-4	0.0342157	-0.14401	0.0935602	-0.229382	0.298658	0.597412	0.261832	-0.0335695	0.206643	-0.147202	0.0271541	0.0841518	0.662864	0.234394	FALSE
SH3G3_MOUSE	(Q62421) Endophilin-A3	-0.0350469	-0.0709665	0.124328	-0.152003	0.235114	0.0370307	0.205393	-0.0380063	0.228973	0.112367	0.015783	0.0847623	0.662864	0.14723	FALSE
RAB14_MOUSE	(Q91V41) Ras-related protein Rab-14	-0.0709665	-0.0306192	-0.0203404	-0.192645	0.00432161	-0.0232698	-0.0394883	0.0313952	0.0635029	0.0356239	0.0565835	0.0854707	0.662864	0.0970241	FALSE
MTFP1_MOUSE	(Q9CRB8) Mitochondrial fission process protein 1	-0.161653	0.0538064	-0.0218044	0.120352	-0.164884	-0.307573	0.0271541	-0.215915	-0.101598	-0.0785637	-0.237864	0.0861473	0.662864	-0.151853	FALSE
CNPY2_MOUSE	(Q9QXT0) Protein canopy homolog 2	-0.114035	-0.0664274	-0.325539	0.0989585	-0.279284	-0.117161	-0.614845	-0.177882	-0.630394	-0.291592	-0.224317	0.0862974	0.662864	-0.231878	FALSE
VATG2_MOUSE	(Q9WTT4) V-type proton ATPase subunit G 2	0.0426443	0.045443	-0.00433459	-0.132894	0.0551957	0.151859	0.109695	0.112367	0.112367	0.0621217	0.0172093	0.0884469	0.670414	0.100973	FALSE
S6A17_MOUSE	(Q8BJI1) Sodium-dependent neutral amino acid transporter SLC6A17	-0.0724828	-0.295128	-0.0409718	-0.0846703	0.045443	-0.0649175	0.0621217	0.132248	-0.117161	0.0229004	0.0398403	0.0885453	0.670414	0.140524	FALSE
FAAA_MOUSE	(P35505) Fumarylacetoacetase	-0.132894	0.0881416	0.0384362	-0.234465	-0.077041	0.117695	-0.0232698	0.342555	0.279768	0.0257376	0.257011	0.0895283	0.67305	0.191975	FALSE
SEPT5_MOUSE	(Q9Z2Q6) Septin-5	0.192825	-0.234465	0.24245	-0.161653	0.282143	0.695103	0.379621	0.0143553	0.311503	0.154454	0.305679	0.0903745	0.674626	0.296333	FALSE
PDIA1_MOUSE	(P09103) Protein disulfide-isomerase	-0.125006	-0.153607	-0.367732	0.00144197	-0.390245	-0.260152	-0.696658	-0.288065	-0.588574	-0.152003	-0.205896	0.0921106	0.679462	-0.207573	FALSE
KINH_MOUSE	(Q61768) Kinesin-1 heavy chain	0.0426443	-0.137648	-0.0365259	-0.179515	0.129613	-0.0380063	-0.0335695	-0.0619024	0.154454	0.0745054	0.0813396	0.0923043	0.679462	0.121537	FALSE
SEPT7_MOUSE	(O55131) Septin-7	0.164786	0.0949116	0.243669	-0.364013	0.344828	0.547943	0.387363	0.0635029	0.534062	0.205393	0.41792	0.0934429	0.6831	0.322449	FALSE
QCR6_MOUSE	(P99028) Cytochrome b-c1 complex subunit 6, mitochondrial	0.0114956	-0.118727	-0.0513992	0.222805	-0.304006	-0.104697	-0.120294	-0.140826	-0.270556	0.0398403	-0.21424	0.0949902	0.686365	-0.175298	TRUE
GHC1_MOUSE	(Q9D6M3) Mitochondrial glutamate carrier 1	0.0593553	-0.136062	-0.0816138	0.225275	-0.58208	-0.242977	-0.0159576	0.125651	-0.394032	-0.128156	-0.22095	0.0955246	0.686365	-0.225096	FALSE
CYFP1_MOUSE	(Q7TMB8) Cytoplasmic FMR1-interacting protein 1	-0.0409718	0.0894982	-0.125006	0.0551957	-0.182786	0.0676387	-0.253257	-0.0101344	-0.367732	-0.128156	-0.121863	0.0961354	0.686365	-0.137006	FALSE
ADDA_MOUSE	(Q9QYC0) Alpha-adducin	0.0690147	0.0621217	-0.018878	0.00144197	0.0894982	0.129613	-0.0365259	0.146655	0.0840643	0.204141	0.0524159	0.0965313	0.686365	0.0672694	FALSE
ACBG1_MOUSE	(Q99PU5) Long-chain-fatty-acid--CoA ligase ACSBG1	-0.0380063	-0.209228	-0.011588	-0.152003	-0.0380063	0.0799754	-0.077041	0.0214797	-0.0262051	0.0100637	0.0717627	0.0974694	0.686365	0.10871	FALSE
SEPT9_MOUSE	(Q80UG5) Septin-9	0.183963	0.0071955	0.157044	-0.270556	0.166073	0.362891	0.168642	0.250962	0.426533	0.214125	0.24123	0.0977746	0.686365	0.242082	FALSE
EFTU_MOUSE	(Q8BFR5) Elongation factor Tu, mitochondrial	-0.07552	0.0186342	0.0271541	0.0100637	-0.270556	-0.0785637	0.0370307	-0.1976	0.0621217	-0.0694519	-0.217591	0.0998977	0.690371	-0.100027	FALSE
MADD_MOUSE	(Q80U28) MAP kinase-activating death domain protein	-0.0247367	0.105678	0.0214797	-0.0528949	0.474047	-0.0335695	0.0271541	0.538041	0.172488	0.158337	1.53356	0.100282	0.690371	0.397627	FALSE
EMC2_MOUSE	(Q9CRD2) ER membrane protein complex subunit 2	0.286881	0.16221	0.105678	-0.093879	2.38239	0.709291	1.70177	1.12961	-0.316528	0.172488	0.0384362	0.100942	0.690371	0.715843	FALSE
AATC_MOUSE	(P05201) Aspartate aminotransferase, cytoplasmic	0.0440443	0.0229004	0.0854247	-0.239566	0.136191	0.0285692	0.227741	0.117695	0.275007	0.0482362	0.196607	0.10095	0.690371	0.168949	FALSE
SERC_MOUSE	(Q99K85) Phosphoserine aminotransferase	0.0342157	0.246104	-0.12658	-0.207561	0.107018	0.0482362	0.0100637	0.578214	0.285698	0.390668	0.169925	0.101971	0.691568	0.240573	FALSE
CYC_MOUSE	(P62897) Cytochrome c, somatic	-0.210897	-0.284546	-0.027675	-0.207561	-0.187707	0.169925	-0.163268	-0.176251	0.276199	0.0854247	-0.129734	0.102743	0.691568	0.164754	TRUE
HS90B_MOUSE	(P11499) Heat shock protein HSP 90-beta	-0.0543923	-0.0203404	-0.115597	-0.018878	-0.195946	-0.0291463	-0.215915	-0.311148	-0.00868224	-0.0969617	-0.106249	0.103083	0.691568	-0.0854193	FALSE
TCPZ_MOUSE	(P80317) T-complex protein 1 subunit zeta	0.0271541	0.0621217	-0.0350469	0.134878	0.015783	-0.0203404	-0.128156	-0.0816138	-0.0454314	0.0426443	-0.0203404	0.105065	0.695065	-0.0811989	FALSE
NEUL_MOUSE	(Q91YP2) Neurolysin, mitochondrial	0.104337	-0.181149	-0.0634092	-0.229382	-0.120294	0.051024	0.149259	0.100305	0.243669	0.00288251	0.111031	0.105224	0.695065	0.169241	FALSE
DPYL2_MOUSE	(O08553) Dihydropyrimidinase-related protein 2	0.0071955	-0.0558912	-0.182786	-0.239566	-0.0649175	0.0827026	-0.152003	-0.018878	0.0662614	-0.0203404	0.252173	0.105571	0.695065	0.138476	FALSE
ARP3B_MOUSE	(Q641P0) Actin-related protein 3B	-0.00288828	0.112367	-0.0394883	0.0071955	-0.155213	-0.0409718	-0.15682	0.0398403	0.015783	-0.0694519	-0.0573917	0.106881	0.696813	-0.0798999	FALSE
F136A_MOUSE	(Q9CR98) Protein FAM136A	-0.100051	-0.312939	-0.077041	-0.217591	-0.479955	-0.123434	-0.217591	-0.641604	-0.163268	-0.298673	-0.446148	0.107151	0.696813	-0.161762	FALSE
CALB1_MOUSE	(P12658) Calbindin	-0.26708	0.0949116	0.413594	-0.298673	0.387363	0.248535	0.531069	0.571434	0.249749	0.0482362	0.480265	0.1084	0.700633	0.373833	FALSE
SYSM_MOUSE	(Q9JJL8) Serine--tRNA ligase, mitochondrial	-0.0724828	-0.62371	-0.129734	-0.477944	0.116365	-0.0908029	0.372952	0.102994	-0.0320936	-0.101598	-0.479955	0.109756	0.704904	0.309948	FALSE
NAKD1_MOUSE	(Q8C5H8) NAD kinase domain-containing protein 1, mitochondrial	-0.0320936	-0.00578235	-0.0439433	-0.0350469	0.154454	0.0840643	0.173767	0.209141	0.120352	-0.209228	-0.018878	0.111063	0.704904	0.102598	FALSE
NGEF_MOUSE	(Q8CHT1) Ephexin-1	0.485427	0.226509	0.112367	-0.103147	0.204141	-0.21927	0.185232	-0.199255	-0.413115	-0.103147	-0.137648	0.112072	0.704904	-0.277869	FALSE
AP3M2_MOUSE	(Q8R2R9) AP-3 complex subunit mu-2	0.273814	0.0086303	0.0356239	-0.0664274	0.154454	-0.011588	0.111031	0.332278	0.672652	0.22404	0.331132	0.112183	0.704904	0.196232	FALSE
EHD1_MOUSE	(Q9WVK4) EH domain-containing protein 1	0.105678	0.151859	0.169925	0.230203	0.205393	0.153157	0.102994	0.265437	0.305679	0.381837	0.280956	0.112386	0.704904	0.0777912	FALSE
NEUG_MOUSE	(P60761) Neurogranin	-0.00433459	-0.320126	-0.0588937	-0.643856	-0.246395	-0.321928	-0.100051	0.449957	0.366252	0.0524159	0.420078	0.113658	0.707973	0.345421	FALSE
SNX3_MOUSE	(O70492) Sorting nexin-3	-0.0724828	0.132248	-0.181149	-0.0291463	0.0854247	0.0257376	0.21661	0.453122	-0.00433459	0.365133	-0.142417	0.115519	0.707973	0.180386	FALSE
LPHN3_MOUSE	(Q80TS3) Latrophilin-3	0.154454	-0.0969617	0.0703893	0.0482362	-0.0484122	-0.104697	-0.134477	0.0731347	-0.0619024	0.0243197	-0.296899	0.118981	0.707973	-0.122448	FALSE
RAB18_MOUSE	(P35293) Ras-related protein Rab-18	-0.112475	-0.0800879	0.00288251	-0.104697	-0.00578235	0.105678	-0.0424568	0.308011	-0.07552	-0.123434	0.0524159	0.120454	0.707973	0.104868	FALSE
ATPD_MOUSE	(Q9D3D9) ATP synthase subunit delta, mitochondrial	0.00288251	0.0840643	0.0114956	0.133564	-0.12658	-0.0573917	0.211635	-0.129734	0.0935602	-0.145605	-0.293359	0.120836	0.707973	-0.121926	FALSE
GSTM5_MOUSE	(P48774) Glutathione S-transferase Mu 5	0.182692	0.158337	0.130931	-0.136062	-0.0800879	0.144046	-0.00288828	0.400538	0.550901	0.521051	0.614474	0.121012	0.707973	0.222887	FALSE
GRPE1_MOUSE	(Q99LP6) GrpE protein homolog 1, mitochondrial	-0.118727	-0.0679388	-0.0409718	-0.0513992	-0.21424	-0.182786	0.0482362	-0.318326	-0.0709665	-0.0923402	-0.378944	0.121181	0.707973	-0.103008	FALSE
BCAS3_MOUSE	(Q8CCN5) Breast carcinoma-amplified sequence 3 homolog	0	-0.125006	0.0100637	0.0143553	0.0799754	0.0328061	0.155749	0.0129262	0.0635029	-0.046921	0.0426443	0.121287	0.707973	0.0738159	FALSE
THNS1_MOUSE	(Q8BH55) Threonine synthase-like 1	-0.0724828	0.136191	0.230203	0.202888	-0.0203404	-0.112475	0.222805	-0.153607	0.151859	-0.109359	-0.2567	0.121759	0.707973	-0.163888	FALSE
MP2K4_MOUSE	(P47809) Dual specificity mitogen-activated protein kinase kinase 4	0.136191	0.301002	0.100305	0.199123	0.102994	0.178874	-0.148801	0.107018	0.0496308	0.147958	0.120352	0.122494	0.707973	-0.104437	FALSE
TCPE_MOUSE	(P80316) T-complex protein 1 subunit epsilon	0.0538064	0.130931	0.00144197	0.0840643	0.0731347	0.0690147	0.0662614	-0.0291463	-0.0320936	-0.0603973	-0.0499049	0.123512	0.707973	-0.0622939	FALSE
GAK_MOUSE	(Q99KY4) Cyclin-G-associated kinase	0.133564	0.158337	0.00288251	-0.0262051	0.104337	0.0881416	0.252173	0.1137	0.279768	0.128293	0.196607	0.124595	0.707973	0.0990014	FALSE
DPYL1_MOUSE	(P97427) Dihydropyrimidinase-related protein 1	-0.145605	0	0.0922074	-0.107803	0.0243197	0.348232	0.0243197	-0.0709665	0.0976108	0.0299829	0.158337	0.12511	0.707973	0.127705	FALSE
HS105_MOUSE	(Q61699) Heat shock protein 105 kDa	-0.00723157	-0.152003	-0.00433459	-0.109359	-0.0603973	-0.0954196	-0.168123	-0.270556	-0.077041	-0.217591	-0.168123	0.125757	0.707973	-0.0828038	FALSE
ML12B_MOUSE	(Q3THE2) Myosin regulatory light chain 12B	-0.0528949	0.137504	0.0285692	0.0676387	0.138814	0.10165	0.447844	-0.0306192	0.24245	0.077243	0.159629	0.125949	0.707973	0.117226	FALSE
ECHA_MOUSE	(Q8BMS1) Trifunctional enzyme subunit alpha, mitochondrial	-0.190997	-0.428566	0.0143553	-0.603841	-0.0247367	0.318461	0.182692	-0.161653	0.045443	-0.129734	-0.332789	0.126256	0.707973	0.287645	FALSE
CROCC_MOUSE	(Q8CJ40) Rootletin	0.0635029	0.0607392	0.0426443	0.137504	-0.224317	-0.254978	0.372952	0.22033	-0.619271	-0.234465	-0.318326	0.126636	0.707973	-0.227251	FALSE
ARSB_MOUSE	(P50429) Arylsulfatase B	0.0482362	0.379621	-0.131313	0.14274	0.0440443	-0.0908029	-0.249822	0.0908534	-0.486004	-0.114035	-0.0203404	0.130336	0.707973	-0.227836	FALSE
TCPH_MOUSE	(P80313) T-complex protein 1 subunit eta	-0.0203404	0.0989585	0.0976108	-0.0159576	0.0229004	0.077243	-0.104697	-0.114035	0.0299829	-0.152003	-0.0320936	0.131172	0.707973	-0.0790254	FALSE
PYC_MOUSE	(Q05920) Pyruvate carboxylase, mitochondrial	0.166073	0.0398403	-0.0203404	0.0271541	-0.0816138	-0.093879	0.178874	-0.140826	0.0854247	-0.112475	-0.242977	0.131307	0.707973	-0.111392	FALSE
CHP1_MOUSE	(P61022) Calcineurin B homologous protein 1	0.171207	-0.488026	-0.190997	-0.0513992	0.0524159	0.0482362	-0.181149	0.522056	0.314986	0.0172093	0.275007	0.132007	0.707973	0.289627	FALSE
PYGB_MOUSE	(Q8CI94) Glycogen phosphorylase, brain form	0.180148	0.0114956	0.0648829	-0.215915	-0.0484122	0.144046	0.16092	0.260628	0.291604	0.248535	0.200379	0.134364	0.707973	0.169518	FALSE
GSTP1_MOUSE	(P19157) Glutathione S-transferase P 1	-0.0985055	0.1137	-0.0558912	0.0758749	0.169925	-0.0101344	0.015783	0.149259	0.186501	0.119024	0.166073	0.134521	0.707973	0.104981	FALSE
PEX5R_MOUSE	(Q8C437) PEX5-related protein	0.107018	-0.0634092	0.124328	0.0579701	1.09018	0.104337	0.200379	1.00216	-0.0247367	0.0935602	0.100305	0.135136	0.707973	0.310121	FALSE
DJB11_MOUSE	(Q99KV1) DnaJ homolog subfamily B member 11	0.159629	0.0717627	-0.416962	0.324235	-0.136062	-0.232769	-0.588574	-0.438307	-0.590745	0.0186342	-0.0800879	0.135475	0.707973	-0.327225	FALSE
NOL3_MOUSE	(Q9D1X0) Nucleolar protein 3	0.187768	-0.120294	0.378512	0.259423	0.379621	-0.0603973	0.312665	-0.231075	-0.305788	-0.438307	-0.272297	0.135493	0.707973	-0.264292	FALSE
PPIA_MOUSE	(P17742) Peptidyl-prolyl cis-trans isomerase A	0.0271541	0.0989585	0.0257376	0.0799754	0.0328061	0.124328	0.0908534	0.14274	0.130931	0.121679	0.051024	0.136367	0.707973	0.0412381	FALSE
DCE1_MOUSE	(P48318) Glutamate decarboxylase 1	0.0342157	-0.298673	-0.152003	-0.194295	-0.0335695	-0.086201	0.0496308	-0.0218044	0.141433	-0.0247367	-0.114035	0.136406	0.707973	0.139934	FALSE
SNX6_MOUSE	(Q6P8X1) Sorting nexin-6	-0.0484122	0.0468403	0.16221	0.015783	0.178874	0.128293	0.14274	0.325386	0.282143	-0.0603973	0.0690147	0.136687	0.707973	0.108188	FALSE
OCAD1_MOUSE	(Q9CRD0) OCIA domain-containing protein 1	-0.137648	-0.0365259	0.0579701	-0.00144342	-0.268817	-0.360305	0.0690147	-0.33825	-0.0424568	-0.0335695	-0.0969617	0.136782	0.707973	-0.123638	FALSE
HBB1_MOUSE	(P02088) Hemoglobin subunit beta-1	-0.077041	-0.189351	-1.00289	0.645241	-0.575615	-0.386468	-1.22769	-0.405451	-1.1488	-1.00578	-1.05589	0.137871	0.707973	-0.673376	FALSE
RAB3A_MOUSE	(P63011) Ras-related protein Rab-3A	-0.00723157	-0.312939	0.0440443	-0.224317	0.0257376	0.0200577	-0.011588	0.0676387	0.0881416	0.0285692	0.100305	0.138434	0.707973	0.170663	FALSE
RRFM_MOUSE	(Q9D6S7) Ribosome-recycling factor, mitochondrial	-0.205896	-0.0923402	-0.169745	0.0440443	-0.349235	-0.0634092	0.051024	-0.422752	-0.215915	-0.275786	-0.562772	0.139349	0.707973	-0.156708	FALSE
ANXA5_MOUSE	(P48036) Annexin A5	0.00144197	0.0538064	-0.117161	0.111031	-0.0409718	-0.046921	-0.186065	0.0827026	-0.169745	-0.174621	-0.0985055	0.139583	0.707973	-0.102869	FALSE
CH60_MOUSE	(P63038) 60 kDa heat shock protein, mitochondrial	-0.12658	-0.104697	-0.114035	-0.179515	-0.426625	-0.0846703	-0.140826	-0.516636	-0.0499049	-0.182786	-0.332789	0.140841	0.707973	-0.116541	FALSE
KCRU_MOUSE	(P30275) Creatine kinase U-type, mitochondrial	0.178874	-0.0218044	0.175045	-0.0513992	-0.0649175	-0.12658	0.0758749	0.0356239	0.0328061	-0.139236	-0.209228	0.141381	0.707973	-0.126701	FALSE
NFM_MOUSE	(P08553) Neurofilament medium polypeptide	-0.0409718	0.298658	0.126973	0.209141	0.0579701	0.124328	-0.37146	0.00288251	-0.210897	0.27739	-0.0724828	0.142133	0.707973	-0.175917	FALSE
RT27_MOUSE	(Q8BK72) 28S ribosomal protein S27, mitochondrial	-0.181149	-0.129734	-0.0499049	-0.202572	-0.336428	-0.21424	-0.106249	-0.512514	-0.103147	-0.0985055	-0.465938	0.14234	0.707973	-0.121592	FALSE
LANC1_MOUSE	(O89112) LanC-like protein 1	-0.263612	-0.0816138	-0.37707	0.136191	-0.128156	-0.239566	-0.416962	-0.390245	-0.888969	-0.384584	-0.254978	0.143964	0.707973	-0.239683	FALSE
VCIP1_MOUSE	(Q8CDG3) Deubiquitinating protein VCIP135	-0.093879	0.21661	-0.209228	-0.253257	-0.172994	-0.0649175	0.0313952	0.261832	0.413594	0.146655	0.347099	0.144418	0.707973	0.222462	FALSE
PDIA3_MOUSE	(P27773) Protein disulfide-isomerase A3	-0.0908029	0.0524159	-0.407364	0.233888	-0.28279	-0.227692	-0.696658	-0.236164	-0.630394	-0.101598	-0.120294	0.144935	0.707973	-0.274976	FALSE
ENPL_MOUSE	(P08113) Endoplasmin	-0.0709665	0.077243	-0.422752	0.243669	-0.373327	-0.202572	-0.691989	-0.184425	-0.614845	-0.140826	-0.093879	0.145176	0.707973	-0.285636	FALSE
E41L2_MOUSE	(O70318) Band 4.1-like protein 2	0.137504	-0.114035	-0.106249	-0.077041	-0.351074	-0.0350469	-0.1976	-0.0424568	-0.163268	-0.195946	-0.142417	0.145873	0.707973	-0.12116	FALSE
GLU2B_MOUSE	(O08795) Glucosidase 2 subunit beta	-0.0603973	0.0976108	-0.24127	0.285698	0.0243197	-0.0679388	-0.394032	-0.103147	-0.567041	-0.215915	-0.134477	0.145939	0.707973	-0.228729	FALSE
DPYL3_MOUSE	(Q62188) Dihydropyrimidinase-related protein 3	-0.0846703	-0.16004	-0.0365259	-0.26708	-0.0558912	0.0758749	-0.182786	-0.205896	0.0881416	-0.013043	0.137504	0.146306	0.707973	0.11478	FALSE
B3GA3_MOUSE	(P58158) Galactosylgalactosylxylosylprotein 3-beta-glucuronosyltransferase 3	-0.0664274	0.303342	-0.21927	0.440421	-0.0439433	-0.0649175	0.0745054	0.00144197	-0.935117	-0.148801	-0.405451	0.146365	0.707973	-0.331985	FALSE
PHYIP_MOUSE	(Q8K0S0) Phytanoyl-CoA hydroxylase-interacting protein	-0.0247367	-0.0816138	-0.0232698	-0.0908029	0.164786	0.041243	-0.0513992	0.0071955	0.0579701	-0.164884	0.0370307	0.146574	0.707973	0.0682404	FALSE
OSBL1_MOUSE	(Q91XL9) Oxysterol-binding protein-related protein 1	0.169925	0.104337	-0.00723157	-0.0203404	0.183963	0.0867838	0.0799754	0.115033	0.288063	0.045443	0.334568	0.147133	0.707973	0.100303	FALSE
GLSK_MOUSE	(D3Z7P3) Glutaminase kidney isoform, mitochondrial	0.0593553	0.219091	-0.110916	-0.153607	-0.440263	-0.293359	0.0496308	-0.0528949	-0.145605	-0.0619024	-0.261881	0.147595	0.707973	-0.175806	FALSE
DLDH_MOUSE	(O08749) Dihydrolipoyl dehydrogenase, mitochondrial	-0.0350469	0.415759	-0.0262051	-0.281036	-0.459973	-0.192645	-0.176251	-0.632629	0.125651	-0.239566	-0.312939	0.148368	0.707973	-0.288132	FALSE
SYN2_MOUSE	(Q64332) Synapsin-2	-0.0831412	-0.217591	0.119024	-0.0528949	0.120352	0.0854247	0.360645	0.119024	-0.0603973	0.0538064	-0.0785637	0.148613	0.707973	0.144407	FALSE
GNA13_MOUSE	(P27601) Guanine nucleotide-binding protein subunit alpha-13	0.187768	-0.0350469	0.0593553	-0.0985055	0.195348	-0.0365259	-0.0144996	0.282143	0.178874	0.21661	0.284514	0.149791	0.707973	0.129674	FALSE
GDIA_MOUSE	(P50396) Rab GDP dissociation inhibitor alpha	0.0313952	0.0908534	0.0976108	0.151859	0.0949116	0.147958	0.0579701	-0.0954196	0.0482362	0.0257376	-0.106249	0.150001	0.707973	-0.0681947	FALSE
ASGL1_MOUSE	(Q8C0M9) Isoaspartyl peptidase/L-asparaginase	-0.0573917	0.9855	0.16092	0.482332	-0.0603973	0.16092	0.00432161	-0.137648	0.0186342	-0.155213	-0.0694519	0.154957	0.707973	-0.426959	FALSE
SYG_MOUSE	(Q9CZD3) Glycine--tRNA ligase	-0.0144996	0.304511	-0.0394883	-0.107803	0.200379	0.0143553	0.045443	0.408168	0.157044	0.282143	0.399445	0.155461	0.707973	0.179602	FALSE
VTI1B_MOUSE	(O88384) Vesicle transport through interaction with t-SNAREs homolog 1B	0.146655	-0.011588	-0.304006	0.115033	-0.0892673	-0.147202	-0.289827	0.0922074	-0.584241	-0.293359	-0.24127	0.15552	0.707973	-0.208375	FALSE
MK03_MOUSE	(Q63844) Mitogen-activated protein kinase 3	-0.0409718	-0.093879	-0.00868224	0.0717627	1.23327	0.0114956	0.124328	0.872632	-0.0877334	-0.00578235	-0.00578235	0.155677	0.707973	0.324004	FALSE
S10AD_MOUSE	(P97352) Protein S100-A13	-0.258425	-0.182786	-0.011588	-0.0291463	-0.0969617	-0.189351	-0.0499049	-0.37707	-0.336428	-0.375197	-0.291592	0.155969	0.707973	-0.124729	FALSE
L1CAM_MOUSE	(P11627) Neural cell adhesion molecule L1	0.0129262	-0.118727	-0.00144342	0.217851	0.0731347	0.123004	-0.200913	-0.349235	-0.494109	0.100305	-0.33825	0.156869	0.707973	-0.182804	FALSE
CA2D2_MOUSE	(Q6PHS9) Voltage-dependent calcium channel subunit alpha-2/delta-2	-0.00288828	-0.0831412	0.261832	0.0257376	-0.018878	0.116365	-0.296899	0.171207	-0.347399	-0.155213	-0.302226	0.157217	0.707973	-0.169391	FALSE
EFGM_MOUSE	(Q8K0D5) Elongation factor G, mitochondrial	-0.112475	-0.0892673	-0.0291463	0.0370307	-0.140826	-0.212568	0.0976108	-0.224317	-0.0484122	-0.142417	-0.465938	0.157975	0.707973	-0.113945	FALSE
ADT1_MOUSE	(P48962) ADP/ATP translocase 1	0.22033	0.0745054	-0.265345	0.169925	-0.696658	-0.189351	-0.234465	0.0703893	-0.181149	0.0949116	-0.131313	0.158705	0.707973	-0.230945	FALSE
PGM1_MOUSE	(Q9D0F9) Phosphoglucomutase-1	0.0200577	-0.018878	0.138814	0.0731347	0.105678	0.0621217	-0.013043	0.202888	0.207893	0.158337	0.149259	0.159047	0.707973	0.0714512	FALSE
ABCB8_MOUSE	(Q9CXJ4) ATP-binding cassette sub-family B member 8, mitochondrial	-0.0785637	0.141433	-0.0785637	0.159629	-0.275786	-0.131313	0.112367	-0.0985055	-0.152003	-0.07552	-0.0320936	0.159241	0.707973	-0.129249	FALSE
RHOA_MOUSE	(Q9QUI0) Transforming protein RhoA	0.00432161	-0.00723157	-0.248108	-0.0306192	0.200379	-0.103147	-0.145605	0.173767	-0.00433459	0.0299829	0.27858	0.159544	0.707973	0.131784	FALSE
CALR_MOUSE	(P14211) Calreticulin	-0.158429	0.00432161	-0.475936	0.117695	-0.321928	-0.1976	-0.846843	-0.222633	-0.746616	-0.229382	-0.177882	0.159687	0.707973	-0.263753	FALSE
SEPT3_MOUSE	(Q9Z1S5) Neuronal-specific septin-3	0.0342157	-0.209228	0.195348	-0.529073	0.181421	0.353888	0.137504	-0.232769	0.481299	0.0894982	0.180148	0.16019	0.707973	0.297325	FALSE
SEPT6_MOUSE	(Q9R1T4) Septin-6	0.350497	-0.0694519	0.227741	-0.488026	0.595504	0.463622	0.516015	0.0690147	0.290424	0.267835	0.244887	0.161348	0.707973	0.344425	FALSE
EIF3A_MOUSE	(P23116) Eukaryotic translation initiation factor 3 subunit A	0.336855	0.57628	-0.120294	0.402722	0.292782	-0.100051	-0.161653	-0.046921	0.0313952	0.0703893	0.0854247	0.161361	0.707973	-0.27441	FALSE
PP2BA_MOUSE	(P63328) Serine/threonine-protein phosphatase 2B catalytic subunit alpha isoform	-0.0159576	-0.0954196	-0.046921	-0.305788	-0.237864	0.117695	-0.128156	-0.0709665	0.181421	0.211635	0.107018	0.161984	0.707973	0.141848	FALSE
CMGA_MOUSE	(P26339) Chromogranin-A	0.0662614	0.120352	-0.207561	0.107018	-0.0291463	-0.0320936	-0.516636	-0.134477	-0.0816138	-0.117161	-0.0439433	0.162044	0.707973	-0.157956	FALSE
CALX_MOUSE	(P35564) Calnexin	-0.100051	0.0840643	-0.265345	0.169925	-0.0800879	-0.136062	-0.465938	-0.179515	-0.465938	-0.0877334	-0.0954196	0.162254	0.707973	-0.187962	FALSE
AUXI_MOUSE	(Q80TZ3) Putative tyrosine-protein phosphatase auxilin	0.0799754	-0.0499049	0.0922074	-0.15682	0.199123	-0.00144342	0.194087	0.100305	0.168642	0.00575927	0.0482362	0.162632	0.707973	0.110737	FALSE
RAB5A_MOUSE	(Q9CQD1) Ras-related protein Rab-5A	0.0593553	0.181421	-0.0634092	-0.117161	0.077243	-0.0573917	-0.0694519	-0.163268	-0.155213	-0.150401	-0.260152	0.163164	0.707973	-0.126285	FALSE
G3P_MOUSE	(P16858) Glyceraldehyde-3-phosphate dehydrogenase	0.0200577	-0.284546	0.051024	-0.354759	-0.0877334	0.0468403	-0.142417	0.045443	0.303342	0.168642	0.0229004	0.165231	0.707973	0.193058	FALSE
1433T_MOUSE	(P68254) 14-3-3 protein theta	0.107018	-0.261881	-0.121863	-0.202572	0.0172093	0.0482362	-0.0424568	0.0593553	0.0854247	-0.0619024	0.0799754	0.166962	0.707973	0.146373	FALSE
CNTN2_MOUSE	(Q61330) Contactin-2	0.0676387	0.0214797	-0.164884	-0.330973	0.153157	-0.14401	0.428678	0	0.0635029	0.0731347	-0.0380063	0.167363	0.707973	0.178321	FALSE
TAGL3_MOUSE	(Q9R1Q8) Transgelin-3	-0.114035	-0.0454314	-0.120294	0.221568	-0.378944	-0.132894	-0.330973	-0.360305	-0.182786	0.102994	0.0229004	0.167523	0.707973	-0.165453	FALSE
AAK1_MOUSE	(Q3UHJ0) AP2-associated protein kinase 1	0.0758749	-0.16004	-0.00868224	-0.356606	0.219091	-0.0394883	0.051024	-0.12658	0.227741	0.0538064	0.0468403	0.168059	0.707973	0.17414	FALSE
TBB1_MOUSE	(A2AQ07) Tubulin beta-1 chain	0.015783	0.0496308	-0.0218044	-0.14401	0.696884	0.0440443	-0.0365259	0.214125	0.0200577	-0.0558912	0.0840643	0.168642	0.707973	0.163209	FALSE
RHOB_MOUSE	(P62746) Rho-related GTP-binding protein RhoB	0.00432161	-0.00433459	-0.231075	0.0214797	0.175045	-0.110916	-0.137648	0.238787	0.0257376	0.0607392	0.304511	0.168963	0.707973	0.131867	FALSE
THIO_MOUSE	(P10639) Thioredoxin	0.39835	0.362891	-0.0558912	0.140124	-0.0619024	-0.150401	0.0621217	0.0593553	0.0496308	0.226509	-0.046921	0.169208	0.707973	-0.191598	FALSE
SYT2_MOUSE	(P46097) Synaptotagmin-2	0.185232	-0.456009	-0.018878	-0.550043	-0.027675	0.0607392	-0.0174171	0.125651	0.293959	0.0935602	0.196607	0.170753	0.707973	0.313556	FALSE
SC6A1_MOUSE	(P31648) Sodium- and chloride-dependent GABA transporter 1	-0.15682	0.0551957	-0.00288828	0.436162	-0.254978	0.0551957	-0.129734	-0.1976	-0.00288828	-0.318326	-0.147202	0.172545	0.707973	-0.225131	FALSE
RS7_MOUSE	(P62082) 40S ribosomal protein S7	0.0922074	-0.0203404	0.0894982	0.187768	0.390668	0.0648829	1.01792	0.660837	-0.428566	0.212881	0.657183	0.172735	0.707973	0.280689	FALSE
KCC2D_MOUSE	(Q6PHZ2) Calcium/calmodulin-dependent protein kinase type II subunit delta	0.0313952	-0.438307	-0.00433459	-0.115597	-0.0846703	0.197865	1.14209	-0.137648	-0.0380063	-0.0394883	0.109695	0.172864	0.707973	0.295973	FALSE
PLD3_MOUSE	(O35405) Phospholipase D3	-0.184425	0.157044	-0.312939	0.155749	-0.103147	-0.227692	-0.161653	-0.0365259	-0.780909	-0.369595	-0.268817	0.173251	0.707973	-0.232191	FALSE
B2L13_MOUSE	(P59017) Bcl-2-like protein 13	0.0257376	-0.171368	-0.027675	-0.103147	-0.224317	-0.242977	0.0607392	-0.093879	-0.106249	-0.251539	-0.286304	0.173825	0.707973	-0.0943906	FALSE
TIPRL_MOUSE	(Q8BH58) TIP41-like protein	-0.1976	-0.0218044	-0.21424	-0.434403	-0.307573	-0.145605	0.00144197	0.119024	-0.0218044	-0.14401	0.0799754	0.175101	0.707973	0.157219	FALSE
ADCY5_MOUSE	(P84309) Adenylate cyclase type 5	0.128293	0.0071955	0.0086303	-0.110916	0.0758749	0.121679	0.0299829	0.22033	0.107018	0.126973	-0.00578235	0.176886	0.707973	0.0882813	FALSE
ADA22_MOUSE	(Q9R1V6) Disintegrin and metalloproteinase domain-containing protein 22	-0.0499049	-0.0846703	0.0745054	0.015783	0.0524159	0.171207	-0.140826	0.284514	0.00288251	0.202888	0.015783	0.176925	0.707973	0.0951952	FALSE
PDK2_MOUSE	(Q9JK42) [Pyruvate dehydrogenase [lipoamide]] kinase isozyme 2, mitochondrial	-0.0499049	0.201634	-0.018878	-0.14401	-0.0513992	-0.330973	0.133564	-0.204233	-0.110916	-0.134477	-0.323733	0.177199	0.707973	-0.143234	FALSE
SUCB1_MOUSE	(Q9Z2I9) Succinyl-CoA ligase [ADP-forming] subunit beta, mitochondrial	-0.136062	-0.112475	-0.0923402	-0.013043	-0.409278	0.0370307	-0.101598	-0.375197	-0.0985055	-0.0877334	-0.304006	0.17878	0.707973	-0.102847	FALSE
CBPD_MOUSE	(O89001) Carboxypeptidase D	0.107018	0.309176	-0.307573	-0.0218044	0.00288251	-0.231075	-0.39973	0.119024	-0.659723	-0.158429	-0.229382	0.178932	0.707973	-0.244052	FALSE
AINX_MOUSE	(P46660) Alpha-internexin	-0.139236	0.196607	0	0.0827026	-0.0985055	-0.131313	-0.307573	-0.0800879	-0.199255	0.238787	-0.168123	0.179266	0.707973	-0.1416	FALSE
PLBL2_MOUSE	(Q3TCN2) Putative phospholipase B-like 2	-0.390245	0.105678	-0.323733	0.0662614	-0.320126	-0.434403	-0.380822	-0.0877334	-0.691989	-0.2567	-0.384584	0.179904	0.707973	-0.229684	FALSE
ARSA_MOUSE	(P50428) Arylsulfatase A	-0.424688	-0.0892673	-0.481969	0.146655	-0.236164	-0.354759	-0.405451	-0.195946	-0.854649	-0.614845	-0.694321	0.182167	0.707973	-0.267131	FALSE
UCRI_MOUSE	(Q9CR68) Cytochrome b-c1 complex subunit Rieske, mitochondrial	-0.21927	0.54498	-0.112475	-0.0262051	-0.510457	-0.343732	-0.131313	-0.117161	-0.343732	-0.0588937	-0.226004	0.184039	0.707973	-0.294085	TRUE
4F2_MOUSE	(P10852) 4F2 cell-surface antigen heavy chain	-0.0247367	-0.226004	-0.046921	-0.155213	0.219091	0.326537	-0.227692	0.133564	-0.226004	0.0468403	-0.106249	0.184078	0.707973	0.136945	FALSE
LDHA_MOUSE	(P06151) L-lactate dehydrogenase A chain	0.100305	-0.136062	-0.0800879	-0.284546	-0.0619024	-0.0954196	0.107018	0	0.173767	-0.00144342	0.15056	0.184415	0.707973	0.139038	FALSE
ODO1_MOUSE	(Q60597) 2-oxoglutarate dehydrogenase, mitochondrial	-0.0573917	0.0813396	0.00575927	0.0100637	-0.150401	-0.104697	0.124328	-0.107803	0.0976108	-0.123434	-0.28279	0.184685	0.707973	-0.0881122	FALSE
EP15R_MOUSE	(Q60902) Epidermal growth factor receptor substrate 15-like 1	-0.00144342	0.112367	-0.0409718	0.104337	0.209141	0.172488	0.0648829	0.271426	0.0271541	0.0949116	0.0086303	0.184868	0.707973	0.0776614	FALSE
PDIA6_MOUSE	(Q922R8) Protein disulfide-isomerase A6	-0.164884	-0.121863	-0.436354	0.343692	-0.14401	-0.33825	-0.680382	-0.204233	-0.852042	-0.320126	-0.163268	0.18506	0.707973	-0.291192	FALSE
EFHD2_MOUSE	(Q9D8Y0) EF-hand domain-containing protein D2	-0.14401	-0.205896	-0.0380063	0.0593553	-0.621488	-0.341903	0.0071955	-0.461959	-0.00433459	-0.182786	-0.0649175	0.185553	0.707973	-0.15646	FALSE
RCN1_MOUSE	(Q05186) Reticulocalbin-1	-0.192645	-0.0740006	-0.253257	0.282143	0.00432161	-0.311148	-0.401635	-0.100051	-0.588574	-0.364013	-0.16004	0.185578	0.707973	-0.215009	FALSE
SAHH2_MOUSE	(Q80SW1) Putative adenosylhomocysteinase 2	-0.0558912	-0.0159576	-0.0513992	-0.171368	-0.286304	-0.00144342	-0.312939	-0.16004	-0.0709665	-0.161653	-0.0740006	0.186315	0.707973	-0.0788242	FALSE
SRCN1_MOUSE	(Q9QWI6) SRC kinase signaling inhibitor 1	0.183963	-0.232769	-0.027675	0.0328061	0.140124	0.0172093	0.809826	0.136191	-0.110916	0.23634	0.10165	0.187525	0.707973	0.200979	FALSE
CLCA_MOUSE	(O08585) Clathrin light chain A	-0.086201	-0.166503	0.124328	-0.0877334	-0.0603973	0.159629	0.209141	-0.093879	0.105678	0.112367	-0.0174171	0.188013	0.707973	0.11333	FALSE
KAD2_MOUSE	(Q9WTP6) Adenylate kinase 2, mitochondrial	-0.272297	-0.300448	-0.189351	-0.258425	-0.251539	-0.046921	-0.16004	-0.37707	0.356144	-0.168123	-0.204233	0.188181	0.707973	0.133447	FALSE
PSA1_MOUSE	(Q9R1P4) Proteasome subunit alpha type-1	0.299831	0.263034	0.329985	-0.0528949	0.369606	0.361768	0.537048	0.0745054	0.344828	0.316146	0.597412	0.188683	0.707973	0.161628	FALSE
GRP78_MOUSE	(P20029) 78 kDa glucose-regulated protein	-0.112475	-0.0365259	-0.351074	0.168642	-0.147202	-0.199255	-0.488026	-0.184425	-0.545824	-0.190997	-0.147202	0.188819	0.707973	-0.188989	FALSE
TBC24_MOUSE	(Q3UUG6) TBC1 domain family member 24	0.00432161	-0.289827	-0.134477	-0.131313	-0.123434	0.205393	-0.246395	-0.192645	0.0703893	0.105678	0.108357	0.188974	0.707973	0.127444	FALSE
NSF_MOUSE	(P46460) Vesicle-fusing ATPase	0.00288251	-0.0335695	-0.0380063	-0.0619024	-0.0247367	0.158337	-0.16004	0.0962619	-0.027675	0.102994	0.0607392	0.189567	0.707973	0.0620604	FALSE
UBP5_MOUSE	(P56399) Ubiquitin carboxyl-terminal hydrolase 5	0.0524159	0.0129262	0.0635029	-0.120294	0.124328	0.0071955	0.0676387	0.077243	0.183963	0.00575927	0.0635029	0.190343	0.707973	0.0735238	FALSE
HYOU1_MOUSE	(Q9JKR6) Hypoxia up-regulated protein 1	-0.16004	-0.0892673	-0.411195	0.180148	-0.14401	-0.327348	-0.628162	-0.0923402	-0.687335	-0.304006	-0.202572	0.190612	0.707973	-0.220736	FALSE
PPTC7_MOUSE	(Q6NVE9) Protein phosphatase PTC7 homolog	-0.07552	0.465713	0.211635	0.211635	0.334568	0.0172093	0.23634	-0.253257	0.0731347	-0.251539	-0.177882	0.190812	0.707973	-0.206427	FALSE
DLG2_MOUSE	(Q91XM9) Disks large homolog 2	-0.0320936	-0.296899	-0.0439433	-0.39973	-0.132894	-0.163268	0.0840643	-0.0558912	-0.0816138	-0.0409718	0.136191	0.191019	0.707973	0.156826	FALSE
RAB35_MOUSE	(Q6PHN9) Ras-related protein Rab-35	0.0086303	-0.382702	-0.07552	-0.215915	-0.00144342	-0.07552	-0.0380063	-0.0831412	0.015783	0.0976108	-0.0785637	0.193897	0.715395	0.143051	FALSE
KCC2G_MOUSE	(Q923T9) Calcium/calmodulin-dependent protein kinase type II subunit gamma	0.16221	-0.516636	-0.0513992	-0.117161	-0.0365259	0.226509	1.27441	-0.0649175	-0.0247367	-0.0350469	0.0243197	0.194371	0.715395	0.325605	FALSE
RAB4B_MOUSE	(Q91ZR1) Ras-related protein Rab-4B	-0.0101344	-0.0740006	-0.0101344	-0.16004	0.0648829	-0.0558912	0.0482362	0.00575927	-0.0513992	-0.027675	-0.00723157	0.195052	0.715417	0.0602462	FALSE
ISCA2_MOUSE	(Q9DCB8) Iron-sulfur cluster assembly 2 homolog, mitochondrial	-0.0484122	0.0129262	0.0867838	-0.192645	-0.296899	-0.356606	0.120352	-0.103147	-0.011588	-0.229382	-0.224317	0.196649	0.716956	-0.122033	FALSE
S12A5_MOUSE	(Q91V14) Solute carrier family 12 member 5	-0.046921	-0.172994	-0.0499049	-0.115597	0.168642	-0.0985055	-0.190997	0.0285692	-0.123434	0.0635029	0.0214797	0.197474	0.716956	0.0776768	FALSE
UBE3A_MOUSE	(O08759) Ubiquitin-protein ligase E3A	0.120352	0.212881	0.111031	-0.0649175	0.263034	0.0086303	0.934328	0.138814	0.178874	0.100305	0.311503	0.197501	0.716956	0.181662	FALSE
K6PP_MOUSE	(Q9WUA3) 6-phosphofructokinase type C	-0.018878	-0.265345	0.149259	-0.21927	0.0703893	0.136191	0.0538064	-0.512514	0.712816	0.0827026	0.567545	0.198995	0.718592	0.247264	FALSE
PP2BB_MOUSE	(P48453) Serine/threonine-protein phosphatase 2B catalytic subunit beta isoform	0.0579701	-0.0203404	-0.0694519	-0.275786	-0.163268	0.128293	-0.0923402	0.108357	0.168642	0.109695	0.0717627	0.199307	0.718592	0.124208	FALSE
CHCH6_MOUSE	(Q91VN4) Coiled-coil-helix-coiled-coil-helix domain-containing protein 6, mitochondrial	0.154454	0.0186342	-0.0603973	0.0867838	-0.678072	-1.15521	0.336855	-0.0174171	-0.011588	-0.0740006	-0.013043	0.200123	0.719084	-0.280223	FALSE
SH3G2_MOUSE	(Q62420) Endophilin-A1	0.10165	-0.0800879	0.0496308	-0.251539	-0.0291463	0.173767	0.104337	0.0384362	0.192825	0.0565835	0.0468403	0.203762	0.726455	0.128464	FALSE
VATH_MOUSE	(Q8BVE3) V-type proton ATPase subunit H	-0.0908029	2.31325	0.120352	1.62106	0.0565835	0.0786098	0.120352	0.0745054	0.196607	-0.164884	-0.0203404	0.204228	0.726455	-0.942186	FALSE
FA49B_MOUSE	(Q921M7) Protein FAM49B	0.0271541	0.120352	-0.171368	-0.150401	-0.00288828	-0.103147	-0.046921	0.182692	0.104337	0.14274	0.288063	0.204589	0.726455	0.124262	FALSE
K6PL_MOUSE	(P12382) 6-phosphofructokinase, liver type	0.0593553	0.379621	0.0813396	0.0551957	0.344828	0.396159	0.319618	0.237564	0.182692	0.140124	0.289244	0.204923	0.726455	0.129012	FALSE
GNA11_MOUSE	(P21278) Guanine nucleotide-binding protein subunit alpha-11	-0.0649175	-0.150401	-0.0262051	-0.295128	-0.0709665	-0.0499049	-0.153607	-0.0247367	-0.00723157	0.077243	-0.027675	0.2056	0.726455	0.0974659	FALSE
RALB_MOUSE	(Q9JIW9) Ras-related protein Ral-B	0.0243197	-0.0740006	-0.0454314	-0.0694519	-0.128156	0.0690147	-0.115597	0.608809	0.868687	0	-0.0877334	0.207056	0.729168	0.214716	FALSE
PSMD3_MOUSE	(P14685) 26S proteasome non-ATPase regulatory subunit 3	0.0426443	0.225275	0.0243197	0.16221	0.0648829	0.0384362	0.00144197	-0.0159576	0.126973	-0.0380063	0.0690147	0.207894	0.729543	-0.0783573	FALSE
RPGF2_MOUSE	(Q8CHG7) Rap guanine nucleotide exchange factor 2	0.045443	0.124328	0.00288251	-0.0694519	0.0881416	-0.0174171	0.157044	-0.0409718	0.129613	0.181421	0.207893	0.20938	0.729543	0.0750171	FALSE
MY18A_MOUSE	(Q9JMH9) Unconventional myosin-XVIIIa	-0.00288828	0.130931	0.159629	-0.0543923	-0.28279	-0.347399	-0.0320936	-0.0679388	-0.0380063	0.171207	0.15056	0.209772	0.729543	-0.1221	FALSE
HS12A_MOUSE	(Q8K0U4) Heat shock 70 kDa protein 12A	-0.152003	-0.0424568	0.10165	-0.104697	-0.0174171	0.189034	-0.018878	0.0370307	-0.0409718	0.077243	0.0621217	0.210387	0.729543	0.0905429	FALSE
VATG1_MOUSE	(Q9CR51) V-type proton ATPase subunit G 1	-0.013043	-0.0247367	0.115033	0.121679	0.0398403	0.176323	0.0565835	0.116365	0.215368	0.0867838	0.119024	0.210878	0.729543	0.0660223	FALSE
MBLC2_MOUSE	(Q8BL86) Metallo-beta-lactamase domain-containing protein 2	0.0071955	0.0143553	-0.0174171	0.202888	0.0114956	-0.0558912	-0.093879	-0.0320936	0.0229004	-0.0831412	0.0243197	0.211292	0.729543	-0.0812253	FALSE
KAP0_MOUSE	(Q9DBC7) cAMP-dependent protein kinase type I-alpha regulatory subunit	0.15056	0.104337	-0.533242	-0.0664274	0.177599	0.0799754	0.108357	0.0922074	0.133564	0.283329	0.248535	0.212351	0.730819	0.246703	FALSE
RAB1A_MOUSE	(P62821) Ras-related protein Rab-1A	-0.166503	-0.41889	-0.027675	-0.234465	0.015783	-0.0247367	0.0257376	-0.265345	-0.114035	-0.0528949	-0.150401	0.213468	0.732286	0.131041	FALSE
TIM50_MOUSE	(Q9D880) Mitochondrial import inner membrane translocase subunit TIM50	-0.0291463	0.200379	-0.277534	0.403813	-0.351074	-0.181149	-0.168123	0.0468403	-0.106249	-0.0424568	-0.300448	0.215286	0.736139	-0.231901	FALSE
ULA1_MOUSE	(Q8VBW6) NEDD8-activating enzyme E1 regulatory subunit	-0.334607	-0.140826	0.100305	-0.134477	-0.16004	-0.013043	-0.286304	-0.664288	-0.405451	-0.432455	-0.0908029	0.216931	0.73938	-0.165797	FALSE
SYYC_MOUSE	(Q91WQ3) Tyrosine--tRNA ligase, cytoplasmic	-0.0634092	0.0827026	-0.0394883	0.109695	0.16221	0.138814	0.0129262	0.0538064	0.125651	0.0635029	0.0799754	0.218342	0.740933	0.0686088	FALSE
RTN4_MOUSE	(Q99P72) Reticulon-4	-0.0365259	0.0243197	0.176323	0.0496308	0.0703893	0.0538064	-0.205896	-0.164884	-0.0923402	0.0922074	0.0257376	0.220607	0.740933	-0.0850054	FALSE
PCCB_MOUSE	(Q99MN9) Propionyl-CoA carboxylase beta chain, mitochondrial	-0.103147	-0.114035	0.0676387	-0.131313	-0.187707	-0.155213	0.0962619	-0.28279	-0.0306192	-0.237864	-0.413115	0.221629	0.740933	-0.102792	FALSE
PCP4_MOUSE	(P63054) Purkinje cell protein 4	-0.0439433	-0.114035	0.0976108	-0.112475	-0.163268	-0.0588937	-0.161653	-0.103147	-0.0159576	-0.171368	-0.176251	0.222262	0.740933	-0.0782949	FALSE
HNRPK_MOUSE	(P61979) Heterogeneous nuclear ribonucleoprotein K	-0.215915	0.133564	-0.106249	0.477159	0.041243	-0.0247367	-0.375197	-0.107803	-0.465938	-0.174621	-0.0664274	0.223945	0.740933	-0.23978	FALSE
CN37_MOUSE	(P16330) 2',3'-cyclic-nucleotide 3'-phosphodiesterase	0.0745054	0.169925	-0.0969617	-0.24127	-0.26708	0.0313952	-0.612637	-0.0454314	-0.077041	-0.0484122	-0.293359	0.22498	0.740933	-0.164059	FALSE
DLG1_MOUSE	(Q811D0) Disks large homolog 1	0.0214797	-0.0365259	-0.0499049	-0.0724828	0.0593553	-0.0528949	0.454176	0.0356239	-0.125006	0.107018	-0.0306192	0.226378	0.740933	0.0983089	FALSE
DYHC1_MOUSE	(Q9JHU4) Cytoplasmic dynein 1 heavy chain 1	0.0129262	0.0690147	0.0186342	-0.0291463	0.0922074	0.134878	-0.0679388	0.0370307	0.0745054	0.0976108	0.045443	0.22689	0.740933	0.0412481	FALSE
S10A6_MOUSE	(P14069) Protein S100-A6	-0.117161	0.0935602	0.0962619	-0.179515	-0.104697	-0.33825	0.0935602	0.158337	-0.411195	-0.37146	-0.227692	0.228265	0.740933	-0.144915	FALSE
CAPS1_MOUSE	(Q80TJ1) Calcium-dependent secretion activator 1	0.144046	0.820485	-0.0499049	0.190299	-0.163268	0.0229004	-0.110916	0.0200577	0.0989585	0.0172093	0.0607392	0.229867	0.740933	-0.283991	FALSE
RAB3C_MOUSE	(P62823) Ras-related protein Rab-3C	0.0813396	-0.535332	0.0086303	-0.190997	0.0935602	0.0384362	0.015783	0.14274	0	0.0257376	0.0186342	0.230865	0.740933	0.206931	FALSE
MMSA_MOUSE	(Q9EQ20) Methylmalonate-semialdehyde dehydrogenase [acylating], mitochondrial	-0.0558912	-0.0831412	0.136191	-0.147202	0.0840643	0.120352	0.370722	-0.179515	0.337996	0.0129262	-0.114035	0.232018	0.740933	0.12787	FALSE
KCY_MOUSE	(Q9DBP5) UMP-CMP kinase	-0.131313	0.480265	0.00288251	-0.0969617	-0.0513992	-0.0724828	-0.224317	-0.397828	0.0468403	-0.168123	-0.187707	0.232218	0.740933	-0.214435	FALSE
S4A10_MOUSE	(Q5DTL9) Sodium-driven chloride bicarbonate exchanger	0.0468403	-0.137648	0.117695	-0.0588937	-0.0528949	-0.137648	-0.176251	0.0745054	-0.177882	-0.0394883	-0.176251	0.232411	0.740933	-0.0899854	FALSE
TOM6_MOUSE	(Q9CQN3) Mitochondrial import receptor subunit TOM6 homolog	0.0482362	1.21661	-0.110916	1.02715	-0.189351	-1.0862	0.811471	0.295135	-0.0144996	0.0524159	0.185232	0.232483	0.740933	-0.537528	FALSE
GFAP_MOUSE	(P03995) Glial fibrillary acidic protein	-0.0380063	0.172488	-0.0528949	0.297485	-0.244685	-0.438307	0.647084	-0.334607	-0.139236	-0.101598	-0.14401	0.233169	0.740933	-0.202676	FALSE
DYN1_MOUSE	(P39053) Dynamin-1	0.045443	0.0949116	0.10165	-0.132894	0.134878	0.10165	0.163499	0.0854247	0.0854247	0.0827026	0.109695	0.23345	0.740933	0.0817615	FALSE
YKT6_MOUSE	(Q9CQW1) Synaptobrevin homolog YKT6	-0.0573917	-0.229382	-0.046921	-0.314733	-0.172994	0.015783	-0.0908029	-0.320126	0.126973	0.0881416	0.0229004	0.234699	0.740933	0.114946	FALSE
EPN1_MOUSE	(Q80VP1) Epsin-1	0.0370307	0.349365	0.104337	0.212881	0.319618	0.126973	0.196607	0.285698	0.421156	0.350497	0.267835	0.234825	0.740933	0.105294	FALSE
TSN7_MOUSE	(Q62283) Tetraspanin-7	-0.093879	-0.226004	-0.246395	-0.237864	-0.00723157	-0.186065	0.328836	0.377401	-0.343732	-0.254978	-0.261881	0.235565	0.740933	0.151371	FALSE
SFXN1_MOUSE	(Q99JR1) Sideroflexin-1	0.0881416	0.045443	-0.0144996	0.166073	-0.013043	-0.207561	0.0356239	0.0976108	-0.140826	0.0976108	0.0949116	0.237665	0.740933	-0.0763855	FALSE
RPN1_MOUSE	(Q91YQ5) Dolichyl-diphosphooligosaccharide--protein glycosyltransferase subunit 1	-0.0908029	-0.00723157	-0.367732	0.463622	-0.150401	-0.136062	-0.54372	-0.200913	-0.701342	-0.120294	-0.011588	0.237667	0.740933	-0.265795	FALSE
DHB4_MOUSE	(P51660) Peroxisomal multifunctional enzyme type 2	0.200379	0.250962	-0.115597	0.197865	0.0962619	-0.192645	0.0496308	-0.0291463	-0.0499049	0.0731347	0.0989585	0.238022	0.740933	-0.126789	FALSE
EEA1_MOUSE	(Q8BL66) Early endosome antigen 1	0.0496308	-0.332789	-0.103147	-0.32916	-0.0335695	-0.0513992	1.22219	-0.21424	0.1137	-0.21927	-0.163268	0.239251	0.740933	0.272315	FALSE
AT2A2_MOUSE	(O55143) Sarcoplasmic/endoplasmic reticulum calcium ATPase 2	-0.00868224	0.00144197	-0.15682	-0.0454314	-0.121863	-0.134477	-0.226004	-0.0144996	-0.234465	-0.0424568	-0.0365259	0.239515	0.740933	-0.063383	FALSE
LYRIC_MOUSE	(Q80WJ7) Protein LYRIC	-0.0588937	-0.0877334	-0.212568	0.437228	-0.152003	-0.26708	-0.395929	0.0813396	-0.888969	-0.0740006	0.112367	0.241649	0.740933	-0.245833	FALSE
USP9X_MOUSE	(P70398) Probable ubiquitin carboxyl-terminal hydrolase FAF-X	-0.169745	-0.018878	-0.129734	-0.0877334	0.0676387	-0.164884	-0.0513992	-0.123434	0.0398403	-0.0365259	-0.0454314	0.242309	0.740933	0.0566374	FALSE
EXOG_MOUSE	(Q8C163) Nuclease EXOG, mitochondrial	0.261832	0.045443	-0.192645	0.27858	-0.0800879	-0.163268	0.100305	-0.117161	-0.018878	-0.0499049	-0.110916	0.243485	0.740933	-0.161147	FALSE
2ABG_MOUSE	(Q8BG02) Serine/threonine-protein phosphatase 2A 55 kDa regulatory subunit B gamma isoform	0.0186342	0.0524159	-0.0454314	0.124328	0.347099	0.0426443	0.92524	0.117695	-0.0291463	0.0243197	0.0229004	0.244169	0.740933	0.169764	FALSE
SC23A_MOUSE	(Q01405) Protein transport protein Sec23A	0.232661	0.24245	-0.0969617	0.0440443	-0.0528949	-0.0350469	-0.120294	0.253384	-0.254978	0.0426443	0	0.2445	0.740933	-0.129432	FALSE
TKT_MOUSE	(P40142) Transketolase	0.469886	0.318461	-0.0923402	-0.248108	-0.293359	0.0114956	-0.318326	-0.0709665	-0.0816138	-0.226004	0.041243	0.244728	0.740933	-0.245908	FALSE
KCC2A_MOUSE	(P11798) Calcium/calmodulin-dependent protein kinase type II subunit alpha	0.291604	-0.459973	0.051024	0.0100637	-0.0484122	0.153157	1.62714	0.104337	0.0962619	0.117695	0.119024	0.245632	0.740933	0.336706	FALSE
ATAD3_MOUSE	(Q925I1) ATPase family AAA domain-containing protein 3	0.205393	0.350497	-0.0543923	0.0172093	-0.21424	-0.0513992	0.1137	0.0648829	0.0299829	0.136191	-0.136062	0.245795	0.740933	-0.137811	FALSE
S4A4_MOUSE	(O88343) Electrogenic sodium bicarbonate cotransporter 1	-0.270556	-0.571322	0.120352	0.0129262	0.736388	1.01721	-0.397828	-0.00144342	-0.325539	-0.239566	0.209141	0.247784	0.740933	0.319773	FALSE
KCC2B_MOUSE	(P28652) Calcium/calmodulin-dependent protein kinase type II subunit beta	0.22404	-0.490051	0.045443	-0.163268	-0.0785637	0.178874	1.23266	-0.0424568	0.0086303	0.0384362	0.0143553	0.248133	0.740933	0.289093	FALSE
ATPB_MOUSE	(P56480) ATP synthase subunit beta, mitochondrial	-0.086201	0.015783	-0.0499049	0.0285692	-0.134477	-0.174621	0.111031	-0.12658	0.0229004	-0.0877334	-0.210897	0.249458	0.740933	-0.0628297	FALSE
DMXL2_MOUSE	(Q8BPN8) DmX-like protein 2	0.0690147	-0.0679388	0.0635029	-0.164884	-0.0232698	0.041243	0.137504	0.0384362	0.105678	0.0676387	0.0257376	0.249884	0.740933	0.0812146	FALSE
RAB4A_MOUSE	(P56371) Ras-related protein Rab-4A	0.111031	0.0496308	-0.013043	-0.166503	0.0813396	-0.0558912	0.051024	0.269033	0.0551957	0.0758749	0.121679	0.251013	0.740933	0.0901859	FALSE
PLXB1_MOUSE	(Q8CJH3) Plexin-B1	0.10165	-0.28279	0.0129262	-0.268817	0.0538064	-0.0320936	0.00144197	0.173767	0.0071955	-0.0679388	0.0786098	0.251387	0.740933	0.139942	FALSE
PTPA_MOUSE	(P58389) Serine/threonine-protein phosphatase 2A activator	-0.00144342	0.00288251	0.181421	0.250962	0.0676387	0.0648829	0.0717627	0.015783	0.141433	-0.176251	-0.109359	0.252757	0.740933	-0.0976138	FALSE
CAPZB_MOUSE	(P47757) F-actin-capping protein subunit beta	-0.0528949	-0.231075	-0.132894	-0.0306192	-0.0439433	-0.0528949	-0.0985055	-0.217591	0.0299829	0.0786098	0.0370307	0.25277	0.740933	0.0736834	FALSE
RL23_MOUSE	(P62830) 60S ribosomal protein L23	0.129613	-0.00288828	-0.316528	0.375178	-0.265345	-0.140826	-0.362158	-0.100051	-0.571322	0.077243	0.15056	0.25314	0.740933	-0.219472	FALSE
AP3D1_MOUSE	(O54774) AP-3 complex subunit delta-1	0.0342157	-0.231075	0.157044	0.0607392	0.359521	0.116365	0.140124	0.0071955	0.00144197	0.155749	0.1137	0.253592	0.740933	0.122497	FALSE
IMMT_MOUSE	(Q8CAQ8) Mitochondrial inner membrane protein	-0.0335695	-0.16004	0.00575927	0.0731347	-1.06492	-0.994241	0.405992	-0.226004	0.0071955	-0.013043	-0.16004	0.253629	0.740933	-0.263472	FALSE
ASTN1_MOUSE	(Q61137) Astrotactin-1	0.371838	-0.207561	-0.0424568	-0.454032	0.254594	-0.0484122	0.0827026	0.149259	0.197865	0.291604	0.211635	0.25364	0.740933	0.245803	FALSE
ASAH1_MOUSE	(Q9WV54) Acid ceramidase	-0.00578235	0.447844	-0.207561	0.221568	-0.0439433	-0.215915	-0.0877334	0.189034	-0.194295	-0.0247367	-0.24127	0.255385	0.740933	-0.202426	FALSE
MCU_MOUSE	(Q3UMR5) Calcium uniporter protein, mitochondrial	-0.312939	-0.00144342	-0.231075	0.0745054	-0.741783	-0.710756	-0.0558912	-0.200913	-0.21927	0.0285692	-0.181149	0.255523	0.740933	-0.179575	FALSE
CSK21_MOUSE	(Q60737) Casein kinase II subunit alpha	0.249749	-0.0499049	0.0299829	0.154454	0.00288251	0.126973	-0.018878	-0.140826	-0.0335695	0.0551957	0.0129262	0.257084	0.740933	-0.0953981	FALSE
SNG1_MOUSE	(O55100) Synaptogyrin-1	-0.0816138	-0.00144342	0.015783	0.0607392	-0.248108	-0.0424568	0.0635029	-0.123434	-0.0174171	0.0299829	-0.0923402	0.257793	0.740933	-0.0598334	FALSE
DYL2_MOUSE	(Q9D0M5) Dynein light chain 2, cytoplasmic	-0.382702	-0.275786	0.00432161	-0.164884	-0.204233	0.304511	-0.0908029	-0.153607	-0.253257	0.16092	-0.212568	0.258504	0.740933	0.140615	FALSE
VP26A_MOUSE	(P40336) Vacuolar protein sorting-associated protein 26A	0.530071	0.219091	0.264236	0.0662614	0.334568	-0.013043	0.191563	0.0949116	0.0867838	-0.114035	0.299831	0.258544	0.740933	-0.144118	FALSE
ERLN1_MOUSE	(Q91X78) Erlin-1	-0.265345	-0.0785637	-0.117161	0.283329	0.0299829	-0.22095	-0.312939	-0.086201	-0.595097	-0.226004	-0.121863	0.258619	0.740933	-0.174575	FALSE
STX1B_MOUSE	(P61264) Syntaxin-1B	-0.00433459	-0.018878	-0.0740006	-0.0831412	0.0071955	0.077243	-0.179515	0.0200577	0.0482362	0.0257376	-0.00144342	0.259182	0.740933	0.0447331	FALSE
SCRN1_MOUSE	(Q9CZC8) Secernin-1	0.0398403	-0.0558912	0.0593553	0.00432161	0.221568	-0.0159576	-0.0232698	0.125651	0.158337	-0.0573917	0.0703893	0.260417	0.740933	0.0565687	FALSE
ATP5J_MOUSE	(P97450) ATP synthase-coupling factor 6, mitochondrial	-0.139236	0.520045	-0.129734	0.332278	-0.56918	-0.0892673	-0.0954196	0.128293	-0.0800879	0.271426	-0.260152	0.261591	0.740933	-0.245037	FALSE
EI3JA_MOUSE	(Q3UGC7) Eukaryotic translation initiation factor 3 subunit J-A	-0.0144996	-0.118727	0.172488	0.304511	-0.128156	0.176323	-0.0634092	-0.360305	-0.0218044	-0.0846703	0.0881416	0.261736	0.740933	-0.142212	FALSE
KPCG_MOUSE	(P63318) Protein kinase C gamma type	0.172488	-0.121863	0.187768	0.115033	0.187768	0.137504	0.476122	0.252173	0.0894982	0.105678	0.132248	0.261912	0.740933	0.108928	FALSE
SPTN1_MOUSE	(P16546) Spectrin alpha chain, non-erythrocytic 1	-0.0709665	-0.0908029	0.0186342	-0.0649175	0	0.141433	-0.137648	-0.0174171	-0.0969617	0.105678	0.0172093	0.261932	0.740933	0.0537694	FALSE
BPHL_MOUSE	(Q8R164) Valacyclovir hydrolase	-0.0892673	-0.0785637	0.0482362	-0.0144996	0.0593553	0.0257376	0.276199	0.0356239	0.0676387	-0.0262051	-0.172994	0.262104	0.740933	0.0714315	FALSE
RAB2A_MOUSE	(P53994) Ras-related protein Rab-2A	0.200379	0.197865	-0.0679388	-0.0144996	-0.0203404	-0.0499049	-0.0588937	0.0935602	-0.0499049	0.0524159	-0.101598	0.262597	0.740933	-0.0981894	FALSE
GATM_MOUSE	(Q9D964) Glycine amidinotransferase, mitochondrial	0.328836	0.981122	-0.139236	0.479231	0.204141	-1.03801	0.253384	0.710173	0.217851	-0.109359	0.0370307	0.263026	0.740933	-0.373172	FALSE
CNDP2_MOUSE	(Q9D1A2) Cytosolic non-specific dipeptidase	0.137504	0.124328	-0.00868224	0.0172093	0.0758749	-0.077041	0.0524159	-0.0203404	0.0538064	-0.0724828	0.0717627	0.263332	0.740933	-0.0555903	FALSE
LAT1_MOUSE	(Q9Z127) Large neutral amino acids transporter small subunit 1	-0.53952	0.0881416	0.0313952	0.0299829	0.387363	0.288063	0.0962619	0.149259	-0.0954196	-0.145605	0.108357	0.264035	0.740933	0.210111	FALSE
2ABA_MOUSE	(Q6P1F6) Serine/threonine-protein phosphatase 2A 55 kDa regulatory subunit B alpha isoform	-0.0291463	0.0524159	-0.107803	0.00288251	0.0867838	0.0285692	0.478195	0.00432161	-0.0558912	-0.00288828	-0.0320936	0.264042	0.740933	0.0928409	FALSE
ETFA_MOUSE	(Q99LC5) Electron transfer flavoprotein subunit alpha, mitochondrial	-0.0306192	0.141433	-0.0203404	0.0496308	-0.37146	0.0482362	0.202888	-0.45799	0.0313952	-0.0694519	0.0271541	0.264744	0.740933	-0.119201	FALSE
PGM2L_MOUSE	(Q8CAA7) Glucose 1,6-bisphosphate synthase	-0.204233	-0.0908029	0.0813396	0.0398403	0.0200577	0.0398403	0.136191	0.0243197	0.136191	-0.120294	0.107018	0.266103	0.740933	0.0925104	FALSE
RABE1_MOUSE	(O35551) Rab GTPase-binding effector protein 1	0.107018	0.0114956	-0.00578235	-0.0923402	0.633199	-0.0954196	0.403813	0.205393	-0.0454314	-0.168123	0.0854247	0.266467	0.740933	0.140453	FALSE
AP2S1_MOUSE	(P62743) AP-2 complex subunit sigma	0.147958	0.100305	0.6107	-0.1976	0.95977	0.154454	0.177599	0.477159	0.323082	0.308011	0.459432	0.267049	0.740933	0.24316	FALSE
PIPNA_MOUSE	(P53810) Phosphatidylinositol transfer protein alpha isoform	-0.086201	0.115033	0.0100637	0.0086303	0.168642	-0.0724828	0.100305	0.0949116	0.215368	-0.0409718	0.0922074	0.268165	0.740933	0.0678298	FALSE
DNJA3_MOUSE	(Q99M87) DnaJ homolog subfamily A member 3, mitochondrial	-0.0513992	0.00432161	-0.0831412	0.0854247	-0.0785637	-0.161653	0.102994	0.0758749	-0.907793	0.0200577	-0.288065	0.268575	0.740933	-0.165537	FALSE
ITSN1_MOUSE	(Q9Z0R4) Intersectin-1	0.197865	0.0976108	0.211635	-0.0203404	1.1003	-0.227692	0.641546	1.43242	-0.321928	0.116365	0.271426	0.26888	0.740933	0.308657	FALSE
CHCH3_MOUSE	(Q9CRB9) Coiled-coil-helix-coiled-coil-helix domain-containing protein 3, mitochondrial	0.045443	-0.15682	-0.103147	-0.07552	-1.16488	-1.14561	0.219091	-0.300448	0.100305	0.0285692	-0.131313	0.269775	0.740933	-0.26953	FALSE
SYRC_MOUSE	(Q9D0I9) Arginine--tRNA ligase, cytoplasmic	0.0384362	0.158337	-0.155213	0.0717627	0.0271541	-0.109359	-0.176251	-0.0291463	-0.120294	-0.0350469	0.00144197	0.270558	0.740933	-0.0914024	FALSE
TPPP_MOUSE	(Q7TQD2) Tubulin polymerization-promoting protein	-0.107803	-0.121863	0.0129262	-0.0800879	-0.0365259	-0.0262051	-0.195946	-0.093879	-0.142417	-0.202572	-0.161653	0.27066	0.740933	-0.0485356	FALSE
GPDM_MOUSE	(Q64521) Glycerol-3-phosphate dehydrogenase, mitochondrial	-0.0394883	0.0648829	0.0731347	-0.00578235	-0.0664274	0.0086303	0.24732	-0.134477	-0.07552	-0.0923402	-0.265345	0.271068	0.740933	-0.0772094	FALSE
TIM10_MOUSE	(P62073) Mitochondrial import inner membrane translocase subunit Tim10	-0.142417	-0.137648	0.041243	0.345964	-0.14401	-0.00433459	0.00432161	-0.125006	-0.268817	-0.07552	-0.300448	0.271458	0.740933	-0.157331	FALSE
ENSA_MOUSE	(P60840) Alpha-endosulfine	-0.147202	0.132248	-0.15682	-0.0816138	0.45628	-0.093879	0.424385	-0.222633	-0.0558912	0.0200577	0.0071955	0.271889	0.740933	0.139849	FALSE
MUTA_MOUSE	(P16332) Methylmalonyl-CoA mutase, mitochondrial	0.0551957	-0.217591	-0.189351	-0.340075	-0.242977	-0.131313	0.0172093	-0.177882	0.250962	-0.137648	0.100305	0.271908	0.740933	0.127049	FALSE
NUCB1_MOUSE	(Q02819) Nucleobindin-1	-0.0923402	0.105678	-0.432455	0.27739	-0.0649175	-0.16004	-0.475936	0.0214797	-0.878321	-0.132894	-0.169745	0.273273	0.740945	-0.230336	FALSE
IVD_MOUSE	(Q9JHI5) Isovaleryl-CoA dehydrogenase, mitochondrial	-0.152003	0.0200577	-0.00868224	-0.115597	-0.077041	0.045443	0.24123	-0.136062	0.243669	-0.0394883	-0.123434	0.273944	0.740945	0.0861016	FALSE
DIRA2_MOUSE	(Q5PR73) GTP-binding protein Di-Ras2	0.0867838	0.0840643	-0.0649175	-0.169745	-0.121863	-0.168123	-0.0424568	-0.14401	-0.0709665	-0.0247367	-0.129734	0.27401	0.740945	-0.0843165	FALSE
STXB1_MOUSE	(O08599) Syntaxin-binding protein 1	-0.0800879	-0.0394883	-0.0439433	-0.187707	-0.0724828	0.0440443	-0.204233	-0.0816138	-0.00433459	0.100305	0.0229004	0.275318	0.74144	0.0598903	FALSE
VDAC2_MOUSE	(Q60930) Voltage-dependent anion-selective channel protein 2	1.38128	1.11036	-0.0513992	0.226509	-0.454032	-0.641604	0.451013	1.2394	0.222805	-0.212568	0.519039	0.275746	0.74144	-0.50611	FALSE
PGK1_MOUSE	(P09411) Phosphoglycerate kinase 1	0.280956	-0.187707	-0.00868224	-0.0619024	-0.0203404	-0.0603973	0.293959	0.186501	0.285698	0.0799754	0.246104	0.276498	0.74144	0.138834	FALSE
DCTN3_MOUSE	(Q9Z0Y1) Dynactin subunit 3	0.0071955	0.209141	0.0257376	0.0989585	0.255803	0.0867838	0.0356239	0.185232	0.167358	0.146655	0.169925	0.278298	0.74144	0.0643676	FALSE
ARF5_MOUSE	(P84084) ADP-ribosylation factor 5	0.134878	0.0827026	0.0524159	-0.263612	-0.125006	0.0440443	0.045443	0.27023	0.263034	0.195348	0.207893	0.279432	0.74144	0.127116	FALSE
TM9S2_MOUSE	(P58021) Transmembrane 9 superfamily member 2	0.051024	0.0468403	-0.277534	0.436162	-0.0619024	-0.2567	-0.00433459	0.233888	-0.818579	-0.0306192	-0.176251	0.281836	0.74144	-0.223337	FALSE
VATE1_MOUSE	(P50518) V-type proton ATPase subunit E 1	0.0908534	-0.0816138	0.0745054	-0.231075	-0.106249	0.10165	0.0328061	0.116365	0.263034	0.0214797	0.0440443	0.282587	0.74144	0.104422	FALSE
RAB5B_MOUSE	(P61021) Ras-related protein Rab-5B	-0.0439433	-0.046921	0.204141	-0.018878	0.0114956	0.231432	0.0894982	-0.222633	-0.471929	-0.204233	-0.118727	0.283571	0.74144	-0.12147	FALSE
SPN90_MOUSE	(Q9ESJ4) NCK-interacting protein with SH3 domain	-0.118727	0.051024	-0.244685	-0.395929	0.325386	-0.304006	-0.409278	0.155749	0.0114956	0.0129262	0.0551957	0.283577	0.74144	0.155289	FALSE
OXSR1_MOUSE	(Q6P9R2) Serine/threonine-protein kinase OSR1	0.0342157	-0.360305	0.752749	0.718088	1.93584	-0.258425	1.8496	0.619178	0.305679	0.447844	0.407081	0.283661	0.74144	0.471926	FALSE
CKAP5_MOUSE	(A2AGT5) Cytoskeleton-associated protein 5	-0.153607	-0.0649175	0.0482362	-0.394032	-0.176251	0.207893	0.0186342	-0.0159576	-0.0800879	-0.0603973	0.00575927	0.284108	0.74144	0.126736	FALSE
BAIP2_MOUSE	(Q8BKX1) Brain-specific angiogenesis inhibitor 1-associated protein 2	-0.0908029	0.320773	-0.16004	0.534062	-0.0174171	-0.0159576	-0.200913	0.0398403	-0.139236	0.045443	-0.174621	0.284474	0.74144	-0.217121	FALSE
DYN3_MOUSE	(Q8BZ98) Dynamin-3	0.0949116	0.0229004	0.167358	-0.0800879	0.171207	0.134878	0.200379	0.041243	0.105678	0.0786098	0.116365	0.285492	0.74144	0.0699237	FALSE
MTMR5_MOUSE	(Q6ZPE2) Myotubularin-related protein 5	-0.121863	-0.347399	0.0579701	-0.168123	0.195348	0.0496308	0.167358	-0.291592	-0.0439433	-0.22095	0.0071955	0.285846	0.74144	0.125289	FALSE
FXYD7_MOUSE	(P59648) FXYD domain-containing ion transport regulator 7	0.0285692	0.146655	-0.00723157	-0.0247367	-0.345564	-0.248108	0.537048	0.0538064	-0.50226	-0.0320936	-0.316528	0.286231	0.74144	-0.157771	FALSE
PRVA_MOUSE	(P32848) Parvalbumin alpha	0.347099	-0.011588	0.487486	-0.192645	0.725959	0.0299829	0.492622	0.553852	0.506907	0.149259	0.175045	0.286425	0.74144	0.218645	FALSE
VA0D1_MOUSE	(P51863) V-type proton ATPase subunit d 1	0.0840643	-0.554273	-0.00288828	-0.506353	-0.28279	-0.0218044	-0.227692	0.0881416	0.111031	0.187768	-0.0306192	0.286698	0.74144	0.219725	FALSE
NLGN2_MOUSE	(Q69ZK9) Neuroligin-2	0.0328061	-0.150401	0.124328	-0.304006	0.116365	-0.0144996	0.0482362	0.212881	0.0143553	-0.0954196	0.0813396	0.286783	0.74144	0.126212	FALSE
PRS4_MOUSE	(P62192) 26S protease regulatory subunit 4	-0.177882	0.0635029	0.0328061	-0.367732	0.0593553	0.0243197	0.00432161	-0.086201	0.0881416	-0.00578235	0.0398403	0.288656	0.742304	0.13004	FALSE
RUFY3_MOUSE	(Q9D394) Protein RUFY3	0.00288251	-0.0603973	0.0786098	-0.248108	0.0086303	0.00288251	0.0086303	-0.0694519	0.219091	-0.0306192	0.125651	0.288866	0.742304	0.0945838	FALSE
OGT1_MOUSE	(Q8CGY8) UDP-N-acetylglucosamine--peptide N-acetylglucosaminyltransferase 110 kDa subunit	0.109695	0	0.189034	0.0071955	0.172488	0.077243	0.351628	0.134878	0.329985	-0.00723157	0.0271541	0.289219	0.742304	0.0786824	FALSE
PRS7_MOUSE	(P46471) 26S protease regulatory subunit 7	0.0482362	-0.226004	-0.0232698	0.0854247	0.397255	-0.0499049	0.116365	-0.0649175	0.115033	-0.0247367	0.0426443	0.291171	0.743127	0.104866	FALSE
AEDO_MOUSE	(Q6PDY2) 2-aminoethanethiol dioxygenase	0.0703893	0.111031	0.0214797	0.166073	0.0676387	0.109695	0.217851	-0.112475	0.112367	-0.0724828	-0.148801	0.292037	0.743127	-0.0674157	FALSE
SPTB2_MOUSE	(Q62261) Spectrin beta chain, non-erythrocytic 1	-0.018878	0.00575927	0.0129262	0	0.0731347	0.10165	-0.123434	0.0635029	-0.0439433	0.159629	0.0621217	0.292308	0.743127	0.0418569	FALSE
ERMIN_MOUSE	(Q5EBJ4) Ermin	-0.152003	0.116365	-0.1976	0	-0.0528949	0.129613	-0.492079	-0.246395	-0.140826	-0.117161	-0.305788	0.292343	0.743127	-0.116766	FALSE
DCTN2_MOUSE	(Q99KJ8) Dynactin subunit 2	-0.123434	-0.107803	0.0143553	-0.100051	0.0313952	0.22404	-0.0174171	-0.106249	-0.011588	-0.132894	-0.106249	0.295215	0.74863	0.0622385	FALSE
NTRK2_MOUSE	(P15209) BDNF/NT-3 growth factors receptor	0.195348	-0.0232698	0.304511	-0.436354	0.978928	-0.0816138	0.929791	0.342555	-0.236164	0.0717627	-0.0101344	0.296027	0.7489	0.274959	FALSE
CAP1_MOUSE	(P40124) Adenylyl cyclase-associated protein 1	-0.0484122	0.045443	-0.192645	-0.101598	-0.397828	-0.0232698	-0.249822	-0.093879	-0.222633	-0.0816138	-0.0174171	0.297022	0.749626	-0.0809059	FALSE
RCN2_MOUSE	(Q8BP92) Reticulocalbin-2	-0.248108	-0.129734	-0.161653	0.319618	-0.0306192	-0.131313	-0.311148	-0.163268	-0.461959	-0.349235	-0.093879	0.299767	0.752187	-0.165234	FALSE
ATLA1_MOUSE	(Q8BH66) Atlastin-1	0.0071955	-0.0634092	-0.12658	-0.289827	-0.231075	-0.155213	-0.298673	0.0299829	0.176323	0.186501	0.295135	0.300534	0.752187	0.118581	FALSE
GNS_MOUSE	(Q8BFR4) N-acetylglucosamine-6-sulfatase	-0.0634092	0.267835	-0.302226	0.0949116	-0.354759	-0.358454	-0.479955	0.146655	-0.293359	0.109695	0.0129262	0.302459	0.752187	-0.173171	FALSE
RTN1_MOUSE	(Q8K0T0) Reticulon-1	-0.380822	-0.131313	-0.0724828	-0.244685	0	0.0593553	-0.284546	0.0229004	-0.279284	-0.0785637	-0.207561	0.302768	0.752187	0.0976545	FALSE
BASI_MOUSE	(P18572) Basigin	0.112367	-0.125006	0.041243	-0.0394883	0.24123	0.275007	0.00144197	0.243669	-0.0588937	0.0496308	-0.147202	0.302781	0.752187	0.0891332	FALSE
SV2A_MOUSE	(Q9JIS5) Synaptic vesicle glycoprotein 2A	0.0313952	-0.07552	0.136191	-0.176251	0.0607392	0.0703893	0.102994	0.0745054	0.168642	0.0243197	-0.0513992	0.3038	0.752187	0.0853589	FALSE
PLM_MOUSE	(Q9Z239) Phospholemman	0.0143553	-0.115597	-0.0846703	-0.0573917	0.489543	0.438293	-0.295128	0.164786	-0.12658	-0.00578235	-0.169745	0.304565	0.752187	0.131596	FALSE
DBNL_MOUSE	(Q62418) Drebrin-like protein	-0.115597	-0.0513992	-0.027675	0.14274	0.0496308	-0.140826	0.0370307	-0.0439433	-0.169745	-0.168123	-0.182786	0.304652	0.752187	-0.0754116	FALSE
ACOT2_MOUSE	(Q9QYR9) Acyl-coenzyme A thioesterase 2, mitochondrial	-0.163268	0.0243197	-0.0573917	-0.0954196	0.077243	0.0114956	0.452068	-0.0454314	0.0962619	-0.128156	-0.261881	0.306687	0.752187	0.10174	FALSE
DPM1_MOUSE	(O70152) Dolichol-phosphate mannosyltransferase	-0.12658	-0.046921	-0.018878	-0.190997	0.366252	-0.103147	0.471968	0.0071955	-0.298673	-0.0380063	-0.194295	0.306709	0.752187	0.126029	FALSE
LGMN_MOUSE	(O89017) Legumain	-0.378944	0.175045	-0.382702	0.24245	-0.129734	-0.139236	-0.459973	0.0758749	-0.741783	-0.320126	-0.461959	0.30807	0.752187	-0.224953	FALSE
ETFD_MOUSE	(Q921G7) Electron transfer flavoprotein-ubiquinone oxidoreductase, mitochondrial	0.153157	0.461529	0.00575927	0.0662614	-0.0439433	-0.123434	0.238787	-0.128156	0.321928	0.141433	-0.184425	0.308873	0.752187	-0.139935	FALSE
ETFB_MOUSE	(Q9DCW4) Electron transfer flavoprotein subunit beta	-0.0543923	-0.0664274	0.00575927	-0.172994	-0.0634092	0.0881416	0.166073	-0.117161	0.24732	-0.0365259	-0.232769	0.309454	0.752187	0.0793949	FALSE
BCAT1_MOUSE	(P24288) Branched-chain-amino-acid aminotransferase, cytosolic	0.117695	0.0894982	0.230203	0.112367	0.130931	-0.0892673	0.246104	0.49774	-0.0831412	-0.320126	-0.336428	0.309454	0.752187	-0.130896	FALSE
KPRB_MOUSE	(Q8R574) Phosphoribosyl pyrophosphate synthase-associated protein 2	-0.011588	0.0922074	0.343692	0.0313952	0.587845	-0.0513992	0.168642	0.136191	0.403813	0.120352	0.284514	0.310011	0.752187	0.121782	FALSE
AGK_MOUSE	(Q9ESW4) Acylglycerol kinase, mitochondrial	0.169925	0.0840643	0.0758749	0.077243	0.138814	-0.0484122	0.291604	-0.0588937	0.0356239	0.0342157	-0.110916	0.310466	0.752187	-0.0614859	FALSE
SODC_MOUSE	(P08228) Superoxide dismutase [Cu-Zn]	-0.242977	-0.100051	-0.117161	-0.150401	0.0854247	-0.0954196	-0.00144342	-0.109359	-0.118727	-0.229382	-0.205896	0.310717	0.752187	0.0562472	FALSE
MOES_MOUSE	(P26041) Moesin	0.112367	0.145351	-0.298673	0.16092	0.111031	-0.0908029	-0.134477	0.00288251	-0.524915	-0.114035	-0.0724828	0.311506	0.752187	-0.147534	FALSE
NEUM_MOUSE	(P06837) Neuromodulin	-0.16004	-0.14401	-0.234465	-0.217591	-0.352916	-0.118727	-0.632629	-0.261881	-0.21424	-0.107803	-0.184425	0.311519	0.752187	-0.0784904	FALSE
MIMIT_MOUSE	(Q59J78) Mimitin, mitochondrial	-0.123434	0.128293	0.267835	0.00144197	0.132248	-0.190997	0.230203	0.14274	-0.332789	-0.131313	-0.272297	0.312294	0.752219	-0.128849	FALSE
KKCC2_MOUSE	(Q8C078) Calcium/calmodulin-dependent protein kinase kinase 2	0.0172093	0.144046	-0.390245	-0.715486	0.0827026	-0.0573917	-0.239566	0.0299829	0.130931	-0.0380063	0.115033	0.312951	0.752219	0.239502	FALSE
ECSIT_MOUSE	(Q9QZH6) Evolutionarily conserved signaling intermediate in Toll pathway, mitochondrial	-0.00723157	0.374066	-0.248108	-0.100051	-0.204233	-0.330973	-0.0454314	-0.217591	-0.0619024	0.0440443	-0.302226	0.314491	0.753051	-0.164428	FALSE
CLCN7_MOUSE	(O70496) H(+)/Cl(-) exchange transporter 7	0.0731347	0.639695	-0.0439433	0.745883	0.395063	0.0200577	0.252173	0.289244	-0.184425	0.0285692	-0.0350469	0.316463	0.753051	-0.244316	FALSE
RS21_MOUSE	(Q9CQR2) 40S ribosomal protein S21	-0.117161	0.0565835	-0.37146	0.499782	-0.136062	-0.187707	-0.395929	0.0100637	-0.739372	-0.106249	0.0370307	0.316992	0.753051	-0.233825	FALSE
F10A1_MOUSE	(Q99L47) Hsc70-interacting protein	-0.0969617	-0.104697	-0.202572	-0.226004	-0.291592	-0.195946	-0.343732	-0.147202	-0.207561	-0.145605	-0.114035	0.317166	0.753051	-0.0489663	FALSE
ANXA7_MOUSE	(Q07076) Annexin A7	-0.161653	-0.268817	0.0854247	-0.0499049	0.0607392	0.0328061	0.222805	-0.093879	-0.0740006	-0.147202	-0.00578235	0.317906	0.753051	0.0980927	FALSE
AFG32_MOUSE	(Q8JZQ2) AFG3-like protein 2	0.0468403	0.243669	0.00432161	0.233888	0.0551957	0.0229004	0.205393	0.129613	0.0214797	0.0243197	-0.0877334	0.318362	0.753051	-0.0791558	FALSE
PSA_MOUSE	(Q11011) Puromycin-sensitive aminopeptidase	-0.123434	0.00288251	0.00432161	-0.0262051	0.0370307	-0.011588	0.0881416	-0.100051	-0.027675	0.0717627	-0.0144996	0.318408	0.753051	0.0417689	FALSE
RAP1A_MOUSE	(P62835) Ras-related protein Rap-1A	0.0440443	-0.0291463	0.0243197	0.0690147	0.199123	-0.610433	-0.0499049	0.0342157	-0.112475	0.0621217	-0.0816138	0.318981	0.753051	-0.10691	FALSE
INP4A_MOUSE	(Q9EPW0) Type I inositol 3,4-bisphosphate 4-phosphatase	0.0867838	0.207893	0.171207	0.200379	0.545968	-0.181149	2.21381	0.24245	0.178874	0.215368	0.21661	0.320514	0.754988	0.323711	FALSE
MAOX_MOUSE	(P06801) NADP-dependent malic enzyme	0.176323	-0.0558912	-0.106249	-0.139236	-0.0499049	-0.0573917	0.0299829	0.243669	0.221568	-0.0218044	0.0635029	0.322384	0.755252	0.092638	FALSE
GNAQ_MOUSE	(P21279) Guanine nucleotide-binding protein G(q) subunit alpha	-0.0785637	-0.027675	-0.0709665	0.0440443	-0.00288828	-0.100051	-0.314733	-0.12658	-0.177882	0.124328	-0.0694519	0.322474	0.755252	-0.0620323	FALSE
HIP1R_MOUSE	(Q9JKY5) Huntingtin-interacting protein 1-related protein	-0.129734	-0.0634092	-0.0144996	-0.132894	-0.0159576	-0.234465	0.115033	-0.21927	-0.226004	-0.265345	-0.195946	0.323717	0.755252	-0.0637164	FALSE
TPM3_MOUSE	(P21107) Tropomyosin alpha-3 chain	-0.248108	0.334568	-0.237864	0.105678	-0.0588937	-0.137648	-0.139236	-0.136062	-0.354759	-0.125006	-0.309359	0.324481	0.755252	-0.168706	FALSE
PACN2_MOUSE	(Q9WVE8) Protein kinase C and casein kinase substrate in neurons protein 2	0.0086303	0.0370307	-0.0218044	-0.163268	-0.0831412	0.0214797	-0.0800879	0.108357	0.0949116	0.0799754	0.0186342	0.324547	0.755252	0.0577284	FALSE
HSC20_MOUSE	(Q8K3A0) Iron-sulfur cluster co-chaperone protein HscB, mitochondrial	0.451013	0.391768	0.713696	0.302173	0.80488	-0.0335695	-0.320126	0.461529	0.261832	0.340277	0.526069	0.324901	0.755252	-0.173107	FALSE
VPP1_MOUSE	(Q9Z1G4) V-type proton ATPase 116 kDa subunit a isoform 1	0.164786	-0.347399	0.0285692	-0.356606	-0.21424	0.102994	-0.00578235	0.0229004	0.211635	0.0881416	0.0143553	0.325714	0.755487	0.159091	FALSE
DYN2_MOUSE	(P39054) Dynamin-2	0.0989585	0.0257376	0.169925	-0.0985055	0.163499	0.120352	0.210389	0.0271541	0.100305	0.0813396	0.120352	0.327914	0.758928	0.0685983	FALSE
GRP75_MOUSE	(P38647) Stress-70 protein, mitochondrial	-0.0558912	-0.0291463	-0.0679388	-0.101598	-0.323733	-0.136062	0.0524159	-0.153607	0.0229004	-0.0634092	-0.234465	0.329274	0.760414	-0.0557791	FALSE
PCKGM_MOUSE	(Q8BH04) Phosphoenolpyruvate carboxykinase [GTP], mitochondrial	-0.013043	-0.00723157	0.00432161	-0.0409718	0.0731347	-0.0831412	0.221568	0.0908534	0.258217	-0.0679388	-0.150401	0.33053	0.760626	0.0631301	FALSE
SGIP1_MOUSE	(Q8VD37) SH3-containing GRB2-like protein 3-interacting protein 1	-0.0291463	0.125651	-0.011588	-0.2567	0.0172093	0.137504	-0.234465	0.171207	0.107018	0.0496308	0.16092	0.330937	0.760626	0.101378	FALSE
MBP_MOUSE	(P04370) Myelin basic protein	-0.340075	0.447844	0.157044	0.0579701	-0.140826	-0.093879	-0.0800879	-0.222633	0.243669	-0.0694519	-0.450084	0.331518	0.760626	-0.19688	FALSE
NSMA2_MOUSE	(Q9JJY3) Sphingomyelin phosphodiesterase 3	-0.0262051	0.146655	0.166073	0.121679	0.163499	0.133564	0.0593553	0.116365	-0.0724828	-0.077041	-0.0306192	0.333146	0.762219	-0.0602447	FALSE
RAP2C_MOUSE	(Q8BU31) Ras-related protein Rap-2c	-0.011588	-0.0409718	0.130931	0.125651	0.141433	0.0621217	0.051024	0.181421	0.00575927	0.144046	0.157044	0.334119	0.762219	0.0551157	FALSE
ALR_MOUSE	(P56213) FAD-linked sulfhydryl oxidase ALR	0.163499	-0.0454314	0.0813396	0.0342157	-0.184425	-0.117161	0.275007	0.0496308	0.121679	-0.114035	-0.190997	0.334369	0.762219	-0.0813059	FALSE
TPD54_MOUSE	(Q9CYZ2) Tumor protein D54	0.0635029	0.157044	0.0496308	0.0607392	0.202888	0.0635029	0.183963	0.00432161	-0.0159576	-0.96016	-0.0174171	0.335501	0.763158	-0.159709	FALSE
EMC4_MOUSE	(Q9CZX9) ER membrane protein complex subunit 4	0.100305	-0.0203404	-0.0877334	1.09694	0.604071	-0.349235	0.553852	-0.0969617	-0.940645	-0.330973	-0.0409718	0.337321	0.765124	-0.35813	FALSE
CADM1_MOUSE	(Q8R5M8) Cell adhesion molecule 1	0.172488	-0.0634092	0.117695	-0.00288828	0.23634	0.0867838	-0.158429	0.356144	0.0398403	0.31034	0.129613	0.338143	0.765124	0.086976	FALSE
S6A11_MOUSE	(P31650) Sodium- and chloride-dependent GABA transporter 3	-0.254978	-0.202572	-0.152003	-0.0679388	0.391768	0.511974	-0.595097	-0.14401	0.0186342	-0.0380063	-0.263612	0.339317	0.765124	0.152466	FALSE
IF6_MOUSE	(O55135) Eukaryotic translation initiation factor 6	0.227741	0.385155	0.0482362	0.345964	0.934328	-0.648372	2.07279	0.612588	-0.125006	0.590722	0.710173	0.340163	0.765124	0.340687	FALSE
RD23B_MOUSE	(P54728) UV excision repair protein RAD23 homolog B	-0.0144996	-0.137648	0.0935602	0.0635029	0.117695	0.16221	0.0827026	-0.147202	0.163499	0.0621217	0.0384362	0.340258	0.765124	0.0672657	FALSE
ARFG1_MOUSE	(Q9EPJ9) ADP-ribosylation factor GTPase-activating protein 1	-0.0679388	0.108357	0.105678	-0.277534	0.0840643	-0.0694519	0.468844	-0.0969617	0.279768	-0.114035	0.0922074	0.340881	0.765124	0.124922	FALSE
GD1L1_MOUSE	(Q8VE33) Ganglioside-induced differentiation-associated protein 1-like 1	-0.189351	-0.0174171	0.145351	0.238787	0.522056	-0.24127	0.791606	0.136191	0.149259	-0.046921	0.133564	0.341418	0.765124	0.162012	FALSE
MAP2_MOUSE	(P20357) Microtubule-associated protein 2	-0.254978	0.0143553	-0.104697	-0.0174171	-0.00144342	-0.0513992	-0.415037	-0.268817	-0.340075	-0.00578235	-0.164884	0.344754	0.769498	-0.0875213	FALSE
PSB1_MOUSE	(O09061) Proteasome subunit beta type-1	0.260628	-0.0409718	0.292782	-0.248108	0.325386	0.177599	0.324235	0.301002	0.477159	-0.101598	0.041243	0.345882	0.769498	0.154636	FALSE
PCYXL_MOUSE	(Q8C7K6) Prenylcysteine oxidase-like	-0.0969617	-0.0785637	-0.298673	0.316146	-0.0634092	-0.21424	-0.442222	-0.239566	-0.395929	-0.0365259	0.0468403	0.34639	0.769498	-0.152637	FALSE
SPRY7_MOUSE	(Q3TFQ1) SPRY domain-containing protein 7	0.163499	0.0579701	-0.164884	0	0.471968	0.0114956	-0.110916	-0.1976	-0.229382	-0.270556	-0.512514	0.346594	0.769498	-0.13379	FALSE
LIN7A_MOUSE	(Q8JZS0) Protein lin-7 homolog A	-0.07552	-0.756331	0.0607392	-0.239566	0.0949116	0.1137	0.0840643	-0.286304	-0.189351	-0.186065	0.0229004	0.347403	0.769498	0.20322	FALSE
REEP2_MOUSE	(Q8VCD6) Receptor expression-enhancing protein 2	-0.0877334	0.137504	-0.018878	0.0593553	-0.0101344	-0.202572	-0.131313	0.102994	-0.190997	0.045443	0.0662614	0.347726	0.769498	-0.0683216	FALSE
TMEDA_MOUSE	(Q9D1D4) Transmembrane emp24 domain-containing protein 10	0.584963	0.60502	-0.436354	-0.0159576	-0.274041	0.0200577	-0.567041	0.668119	-0.641604	-0.148801	0.0813396	0.350893	0.774888	-0.307556	FALSE
SFXN3_MOUSE	(Q91V61) Sideroflexin-3	0.171207	0.0799754	-0.12658	0.155749	-0.215915	-0.202572	0.151859	0.0799754	-0.0320936	0.0621217	0.0398403	0.354447	0.778859	-0.0867712	FALSE
SYT12_MOUSE	(Q920N7) Synaptotagmin-12	0.230203	0.124328	0.0745054	-0.0144996	0.015783	0.0356239	0.180148	0.169925	-0.0365259	0.0356239	-0.132894	0.354777	0.778859	-0.0653937	FALSE
SNP47_MOUSE	(Q8R570) Synaptosomal-associated protein 47	-0.0664274	-0.011588	0.0172093	-0.0335695	0.0468403	-0.00868224	0.0690147	-0.215915	-0.184425	-0.0320936	-0.168123	0.354913	0.778859	-0.0468894	FALSE
ADDG_MOUSE	(Q9QYB5) Gamma-adducin	0.0299829	-0.0306192	-0.0499049	-0.0969617	0.126973	0.0551957	0.0648829	-0.121863	-0.103147	-0.00868224	0.0229004	0.35563	0.778859	0.0420557	FALSE
HCN1_MOUSE	(O88704) Potassium/sodium hyperpolarization-activated cyclic nucleotide-gated channel 1	-0.32916	0.457332	-0.0262051	-0.0439433	0.312665	0.27739	0.0271541	-0.588574	-0.599462	-0.91866	-0.0724828	0.356857	0.779936	-0.237644	FALSE
RPN2_MOUSE	(Q9DBG6) Dolichyl-diphosphooligosaccharide--protein glycosyltransferase subunit 2	0.0482362	0.345964	-0.430509	0.516015	-0.0619024	-0.169745	-0.473931	0.111031	-0.592919	0.0607392	0.275007	0.35853	0.781178	-0.241601	FALSE
SYLM_MOUSE	(Q8VDC0) Probable leucine--tRNA ligase, mitochondrial	-0.234465	-0.204233	0.0621217	0.0342157	0.0635029	0.0271541	0.359521	-0.304006	0.0908534	-0.14401	0.0565835	0.359577	0.781178	0.106961	FALSE
HSDL2_MOUSE	(Q2TPA8) Hydroxysteroid dehydrogenase-like protein 2	0.0745054	0.0551957	-0.0603973	0.115033	0.0172093	0.00575927	0.175045	0.172488	0.232661	0.166073	-0.0634092	0.360257	0.781178	0.054748	FALSE
SERA_MOUSE	(Q61753) D-3-phosphoglycerate dehydrogenase	-0.120294	-0.018878	-0.0528949	-0.12658	-0.139236	-0.0954196	-0.0203404	-0.0619024	0.0100637	0.0129262	-0.0320936	0.360374	0.781178	0.0330902	FALSE
FABD_MOUSE	(Q8R3F5) Malonyl-CoA-acyl carrier protein transacylase, mitochondrial	-0.120294	0.168642	0.151859	0.0827026	-0.33825	0.0200577	0.227741	-0.0232698	-0.07552	-0.0101344	0.0676387	0.36223	0.781501	-0.0895469	FALSE
CLCB_MOUSE	(Q6IRU5) Clathrin light chain B	0.0257376	-0.118727	-0.0306192	-0.150401	-0.205896	-0.0513992	0.119024	0.0799754	0.0468403	-0.0877334	0.0129262	0.36312	0.781501	0.0561792	FALSE
KPCA_MOUSE	(P20444) Protein kinase C alpha type	0.183963	-0.0588937	-0.226004	-0.121863	0.051024	-0.0831412	0.00432161	-0.011588	0.108357	0.128293	0.0758749	0.364011	0.781501	0.0947197	FALSE
CF211_MOUSE	(A6H630) UPF0364 protein C6orf211 homolog	0.0299829	-0.246395	-0.0664274	0.0468403	-0.0247367	0.177599	-0.114035	0.199123	0.23634	-0.0908029	-0.171368	0.365164	0.781501	0.0893025	FALSE
PHAR1_MOUSE	(Q2M3X8) Phosphatase and actin regulator 1	0.182692	0.0398403	0.0867838	-0.00433459	0.0908534	-0.0439433	0.255803	0.0962619	0.237564	0.186501	0.0881416	0.365752	0.781501	0.0539232	FALSE
GBRA1_MOUSE	(P62812) Gamma-aminobutyric acid receptor subunit alpha-1	0.0285692	-0.086201	-0.013043	0.0129262	0.0071955	-0.077041	-0.134477	0.0621217	-0.0724828	0.00432161	-0.152003	0.367116	0.781501	-0.0373293	FALSE
DC1I1_MOUSE	(O88485) Cytoplasmic dynein 1 intermediate chain 1	0.0717627	0.0356239	0.0717627	-0.046921	0.291604	0.077243	0.120352	-0.0203404	0	-0.0247367	0.125651	0.367188	0.781501	0.048339	FALSE
SV2B_MOUSE	(Q8BG39) Synaptic vesicle glycoprotein 2B	0.0579701	0.0538064	0.151859	0.149259	0.166073	0.0426443	0.349365	0.125651	0.108357	0.146655	0.0894982	0.3673	0.781501	0.0436683	FALSE
TCPD_MOUSE	(P80315) T-complex protein 1 subunit delta	-0.00288828	-0.011588	-0.110916	-0.00144342	0.0257376	0.0243197	-0.0159576	-0.0144996	0.126973	-0.0846703	-0.0394883	0.368012	0.781501	0.0349109	FALSE
NCLN_MOUSE	(Q8VCM8) Nicalin	-0.395929	0.0703893	-0.467932	0.341417	-0.103147	-0.21424	-0.510457	-0.147202	-0.91866	-0.274041	-0.16004	0.368155	0.781501	-0.219527	FALSE
VAT1_MOUSE	(Q62465) Synaptic vesicle membrane protein VAT-1 homolog	-0.187707	-0.253257	0	-0.305788	-0.325539	0.0745054	-0.560643	0.041243	0.209141	-0.101598	0.197865	0.368632	0.781501	0.120256	FALSE
DEST_MOUSE	(Q9R0P5) Destrin	0.621056	0.0813396	0.0229004	-0.150401	0.327687	0.104337	-0.00578235	0.625738	0.31034	0.418999	0.517024	0.371566	0.783683	0.184611	FALSE
CMC1_MOUSE	(Q8BH59) Calcium-binding mitochondrial carrier protein Aralar1	-0.0528949	0.196607	-0.212568	0.105678	-0.358454	-0.531156	0.0827026	-0.0365259	0.100305	-0.101598	0.0579701	0.371937	0.783683	-0.121599	FALSE
GNL1_MOUSE	(P36916) Guanine nucleotide-binding protein-like 1	-0.0174171	-0.209228	0.314986	0.115033	0.62293	-0.249822	1.26604	0.355016	-0.362158	0.0356239	0.250962	0.372416	0.783683	0.22324	FALSE
ACADV_MOUSE	(P50544) Very long-chain specific acyl-CoA dehydrogenase, mitochondrial	-0.152003	0.0717627	-0.229382	-0.516636	-0.204233	-0.147202	0.0867838	-0.284546	0.267835	-0.0740006	-0.128156	0.372619	0.783683	0.13749	FALSE
TCPA_MOUSE	(P11983) T-complex protein 1 subunit alpha	-0.0174171	-0.0320936	-0.137648	-0.311148	-0.112475	-0.12658	-0.305788	0.0524159	0.111031	0.169925	-0.0543923	0.373536	0.784055	0.0865962	FALSE
1433Z_MOUSE	(P63101) 14-3-3 protein zeta/delta	0.00575927	-0.0664274	-0.0335695	-0.168123	-0.275786	0.167358	-0.166503	0.0370307	0.130931	0.0257376	0.0935602	0.374633	0.784805	0.0673513	FALSE
ADDB_MOUSE	(Q9QYB8) Beta-adducin	-0.0380063	-0.101598	0.124328	0.0229004	0.230203	0.129613	0	-0.0679388	-0.0484122	0.134878	0.0524159	0.377052	0.786767	0.0596309	FALSE
SERC1_MOUSE	(Q9QZI8) Serine incorporator 1	0.0565835	0.0538064	-0.0484122	0.221568	-0.013043	0.151859	-0.244685	0.109695	-0.384584	0.186501	0.0496308	0.377403	0.786767	-0.0915474	FALSE
ODPB_MOUSE	(Q9D051) Pyruvate dehydrogenase E1 component subunit beta, mitochondrial	-0.168123	0.0854247	-0.0262051	0.0100637	-0.442222	0.0271541	0.0243197	-0.281036	0.0621217	0.0271541	-0.181149	0.37853	0.786767	-0.0843841	FALSE
HPCA_MOUSE	(P84075) Neuron-specific calcium-binding protein hippocalcin	0.0328061	0.0299829	0.105678	0.147958	-0.0394883	0.185232	-0.0380063	0.0299829	-0.0159576	0.121679	0.0299829	0.37982	0.786767	-0.0400456	FALSE
GMFB_MOUSE	(Q9CQI3) Glia maturation factor beta	-0.0694519	-0.150401	0.041243	-0.0969617	0.0922074	0.0271541	0.119024	-0.0923402	0.0186342	-0.190997	-0.0785637	0.380121	0.786767	0.0539099	FALSE
HAP28_MOUSE	(Q3UHX2) 28 kDa heat- and acid-stable phosphoprotein	-0.152003	-0.0499049	0.0398403	-0.179515	-0.323733	-0.046921	-0.12658	-0.158429	-0.171368	-0.0603973	-0.115597	0.380343	0.786767	-0.0578939	FALSE
TBCB_MOUSE	(Q9D1E6) Tubulin-folding cofactor B	0.0114956	-0.205896	0.10165	-0.0335695	0.449957	0.0356239	0.473008	-0.131313	0.0257376	-0.140826	-0.150401	0.380765	0.786767	0.111835	FALSE
MYPT1_MOUSE	(Q9DBR7) Protein phosphatase 1 regulatory subunit 12A	-0.179515	-0.117161	0.169925	-0.152003	-0.0664274	0.0621217	-0.140826	-0.046921	0.015783	0.0690147	0.243669	0.383275	0.790411	0.0891763	FALSE
EAA2_MOUSE	(P43006) Excitatory amino acid transporter 2	0.0881416	-0.33825	-0.0877334	-0.316528	0.327687	0.959028	-0.562772	0.0468403	-0.253257	0.0129262	-0.302226	0.38457	0.791542	0.196196	FALSE
ODPX_MOUSE	(Q8BKZ9) Pyruvate dehydrogenase protein X component, mitochondrial	-0.0247367	0.0635029	0.0468403	-0.0543923	0.0745054	-0.00578235	0.397255	0.045443	0.217851	-0.16004	-0.0365259	0.386595	0.794168	0.0682973	FALSE
AL4A1_MOUSE	(Q8CHT0) Delta-1-pyrroline-5-carboxylate dehydrogenase, mitochondrial	-0.985645	-0.793357	-0.0588937	-0.668868	-0.655172	-0.434403	-0.432455	-1.16488	-1.85726	-0.907793	-0.696658	0.389652	0.7989	-0.251684	FALSE
CISD3_MOUSE	CDGSH iron-sulfur domain-containing protein 3, mitochondrial OS=Mus musculus GN=Cisd3 PE=2 SV=1	0.132248	0.0313952	0.181421	0.0214797	0.0313952	-0.237864	0.760434	-0.106249	-0.42082	-0.0634092	-0.293359	0.39066	0.799024	-0.13876	FALSE
FXYD6_MOUSE	(Q9D164) FXYD domain-containing ion transport regulator 6	0.0496308	-0.086201	0.153157	0.0143553	-0.0785637	0.00432161	-0.212568	0.0648829	-0.200913	0.138814	0.0607392	0.39122	0.799024	-0.0646334	FALSE
SNAB_MOUSE	(P28663) Beta-soluble NSF attachment protein	0.0100637	-0.0365259	0.0962619	0.205393	0.0299829	0.147958	-0.0144996	-0.07552	-0.0877334	0.100305	-0.0262051	0.393208	0.799352	-0.0581855	FALSE
GRIA2_MOUSE	(P23819) Glutamate receptor 2	-0.204233	-0.121863	-0.100051	-0.330973	-0.129734	-0.163268	-0.139236	-0.277534	-0.142417	-0.093879	0.0243197	0.393584	0.799352	0.0576018	FALSE
AT5G1_MOUSE	ATP synthase lipid-binding protein, mitochondrial OS=Mus musculus GN=Atp5g1 PE=2 SV=1	0.235114	-0.137648	0.690641	-0.26708	0.432959	0.78576	0.597412	0.0745054	0.60027	-0.0365259	0.0717627	0.393643	0.799352	0.230621	FALSE
PACR_MOUSE	(P70205) Pituitary adenylate cyclase-activating polypeptide type I receptor	0.846393	0.382944	0.513996	0.360645	0.789938	0.199123	0.583038	1.22836	0.592636	0.594549	0.708408	0.395342	0.801267	0.144869	FALSE
PRDX5_MOUSE	(P99029) Peroxiredoxin-5, mitochondrial	-0.107803	0.124328	-0.109359	0.0271541	-0.125006	0.0143553	0.16221	-0.260152	0.0214797	-0.177882	-0.270556	0.39799	0.802956	-0.074373	FALSE
ARMC1_MOUSE	(Q9D7A8) Armadillo repeat-containing protein 1	0.0285692	-0.00723157	-0.2567	0.249749	-0.242977	-0.446148	0.22033	-0.027675	-0.239566	0.0922074	-0.177882	0.398874	0.802956	-0.120984	FALSE
PRIO_MOUSE	(P04925) Major prion protein	0.0579701	-0.0101344	-0.0499049	-0.013043	0.125651	-0.186065	-0.289827	0.107018	-0.279284	0.051024	-0.00433459	0.398937	0.802956	-0.0641958	FALSE
GBLP_MOUSE	(P68040) Guanine nucleotide-binding protein subunit beta-2-like 1	-0.137648	0.0745054	-0.168123	0.285698	-0.207561	-0.270556	-0.325539	0.128293	-0.409278	0.0593553	0.233888	0.399474	0.802956	-0.126665	FALSE
PLEC_MOUSE	(Q9QXS1) Plectin	-0.0831412	-0.121863	0.0440443	-0.0159576	0.119024	0.168642	0.171207	0.280956	-0.123434	-0.128156	-0.268817	0.399963	0.802956	0.0755755	FALSE
TOM20_MOUSE	(Q9DCC8) Mitochondrial import receptor subunit TOM20 homolog	-0.128156	-0.422752	-0.323733	0.195348	-0.592919	-0.805913	0.0813396	-0.027675	-0.442222	-0.510457	-0.046921	0.402974	0.803674	-0.165143	FALSE
USO1_MOUSE	(Q9Z1Z0) General vesicular transport factor p115	0.00432161	0.0799754	-0.209228	0.14274	-0.164884	-0.0101344	-0.258425	0.117695	-0.253257	0.0482362	-0.0424568	0.404119	0.803674	-0.0849133	FALSE
SELM_MOUSE	(Q8VHC3) Selenoprotein M	0.105678	-0.00144342	-0.397828	-0.0101344	-0.0588937	-0.300448	-0.680382	-0.265345	-0.274041	0.051024	0.0786098	0.404429	0.803674	-0.131136	FALSE
MDHM_MOUSE	(P08249) Malate dehydrogenase, mitochondrial	0.00575927	0.166073	-0.0846703	-0.0335695	-0.277534	-0.158429	0.141433	-0.120294	0.181421	-0.00578235	-0.186065	0.404807	0.803674	-0.0741482	FALSE
NCEH1_MOUSE	(Q8BLF1) Neutral cholesterol ester hydrolase 1	0.0813396	0.0962619	-0.0350469	0.331132	0.393965	-0.0831412	-0.0424568	0.136191	-0.454032	-0.0649175	0.172488	0.405863	0.803674	-0.110122	FALSE
3HIDH_MOUSE	(Q99L13) 3-hydroxyisobutyrate dehydrogenase, mitochondrial	-0.00578235	-0.114035	0.0758749	-0.184425	-0.153607	0.125651	0.190299	-0.181149	0.289244	-0.0365259	-0.086201	0.405963	0.803674	0.0781934	FALSE
GEPH_MOUSE	(Q8BUV3) Gephyrin	0.0398403	0.0962619	-0.0203404	0.225275	0.487486	0.0299829	0.199123	0.125651	0.123004	0.0799754	0.0370307	0.406224	0.803674	0.0693484	FALSE
IF4H_MOUSE	(Q9WUK2) Eukaryotic translation initiation factor 4H	-0.0320936	0.168642	-0.046921	0.169925	0.0370307	-0.139236	-0.00723157	0.112367	-0.0679388	0.0398403	0.045443	0.406893	0.803674	-0.0619918	FALSE
VPS35_MOUSE	(Q9EQH3) Vacuolar protein sorting-associated protein 35	0.105678	0.144046	-0.117161	0.0758749	-0.0247367	0.0524159	0.0989585	0.126973	0.1137	0.233888	0.183963	0.407658	0.803674	0.0600565	FALSE
NFL_MOUSE	(P08551) Neurofilament light polypeptide	-0.270556	0.185232	-0.0484122	0.0551957	-0.0664274	0.00575927	-0.334607	-0.217591	-0.226004	0.209141	-0.248108	0.409103	0.803674	-0.10577	FALSE
AATM_MOUSE	(P05202) Aspartate aminotransferase, mitochondrial	0.0867838	-0.21424	0.0635029	0.132248	-0.531156	0.263034	-0.0985055	-0.298673	0.0271541	-0.0232698	0.0257376	0.409661	0.803674	-0.107885	FALSE
SOGA3_MOUSE	(Q6NZL0) Protein SOGA3	0.0662614	0.0129262	0.0962619	-0.00578235	0.227741	0.151859	0.0342157	0.00288251	-0.0424568	0.128293	0.0524159	0.41005	0.803674	0.0368619	FALSE
LPPR4_MOUSE	(Q7TME0) Lipid phosphate phosphatase-related protein type 4	0.1137	-0.351074	0.0867838	-0.0439433	-0.00723157	-0.011588	-0.117161	0.0758749	-0.384584	-0.274041	-0.430509	0.410177	0.803674	-0.115544	FALSE
CLH1_MOUSE	(Q68FD5) Clathrin heavy chain 1	-0.0218044	-0.199255	0.16092	-0.00144342	-0.00433459	0.138814	0.27023	-0.0740006	0.182692	-0.0350469	-0.0350469	0.412098	0.805302	0.0787254	FALSE
SKP1_MOUSE	(Q9WTX5) S-phase kinase-associated protein 1	-0.137648	-0.0484122	0.0827026	0.0496308	0.176323	-0.00288828	0.100305	0.0935602	-0.0454314	-0.00723157	-0.0409718	0.412527	0.805302	0.0525266	FALSE
PDK3_MOUSE	(Q922H2) [Pyruvate dehydrogenase [lipoamide]] kinase isozyme 3, mitochondrial	-0.215915	0.0200577	0.275007	-0.0439433	0.130931	0.0799754	0.511974	0.0703893	0.119024	-0.093879	0.00432161	0.416377	0.809698	0.108732	FALSE
CD166_MOUSE	(Q61490) CD166 antigen	0.359521	-0.0306192	0.0703893	-0.272297	-0.147202	-0.0174171	-0.293359	-0.109359	-0.0954196	0.0799754	-0.07552	0.41722	0.809698	-0.125791	FALSE
BAG6_MOUSE	(Q9Z1R2) Large proline-rich protein BAG6	0.651683	0.299831	0.745883	-0.00578235	2.09694	-0.575615	0.423309	2.51576	0.200379	0.38405	0.605968	0.417753	0.809698	0.384352	FALSE
HS90A_MOUSE	(P07901) Heat shock protein HSP 90-alpha	-0.0619024	-0.0262051	-0.0969617	-0.0831412	-0.0892673	-0.00578235	-0.168123	-0.279284	0.0635029	-0.145605	-0.114035	0.418045	0.809698	-0.0384608	FALSE
TERA_MOUSE	(Q01853) Transitional endoplasmic reticulum ATPase	0.151859	-0.131313	0.187768	-0.187707	0.180148	0.164786	0.200379	-0.0543923	0.396159	-0.134477	-0.00144342	0.419555	0.809698	0.102157	FALSE
PGAM1_MOUSE	(Q9DBJ1) Phosphoglycerate mutase 1	0.212881	-0.42082	-0.0218044	-0.158429	-0.380822	0.24123	-0.179515	0.0881416	0.0935602	0.125651	0.308011	0.420165	0.809698	0.139366	FALSE
S4A8_MOUSE	(Q8JZR6) Electroneutral sodium bicarbonate exchanger 1	-0.131313	-0.164884	0.15056	0.0854247	0.217851	-0.0174171	-0.15682	0.1137	-0.32916	-0.224317	-0.39973	0.420572	0.809698	-0.0986456	FALSE
LGUL_MOUSE	(Q9CPU0) Lactoylglutathione lyase	-0.477944	-0.469929	0.0214797	-0.153607	-0.121863	0.111031	0.0565835	-0.554273	-0.0740006	-0.554273	0.273814	0.42089	0.809698	0.146717	FALSE
PGRC2_MOUSE	(Q80UU9) Membrane-associated progesterone receptor component 2	0.0214797	-0.867752	-0.121863	0.0524159	0.0840643	-0.296899	-0.194295	0.24245	0.232661	-0.115597	-0.107803	0.422586	0.810437	0.206727	FALSE
VISL1_MOUSE	(P62761) Visinin-like protein 1	0.0229004	0.0593553	0.0703893	-0.222633	-0.224317	-0.0291463	-0.254978	-0.0634092	0.0229004	-0.00144342	-0.0619024	0.422822	0.810437	-0.0699739	FALSE
SYNJ1_MOUSE	(Q8CHC4) Synaptojanin-1	0.0257376	-0.0320936	0.00432161	-0.224317	-0.132894	0.0328061	-0.120294	0.0143553	0.0922074	0.124328	0.00432161	0.424183	0.810437	0.0587065	FALSE
CSN7A_MOUSE	(Q9CZ04) COP9 signalosome complex subunit 7a	-0.0350469	0.0342157	0.153157	0.178874	0.403813	0.381837	0.305679	-0.109359	0.10165	-0.00868224	0.0426443	0.424647	0.810437	0.0768547	FALSE
PLCX3_MOUSE	(Q8BLJ3) PI-PLC X domain-containing protein 3	0.266637	-0.115597	0.231432	-0.0800879	0.831877	0.0200577	0.62293	0.696884	-0.24127	-0.494109	0.360645	0.425097	0.810437	0.181121	FALSE
AGM1_MOUSE	(Q9CYR6) Phosphoacetylglucosamine mutase	0.10165	0.176323	0.0071955	0.0524159	0.133564	0.0648829	0.1137	0.172488	0.0758749	-0.00578235	0.37629	0.427171	0.812928	0.0486064	FALSE
PPIB_MOUSE	(P24369) Peptidyl-prolyl cis-trans isomerase B	-0.136062	0.207893	-0.33825	0.31034	0.0129262	-0.148801	-0.318326	0.0356239	-0.541618	-0.00433459	0.00575927	0.429445	0.81443	-0.147947	FALSE
PP1R7_MOUSE	(Q3UM45) Protein phosphatase 1 regulatory subunit 7	-0.349235	0.0342157	-0.184425	-0.027675	-0.190997	-0.0394883	-0.384584	0.0271541	-0.114035	0.440421	0.0922074	0.429621	0.81443	0.107591	FALSE
1433B_MOUSE	(Q9CQV8) 14-3-3 protein beta/alpha	-0.0649175	0.137504	-0.0877334	0.0114956	-0.231075	0.111031	-0.215915	-0.21424	0.117695	-0.0619024	0.0370307	0.431102	0.81443	-0.0644264	FALSE
NMRL1_MOUSE	(Q8K2T1) NmrA-like family domain-containing protein 1	-0.182786	-0.00433459	-0.209228	0.0786098	0.0648829	0.0676387	0.476122	-0.103147	-0.00433459	-0.234465	-0.172994	0.431594	0.81443	0.0928209	FALSE
RL37_MOUSE	(Q9D823) 60S ribosomal protein L37	0.221568	0.462576	0.333424	1.16414	0.784085	0.464668	0.238787	0.477159	-0.00433459	0.197865	0.246104	0.431801	0.81443	-0.201951	FALSE
GBG4_MOUSE	(P50153) Guanine nucleotide-binding protein G(I)/G(S)/G(O) subunit gamma-4	0.264236	0.199123	0.0129262	-0.227692	0.157044	-0.224317	-0.378944	0.380729	-0.166503	-0.304006	0.0908534	0.433884	0.815505	-0.12574	FALSE
SNAG_MOUSE	(Q9CWZ7) Gamma-soluble NSF attachment protein	-0.171368	-0.00144342	-0.0306192	-0.07552	-0.00868224	0.15056	-0.224317	-0.0335695	-0.0499049	-0.027675	0.0257376	0.436517	0.815505	0.045759	FALSE
EFHA2_MOUSE	(Q9CTY5) EF-hand domain-containing family member A2	-0.148801	-0.0409718	-0.187707	0.495695	0.751892	-0.526992	1.60549	-0.0350469	-0.258425	0.225275	0.222805	0.436659	0.815505	0.254018	FALSE
MPPB_MOUSE	(Q9CXT8) Mitochondrial-processing peptidase subunit beta	0.0071955	0.0524159	0.0690147	0.124328	0.180148	-0.018878	0.473008	0.0426443	0.261832	0.0551957	-0.104697	0.437068	0.815505	0.0637974	FALSE
MFF_MOUSE	(Q6PCP5) Mitochondrial fission factor	0.0313952	-0.0159576	-0.192645	0.16092	-0.237864	-0.00288828	0.0229004	-0.14401	-0.171368	-0.0218044	0.0313952	0.437231	0.815505	-0.0707338	FALSE
CTNA2_MOUSE	(Q61301) Catenin alpha-2	0.168642	-0.0877334	0.130931	-0.0892673	0.119024	0.124328	0.361768	0.120352	0.015783	0.00432161	-0.0350469	0.437426	0.815505	0.0708613	FALSE
MLEC_MOUSE	(Q6ZQI3) Malectin	-0.194295	-0.289827	-0.575615	0.291604	-0.222633	-0.33825	-0.603841	-0.349235	-0.836501	-0.314733	0.0813396	0.437757	0.815505	-0.177088	FALSE
LNP_MOUSE	(Q7TQ95) Protein lunapark	-0.0831412	-0.21424	-0.128156	0.112367	-0.0424568	-0.027675	-0.07552	-0.293359	-0.2567	-0.212568	-0.110916	0.438623	0.815684	-0.0673064	FALSE
ATP5I_MOUSE	(Q06185) ATP synthase subunit e, mitochondrial	-0.212568	-0.00868224	-0.0528949	0.518031	-0.340075	0.172488	-0.0144996	-0.152003	0.117695	-0.190997	-0.194295	0.442009	0.820542	-0.146927	FALSE
RL26_MOUSE	(P61255) 60S ribosomal protein L26	-0.248108	-0.0350469	-0.516636	0.444667	0.0607392	-0.0649175	-0.475936	-0.21927	-1.00289	-0.307573	-0.018878	0.445293	0.825194	-0.201037	FALSE
ODPA_MOUSE	(P35486) Pyruvate dehydrogenase E1 component subunit alpha, somatic form, mitochondrial	0.0214797	0.293959	-0.0262051	0.293959	-0.0409718	-0.0573917	0.126973	0.183963	0.206643	0.0908534	-0.0513992	0.446137	0.825315	-0.0802739	FALSE
ATP5L_MOUSE	ATP synthase subunit g, mitochondrial OS=Mus musculus GN=Atp5l PE=1 SV=1	-0.39973	0.115033	-0.100051	-0.296899	0.0440443	-0.227692	1.98003	-0.496142	-0.139236	-0.0394883	-0.415037	0.451137	0.83311	0.271337	FALSE
LIPA3_MOUSE	(P60469) Liprin-alpha-3	0.0676387	-0.0232698	0.117695	-0.199255	0.105678	-0.0454314	0.227741	-0.00433459	0.0593553	0.0328061	0.00575927	0.45257	0.833652	0.0638084	FALSE
K6PF_MOUSE	(P47857) 6-phosphofructokinase, muscle type	-0.2567	-0.0558912	0.0703893	0.172488	0.00432161	0.191563	1.07176	-0.125006	-0.0454314	-0.112475	-0.0800879	0.453003	0.833652	0.146664	FALSE
IMPCT_MOUSE	(O55091) Protein IMPACT	0.27262	0.0468403	-0.169745	-0.261881	-0.0634092	-0.128156	-0.279284	0.279768	0.435095	0.105678	0.313826	0.454693	0.833933	0.12283	FALSE
STIP1_MOUSE	(Q60864) Stress-induced-phosphoprotein 1	-0.0320936	-0.0800879	-0.0350469	-0.107803	-0.0350469	0.123004	-0.192645	-0.093879	-0.171368	-0.136062	-0.199255	0.454729	0.833933	-0.0369924	FALSE
CPLX2_MOUSE	(P84086) Complexin-2	-0.0174171	-0.275786	0.1137	-0.224317	-0.0985055	-0.0619024	0.130931	-0.134477	0.0172093	0	-0.00144342	0.457313	0.836093	0.0797853	FALSE
TOLIP_MOUSE	(Q9QZ06) Toll-interacting protein	0.0827026	0.0285692	-0.013043	0.0621217	0.290424	-0.0424568	0.190299	0.0840643	-0.0424568	-0.00288828	0.0840643	0.459734	0.836093	0.0400624	FALSE
AKAP5_MOUSE	(D3YVF0) A-kinase anchor protein 5	-0.0969617	0.0440443	-0.0365259	-0.011588	-0.190997	-0.0694519	-0.118727	-0.110916	-0.101598	0.166073	-0.0306192	0.460718	0.836093	-0.0399189	FALSE
VGLU1_MOUSE	(Q3TXX4) Vesicular glutamate transporter 1	0.0071955	-0.33825	0.0635029	-0.494109	-0.373327	-0.0724828	-0.0800879	-0.246395	0.0648829	0.166073	0.0621217	0.461935	0.836093	0.121956	FALSE
GNAL_MOUSE	(Q8CGK7) Guanine nucleotide-binding protein G(olf) subunit alpha	-0.246395	-0.150401	-0.163268	-0.114035	-0.093879	-0.0800879	-0.354759	-0.332789	-0.16004	-0.100051	-0.365871	0.463588	0.836093	-0.043972	FALSE
WFS1_MOUSE	(P56695) Wolframin	-0.00578235	0.0271541	-0.0335695	0.00144197	0.051024	0.176323	-0.161653	0.1137	-0.145605	0.136191	0.100305	0.463809	0.836093	0.0413011	FALSE
DAAM1_MOUSE	(Q8BPM0) Disheveled-associated activator of morphogenesis 1	0.167358	0.0086303	-0.103147	-0.0892673	0.0989585	-0.0247367	-0.0101344	0.0426443	0.0426443	0.0342157	0.167358	0.464306	0.836093	0.0542422	FALSE
TPPC4_MOUSE	(Q9ES56) Trafficking protein particle complex subunit 4	-0.320126	-0.00288828	0.183963	0.312665	1.48903	0.367371	0.761285	0.986229	-0.231075	-0.859876	-0.362158	0.464879	0.836093	0.263855	FALSE
CKAP4_MOUSE	(Q8BMK4) Cytoskeleton-associated protein 4	-0.112475	0.173767	-0.753896	0.483364	-0.109359	-0.231075	-0.666576	-0.177882	-0.948976	0.0285692	0.0758749	0.465453	0.836093	-0.237608	FALSE
NRCAM_MOUSE	(Q810U4) Neuronal cell adhesion molecule	-0.0969617	0.237564	0.0071955	0.00575927	0.128293	0.108357	-0.077041	0.0690147	-0.21424	0.00288251	-0.239566	0.465481	0.836093	-0.0701463	FALSE
GUAD_MOUSE	(Q9R111) Guanine deaminase	0.0662614	0.0962619	0.015783	0.0881416	0.0758749	0.0468403	0.177599	0.0989585	0.169925	-0.0320936	0.102994	0.467602	0.836093	0.0248306	FALSE
CATD_MOUSE	(P18242) Cathepsin D	0.116365	0.404903	-0.161653	0.240009	-0.0985055	0.167358	-0.311148	0.317304	-0.00433459	0.0328061	0.169925	0.46863	0.836093	-0.110848	FALSE
RM09_MOUSE	(Q99N94) 39S ribosomal protein L9, mitochondrial	-0.109359	1.79618	-0.226004	0.318461	0.927517	-0.274041	-0.0664274	0.0840643	-0.100051	-0.311148	0.0840643	0.469189	0.836093	-0.395681	FALSE
WASF1_MOUSE	(Q8R5H6) Wiskott-Aldrich syndrome protein family member 1	-0.145605	0.0976108	0.0129262	0.0114956	-0.0203404	0.0607392	-0.0454314	-0.011588	-0.0218044	0.16221	0.166073	0.469546	0.836093	0.0473014	FALSE
CSN8_MOUSE	(Q8VBV7) COP9 signalosome complex subunit 8	0.269033	0.191563	0.117695	-0.027675	0.22033	-0.109359	0.0854247	0.0745054	0.0356239	0.100305	0.153157	0.470062	0.836093	-0.0576558	FALSE
SCAM1_MOUSE	(Q8K021) Secretory carrier-associated membrane protein 1	0.121679	0.14274	0.0690147	0.252173	0.279768	0.0717627	0.0635029	1.12367	-0.0144996	0.230203	0.0908534	0.470407	0.836093	0.117206	FALSE
EXOC3_MOUSE	(Q6KAR6) Exocyst complex component 3	-0.118727	0.244887	0.0881416	0.586885	0.167358	0.269033	0.155749	0.0086303	-0.106249	-0.0709665	0.0949116	0.470738	0.836093	-0.12623	FALSE
ACTN1_MOUSE	(Q7TPR4) Alpha-actinin-1	-0.0320936	0.282143	0.202888	-0.0969617	0.260628	0.295135	-0.0320936	0.471968	-0.132894	0.206643	0.187768	0.472034	0.836093	0.0905995	FALSE
PHB_MOUSE	(P67778) Prohibitin	0.0468403	0.129613	-0.123434	-0.0985055	-0.54372	-0.473931	0.102994	0.0524159	0.0565835	0.1137	-0.0306192	0.472444	0.836093	-0.0918535	FALSE
CAP2_MOUSE	(Q9CYT6) Adenylyl cyclase-associated protein 2	0.100305	-0.0144996	-0.0203404	0.100305	-0.0846703	-0.115597	0.0496308	0.108357	0.0398403	-0.0694519	0.104337	0.472792	0.836093	-0.0368074	FALSE
HEMH_MOUSE	(P22315) Ferrochelatase, mitochondrial	0.328836	0.286881	-0.177882	-0.229382	0.0989585	-0.277534	0.327687	0.298658	0.128293	0.387363	0.333424	0.473245	0.836093	0.133151	FALSE
RGS7_MOUSE	(O54829) Regulator of G-protein signaling 7	0.155749	0.22404	-0.00723157	-0.136062	0.0229004	0.0271541	-0.0484122	0.331132	0.14274	0.237564	0.21661	0.476014	0.836093	0.0736885	FALSE
ANK1_MOUSE	(Q02357) Ankyrin-1	0.209141	-0.21927	0.145351	0.15056	0.314986	0.227741	0.0976108	0.205393	0.107018	0.0676387	0.0565835	0.476355	0.836093	0.0824074	FALSE
CANB1_MOUSE	(Q63810) Calcineurin subunit B type 1	-0.013043	0.128293	-0.0232698	-0.21424	-0.190997	-0.00433459	0.595504	-0.304006	0.230203	0.0440443	0.0962619	0.478094	0.836093	0.0972327	FALSE
PCCA_MOUSE	(Q91ZA3) Propionyl-CoA carboxylase alpha chain, mitochondrial	-0.0923402	0.0758749	-0.011588	-0.0174171	-0.046921	-0.0649175	0.185232	-0.0800879	0.0398403	-0.169745	-0.284546	0.47878	0.836093	-0.0487959	FALSE
PDE1A_MOUSE	(Q61481) Calcium/calmodulin-dependent 3',5'-cyclic nucleotide phosphodiesterase 1A	-0.0800879	0.0607392	-0.00433459	0.0745054	0.0676387	-0.120294	0.104337	0.0114956	-0.0892673	-0.207561	0.0356239	0.479391	0.836093	-0.0409952	FALSE
VDAC1_MOUSE	(Q60932) Voltage-dependent anion-selective channel protein 1	0.195348	-0.231075	-0.0528949	0.23634	-0.929611	-0.473931	0.324235	-0.0558912	0.125651	0.0786098	0.16221	0.48027	0.836093	-0.146748	FALSE
RAB10_MOUSE	(P61027) Ras-related protein Rab-10	-0.194295	-0.0573917	0.015783	-0.158429	0.0976108	-0.0528949	0.0565835	0.0229004	-0.142417	-0.318326	0.0200577	0.480614	0.836093	0.053371	FALSE
RAB1B_MOUSE	(Q9D1G1) Ras-related protein Rab-1B	-0.242977	-0.448115	-0.018878	-0.12658	0.0468403	-0.0380063	0.0299829	-0.321928	-0.205896	-0.227692	-0.182786	0.481776	0.836093	0.0806396	FALSE
DIP2B_MOUSE	(Q3UH60) Disco-interacting protein 2 homolog B	-0.0350469	-0.60165	-1.03801	-0.657445	-0.0892673	-0.867752	-0.323733	-0.231075	-0.579922	-0.33825	-0.426625	0.482516	0.836093	0.174948	FALSE
DNM1L_MOUSE	(Q8K1M6) Dynamin-1-like protein	0.0593553	0.0342157	0.126973	-0.013043	0.117695	-0.0262051	-0.011588	0.051024	0.117695	-0.027675	-0.0664274	0.482785	0.836093	-0.0298011	FALSE
RL31_MOUSE	(P62900) 60S ribosomal protein L31	-0.152003	-0.0203404	-0.182786	0.381837	0.0565835	-0.277534	-0.182786	-0.0350469	-0.504305	-0.171368	0.312665	0.483148	0.836093	-0.121219	FALSE
AT2B2_MOUSE	(Q9R0K7) Plasma membrane calcium-transporting ATPase 2	0.0186342	-0.0985055	0.0565835	-0.147202	-0.0694519	-0.027675	-0.209228	0.0299829	-0.253257	0.0496308	-0.155213	0.484537	0.836093	-0.048122	FALSE
ATPA_MOUSE	(Q03265) ATP synthase subunit alpha, mitochondrial	-0.0558912	0.0200577	0	-0.00144342	-0.0816138	-0.112475	0.117695	-0.0350469	0.129613	-0.100051	-0.265345	0.484851	0.836093	-0.0402841	FALSE
AOFA_MOUSE	(Q64133) Amine oxidase [flavin-containing] A	-0.12658	-0.270556	-0.0603973	0.125651	-0.217591	-0.199255	0.0908534	-0.336428	-0.0439433	-0.120294	-0.26708	0.487436	0.836093	-0.0732777	FALSE
IGSF8_MOUSE	(Q8R366) Immunoglobulin superfamily member 8	0.0662614	-0.288065	0.134878	0.0243197	0.248535	0.0482362	-0.0335695	0.121679	0.0565835	0.0243197	-0.0365259	0.487893	0.836093	0.0769738	FALSE
KGUA_MOUSE	(Q64520) Guanylate kinase	-0.336428	-0.603841	-0.0908029	-0.558517	-0.426625	-0.179515	-0.109359	-0.531156	-0.161653	-0.362158	-0.318326	0.488661	0.836093	0.0989981	FALSE
PIMT_MOUSE	(P23506) Protein-L-isoaspartate(D-aspartate) O-methyltransferase	0.0524159	-0.386468	0.0731347	0.167358	-0.168123	0.0271541	0.041243	-0.440263	-0.0649175	-0.169745	-0.115597	0.489105	0.836093	-0.103788	FALSE
COF1_MOUSE	(P18760) Cofilin-1	0.0786098	0.0922074	0.0962619	-0.242977	-0.189351	0.0621217	0.015783	-0.362158	0.121679	0.015783	-0.161653	0.489688	0.836093	-0.0771393	FALSE
SPRE_MOUSE	(Q64105) Sepiapterin reductase	-0.163268	0.0745054	0.426533	0.428678	0.678072	0.0731347	0.302173	-0.163268	-0.0785637	-0.14401	-0.309359	0.489701	0.836093	-0.140444	FALSE
RL10A_MOUSE	(P53026) 60S ribosomal protein L10a	0.0426443	-0.0892673	-0.41889	0.321928	-0.0350469	-0.0409718	-0.606035	-0.0558912	-0.650635	-0.0846703	0.219091	0.490587	0.836093	-0.143269	FALSE
SEPT2_MOUSE	(P42208) Septin-2	-0.21424	-0.606035	0.367371	-0.865122	0.470927	0.111031	0.254594	-0.380822	-0.512514	-0.286304	-0.380822	0.491863	0.836093	0.226091	FALSE
NFU1_MOUSE	(Q9QZ23) NFU1 iron-sulfur cluster scaffold homolog, mitochondrial	-0.0588937	0.0676387	-0.161653	0	-0.0634092	-0.21424	0.22404	-0.0320936	-0.0679388	-0.186065	-0.345564	0.49228	0.836093	-0.0596688	FALSE
ASSY_MOUSE	(P16460) Argininosuccinate synthase	0.00144197	0.458382	0.0662614	0.0894982	-0.131313	0.0100637	-0.128156	0.175045	0.399445	-0.0350469	0.14274	0.49251	0.836093	-0.0920706	FALSE
PGTA_MOUSE	(Q9JHK4) Geranylgeranyl transferase type-2 subunit alpha	-0.104697	-0.0335695	0.0786098	-0.0543923	0.15056	-0.00723157	0	-0.0439433	-0.168123	-0.229382	-0.229382	0.493941	0.836093	-0.0468452	FALSE
CISY_MOUSE	(Q9CZU6) Citrate synthase, mitochondrial	-0.110916	-0.0409718	0.0607392	0.144046	-0.0439433	0.00288251	0.317304	-0.215915	0.00144197	-0.14401	-0.291592	0.494138	0.836093	-0.066629	FALSE
7B2_MOUSE	(P12961) Neuroendocrine protein 7B2	-0.114035	0.0524159	0.214125	0.382944	0.613532	0.371838	0.16221	0.200379	0.204141	-0.117161	0.186501	0.496034	0.836093	0.0977717	FALSE
STK39_MOUSE	(Q9Z1W9) STE20/SPS1-related proline-alanine-rich protein kinase	0.231432	-0.0679388	-0.275786	-0.323733	-0.202572	-0.641604	-0.295128	0.888305	0.196607	0.227741	0.172488	0.496861	0.836093	0.158412	FALSE
RS6_MOUSE	(P62754) 40S ribosomal protein S6	-0.152003	0.126973	-0.295128	0.471968	0.0342157	-0.182786	-0.0439433	0.0071955	-0.53952	-0.163268	0.176323	0.497825	0.836093	-0.139636	FALSE
TTYH1_MOUSE	(Q9D3A9) Protein tweety homolog 1	-0.401635	-0.687335	-0.118727	-0.231075	0.24245	0.280956	-0.275786	-0.222633	-0.648372	-0.237864	-0.710756	0.49822	0.836093	0.135121	FALSE
AOFB_MOUSE	(Q8BW75) Amine oxidase [flavin-containing] B	-0.1976	0.104337	-0.117161	0.119024	0.00288251	-0.298673	-0.0892673	0.0482362	-0.0499049	-0.0649175	-0.171368	0.49919	0.836093	-0.0661516	FALSE
GRM3_MOUSE	(Q9QYS2) Metabotropic glutamate receptor 3	0.144046	-0.0664274	-0.0365259	-0.0664274	-0.0409718	0.303342	-0.378944	0.261832	-0.345564	-0.182786	-0.236164	0.499257	0.836093	-0.0821316	FALSE
ATCAY_MOUSE	(Q8BHE3) Caytaxin	0.0200577	-0.171368	-0.00433459	-0.158429	0.240009	0.222805	0.0143553	-0.195946	-0.140826	-0.16004	-0.109359	0.499716	0.836093	0.0600898	FALSE
ACADL_MOUSE	(P51174) Long-chain specific acyl-CoA dehydrogenase, mitochondrial	0.24245	0.403813	1.0165	1.2135	1.1564	0.432959	1.26544	0.424385	0.320773	0.0172093	-0.112475	0.500562	0.836093	-0.218396	FALSE
COTL1_MOUSE	(Q9CQI6) Coactosin-like protein	-0.0664274	0.133564	-0.332789	0.126973	0.111031	-0.0923402	-0.139236	0.259423	0.00575927	0.117695	0.117695	0.501051	0.836093	0.0889597	FALSE
STAM1_MOUSE	(P70297) Signal transducing adapter molecule 1	-0.0679388	-0.314733	-0.145605	-0.155213	-0.242977	-0.00144342	-0.0306192	-0.415037	0.146655	-0.104697	-0.128156	0.501248	0.836093	0.0599759	FALSE
RS14_MOUSE	(P62264) 40S ribosomal protein S14	0.123004	-0.104697	0.051024	0.480265	0.192825	0.0328061	0.182692	0.102994	-0.75877	-0.00288828	0.314986	0.501684	0.836093	-0.128164	FALSE
PCSK1_MOUSE	(Q9QXV0) ProSAAS	-0.0923402	-0.136062	-0.00578235	-0.0101344	0.386259	0.0908534	-0.349235	0.00575927	0.126973	-0.21927	0.00432161	0.502535	0.836093	0.0676026	FALSE
SAP_MOUSE	(Q61207) Sulfated glycoprotein 1	0.0676387	0.517024	-0.354759	0.24245	-0.26708	-0.37707	-0.258425	0.246104	0.0989585	0.211635	0.121679	0.502971	0.836093	-0.150117	FALSE
RL40_MOUSE	(P62984) Ubiquitin-60S ribosomal protein L40	0.1137	0.481299	0.0813396	0.367371	0.0827026	0.360645	0.340277	0.227741	-0.0101344	0.155749	0.111031	0.503233	0.836093	-0.0797829	FALSE
MTPN_MOUSE	(P62774) Myotrophin	0.0635029	-0.0785637	0.00144197	-0.0573917	-0.103147	0.0908534	0.117695	-0.137648	0.14274	0.0786098	-0.0528949	0.506068	0.836617	0.037211	FALSE
PTPRD_MOUSE	(Q64487) Receptor-type tyrosine-protein phosphatase delta	0.144046	-0.215915	-0.465938	0.280956	-0.471929	-0.172994	-0.327348	-0.152003	-0.104697	-0.163268	0.0172093	0.506359	0.836617	-0.13222	FALSE
FUMH_MOUSE	(P97807) Fumarate hydratase, mitochondrial	-0.0350469	0.0854247	-0.07552	-0.236164	-0.237864	-0.174621	-0.131313	-0.452057	0.204141	-0.0588937	-0.0923402	0.506484	0.836617	-0.0693804	FALSE
ARM10_MOUSE	(Q9D0L7) Armadillo repeat-containing protein 10	0.173767	0.238787	-0.296899	-0.200913	-0.0424568	-0.37146	-0.265345	0.0854247	-0.0380063	-0.407364	0.112367	0.507037	0.836617	-0.111091	FALSE
ATPG_MOUSE	(Q91VR2) ATP synthase subunit gamma, mitochondrial	0.151859	0.863938	-0.0740006	0.0813396	-0.340075	-0.0649175	0.0299829	0.326537	0.516015	0.10165	0.051024	0.507495	0.836617	-0.167182	FALSE
NECP1_MOUSE	(Q9CR95) Adaptin ear-binding coat-associated protein 1	0.133564	-0.0513992	0.0243197	0.0243197	0.0186342	0.00144197	0.0690147	0.0342157	0.258217	0.0565835	0.0356239	0.508723	0.83734	0.034975	FALSE
AP2M1_MOUSE	(P84091) AP-2 complex subunit mu	0.0200577	0.284514	-0.0247367	-0.579922	-0.275786	0.0114956	-0.0543923	0.0200577	0.493647	0.0745054	0.21661	0.511217	0.839175	0.14447	FALSE
NUDC_MOUSE	(O35685) Nuclear migration protein nudC	-0.0816138	0.0071955	0.0854247	0.0690147	0.233888	0	0.149259	-0.123434	-0.128156	-0.168123	-0.169745	0.511448	0.839175	-0.0494782	FALSE
DHE3_MOUSE	(P26443) Glutamate dehydrogenase 1, mitochondrial	-0.202572	-0.00868224	0.0143553	-0.163268	-0.0740006	0.0579701	0.244887	-0.32916	0.27858	-0.0573917	-0.258425	0.512214	0.839175	0.0703931	FALSE
PARK7_MOUSE	(Q99LX0) Protein DJ-1	0.0962619	0.0129262	-0.0454314	-0.0846703	-0.28279	0.226509	-0.0335695	0.0786098	0.221568	0.0703893	0.045443	0.51439	0.840167	0.0518226	FALSE
PURA1_MOUSE	(P28650) Adenylosuccinate synthetase isozyme 1	0.729444	0.0565835	-0.018878	-0.0588937	0.412511	-0.086201	0.285698	0.646163	0.0551957	0.129613	0.898402	0.514404	0.840167	0.157419	FALSE
XPO2_MOUSE	(Q9ERK4) Exportin-2	0.0186342	0.199123	0.0243197	0.0840643	-0.0247367	0.107018	0.0100637	0.569491	0.196607	0.146655	-0.0144996	0.51679	0.842765	0.059979	FALSE
AT1A1_MOUSE	(Q8VDN2) Sodium/potassium-transporting ATPase subunit alpha-1	0.0786098	-0.121863	0.0867838	-0.0499049	0.0328061	0.0840643	-0.204233	-0.0320936	-0.0831412	0.0243197	-0.137648	0.519748	0.846288	-0.0435386	FALSE
CSDE1_MOUSE	(Q91W50) Cold shock domain-containing protein E1	-0.231075	0.259423	0.0186342	0.260628	0.132248	-0.0969617	0.0313952	-0.125006	-0.15682	-0.0218044	0.153157	0.520626	0.846416	-0.088873	FALSE
CA2D1_MOUSE	(O08532) Voltage-dependent calcium channel subunit alpha-2/delta-1	0.107018	-0.189351	0.22404	-0.0923402	-0.0892673	0.201634	-0.265345	0.111031	-0.077041	-0.139236	-0.194295	0.521506	0.84655	-0.0769873	FALSE
NHRF1_MOUSE	(P70441) Na(+)/H(+) exchange regulatory cofactor NHE-RF1	0.189034	-0.21424	-0.077041	-0.0380063	-0.100051	-0.0454314	-0.0159576	0.0342157	-0.37707	-0.0816138	-0.125006	0.524802	0.846636	-0.0664957	FALSE
IPO5_MOUSE	(Q8BKC5) Importin-5	-0.205896	-0.0603973	0.0635029	0.0172093	-0.172994	0.105678	-0.0877334	-0.254978	-0.222633	-0.110916	0.0538064	0.525633	0.846636	-0.0521432	FALSE
UBL4A_MOUSE	(P21126) Ubiquitin-like protein 4A	-0.0588937	0.117695	-0.0394883	0.0758749	0.288063	0.00288251	0.153157	0.418999	-0.07552	-0.120294	-0.0846703	0.525694	0.846636	0.0594341	FALSE
P5CS_MOUSE	(Q9Z110) Delta-1-pyrroline-5-carboxylate synthase	-0.0573917	0.1137	-0.0499049	-0.0424568	0.189034	0.0313952	0.226509	0.0370307	0.0717627	-0.164884	-0.134477	0.526081	0.846636	0.0456374	FALSE
A4_MOUSE	(P12023) Amyloid beta A4 protein	-0.184425	0.0356239	-0.164884	0.045443	-0.077041	-0.0499049	-0.295128	0.123004	-0.531156	-0.140826	0.0257376	0.527153	0.846636	-0.0679843	FALSE
ACOC_MOUSE	(P28271) Cytoplasmic aconitate hydratase	0.077243	0.147958	0.402722	0.292782	1.03069	0.0717627	0.95977	0.0342157	0.267835	-0.0484122	0.151859	0.527659	0.846636	0.122355	FALSE
FGF1_MOUSE	(P61148) Fibroblast growth factor 1	0.0840643	-0.100051	0.0607392	0.155749	-0.0159576	0.0100637	0.192825	-0.249822	0.123004	-0.152003	0.0758749	0.528028	0.846636	-0.0524133	FALSE
AT1A3_MOUSE	(Q6PIC6) Sodium/potassium-transporting ATPase subunit alpha-3	0.104337	-0.0694519	0.0172093	-0.0262051	-0.011588	0.0243197	-0.295128	0.182692	-0.0558912	0.0172093	-0.123434	0.52831	0.846636	-0.0438751	FALSE
REEP5_MOUSE	(Q60870) Receptor expression-enhancing protein 5	-0.147202	-0.224317	-0.0573917	-0.436354	-0.260152	0.0384362	-0.112475	-0.533242	-0.0558912	-0.0740006	-0.0101344	0.528748	0.846636	0.0723935	FALSE
SCG2_MOUSE	(Q03517) Secretogranin-2	-0.152003	-0.192645	0.0440443	-0.00144342	0.366252	0.14274	-0.093879	-0.0394883	-0.161653	-0.181149	-0.129734	0.531481	0.848127	0.0616673	FALSE
HPRT_MOUSE	(P00493) Hypoxanthine-guanine phosphoribosyltransferase	-0.0320936	-0.100051	-0.106249	-0.323733	-0.467932	-0.0634092	-0.394032	-0.155213	0.45628	0.137504	0.132248	0.531582	0.848127	0.0898811	FALSE
LRC59_MOUSE	(Q922Q8) Leucine-rich repeat-containing protein 59	0.0243197	0.0745054	-0.514573	0.590722	-0.0247367	-0.181149	-0.314733	0.249749	-0.590745	-0.186065	0.166073	0.532079	0.848127	-0.169687	FALSE
NCKP1_MOUSE	(P28660) Nck-associated protein 1	0.136191	0.0922074	-0.0634092	0.169925	0.00144197	0.0579701	-0.120294	0.318461	0.16092	0.299831	0.232661	0.533488	0.848502	0.0521272	FALSE
RLA2_MOUSE	(P99027) 60S acidic ribosomal protein P2	-0.110916	-0.181149	-0.463947	0.22033	-0.284546	-0.145605	-0.708396	-0.103147	-0.606035	-0.131313	0.200379	0.533916	0.848502	-0.120174	FALSE
UB2L3_MOUSE	(P68037) Ubiquitin-conjugating enzyme E2 L3	-0.112475	-0.140826	-0.107803	0.0356239	0.0758749	-0.153607	-0.186065	-0.224317	0.0976108	0.164786	-0.0262051	0.5358	0.850221	0.045381	FALSE
RM12_MOUSE	(Q9DB15) 39S ribosomal protein L12, mitochondrial	-0.142417	-0.662004	-0.0603973	-0.125006	-0.411195	-0.100051	-0.0543923	-0.380822	-0.426625	-0.608232	-0.490051	0.536745	0.850448	-0.105597	FALSE
CYBP_MOUSE	(Q9CXW3) Calcyclin-binding protein	-0.0785637	-0.046921	0.133564	0.0949116	-0.164884	0.27023	-0.161653	-0.109359	-0.134477	0.146655	-0.0380063	0.537658	0.850622	-0.053104	FALSE
FLOT1_MOUSE	(O08917) Flotillin-1	0.129613	-1.04097	0.465713	-0.734563	-0.529073	-0.202572	0.125651	0.396159	0.288063	-0.147202	-0.229382	0.540531	0.853307	0.25243	FALSE
BACH_MOUSE	(Q91V12) Cytosolic acyl coenzyme A thioester hydrolase	0.186501	0.811471	0.0342157	-0.174621	0.0524159	-0.00578235	0.0356239	0.659011	0.804054	0.572405	0.517024	0.541132	0.853307	0.162001	FALSE
TRIM2_MOUSE	(Q9ESN6) Tripartite motif-containing protein 2	-0.0159576	0.192825	-0.011588	-0.0454314	-0.318326	0.0908534	-0.260152	0.0854247	0.0071955	0.0243197	0.181421	0.541769	0.853307	-0.0569998	FALSE
SET_MOUSE	(Q9EQU5) Protein SET	-0.296899	-0.107803	-0.277534	-0.0394883	-0.192645	-0.106249	-0.50226	-0.401635	-0.506353	-0.0923402	0.0703893	0.544005	0.854546	-0.0668678	FALSE
GRM2_MOUSE	(Q14BI2) Metabotropic glutamate receptor 2	0.233888	-0.320126	-0.0484122	-0.284546	0.541019	-0.136062	0.0328061	0.381837	-0.190997	-0.440263	-0.117161	0.544846	0.854546	0.114967	FALSE
GRIN1_MOUSE	(Q3UNH4) G protein-regulated inducer of neurite outgrowth 1	0.0731347	0.0342157	-0.117161	0.0524159	-0.171368	0.0440443	-0.272297	0.16221	-0.265345	0.158337	0.0496308	0.545714	0.854546	-0.0527638	FALSE
DJC11_MOUSE	(Q5U458) DnaJ homolog subfamily C member 11	0.173767	-0.195946	-0.209228	-0.2567	-0.715486	-0.962969	0.35727	-0.373327	-0.0144996	0.0356239	-0.0649175	0.54578	0.854546	-0.126302	FALSE
1433F_MOUSE	(P68510) 14-3-3 protein eta	-0.114035	-0.153607	-0.0218044	-0.312939	-0.168123	-0.0262051	-0.137648	-0.242977	-0.0409718	-0.0816138	-0.0484122	0.54766	0.856223	0.0440322	FALSE
NFS1_MOUSE	(Q9Z1J3) Cysteine desulfurase, mitochondrial	-0.0785637	-0.284546	-0.0573917	-0.386468	-0.304006	0.0565835	0.0114956	-0.37707	0.232661	-0.279284	-0.242977	0.552807	0.858314	0.0728	FALSE
RN214_MOUSE	(Q8BFU3) RING finger protein 214	0.00575927	-0.251539	0.0786098	-0.0174171	-0.270556	0.0426443	-0.358454	0.199123	-0.392137	-0.07552	0.0482362	0.552814	0.858314	-0.069091	FALSE
SYVC_MOUSE	(Q9Z1Q9) Valine--tRNA ligase	-0.132894	-0.109359	-0.426625	0.14274	-0.0923402	0.0731347	-0.237864	-0.134477	-0.00723157	0.00575927	0.0342157	0.553339	0.858314	0.080277	FALSE
SNAA_MOUSE	(Q9DB05) Alpha-soluble NSF attachment protein	-0.018878	0.108357	0.0621217	0.175045	0.0551957	0.0717627	-0.00578235	0.128293	-0.0877334	0.111031	0.0813396	0.554144	0.858314	-0.0310749	FALSE
TMOD2_MOUSE	(Q9JKK7) Tropomodulin-2	-0.172994	0.158337	-0.148801	0.128293	0.0524159	0.0989585	-0.0144996	-0.14401	0.100305	0.200379	0.0799754	0.554774	0.858314	0.0621516	FALSE
HSP7C_MOUSE	(P63017) Heat shock cognate 71 kDa protein	0.0243197	0.0114956	0.0086303	0.0229004	-0.0262051	0.197865	-0.0306192	-0.0159576	0.0313952	0.0243197	0.0703893	0.555229	0.858314	0.0190475	FALSE
SCG1_MOUSE	(P16014) Secretogranin-1	-0.07552	-0.00868224	0.107018	0.0100637	0.145351	0.0935602	0.109695	0.0172093	-0.0499049	-0.0499049	0	0.555818	0.858314	0.0297809	FALSE
FRS1L_MOUSE	(B1AXV0) DOMON domain-containing protein FRRS1L	0.0328061	-1.18115	-0.0335695	0.136191	-0.0908029	-0.0484122	-0.011588	-0.0232698	-0.246395	0.051024	-0.0335695	0.557322	0.858314	0.203857	FALSE
PFD3_MOUSE	(P61759) Prefoldin subunit 3	-0.190997	-0.0528949	-0.0694519	0.271426	-0.00723157	0.0370307	-0.0969617	-0.272297	-0.104697	-0.103147	-0.00144342	0.557895	0.858314	-0.0679129	FALSE
VAS1_MOUSE	(Q9R1Q9) V-type proton ATPase subunit S1	-0.161653	-0.0679388	0.0840643	0.355016	-0.0350469	-0.179515	0.908429	0.0703893	-0.0144996	0.486457	-0.0785637	0.558215	0.858314	0.113006	FALSE
TBB5_MOUSE	(P99024) Tubulin beta-5 chain	-0.0740006	-0.115597	-0.0484122	0.0538064	0.0538064	0.119024	-0.202572	-0.0558912	-0.013043	-0.0588937	0.0648829	0.559235	0.858314	0.03281	FALSE
GRAP1_MOUSE	(Q8VD04) GRIP1-associated protein 1	0.0328061	-0.275786	0.308011	0.237564	0.295135	0.191563	0.517024	-0.0528949	0.100305	-0.013043	0.147958	0.559512	0.858314	0.0937865	FALSE
DNJA2_MOUSE	(Q9QYJ0) DnaJ homolog subfamily A member 2	-0.778432	-0.227692	-0.234465	-0.0513992	-0.284546	-0.0892673	0.0271541	-0.533242	-0.461959	-0.115597	-0.0218044	0.559747	0.858314	0.111674	FALSE
TCPG_MOUSE	(P80318) T-complex protein 1 subunit gamma	0.0285692	-0.018878	0.0676387	-0.0846703	0.119024	0.0071955	-0.0218044	-0.011588	-0.0846703	-0.117161	-0.093879	0.561177	0.858314	-0.0271482	FALSE
FGF12_MOUSE	Fibroblast growth factor 12 OS=Mus musculus GN=Fgf12 PE=2 SV=1	0.0881416	-0.21927	-0.37146	-0.224317	-0.161653	-0.189351	-0.298673	0.0799754	-0.0740006	-0.07552	-0.0846703	0.561459	0.858314	0.0668845	FALSE
C1TC_MOUSE	(Q922D8) C-1-tetrahydrofolate synthase, cytoplasmic	0.0299829	-0.00288828	0.0172093	0.0328061	0.0214797	0.00432161	0.0426443	0.463622	-0.0558912	-0.011588	-0.0350469	0.561953	0.858314	0.0420856	FALSE
TPIS_MOUSE	(P17751) Triosephosphate isomerase	0.117695	-0.270556	0.0551957	0.387363	-0.248108	-0.232769	-0.0588937	-0.0558912	0.356144	0.116365	-0.0454314	0.563824	0.858835	-0.0965078	FALSE
CAPR1_MOUSE	(Q60865) Caprin-1	-0.369595	-0.14401	-0.330973	-0.00433459	-0.592919	-0.131313	-0.504305	-0.16004	-0.545824	0.0551957	-0.14401	0.564351	0.858835	-0.0768028	FALSE
DLG3_MOUSE	(P70175) Disks large homolog 3	0.195348	-0.261881	-0.0439433	0.195348	0.129613	0.041243	-0.0499049	0.309176	-0.086201	0.205393	0.129613	0.564999	0.858835	0.0757724	FALSE
CA095_MOUSE	(Q0VBF8) Uncharacterized membrane protein C1orf95 homolog	-0.0218044	-0.161653	0.291604	0.962734	0.126973	0.0976108	0.539035	0.0086303	-0.123434	0.104337	-0.0335695	0.567627	0.858835	-0.164923	FALSE
MTX1_MOUSE	(P47802) Metaxin-1	0.0398403	0.254594	-0.182786	0.0551957	-0.321928	-0.490051	0.283329	0.0922074	-0.101598	0.164786	0.0908534	0.567869	0.858835	-0.0820539	FALSE
AL7A1_MOUSE	(Q9DBF1) Alpha-aminoadipic semialdehyde dehydrogenase	0.177599	0.137504	-0.0335695	0.146655	-0.284546	0.0786098	-0.011588	-0.093879	0.414677	0.140124	0.112367	0.568222	0.858835	-0.0562235	FALSE
GLOD4_MOUSE	(Q9CPV4) Glyoxalase domain-containing protein 4	-0.0816138	-0.254978	-0.0174171	0.0200577	-0.117161	-0.155213	0.0299829	-0.248108	-0.0923402	-0.112475	-0.184425	0.569449	0.858835	-0.0421892	FALSE
NB5R1_MOUSE	(Q9DB73) NADH-cytochrome b5 reductase 1	0.0867838	-0.302226	0.0962619	0.157044	-0.200913	-0.0218044	-0.00433459	-0.309359	-0.0335695	0.176323	-0.0513992	0.570377	0.858835	-0.0730454	FALSE
CUL5_MOUSE	(Q9D5V5) Cullin-5	0.0100637	0.0662614	0.117695	-0.0159576	0.195348	0.232661	0.0922074	0.0426443	-0.0247367	-0.0499049	0.0299829	0.570649	0.858835	0.0295131	FALSE
RT26_MOUSE	(Q80ZS3) 28S ribosomal protein S26, mitochondrial	0.0214797	-0.150401	0.176323	0.23634	0.140124	-0.0159576	0.435095	-0.184425	-0.134477	0.129613	-0.434403	0.571465	0.858835	-0.0801395	FALSE
NSF1C_MOUSE	(Q9CZ44) NSFL1 cofactor p47	0.147958	0.0482362	-0.189351	-0.0892673	-0.0800879	-0.0543923	-0.0800879	0.107018	0.217851	-0.0144996	0.125651	0.572155	0.858835	0.0522422	FALSE
TCPQ_MOUSE	(P42932) T-complex protein 1 subunit theta	0.0186342	-0.0816138	-0.0877334	-0.103147	-0.190997	-0.0619024	-0.231075	-0.0664274	0.0285692	-0.0365259	-0.0664274	0.572269	0.858835	-0.0257901	FALSE
PROF2_MOUSE	(Q9JJV2) Profilin-2	0.155749	-0.401635	0.0214797	-0.0513992	-0.0588937	0.205393	0.0398403	-0.00723157	0.0621217	-0.0558912	-0.125006	0.572827	0.858835	0.0775701	FALSE
HECAM_MOUSE	(Q640R3) Hepatocyte cell adhesion molecule	0.0607392	-0.0306192	-0.153607	0.0935602	0.0894982	0.434028	0.0538064	0.0717627	-0.12658	-0.027675	-0.168123	0.574476	0.859876	0.0541555	FALSE
PLAP_MOUSE	(P27612) Phospholipase A-2-activating protein	-0.0543923	-0.0365259	-0.0513992	-0.0969617	0.233888	-0.115597	0.102994	-0.0394883	-0.152003	-0.101598	-0.118727	0.576671	0.859876	0.0326009	FALSE
PDDC1_MOUSE	(Q8BFQ8) Parkinson disease 7 domain-containing protein 1	-0.0954196	-0.347399	0.105678	0.200379	0.257011	0.126973	0.0538064	-0.275786	0.0662614	-0.0877334	0.200379	0.577729	0.859876	0.0828919	FALSE
UBE2N_MOUSE	(P61089) Ubiquitin-conjugating enzyme E2 N	-0.0394883	-0.109359	0.169925	0.0071955	0.0717627	0.0356239	0.22033	-0.0619024	0.112367	-0.0664274	0.0285692	0.578387	0.859876	0.0415491	FALSE
KAP3_MOUSE	(P31324) cAMP-dependent protein kinase type II-beta regulatory subunit	0	0.0356239	0.0690147	-0.323733	-0.172994	-0.109359	-0.181149	0.214125	0.200379	0.144046	-0.018878	0.578713	0.859876	0.0656549	FALSE
ITPA_MOUSE	(Q9D892) Inosine triphosphate pyrophosphatase	-0.018878	-0.323733	0.0496308	-0.164884	-0.199255	-0.013043	-0.0892673	0.0086303	0.0313952	-0.155213	-0.00868224	0.5804	0.859876	0.0536896	FALSE
ASAP1_MOUSE	(Q9QWY8) Arf-GAP with SH3 domain, ANK repeat and PH domain-containing protein 1	-0.405451	-0.0203404	-0.103147	-0.571322	-0.239566	-0.0816138	-0.351074	-0.318326	-0.251539	-0.189351	0.0962619	0.581161	0.859876	0.0843211	FALSE
NFH_MOUSE	(P19246) Neurofilament heavy polypeptide	-0.364013	0.108357	0.158337	0.0976108	0.0894982	0.196607	-0.110916	-0.153607	-0.24127	-0.0558912	-0.296899	0.582345	0.859876	-0.0818555	FALSE
MPPA_MOUSE	(Q9DC61) Mitochondrial-processing peptidase subunit alpha	-0.0365259	0.301002	0.10165	0.259423	0.045443	0.015783	0.387363	0.145351	0.115033	0.0758749	-0.0740006	0.583697	0.859876	-0.0548378	FALSE
GDIR1_MOUSE	(Q99PT1) Rho GDP-dissociation inhibitor 1	-0.00868224	-0.246395	-0.0394883	-0.258425	-0.179515	0.0565835	-0.134477	-0.380822	0.105678	-0.110916	0.0440443	0.584223	0.859876	0.0526159	FALSE
LIN7C_MOUSE	(O88952) Protein lin-7 homolog C	0.0524159	-0.345564	-0.0484122	0.0635029	0.0827026	0.00432161	-0.163268	0.173767	-0.388355	-0.39973	-0.316528	0.584423	0.859876	-0.0743556	FALSE
TOM1_MOUSE	(O88746) Target of Myb protein 1	-0.013043	0.465713	-0.21927	0.0840643	0.6107	-0.405451	-0.123434	-0.011588	0.0662614	-0.26708	-0.0694519	0.584587	0.859876	-0.107944	FALSE
ANK2_MOUSE	(Q8C8R3) Ankyrin-2	-0.0320936	-0.0218044	-0.00433459	0.0717627	-0.0588937	0.0894982	-0.142417	-0.0159576	-0.137648	0.0922074	0.0243197	0.586288	0.859876	-0.0246526	FALSE
GP158_MOUSE	(Q8C419) Probable G-protein coupled receptor 158	-0.0439433	-0.169745	-0.293359	-0.434403	-0.309359	-0.298673	-0.471929	0.284514	-0.176251	-0.0499049	-0.136062	0.586401	0.859876	0.0699819	FALSE
PP2AA_MOUSE	(P63330) Serine/threonine-protein phosphatase 2A catalytic subunit alpha isoform	0.0935602	-0.0908029	-0.0159576	-0.14401	-0.0424568	-0.00433459	-0.0306192	0.134878	0.0129262	-0.0634092	-0.046921	0.586513	0.859876	0.0335974	FALSE
ALG2_MOUSE	(Q9DBE8) Alpha-1,3/1,6-mannosyltransferase ALG2	-0.128156	-0.0335695	-0.013043	0.116365	0.154454	0.232661	-0.300448	0.0621217	-0.0892673	-0.0365259	0.22404	0.586909	0.859876	0.0498917	FALSE
AKA12_MOUSE	(Q9WTQ5) A-kinase anchor protein 12	0.0482362	-0.405451	0.387363	0.0922074	0.286881	0.209141	0.0200577	0.228973	-0.0499049	-0.181149	0.447844	0.587312	0.859876	0.106817	FALSE
SIR2_MOUSE	(Q8VDQ8) NAD-dependent protein deacetylase sirtuin-2	-0.260152	0.205393	-0.0619024	-0.0634092	-0.00288828	0.0962619	-0.284546	-0.0831412	-0.0908029	0.0172093	-0.440263	0.589792	0.860899	-0.0675781	FALSE
RHG01_MOUSE	(Q5FWK3) Rho GTPase-activating protein 1	0.144046	-0.0679388	0.250962	-0.086201	0.136191	0.0524159	0.295135	0.00575927	0.314986	0.0243197	-0.0174171	0.590415	0.860899	0.055696	FALSE
HS74L_MOUSE	(P48722) Heat shock 70 kDa protein 4L	0.0426443	-0.00868224	0.0257376	0.0214797	0.284514	0.0524159	0.0328061	0.0114956	0.0703893	-0.114035	-0.0101344	0.590972	0.860899	0.0264839	FALSE
CRK_MOUSE	(Q64010) Adapter molecule crk	0.0989585	0.385155	-0.0831412	-0.260152	0.0285692	0.132248	0.112367	0.0717627	0.364012	-0.0291463	0.164786	0.591259	0.860899	0.0854518	FALSE
LPP3_MOUSE	(Q99JY8) Lipid phosphate phosphohydrolase 3	0.077243	-0.0335695	-0.0484122	0.0328061	0.674461	1.08066	-0.531156	0.246104	-0.311148	0.149259	-0.37146	0.593418	0.862858	0.1268	FALSE
HYEP_MOUSE	(Q9D379) Epoxide hydrolase 1	0.428678	0.015783	0.485427	0.448901	0.77905	0.370722	0.709291	0.77484	0.180148	0.149259	0.0717627	0.597594	0.866468	0.0888844	FALSE
VATB2_MOUSE	(P62814) V-type proton ATPase subunit B, brain isoform	-0.112475	-0.274041	0.0881416	-0.179515	-0.011588	-0.0159576	0.196607	-0.179515	0.00144197	-0.171368	-0.279284	0.597876	0.866468	0.0538059	FALSE
HCDH_MOUSE	(Q61425) Hydroxyacyl-coenzyme A dehydrogenase, mitochondrial	-0.0724828	0.0086303	0.0143553	-0.386468	-0.114035	0.0758749	0.125651	-0.289827	0.27739	-0.0785637	-0.281036	0.598354	0.866468	0.0683419	FALSE
PSB6_MOUSE	(Q60692) Proteasome subunit beta type-6	0.263034	-0.21424	0.16221	-0.205896	0.187768	-0.261881	0.343692	0.62854	0.0717627	-0.254978	-0.0409718	0.59951	0.866539	0.094999	FALSE
ACAD9_MOUSE	(Q8JZN5) Acyl-CoA dehydrogenase family member 9, mitochondrial	-0.0394883	0.0593553	-0.0892673	0.112367	0.0827026	-0.0785637	0.284514	0.0426443	0.183963	-0.0816138	-0.086201	0.600037	0.866539	0.0388935	FALSE
APOE_MOUSE	(P08226) Apolipoprotein E	0.0565835	0.0662614	-0.209228	0.380729	0.37629	-0.176251	0.0482362	0.186501	-0.426625	-0.0694519	-0.0174171	0.601529	0.867014	-0.084832	FALSE
VATD_MOUSE	(P57746) V-type proton ATPase subunit D	0.0731347	-0.340075	-0.00578235	-0.526992	-0.386468	0.0908534	-0.229382	-0.207561	-0.0954196	-0.210897	0.27858	0.602002	0.867014	0.0913153	FALSE
C1TM_MOUSE	(Q3V3R1) Monofunctional C1-tetrahydrofolate synthase, mitochondrial	-0.115597	-0.0218044	-0.112475	0.00288251	-0.155213	-0.0232698	0.0257376	0.0071955	0.0703893	-0.0588937	-0.132894	0.604347	0.868242	0.0236131	FALSE
RS8_MOUSE	(P62242) 40S ribosomal protein S8	-0.330973	-0.316528	-0.378944	0.147958	-0.327348	0.00288251	-0.394032	-0.488026	-0.805913	-0.265345	0.102994	0.604493	0.868242	-0.0910619	FALSE
CDC42_MOUSE	(P60766) Cell division control protein 42 homolog	-0.0144996	-0.168123	-0.176251	-0.224317	-0.358454	-0.0923402	-0.341903	-0.163268	-0.137648	-0.00433459	-0.171368	0.607003	0.870667	-0.0355332	FALSE
LETM1_MOUSE	(Q9Z2I0) LETM1 and EF-hand domain-containing protein 1, mitochondrial	0.0143553	-0.0709665	0.0299829	-0.0484122	-0.109359	-0.0513992	0.119024	0.0496308	0.0551957	-0.0174171	-0.0365259	0.610602	0.874646	0.0200672	FALSE
PGRC1_MOUSE	(O55022) Membrane-associated progesterone receptor component 1	-0.093879	0.21661	-0.134477	0.340277	0.120352	-0.0394883	0	0.181421	-0.212568	0.0370307	0.00575927	0.612491	0.876168	-0.0689176	FALSE
ACOT9_MOUSE	(Q9R0X4) Acyl-coenzyme A thioesterase 9, mitochondrial	0.200379	-0.07552	0.333424	0.275007	0.465713	-0.261881	0.353888	1.39287	-0.0985055	0.238787	0.0200577	0.613483	0.876404	0.118239	FALSE
NFASC_MOUSE	(Q810U3) Neurofascin	0.104337	-0.184425	0.0186342	-0.0877334	0.0976108	0.077243	-0.181149	0.257011	-0.132894	0.015783	-0.0816138	0.614516	0.876699	0.0447239	FALSE
SRGP2_MOUSE	(Q91Z67) SLIT-ROBO Rho GTPase-activating protein 2	-0.0232698	-0.0694519	0.0129262	0.169925	0.173767	0.0313952	0.051024	-0.217591	-0.0306192	-0.136062	0.0257376	0.61669	0.877769	-0.0371536	FALSE
SH3L1_MOUSE	(Q9JJU8) SH3 domain-binding glutamic acid-rich-like protein	0.199123	0.0745054	0.111031	-0.110916	0.173767	-0.0603973	0.0229004	0.276199	0.141433	0.0703893	0.141433	0.616923	0.877769	0.0409533	FALSE
NTRI_MOUSE	(Q99PJ0) Neurotrimin	0.107018	-0.318326	-0.027675	-0.163268	-0.163268	-0.136062	-0.0409718	-0.0877334	-0.281036	-0.187707	-0.171368	0.618265	0.8785	-0.0520296	FALSE
NCS1_MOUSE	(Q8BNY6) Neuronal calcium sensor 1	-0.0740006	0.243669	0.0496308	0.158337	0.14274	0.166073	0.0854247	0.199123	0.117695	0.111031	0.105678	0.622456	0.883016	0.0381287	FALSE
GBB1_MOUSE	(P62874) Guanine nucleotide-binding protein G(I)/G(S)/G(T) subunit beta-1	0.0703893	-0.325539	-0.0424568	-0.0816138	-0.367732	0.246104	-0.510457	0.0243197	-0.0262051	0.16092	0.324235	0.62313	0.883016	0.0735458	FALSE
CYTM1_MOUSE	(Q8K353) Cysteine-rich and transmembrane domain-containing protein 1	0.226509	-0.409278	-0.00288828	-0.129734	-0.0203404	-0.00578235	-0.152003	-0.28279	0.261832	0.219091	-0.018878	0.623943	0.883016	0.0790093	FALSE
PACN1_MOUSE	(Q61644) Protein kinase C and casein kinase substrate in neurons protein 1	0.0648829	0.111031	0.015783	-0.166503	-0.0785637	0.0100637	-0.0558912	0.125651	0.151859	0.0690147	0.0745054	0.62521	0.88363	0.0360784	FALSE
CP46A_MOUSE	(Q9WVK8) Cholesterol 24-hydroxylase	-0.00144342	0.132248	-0.179515	0.0621217	-0.0528949	-0.0679388	-0.394032	0.360645	-0.239566	-0.0306192	0.0551957	0.626951	0.884911	-0.0560971	FALSE
MPP2_MOUSE	(Q9WV34) MAGUK p55 subfamily member 2	0.0949116	-0.093879	0.0100637	-0.15682	0.0593553	-0.086201	0.0398403	0.102994	-0.121863	0.0935602	-0.103147	0.627904	0.885021	0.0342222	FALSE
MCCA_MOUSE	(Q99MR8) Methylcrotonoyl-CoA carboxylase subunit alpha, mitochondrial	-0.0439433	0.0593553	-0.0740006	0.187768	0.168642	-0.0101344	0.219091	-0.231075	0.0200577	-0.0262051	-0.224317	0.628699	0.885021	-0.0442863	FALSE
NCAM1_MOUSE	(P13595) Neural cell adhesion molecule 1	-0.137648	-0.204233	-0.0573917	-0.107803	0.0813396	-0.0365259	-0.254978	-0.0144996	-0.215915	-0.128156	-0.129734	0.629789	0.88538	0.0269877	FALSE
EF1A2_MOUSE	(P62631) Elongation factor 1-alpha 2	-0.209228	0.0257376	0.190299	-0.26708	0.0257376	-1.3474	-0.0923402	-0.239566	0.146655	0.181421	0.0745054	0.631456	0.886547	-0.113645	FALSE
PSD3_MOUSE	(Q2PFD7) PH and SEC7 domain-containing protein 3	-0.027675	0.133564	0.0257376	-0.132894	-0.150401	0.0621217	-0.251539	0.0949116	-0.123434	0.348232	0.396159	0.632991	0.887527	0.0540387	FALSE
ATP5H_MOUSE	(Q9DCX2) ATP synthase subunit d, mitochondrial	-0.0985055	-0.375197	-0.027675	-0.403542	-0.637109	-0.375197	-0.336428	-0.50226	0.0214797	-0.018878	-0.192645	0.635561	0.889954	-0.0653469	FALSE
[truncated: 303 more rows]
